# Supplementary material for: Host generalists dominate fungal communities associated with alpine knotweed roots: a study of Sebacinales
Source: PeerJ journal article supplement (doi:10.7717/peerj.14047), 2022-10-05

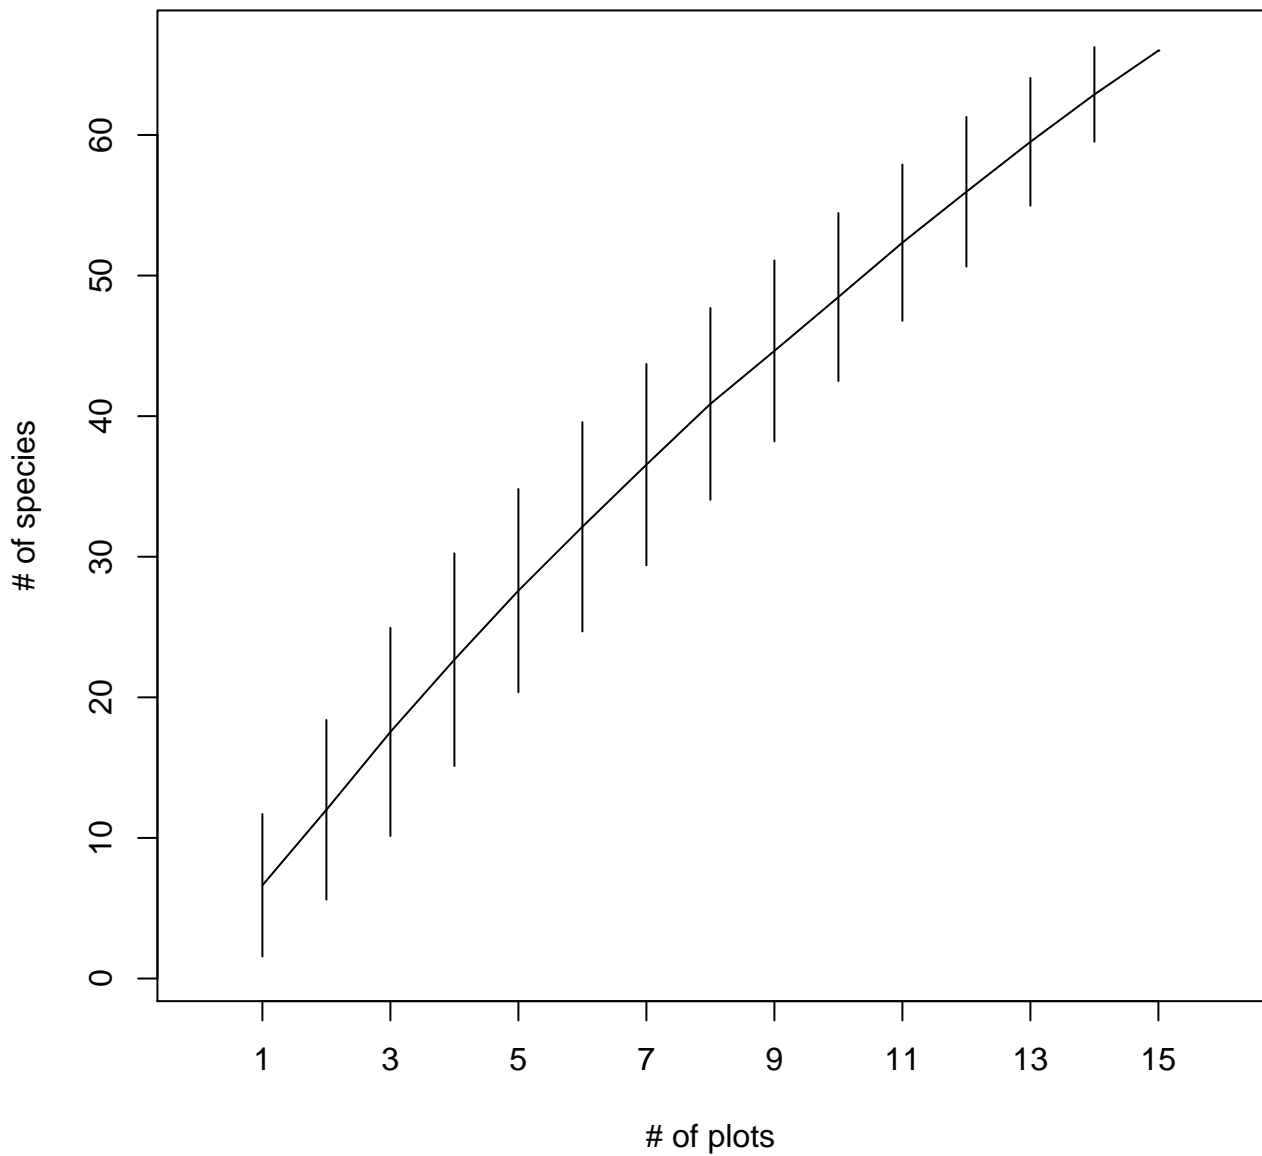

Supplement: Figure_S2.pdf [file Figure_S2.pdf]
