# Supplementary material for: Host generalists dominate fungal communities associated with alpine knotweed roots: a study of Sebacinales
Source: PubMed Central journal article supplement (PMC9547586; doi:10.7717/peerj.14047), 2022-10-05

Tree scale: 1

**Host**

- Bistorta vivipara
- Eudicotyledonae
- Pinopsida
- Monocotyledonae
- Equisetopsida
- Angiospermae
- Lycopodiopsida
- Bryopsida

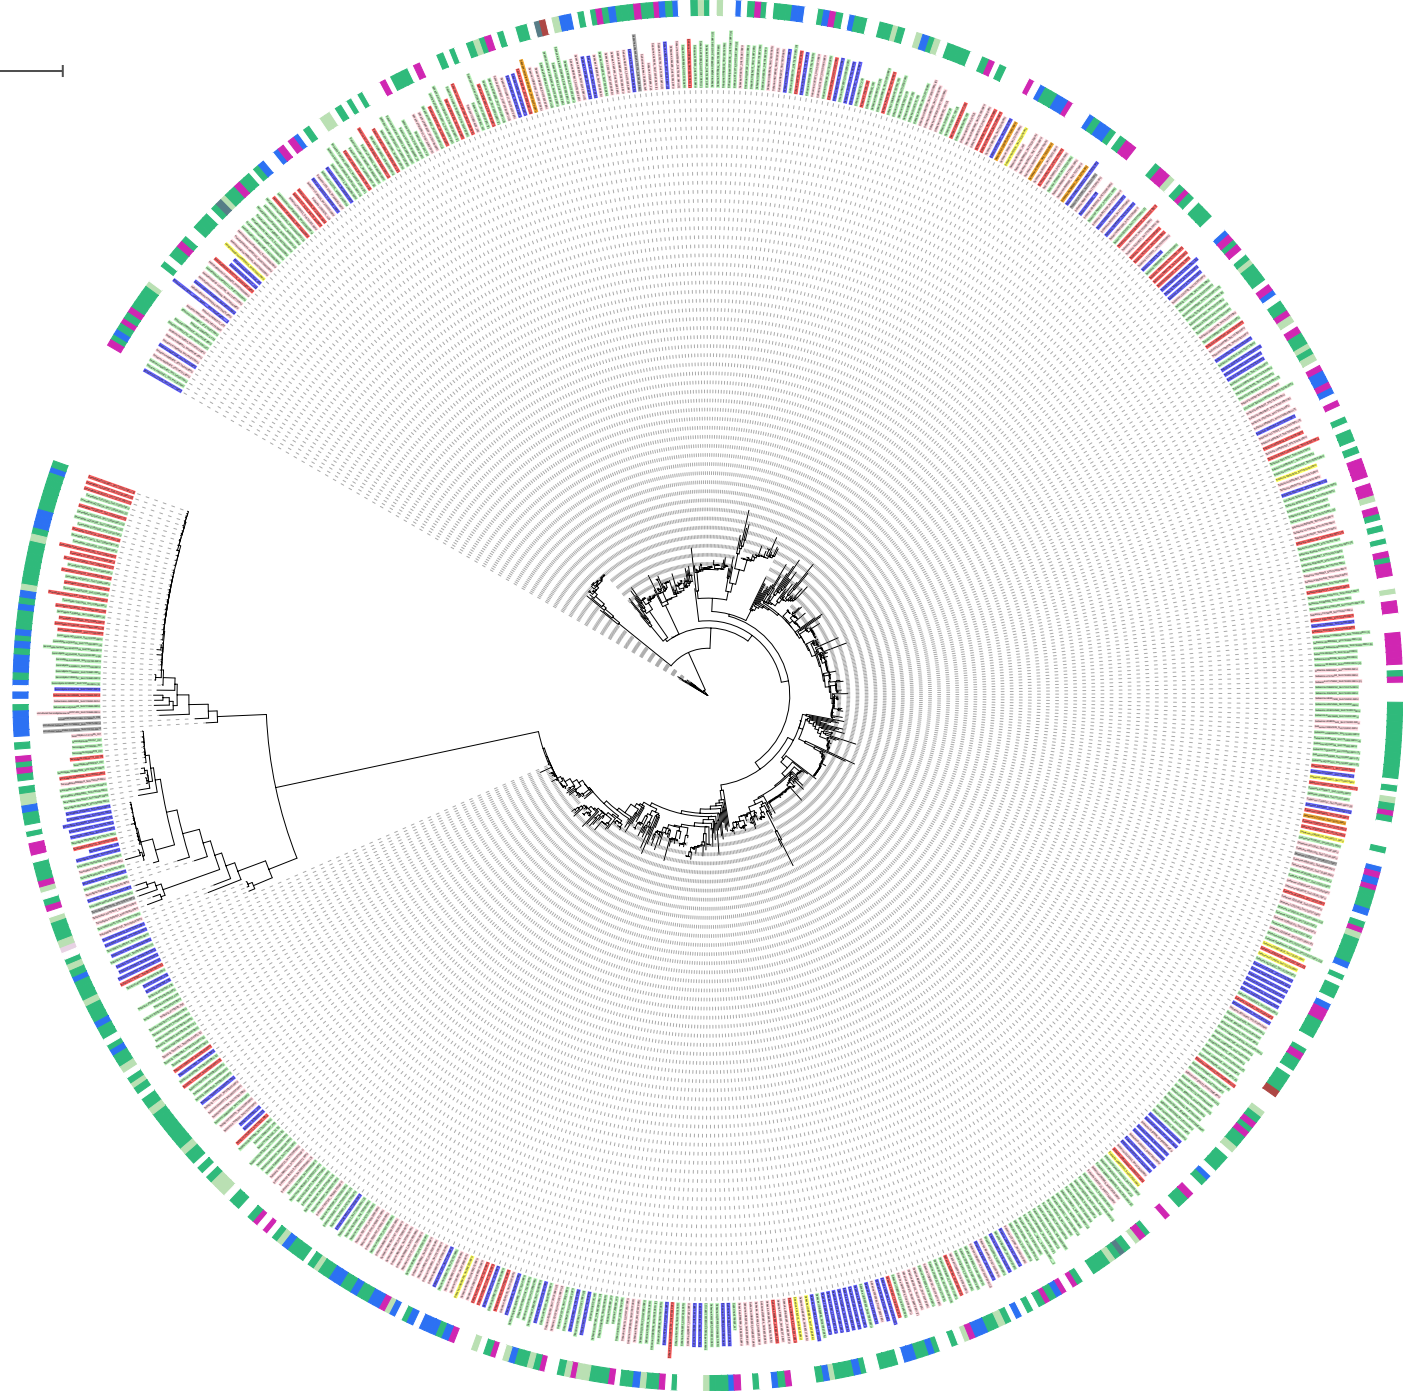

Supplement: peerj-10-14047-s001.pdf [file peerj-10-14047-s001.pdf]
