# Supplementary material for: Host generalists dominate fungal communities associated with alpine knotweed roots: a study of Sebacinales
Source: PeerJ. 2022 Oct 5;10:e14047. doi: 10.7717/peerj.14047 (PMC9547586; doi:10.7717/peerj.14047)
Supplement: Supplemental Information 3 — Assignment of sequences to fungal species hypotheses using hierarchical clustering on a 1.0% distance threshold. [file peerj-10-14047-s003.xlsx]

## Sheet: B_vivipara_matches_out_99_all_p
seq_id_tmp	seq_accno	host	geography	status (1.0)	SH code (1.0)	SH/compound taxonomy (1.0)	compound_cl_code (1.0)	Compound taxonomy (1.0)
8114_1	EF621932	Bistorta vivipara	Unspecified	present_in	SH1674396.08FU	k__Fungi;p__Basidiomycota;c__Microbotryomycetes;o__Microbotryales;f__Microbotryaceae;g__Microbotryum;s__Microbotryum_bistortarum	UCL8_001859	k__Fungi;p__Basidiomycota;c__Microbotryomycetes;o__Microbotryales
8114_2	EF621930	Bistorta vivipara	Unspecified	present_in	SH1674396.08FU	k__Fungi;p__Basidiomycota;c__Microbotryomycetes;o__Microbotryales;f__Microbotryaceae;g__Microbotryum;s__Microbotryum_bistortarum	UCL8_001859	k__Fungi;p__Basidiomycota;c__Microbotryomycetes;o__Microbotryales
8114_3	EF621929	Bistorta vivipara	Unspecified	present_in	SH1674396.08FU	k__Fungi;p__Basidiomycota;c__Microbotryomycetes;o__Microbotryales;f__Microbotryaceae;g__Microbotryum;s__Microbotryum_bistortarum	UCL8_001859	k__Fungi;p__Basidiomycota;c__Microbotryomycetes;o__Microbotryales
8114_4	AY588113	Bistorta vivipara	Switzerland	present_in	SH1674396.08FU	k__Fungi;p__Basidiomycota;c__Microbotryomycetes;o__Microbotryales;f__Microbotryaceae;g__Microbotryum;s__Microbotryum_bistortarum	UCL8_001859	k__Fungi;p__Basidiomycota;c__Microbotryomycetes;o__Microbotryales
8114_5	AY588086	Bistorta vivipara	Germany	present_in	SH1674396.08FU	k__Fungi;p__Basidiomycota;c__Microbotryomycetes;o__Microbotryales;f__Microbotryaceae;g__Microbotryum;s__Microbotryum_bistortarum	UCL8_001859	k__Fungi;p__Basidiomycota;c__Microbotryomycetes;o__Microbotryales
8114_364	HQ154377|TUB 019455_A1	Bistorta vivipara	Germany	present_in	SH1731074.08FU	k__Fungi;p__Basidiomycota;c__Agaricomycetes;o__Sebacinales;f__Sebacinaceae;g__Sebacina;s__Sebacina_sp	UCL8_007582	k__Fungi;p__Basidiomycota;c__Agaricomycetes;o__Sebacinales
8114_365	HQ154375|TUB 019454_H2	Bistorta vivipara	Germany	present_in	SH1682213.08FU	k__Fungi;p__Basidiomycota;c__Agaricomycetes;o__Sebacinales;f__Sebacinaceae;g__Sebacina;s__Sebacina_sp	UCL8_003407	k__Fungi;p__Basidiomycota;c__Agaricomycetes;o__Sebacinales
8114_366	HQ154376|TUB 019455_4A	Bistorta vivipara	Germany	present_in	SH1731074.08FU	k__Fungi;p__Basidiomycota;c__Agaricomycetes;o__Sebacinales;f__Sebacinaceae;g__Sebacina;s__Sebacina_sp	UCL8_007582	k__Fungi;p__Basidiomycota;c__Agaricomycetes;o__Sebacinales
8114_367	HQ154374|TUB 019454_C2	Bistorta vivipara	Germany	present_in	SH1731271.08FU	k__Fungi;p__Basidiomycota;c__Agaricomycetes;o__Sebacinales;f__Sebacinaceae;g__Sebacina;s__Sebacina_sp	UCL8_007582	k__Fungi;p__Basidiomycota;c__Agaricomycetes;o__Sebacinales
8114_369	UDB014604|MM521	Bistorta vivipara	Estonia	new_sh_in	76	k__Fungi;p__Basidiomycota;c__Agaricomycetes;o__Sebacinales	UCL8_001587	k__Fungi;p__Basidiomycota;c__Agaricomycetes;o__Sebacinales
8114_371	UDB014606|MM534	Bistorta vivipara	Estonia	present_in	SH1731018.08FU	k__Fungi;p__Basidiomycota;c__Agaricomycetes;o__Sebacinales;f__Sebacinaceae;g__Sebacina;s__Sebacina_sp	UCL8_007582	k__Fungi;p__Basidiomycota;c__Agaricomycetes;o__Sebacinales
8114_372	UDB014607|MM550	Bistorta vivipara	Estonia	new_sh_in	77	k__Fungi;p__Basidiomycota;c__Agaricomycetes;o__Sebacinales	UCL8_007582	k__Fungi;p__Basidiomycota;c__Agaricomycetes;o__Sebacinales
8114_374	KF061285	Bistorta vivipara	Unspecified	present_in	SH1723664.08FU	k__Fungi;p__Basidiomycota;c__Agaricomycetes;o__Sebacinales;f__Serendipitaceae;g__Serendipita;s__Serendipita_herbamans	UCL8_007058	k__Fungi;p__Basidiomycota;c__Agaricomycetes;o__Sebacinales
8114_373	UDB014608|MM579	Bistorta vivipara	Estonia	present_in	SH1675903.08FU	k__Fungi;p__Basidiomycota;c__Agaricomycetes;o__Sebacinales;f__Sebacinaceae;g__Helvellosebacina;s__Helvellosebacina_sp	UCL8_002190	k__Fungi;p__Basidiomycota;c__Agaricomycetes;o__Sebacinales
8114_375	KF000687	Bistorta vivipara	Germany	new_sh_in	78	k__Fungi;p__Basidiomycota;c__Agaricomycetes;o__Thelephorales	UCL8_000001	k__Fungi;p__Basidiomycota;c__Agaricomycetes;o__Thelephorales
8114_376	KF000686	Bistorta vivipara	Germany	new_sh_in	78	k__Fungi;p__Basidiomycota;c__Agaricomycetes;o__Thelephorales	UCL8_000001	k__Fungi;p__Basidiomycota;c__Agaricomycetes;o__Thelephorales
8114_377	KF000685	Bistorta vivipara	Germany	new_sh_in	79	k__Fungi;p__Basidiomycota;c__Agaricomycetes;o__Sebacinales	UCL8_007582	k__Fungi;p__Basidiomycota;c__Agaricomycetes;o__Sebacinales
8114_378	KF000684	Bistorta vivipara	Germany	present_in	SH1690086.08FU	k__Fungi;p__Basidiomycota;c__Agaricomycetes;o__Agaricales;f__Inocybaceae;g__Inocybe;s__Inocybe_sp	UCL8_004422	k__Fungi;p__Basidiomycota;c__Agaricomycetes;o__Agaricales
8114_379	KF000683	Bistorta vivipara	Germany	new_sh_in	80	k__Fungi;p__Basidiomycota;c__Agaricomycetes;o__Thelephorales	UCL8_000001	k__Fungi;p__Basidiomycota;c__Agaricomycetes;o__Thelephorales
8114_380	KF000682	Bistorta vivipara	Germany	new_sh_in	78	k__Fungi;p__Basidiomycota;c__Agaricomycetes;o__Thelephorales	UCL8_000001	k__Fungi;p__Basidiomycota;c__Agaricomycetes;o__Thelephorales
8114_381	KF000681	Bistorta vivipara	Germany	present_in	SH1691162.08FU	k__Fungi;p__Basidiomycota;c__Agaricomycetes;o__Thelephorales;f__Thelephoraceae;g__Tomentella;s__Tomentella_sp	UCL8_004608	k__Fungi;p__Basidiomycota;c__Agaricomycetes;o__Thelephorales
8114_382	KF000680	Bistorta vivipara	Germany	present_in	SH1731021.08FU	k__Fungi;p__Basidiomycota;c__Agaricomycetes;o__Sebacinales;f__Sebacinaceae;g__Sebacina;s__Sebacina_sp	UCL8_007582	k__Fungi;p__Basidiomycota;c__Agaricomycetes;o__Sebacinales
8114_383	KF000679	Bistorta vivipara	Germany	new_sh_in	78	k__Fungi;p__Basidiomycota;c__Agaricomycetes;o__Thelephorales	UCL8_000001	k__Fungi;p__Basidiomycota;c__Agaricomycetes;o__Thelephorales
8114_384	KF000678	Bistorta vivipara	Germany	present_in	SH1660266.08FU	k__Fungi;p__Basidiomycota;c__Agaricomycetes;o__Thelephorales;f__Thelephoraceae;g__unidentified;s__Thelephoraceae_sp	UCL8_000001	k__Fungi;p__Basidiomycota;c__Agaricomycetes;o__Thelephorales
8114_386	KF000676	Bistorta vivipara	Germany	present_in	SH1677362.08FU	k__Fungi;p__Ascomycota;c__Pezizomycetes;o__Pezizales;f__Pyronemataceae;g__Trichophaea;s__Trichophaea_sp	UCL8_002400	k__Fungi;p__Ascomycota;c__Pezizomycetes;o__Pezizales
8114_385	KF000677	Bistorta vivipara	Germany	present_in	SH1707070.08FU	k__Fungi;p__Basidiomycota;c__Agaricomycetes;o__Agaricales;f__Inocybaceae;g__Inocybe;s__Inocybe_sp	UCL8_005558	k__Fungi;p__Basidiomycota;c__Agaricomycetes;o__Agaricales
8114_387	KF000675	Bistorta vivipara	Germany	present_in	SH1682250.08FU	k__Fungi;p__Basidiomycota;c__Agaricomycetes;o__Sebacinales;f__Sebacinaceae;g__Sebacina;s__Sebacina_sp	UCL8_003407	k__Fungi;p__Basidiomycota;c__Agaricomycetes;o__Sebacinales
8114_388	KF000674	Bistorta vivipara	Germany	present_in	SH1660266.08FU	k__Fungi;p__Basidiomycota;c__Agaricomycetes;o__Thelephorales;f__Thelephoraceae;g__unidentified;s__Thelephoraceae_sp	UCL8_000001	k__Fungi;p__Basidiomycota;c__Agaricomycetes;o__Thelephorales
8114_389	KF000673	Bistorta vivipara	Germany	present_in	SH1731021.08FU	k__Fungi;p__Basidiomycota;c__Agaricomycetes;o__Sebacinales;f__Sebacinaceae;g__Sebacina;s__Sebacina_sp	UCL8_007582	k__Fungi;p__Basidiomycota;c__Agaricomycetes;o__Sebacinales
8114_390	KF000672	Bistorta vivipara	Germany	present_in	SH1660266.08FU	k__Fungi;p__Basidiomycota;c__Agaricomycetes;o__Thelephorales;f__Thelephoraceae;g__unidentified;s__Thelephoraceae_sp	UCL8_000001	k__Fungi;p__Basidiomycota;c__Agaricomycetes;o__Thelephorales
8114_391	KF000671	Bistorta vivipara	Germany	present_in	SH1731002.08FU	k__Fungi;p__Basidiomycota;c__Agaricomycetes;o__Sebacinales;f__Sebacinaceae;g__Sebacina;s__Sebacina_sp	UCL8_007582	k__Fungi;p__Basidiomycota;c__Agaricomycetes;o__Sebacinales
8114_392	KF000670	Bistorta vivipara	Germany	new_sh_in	78	k__Fungi;p__Basidiomycota;c__Agaricomycetes;o__Thelephorales	UCL8_000001	k__Fungi;p__Basidiomycota;c__Agaricomycetes;o__Thelephorales
8114_393	KF000669	Bistorta vivipara	Germany	present_in	SH1690086.08FU	k__Fungi;p__Basidiomycota;c__Agaricomycetes;o__Agaricales;f__Inocybaceae;g__Inocybe;s__Inocybe_sp	UCL8_004422	k__Fungi;p__Basidiomycota;c__Agaricomycetes;o__Agaricales
8114_395	KF000667	Bistorta vivipara	Germany	present_in	SH1691386.08FU	k__Fungi;p__Basidiomycota;c__Agaricomycetes;o__Thelephorales;f__Thelephoraceae;g__Tomentella;s__Tomentella_sp	UCL8_004608	k__Fungi;p__Basidiomycota;c__Agaricomycetes;o__Thelephorales
8114_396	KF000666	Bistorta vivipara	Germany	present_in	SH1731013.08FU	k__Fungi;p__Basidiomycota;c__Agaricomycetes;o__Sebacinales;f__Sebacinaceae;g__Sebacina;s__Sebacina_sp	UCL8_007582	k__Fungi;p__Basidiomycota;c__Agaricomycetes;o__Sebacinales
8114_397	KF000665	Bistorta vivipara	Germany	present_in	SH1659889.08FU	k__Fungi;p__Basidiomycota;c__Agaricomycetes;o__Thelephorales;f__Thelephoraceae;g__Tomentella;s__Tomentella_sp	UCL8_000001	k__Fungi;p__Basidiomycota;c__Agaricomycetes;o__Thelephorales
8114_398	KF000664	Bistorta vivipara	Germany	present_in	SH1690086.08FU	k__Fungi;p__Basidiomycota;c__Agaricomycetes;o__Agaricales;f__Inocybaceae;g__Inocybe;s__Inocybe_sp	UCL8_004422	k__Fungi;p__Basidiomycota;c__Agaricomycetes;o__Agaricales
8114_399	KF000663	Bistorta vivipara	Germany	present_in	SH1690086.08FU	k__Fungi;p__Basidiomycota;c__Agaricomycetes;o__Agaricales;f__Inocybaceae;g__Inocybe;s__Inocybe_sp	UCL8_004422	k__Fungi;p__Basidiomycota;c__Agaricomycetes;o__Agaricales
8114_400	KF000662	Bistorta vivipara	Germany	new_sh_in	81	k__Fungi;p__Basidiomycota;c__Agaricomycetes;o__Thelephorales	UCL8_000001	k__Fungi;p__Basidiomycota;c__Agaricomycetes;o__Thelephorales
8114_401	KF000661	Bistorta vivipara	Germany	new_sh_in	78	k__Fungi;p__Basidiomycota;c__Agaricomycetes;o__Thelephorales	UCL8_000001	k__Fungi;p__Basidiomycota;c__Agaricomycetes;o__Thelephorales
8114_402	KF000660	Bistorta vivipara	Germany	present_in	SH1677362.08FU	k__Fungi;p__Ascomycota;c__Pezizomycetes;o__Pezizales;f__Pyronemataceae;g__Trichophaea;s__Trichophaea_sp	UCL8_002400	k__Fungi;p__Ascomycota;c__Pezizomycetes;o__Pezizales
8114_403	KF000659	Bistorta vivipara	Germany	new_sh_in	79	k__Fungi;p__Basidiomycota;c__Agaricomycetes;o__Sebacinales	UCL8_007582	k__Fungi;p__Basidiomycota;c__Agaricomycetes;o__Sebacinales
8114_404	KF000658	Bistorta vivipara	Germany	present_in	SH1690915.08FU	k__Fungi;p__Basidiomycota;c__Agaricomycetes;o__Thelephorales;f__Thelephoraceae;g__Tomentella;s__Tomentella_pilosa	UCL8_004608	k__Fungi;p__Basidiomycota;c__Agaricomycetes;o__Thelephorales
8114_405	KF000657	Bistorta vivipara	Germany	new_sh_in	78	k__Fungi;p__Basidiomycota;c__Agaricomycetes;o__Thelephorales	UCL8_000001	k__Fungi;p__Basidiomycota;c__Agaricomycetes;o__Thelephorales
8114_406	KF000656	Bistorta vivipara	Germany	present_in	SH1731013.08FU	k__Fungi;p__Basidiomycota;c__Agaricomycetes;o__Sebacinales;f__Sebacinaceae;g__Sebacina;s__Sebacina_sp	UCL8_007582	k__Fungi;p__Basidiomycota;c__Agaricomycetes;o__Sebacinales
8114_407	KF000655	Bistorta vivipara	Germany	present_in	SH1733721.08FU	k__Fungi;p__Ascomycota;c__Pezizomycetes;o__Pezizales;f__Pyronemataceae;g__Genea;s__Genea_sp	UCL8_007795	k__Fungi;p__Ascomycota;c__Pezizomycetes;o__Pezizales
8114_408	KF000654	Bistorta vivipara	Germany	present_in	SH1733721.08FU	k__Fungi;p__Ascomycota;c__Pezizomycetes;o__Pezizales;f__Pyronemataceae;g__Genea;s__Genea_sp	UCL8_007795	k__Fungi;p__Ascomycota;c__Pezizomycetes;o__Pezizales
8114_409	KF000653	Bistorta vivipara	Germany	new_sh_in	82	k__Fungi;p__Basidiomycota;c__Agaricomycetes;o__Agaricales	UCL8_006215	k__Fungi;p__Basidiomycota;c__Agaricomycetes;o__Agaricales
8114_410	KF000652	Bistorta vivipara	Germany	present_in	SH1731021.08FU	k__Fungi;p__Basidiomycota;c__Agaricomycetes;o__Sebacinales;f__Sebacinaceae;g__Sebacina;s__Sebacina_sp	UCL8_007582	k__Fungi;p__Basidiomycota;c__Agaricomycetes;o__Sebacinales
8114_411	KF000651	Bistorta vivipara	Germany	new_sh_in	79	k__Fungi;p__Basidiomycota;c__Agaricomycetes;o__Sebacinales	UCL8_007582	k__Fungi;p__Basidiomycota;c__Agaricomycetes;o__Sebacinales
8114_412	KF000650	Bistorta vivipara	Germany	new_sh_in	79	k__Fungi;p__Basidiomycota;c__Agaricomycetes;o__Sebacinales	UCL8_007582	k__Fungi;p__Basidiomycota;c__Agaricomycetes;o__Sebacinales
8114_413	KF000649	Bistorta vivipara	Germany	duplicate_of_KF000650	79	k__Fungi;p__Basidiomycota;c__Agaricomycetes;o__Sebacinales	UCL8_007582
8114_414	KF000648	Bistorta vivipara	Germany	new_sh_in	79	k__Fungi;p__Basidiomycota;c__Agaricomycetes;o__Sebacinales	UCL8_007582	k__Fungi;p__Basidiomycota;c__Agaricomycetes;o__Sebacinales
8114_415	KF000647	Bistorta vivipara	Germany	new_sh_in	79	k__Fungi;p__Basidiomycota;c__Agaricomycetes;o__Sebacinales	UCL8_007582	k__Fungi;p__Basidiomycota;c__Agaricomycetes;o__Sebacinales
8114_416	KF000646	Bistorta vivipara	Germany	new_sh_in	79	k__Fungi;p__Basidiomycota;c__Agaricomycetes;o__Sebacinales	UCL8_007582	k__Fungi;p__Basidiomycota;c__Agaricomycetes;o__Sebacinales
8114_417	KF000645	Bistorta vivipara	Germany	new_sh_in	79	k__Fungi;p__Basidiomycota;c__Agaricomycetes;o__Sebacinales	UCL8_007582	k__Fungi;p__Basidiomycota;c__Agaricomycetes;o__Sebacinales
8114_418	KF000644	Bistorta vivipara	Germany	new_sh_in	79	k__Fungi;p__Basidiomycota;c__Agaricomycetes;o__Sebacinales	UCL8_007582	k__Fungi;p__Basidiomycota;c__Agaricomycetes;o__Sebacinales
8114_419	KF000643	Bistorta vivipara	Germany	new_sh_in	79	k__Fungi;p__Basidiomycota;c__Agaricomycetes;o__Sebacinales	UCL8_007582	k__Fungi;p__Basidiomycota;c__Agaricomycetes;o__Sebacinales
8114_423	KF000639	Bistorta vivipara	Germany	duplicate_of_KF000643	79	k__Fungi;p__Basidiomycota;c__Agaricomycetes;o__Sebacinales	UCL8_007582
8114_556	KF000506	Bistorta vivipara	Germany	duplicate_of_KF000643	79	k__Fungi;p__Basidiomycota;c__Agaricomycetes;o__Sebacinales	UCL8_007582
8114_564	KF000498	Bistorta vivipara	Germany	duplicate_of_KF000643	79	k__Fungi;p__Basidiomycota;c__Agaricomycetes;o__Sebacinales	UCL8_007582
8114_420	KF000642	Bistorta vivipara	Germany	present_in	SH1710877.08FU	k__Fungi;p__Ascomycota;c__Leotiomycetes;o__Helotiales;f__unidentified;g__unidentified;s__Helotiales_sp	UCL8_006055	k__Fungi;p__Ascomycota;c__Leotiomycetes;o__Helotiales
8114_421	KF000641	Bistorta vivipara	Germany	present_in	SH1731021.08FU	k__Fungi;p__Basidiomycota;c__Agaricomycetes;o__Sebacinales;f__Sebacinaceae;g__Sebacina;s__Sebacina_sp	UCL8_007582	k__Fungi;p__Basidiomycota;c__Agaricomycetes;o__Sebacinales
8114_422	KF000640	Bistorta vivipara	Germany	present_in	SH1710877.08FU	k__Fungi;p__Ascomycota;c__Leotiomycetes;o__Helotiales;f__unidentified;g__unidentified;s__Helotiales_sp	UCL8_006055	k__Fungi;p__Ascomycota;c__Leotiomycetes;o__Helotiales
8114_424	KF000638	Bistorta vivipara	Germany	new_sh_in	79	k__Fungi;p__Basidiomycota;c__Agaricomycetes;o__Sebacinales	UCL8_007582	k__Fungi;p__Basidiomycota;c__Agaricomycetes;o__Sebacinales
8114_425	KF000637	Bistorta vivipara	Germany	new_sh_in	79	k__Fungi;p__Basidiomycota;c__Agaricomycetes;o__Sebacinales	UCL8_007582	k__Fungi;p__Basidiomycota;c__Agaricomycetes;o__Sebacinales
8114_426	KF000636	Bistorta vivipara	Germany	new_sh_in	83	k__Fungi;p__Ascomycota;c__Pezizomycetes;o__Pezizales	UCL8_006043	k__Fungi;p__Ascomycota;c__Pezizomycetes;o__Pezizales
8114_427	KF000635	Bistorta vivipara	Germany	present_in	SH1731001.08FU	k__Fungi;p__Basidiomycota;c__Agaricomycetes;o__Sebacinales;f__Sebacinaceae;g__Sebacina;s__Sebacina_sp	UCL8_007582	k__Fungi;p__Basidiomycota;c__Agaricomycetes;o__Sebacinales
8114_428	KF000634	Bistorta vivipara	Germany	present_in	SH1731004.08FU	k__Fungi;p__Basidiomycota;c__Agaricomycetes;o__Sebacinales;f__Sebacinaceae;g__Sebacina;s__Sebacina_sp	UCL8_007582	k__Fungi;p__Basidiomycota;c__Agaricomycetes;o__Sebacinales
8114_430	KF000632	Bistorta vivipara	Germany	new_sh_in	83	k__Fungi;p__Ascomycota;c__Pezizomycetes;o__Pezizales	UCL8_006043	k__Fungi;p__Ascomycota;c__Pezizomycetes;o__Pezizales
8114_429	KF000633	Bistorta vivipara	Germany	present_in	SH1661293.08FU	k__Fungi;p__Basidiomycota;c__Agaricomycetes;o__Thelephorales;f__Thelephoraceae;g__unidentified;s__Thelephoraceae_sp	UCL8_000001	k__Fungi;p__Basidiomycota;c__Agaricomycetes;o__Thelephorales
8114_431	KF000631	Bistorta vivipara	Germany	new_sh_in	83	k__Fungi;p__Ascomycota;c__Pezizomycetes;o__Pezizales	UCL8_006043	k__Fungi;p__Ascomycota;c__Pezizomycetes;o__Pezizales
8114_432	KF000630	Bistorta vivipara	Germany	present_in	SH1690918.08FU	k__Fungi;p__Basidiomycota;c__Agaricomycetes;o__Thelephorales;f__Thelephoraceae;g__Tomentella;s__Tomentella_sp	UCL8_004608	k__Fungi;p__Basidiomycota;c__Agaricomycetes;o__Thelephorales
8114_433	KF000629	Bistorta vivipara	Germany	present_in	SH1707070.08FU	k__Fungi;p__Basidiomycota;c__Agaricomycetes;o__Agaricales;f__Inocybaceae;g__Inocybe;s__Inocybe_sp	UCL8_005558	k__Fungi;p__Basidiomycota;c__Agaricomycetes;o__Agaricales
8114_434	KF000628	Bistorta vivipara	Germany	duplicate_of_KF000629	SH1707070.08FU	k__Fungi;p__Basidiomycota;c__Agaricomycetes;o__Agaricales;f__Inocybaceae;g__Inocybe;s__Inocybe_sp	UCL8_005558
8114_436	KF000626	Bistorta vivipara	Germany	duplicate_of_KF000629	SH1707070.08FU	k__Fungi;p__Basidiomycota;c__Agaricomycetes;o__Agaricales;f__Inocybaceae;g__Inocybe;s__Inocybe_sp	UCL8_005558
8114_442	KF000620	Bistorta vivipara	Germany	duplicate_of_KF000629	SH1707070.08FU	k__Fungi;p__Basidiomycota;c__Agaricomycetes;o__Agaricales;f__Inocybaceae;g__Inocybe;s__Inocybe_sp	UCL8_005558
8114_435	KF000627	Bistorta vivipara	Germany	present_in	SH1660151.08FU	k__Fungi;p__Basidiomycota;c__Agaricomycetes;o__Thelephorales;f__Thelephoraceae;g__Tomentella;s__Tomentella_sp	UCL8_000001	k__Fungi;p__Basidiomycota;c__Agaricomycetes;o__Thelephorales
8114_437	KF000625	Bistorta vivipara	Germany	present_in	SH1707070.08FU	k__Fungi;p__Basidiomycota;c__Agaricomycetes;o__Agaricales;f__Inocybaceae;g__Inocybe;s__Inocybe_sp	UCL8_005558	k__Fungi;p__Basidiomycota;c__Agaricomycetes;o__Agaricales
8114_443	KF000619	Bistorta vivipara	Germany	duplicate_of_KF000625	SH1707070.08FU	k__Fungi;p__Basidiomycota;c__Agaricomycetes;o__Agaricales;f__Inocybaceae;g__Inocybe;s__Inocybe_sp	UCL8_005558
8114_438	KF000624	Bistorta vivipara	Germany	present_in	SH1834528.08FU	k__Fungi;p__Ascomycota;c__Pezizomycetes;o__Pezizales;f__Pezizaceae;g__unidentified;s__Pezizaceae_sp	UCL8_012532	k__Fungi;p__Ascomycota;c__Pezizomycetes;o__Pezizales
8114_439	KF000623	Bistorta vivipara	Germany	new_sh_in	84	k__Fungi;p__Basidiomycota;c__Agaricomycetes;o__Thelephorales	UCL8_000001	k__Fungi;p__Basidiomycota;c__Agaricomycetes;o__Thelephorales
8114_440	KF000622	Bistorta vivipara	Germany	present_in	SH1707070.08FU	k__Fungi;p__Basidiomycota;c__Agaricomycetes;o__Agaricales;f__Inocybaceae;g__Inocybe;s__Inocybe_sp	UCL8_005558	k__Fungi;p__Basidiomycota;c__Agaricomycetes;o__Agaricales
8114_441	KF000621	Bistorta vivipara	Germany	duplicate_of_KF000622	SH1707070.08FU	k__Fungi;p__Basidiomycota;c__Agaricomycetes;o__Agaricales;f__Inocybaceae;g__Inocybe;s__Inocybe_sp	UCL8_005558
8114_444	KF000618	Bistorta vivipara	Germany	duplicate_of_KF000622	SH1707070.08FU	k__Fungi;p__Basidiomycota;c__Agaricomycetes;o__Agaricales;f__Inocybaceae;g__Inocybe;s__Inocybe_sp	UCL8_005558
8114_446	KF000616	Bistorta vivipara	Germany	present_in	SH1690915.08FU	k__Fungi;p__Basidiomycota;c__Agaricomycetes;o__Thelephorales;f__Thelephoraceae;g__Tomentella;s__Tomentella_pilosa	UCL8_004608	k__Fungi;p__Basidiomycota;c__Agaricomycetes;o__Thelephorales
8114_445	KF000617	Bistorta vivipara	Germany	present_in	SH1690915.08FU	k__Fungi;p__Basidiomycota;c__Agaricomycetes;o__Thelephorales;f__Thelephoraceae;g__Tomentella;s__Tomentella_pilosa	UCL8_004608	k__Fungi;p__Basidiomycota;c__Agaricomycetes;o__Thelephorales
8114_447	KF000615	Bistorta vivipara	Germany	present_in	SH1686543.08FU	k__Fungi;p__Ascomycota;c__Pezizomycetes;o__Pezizales;f__Pyronemataceae;g__Trichophaea;s__Trichophaea_sp	UCL8_003903	k__Fungi;p__Ascomycota;c__Pezizomycetes;o__Pezizales
8114_448	KF000614	Bistorta vivipara	Germany	present_in	SH1731001.08FU	k__Fungi;p__Basidiomycota;c__Agaricomycetes;o__Sebacinales;f__Sebacinaceae;g__Sebacina;s__Sebacina_sp	UCL8_007582	k__Fungi;p__Basidiomycota;c__Agaricomycetes;o__Sebacinales
8114_449	KF000613	Bistorta vivipara	Germany	new_sh_in	83	k__Fungi;p__Ascomycota;c__Pezizomycetes;o__Pezizales	UCL8_006043	k__Fungi;p__Ascomycota;c__Pezizomycetes;o__Pezizales
8114_450	KF000612	Bistorta vivipara	Germany	present_in	SH1685205.08FU	k__Fungi;p__Ascomycota;c__Leotiomycetes;o__Helotiales;f__Hyaloscyphaceae;g__Hyaloscypha;s__Hyaloscypha_sp	UCL8_003736	k__Fungi;p__Ascomycota;c__Leotiomycetes;o__Helotiales
8114_451	KF000611	Bistorta vivipara	Germany	present_in	SH1677362.08FU	k__Fungi;p__Ascomycota;c__Pezizomycetes;o__Pezizales;f__Pyronemataceae;g__Trichophaea;s__Trichophaea_sp	UCL8_002400	k__Fungi;p__Ascomycota;c__Pezizomycetes;o__Pezizales
8114_452	KF000610	Bistorta vivipara	Germany	present_in	SH1731033.08FU	k__Fungi;p__Basidiomycota;c__Agaricomycetes;o__Sebacinales;f__Sebacinaceae;g__Sebacina;s__Sebacina_sp	UCL8_007582	k__Fungi;p__Basidiomycota;c__Agaricomycetes;o__Sebacinales
8114_453	KF000609	Bistorta vivipara	Germany	present_in	SH1731004.08FU	k__Fungi;p__Basidiomycota;c__Agaricomycetes;o__Sebacinales;f__Sebacinaceae;g__Sebacina;s__Sebacina_sp	UCL8_007582	k__Fungi;p__Basidiomycota;c__Agaricomycetes;o__Sebacinales
8114_454	KF000608	Bistorta vivipara	Germany	present_in	SH1731234.08FU	k__Fungi;p__Basidiomycota;c__Agaricomycetes;o__Sebacinales;f__Sebacinaceae;g__Sebacina;s__Sebacina_sp	UCL8_007582	k__Fungi;p__Basidiomycota;c__Agaricomycetes;o__Sebacinales
8114_456	KF000606	Bistorta vivipara	Germany	present_in	SH1677362.08FU	k__Fungi;p__Ascomycota;c__Pezizomycetes;o__Pezizales;f__Pyronemataceae;g__Trichophaea;s__Trichophaea_sp	UCL8_002400	k__Fungi;p__Ascomycota;c__Pezizomycetes;o__Pezizales
8114_455	KF000607	Bistorta vivipara	Germany	new_sh_in	81	k__Fungi;p__Basidiomycota;c__Agaricomycetes;o__Thelephorales	UCL8_000001	k__Fungi;p__Basidiomycota;c__Agaricomycetes;o__Thelephorales
8114_458	KF000604	Bistorta vivipara	Germany	present_in	SH1686543.08FU	k__Fungi;p__Ascomycota;c__Pezizomycetes;o__Pezizales;f__Pyronemataceae;g__Trichophaea;s__Trichophaea_sp	UCL8_003903	k__Fungi;p__Ascomycota;c__Pezizomycetes;o__Pezizales
8114_457	KF000605	Bistorta vivipara	Germany	present_in	SH1731004.08FU	k__Fungi;p__Basidiomycota;c__Agaricomycetes;o__Sebacinales;f__Sebacinaceae;g__Sebacina;s__Sebacina_sp	UCL8_007582	k__Fungi;p__Basidiomycota;c__Agaricomycetes;o__Sebacinales
8114_460	KF000602	Bistorta vivipara	Germany	present_in	SH1731013.08FU	k__Fungi;p__Basidiomycota;c__Agaricomycetes;o__Sebacinales;f__Sebacinaceae;g__Sebacina;s__Sebacina_sp	UCL8_007582	k__Fungi;p__Basidiomycota;c__Agaricomycetes;o__Sebacinales
8114_459	KF000603	Bistorta vivipara	Germany	new_sh_in	79	k__Fungi;p__Basidiomycota;c__Agaricomycetes;o__Sebacinales	UCL8_007582	k__Fungi;p__Basidiomycota;c__Agaricomycetes;o__Sebacinales
8114_461	KF000601	Bistorta vivipara	Germany	present_in	SH1731013.08FU	k__Fungi;p__Basidiomycota;c__Agaricomycetes;o__Sebacinales;f__Sebacinaceae;g__Sebacina;s__Sebacina_sp	UCL8_007582	k__Fungi;p__Basidiomycota;c__Agaricomycetes;o__Sebacinales
8114_462	KF000600	Bistorta vivipara	Germany	present_in	SH1731013.08FU	k__Fungi;p__Basidiomycota;c__Agaricomycetes;o__Sebacinales;f__Sebacinaceae;g__Sebacina;s__Sebacina_sp	UCL8_007582	k__Fungi;p__Basidiomycota;c__Agaricomycetes;o__Sebacinales
8114_464	KF000598	Bistorta vivipara	Germany	present_in	SH1731001.08FU	k__Fungi;p__Basidiomycota;c__Agaricomycetes;o__Sebacinales;f__Sebacinaceae;g__Sebacina;s__Sebacina_sp	UCL8_007582	k__Fungi;p__Basidiomycota;c__Agaricomycetes;o__Sebacinales
8114_463	KF000599	Bistorta vivipara	Germany	new_sh_in	81	k__Fungi;p__Basidiomycota;c__Agaricomycetes;o__Thelephorales	UCL8_000001	k__Fungi;p__Basidiomycota;c__Agaricomycetes;o__Thelephorales
8114_466	KF000596	Bistorta vivipara	Germany	present_in	SH1731004.08FU	k__Fungi;p__Basidiomycota;c__Agaricomycetes;o__Sebacinales;f__Sebacinaceae;g__Sebacina;s__Sebacina_sp	UCL8_007582	k__Fungi;p__Basidiomycota;c__Agaricomycetes;o__Sebacinales
8114_490	KF000572	Bistorta vivipara	Germany	duplicate_of_KF000596	SH1731004.08FU	k__Fungi;p__Basidiomycota;c__Agaricomycetes;o__Sebacinales;f__Sebacinaceae;g__Sebacina;s__Sebacina_sp	UCL8_007582
8114_465	KF000597	Bistorta vivipara	Germany	present_in	SH1690932.08FU	k__Fungi;p__Basidiomycota;c__Agaricomycetes;o__Thelephorales;f__Thelephoraceae;g__Tomentella;s__Tomentella_sp	UCL8_004608	k__Fungi;p__Basidiomycota;c__Agaricomycetes;o__Thelephorales
8114_468	KF000594	Bistorta vivipara	Germany	present_in	SH1731021.08FU	k__Fungi;p__Basidiomycota;c__Agaricomycetes;o__Sebacinales;f__Sebacinaceae;g__Sebacina;s__Sebacina_sp	UCL8_007582	k__Fungi;p__Basidiomycota;c__Agaricomycetes;o__Sebacinales
8114_467	KF000595	Bistorta vivipara	Germany	present_in	SH1690920.08FU	k__Fungi;p__Basidiomycota;c__Agaricomycetes;o__Thelephorales;f__Thelephoraceae;g__Tomentella;s__Tomentella_lapida	UCL8_004608	k__Fungi;p__Basidiomycota;c__Agaricomycetes;o__Thelephorales
8114_469	KF000593	Bistorta vivipara	Germany	present_in	SH1731015.08FU	k__Fungi;p__Basidiomycota;c__Agaricomycetes;o__Sebacinales;f__Sebacinaceae;g__Sebacina;s__Sebacina_sp	UCL8_007582	k__Fungi;p__Basidiomycota;c__Agaricomycetes;o__Sebacinales
8114_470	KF000592	Bistorta vivipara	Germany	present_in	SH1660151.08FU	k__Fungi;p__Basidiomycota;c__Agaricomycetes;o__Thelephorales;f__Thelephoraceae;g__Tomentella;s__Tomentella_sp	UCL8_000001	k__Fungi;p__Basidiomycota;c__Agaricomycetes;o__Thelephorales
8114_471	KF000591	Bistorta vivipara	Germany	present_in	SH1672831.08FU	k__Fungi;p__Basidiomycota;c__Agaricomycetes;o__Sebacinales;f__Sebacinaceae;g__Sebacina;s__Sebacina_sp	UCL8_001587	k__Fungi;p__Basidiomycota;c__Agaricomycetes;o__Sebacinales
8114_472	KF000590	Bistorta vivipara	Germany	present_in	SH1690920.08FU	k__Fungi;p__Basidiomycota;c__Agaricomycetes;o__Thelephorales;f__Thelephoraceae;g__Tomentella;s__Tomentella_lapida	UCL8_004608	k__Fungi;p__Basidiomycota;c__Agaricomycetes;o__Thelephorales
8114_473	KF000589	Bistorta vivipara	Germany	present_in	SH1690915.08FU	k__Fungi;p__Basidiomycota;c__Agaricomycetes;o__Thelephorales;f__Thelephoraceae;g__Tomentella;s__Tomentella_pilosa	UCL8_004608	k__Fungi;p__Basidiomycota;c__Agaricomycetes;o__Thelephorales
8114_474	KF000588	Bistorta vivipara	Germany	present_in	SH1690915.08FU	k__Fungi;p__Basidiomycota;c__Agaricomycetes;o__Thelephorales;f__Thelephoraceae;g__Tomentella;s__Tomentella_pilosa	UCL8_004608	k__Fungi;p__Basidiomycota;c__Agaricomycetes;o__Thelephorales
8114_475	KF000587	Bistorta vivipara	Germany	new_sh_in	83	k__Fungi;p__Ascomycota;c__Pezizomycetes;o__Pezizales	UCL8_006043	k__Fungi;p__Ascomycota;c__Pezizomycetes;o__Pezizales
8114_476	KF000586	Bistorta vivipara	Germany	new_sh_in	83	k__Fungi;p__Ascomycota;c__Pezizomycetes;o__Pezizales	UCL8_006043	k__Fungi;p__Ascomycota;c__Pezizomycetes;o__Pezizales
8114_477	KF000585	Bistorta vivipara	Germany	new_sh_in	83	k__Fungi;p__Ascomycota;c__Pezizomycetes;o__Pezizales	UCL8_006043	k__Fungi;p__Ascomycota;c__Pezizomycetes;o__Pezizales
8114_478	KF000584	Bistorta vivipara	Germany	present_in	SH1690915.08FU	k__Fungi;p__Basidiomycota;c__Agaricomycetes;o__Thelephorales;f__Thelephoraceae;g__Tomentella;s__Tomentella_pilosa	UCL8_004608	k__Fungi;p__Basidiomycota;c__Agaricomycetes;o__Thelephorales
8114_479	KF000583	Bistorta vivipara	Germany	present_in	SH1690915.08FU	k__Fungi;p__Basidiomycota;c__Agaricomycetes;o__Thelephorales;f__Thelephoraceae;g__Tomentella;s__Tomentella_pilosa	UCL8_004608	k__Fungi;p__Basidiomycota;c__Agaricomycetes;o__Thelephorales
8114_480	KF000582	Bistorta vivipara	Germany	present_in	SH1690915.08FU	k__Fungi;p__Basidiomycota;c__Agaricomycetes;o__Thelephorales;f__Thelephoraceae;g__Tomentella;s__Tomentella_pilosa	UCL8_004608	k__Fungi;p__Basidiomycota;c__Agaricomycetes;o__Thelephorales
8114_481	KF000581	Bistorta vivipara	Germany	present_in	SH1731007.08FU	k__Fungi;p__Basidiomycota;c__Agaricomycetes;o__Sebacinales;f__Sebacinaceae;g__Sebacina;s__Sebacina_flagelliformis	UCL8_007582	k__Fungi;p__Basidiomycota;c__Agaricomycetes;o__Sebacinales
8114_482	KF000580	Bistorta vivipara	Germany	present_in	SH1731007.08FU	k__Fungi;p__Basidiomycota;c__Agaricomycetes;o__Sebacinales;f__Sebacinaceae;g__Sebacina;s__Sebacina_flagelliformis	UCL8_007582	k__Fungi;p__Basidiomycota;c__Agaricomycetes;o__Sebacinales
8114_484	KF000578	Bistorta vivipara	Germany	duplicate_of_KF000580	SH1731007.08FU	k__Fungi;p__Basidiomycota;c__Agaricomycetes;o__Sebacinales;f__Sebacinaceae;g__Sebacina;s__Sebacina_flagelliformis	UCL8_007582
8114_483	KF000579	Bistorta vivipara	Germany	present_in	SH1731007.08FU	k__Fungi;p__Basidiomycota;c__Agaricomycetes;o__Sebacinales;f__Sebacinaceae;g__Sebacina;s__Sebacina_flagelliformis	UCL8_007582	k__Fungi;p__Basidiomycota;c__Agaricomycetes;o__Sebacinales
8114_485	KF000577	Bistorta vivipara	Germany	present_in	SH1731007.08FU	k__Fungi;p__Basidiomycota;c__Agaricomycetes;o__Sebacinales;f__Sebacinaceae;g__Sebacina;s__Sebacina_flagelliformis	UCL8_007582	k__Fungi;p__Basidiomycota;c__Agaricomycetes;o__Sebacinales
8114_486	KF000576	Bistorta vivipara	Germany	present_in	SH1731007.08FU	k__Fungi;p__Basidiomycota;c__Agaricomycetes;o__Sebacinales;f__Sebacinaceae;g__Sebacina;s__Sebacina_flagelliformis	UCL8_007582	k__Fungi;p__Basidiomycota;c__Agaricomycetes;o__Sebacinales
8114_487	KF000575	Bistorta vivipara	Germany	present_in	SH1800251.08FU	k__Fungi;p__Basidiomycota;c__Agaricomycetes;o__Sebacinales;f__Sebacinaceae;g__Sebacina;s__Sebacina_incrustans	UCL8_010859	k__Fungi;p__Basidiomycota;c__Agaricomycetes;o__Sebacinales
8114_488	KF000574	Bistorta vivipara	Germany	present_in	SH1800251.08FU	k__Fungi;p__Basidiomycota;c__Agaricomycetes;o__Sebacinales;f__Sebacinaceae;g__Sebacina;s__Sebacina_incrustans	UCL8_010859	k__Fungi;p__Basidiomycota;c__Agaricomycetes;o__Sebacinales
8114_489	KF000573	Bistorta vivipara	Germany	new_sh_in	81	k__Fungi;p__Basidiomycota;c__Agaricomycetes;o__Thelephorales	UCL8_000001	k__Fungi;p__Basidiomycota;c__Agaricomycetes;o__Thelephorales
8114_491	KF000571	Bistorta vivipara	Germany	present_in	SH1731004.08FU	k__Fungi;p__Basidiomycota;c__Agaricomycetes;o__Sebacinales;f__Sebacinaceae;g__Sebacina;s__Sebacina_sp	UCL8_007582	k__Fungi;p__Basidiomycota;c__Agaricomycetes;o__Sebacinales
8114_492	KF000570	Bistorta vivipara	Germany	present_in	SH1731013.08FU	k__Fungi;p__Basidiomycota;c__Agaricomycetes;o__Sebacinales;f__Sebacinaceae;g__Sebacina;s__Sebacina_sp	UCL8_007582	k__Fungi;p__Basidiomycota;c__Agaricomycetes;o__Sebacinales
8114_493	KF000569	Bistorta vivipara	Germany	new_sh_in	81	k__Fungi;p__Basidiomycota;c__Agaricomycetes;o__Thelephorales	UCL8_000001	k__Fungi;p__Basidiomycota;c__Agaricomycetes;o__Thelephorales
8114_494	KF000568	Bistorta vivipara	Germany	new_sh_in	79	k__Fungi;p__Basidiomycota;c__Agaricomycetes;o__Sebacinales	UCL8_007582	k__Fungi;p__Basidiomycota;c__Agaricomycetes;o__Sebacinales
8114_495	KF000567	Bistorta vivipara	Germany	new_sh_in	81	k__Fungi;p__Basidiomycota;c__Agaricomycetes;o__Thelephorales	UCL8_000001	k__Fungi;p__Basidiomycota;c__Agaricomycetes;o__Thelephorales
8114_496	KF000566	Bistorta vivipara	Germany	new_sh_in	81	k__Fungi;p__Basidiomycota;c__Agaricomycetes;o__Thelephorales	UCL8_000001	k__Fungi;p__Basidiomycota;c__Agaricomycetes;o__Thelephorales
8114_497	KF000565	Bistorta vivipara	Germany	new_sh_in	83	k__Fungi;p__Ascomycota;c__Pezizomycetes;o__Pezizales	UCL8_006043	k__Fungi;p__Ascomycota;c__Pezizomycetes;o__Pezizales
8114_498	KF000564	Bistorta vivipara	Germany	present_in	SH1691162.08FU	k__Fungi;p__Basidiomycota;c__Agaricomycetes;o__Thelephorales;f__Thelephoraceae;g__Tomentella;s__Tomentella_sp	UCL8_004608	k__Fungi;p__Basidiomycota;c__Agaricomycetes;o__Thelephorales
8114_499	KF000563	Bistorta vivipara	Germany	present_in	SH1659889.08FU	k__Fungi;p__Basidiomycota;c__Agaricomycetes;o__Thelephorales;f__Thelephoraceae;g__Tomentella;s__Tomentella_sp	UCL8_000001	k__Fungi;p__Basidiomycota;c__Agaricomycetes;o__Thelephorales
8114_500	KF000562	Bistorta vivipara	Germany	present_in	SH1686543.08FU	k__Fungi;p__Ascomycota;c__Pezizomycetes;o__Pezizales;f__Pyronemataceae;g__Trichophaea;s__Trichophaea_sp	UCL8_003903	k__Fungi;p__Ascomycota;c__Pezizomycetes;o__Pezizales
8114_501	KF000561	Bistorta vivipara	Germany	present_in	SH1672840.08FU	k__Fungi;p__Basidiomycota;c__Agaricomycetes;o__Sebacinales;f__Sebacinaceae;g__Sebacina;s__Sebacina_epigaea	UCL8_001587	k__Fungi;p__Basidiomycota;c__Agaricomycetes;o__Sebacinales
8114_502	KF000560	Bistorta vivipara	Germany	new_sh_in	78	k__Fungi;p__Basidiomycota;c__Agaricomycetes;o__Thelephorales	UCL8_000001	k__Fungi;p__Basidiomycota;c__Agaricomycetes;o__Thelephorales
8114_503	KF000559	Bistorta vivipara	Germany	present_in	SH1731026.08FU	k__Fungi;p__Basidiomycota;c__Agaricomycetes;o__Sebacinales;f__Sebacinaceae;g__Sebacina;s__Sebacina_sp	UCL8_007582	k__Fungi;p__Basidiomycota;c__Agaricomycetes;o__Sebacinales
8114_504	KF000558	Bistorta vivipara	Germany	new_sh_in	78	k__Fungi;p__Basidiomycota;c__Agaricomycetes;o__Thelephorales	UCL8_000001	k__Fungi;p__Basidiomycota;c__Agaricomycetes;o__Thelephorales
8114_505	KF000557	Bistorta vivipara	Germany	new_sh_in	78	k__Fungi;p__Basidiomycota;c__Agaricomycetes;o__Thelephorales	UCL8_000001	k__Fungi;p__Basidiomycota;c__Agaricomycetes;o__Thelephorales
8114_506	KF000556	Bistorta vivipara	Germany	present_in	SH1686543.08FU	k__Fungi;p__Ascomycota;c__Pezizomycetes;o__Pezizales;f__Pyronemataceae;g__Trichophaea;s__Trichophaea_sp	UCL8_003903	k__Fungi;p__Ascomycota;c__Pezizomycetes;o__Pezizales
8114_507	KF000555	Bistorta vivipara	Germany	new_sh_in	78	k__Fungi;p__Basidiomycota;c__Agaricomycetes;o__Thelephorales	UCL8_000001	k__Fungi;p__Basidiomycota;c__Agaricomycetes;o__Thelephorales
8114_508	KF000554	Bistorta vivipara	Germany	present_in	SH1686543.08FU	k__Fungi;p__Ascomycota;c__Pezizomycetes;o__Pezizales;f__Pyronemataceae;g__Trichophaea;s__Trichophaea_sp	UCL8_003903	k__Fungi;p__Ascomycota;c__Pezizomycetes;o__Pezizales
8114_509	KF000553	Bistorta vivipara	Germany	present_in	SH1686543.08FU	k__Fungi;p__Ascomycota;c__Pezizomycetes;o__Pezizales;f__Pyronemataceae;g__Trichophaea;s__Trichophaea_sp	UCL8_003903	k__Fungi;p__Ascomycota;c__Pezizomycetes;o__Pezizales
8114_510	KF000552	Bistorta vivipara	Germany	new_sh_in	78	k__Fungi;p__Basidiomycota;c__Agaricomycetes;o__Thelephorales	UCL8_000001	k__Fungi;p__Basidiomycota;c__Agaricomycetes;o__Thelephorales
8114_511	KF000551	Bistorta vivipara	Germany	present_in	SH1731026.08FU	k__Fungi;p__Basidiomycota;c__Agaricomycetes;o__Sebacinales;f__Sebacinaceae;g__Sebacina;s__Sebacina_sp	UCL8_007582	k__Fungi;p__Basidiomycota;c__Agaricomycetes;o__Sebacinales
8114_512	KF000550	Bistorta vivipara	Germany	present_in	SH1690915.08FU	k__Fungi;p__Basidiomycota;c__Agaricomycetes;o__Thelephorales;f__Thelephoraceae;g__Tomentella;s__Tomentella_pilosa	UCL8_004608	k__Fungi;p__Basidiomycota;c__Agaricomycetes;o__Thelephorales
8114_513	KF000549	Bistorta vivipara	Germany	new_sh_in	78	k__Fungi;p__Basidiomycota;c__Agaricomycetes;o__Thelephorales	UCL8_000001	k__Fungi;p__Basidiomycota;c__Agaricomycetes;o__Thelephorales
8114_514	KF000548	Bistorta vivipara	Germany	new_sh_in	78	k__Fungi;p__Basidiomycota;c__Agaricomycetes;o__Thelephorales	UCL8_000001	k__Fungi;p__Basidiomycota;c__Agaricomycetes;o__Thelephorales
8114_515	KF000547	Bistorta vivipara	Germany	new_sh_in	78	k__Fungi;p__Basidiomycota;c__Agaricomycetes;o__Thelephorales	UCL8_000001	k__Fungi;p__Basidiomycota;c__Agaricomycetes;o__Thelephorales
8114_516	KF000546	Bistorta vivipara	Germany	new_sh_in	85	k__Fungi;p__Ascomycota;c__Pezizomycetes;o__Pezizales	UCL8_004993	k__Fungi;p__Ascomycota;c__Pezizomycetes;o__Pezizales
8114_517	KF000545	Bistorta vivipara	Germany	new_sh_in	78	k__Fungi;p__Basidiomycota;c__Agaricomycetes;o__Thelephorales	UCL8_000001	k__Fungi;p__Basidiomycota;c__Agaricomycetes;o__Thelephorales
8114_518	KF000544	Bistorta vivipara	Germany	new_sh_in	80	k__Fungi;p__Basidiomycota;c__Agaricomycetes;o__Thelephorales	UCL8_000001	k__Fungi;p__Basidiomycota;c__Agaricomycetes;o__Thelephorales
8114_519	KF000543	Bistorta vivipara	Germany	present_in	SH1731021.08FU	k__Fungi;p__Basidiomycota;c__Agaricomycetes;o__Sebacinales;f__Sebacinaceae;g__Sebacina;s__Sebacina_sp	UCL8_007582	k__Fungi;p__Basidiomycota;c__Agaricomycetes;o__Sebacinales
8114_526	KF000536	Bistorta vivipara	Germany	duplicate_of_KF000543	SH1731021.08FU	k__Fungi;p__Basidiomycota;c__Agaricomycetes;o__Sebacinales;f__Sebacinaceae;g__Sebacina;s__Sebacina_sp	UCL8_007582
8114_520	KF000542	Bistorta vivipara	Germany	new_sh_in	80	k__Fungi;p__Basidiomycota;c__Agaricomycetes;o__Thelephorales	UCL8_000001	k__Fungi;p__Basidiomycota;c__Agaricomycetes;o__Thelephorales
8114_521	KF000541	Bistorta vivipara	Germany	present_in	SH1690915.08FU	k__Fungi;p__Basidiomycota;c__Agaricomycetes;o__Thelephorales;f__Thelephoraceae;g__Tomentella;s__Tomentella_pilosa	UCL8_004608	k__Fungi;p__Basidiomycota;c__Agaricomycetes;o__Thelephorales
8114_522	KF000540	Bistorta vivipara	Germany	new_sh_in	78	k__Fungi;p__Basidiomycota;c__Agaricomycetes;o__Thelephorales	UCL8_000001	k__Fungi;p__Basidiomycota;c__Agaricomycetes;o__Thelephorales
8114_523	KF000539	Bistorta vivipara	Germany	present_in	SH1682213.08FU	k__Fungi;p__Basidiomycota;c__Agaricomycetes;o__Sebacinales;f__Sebacinaceae;g__Sebacina;s__Sebacina_sp	UCL8_003407	k__Fungi;p__Basidiomycota;c__Agaricomycetes;o__Sebacinales
8114_524	KF000538	Bistorta vivipara	Germany	present_in	SH1660788.08FU	k__Fungi;p__Basidiomycota;c__Agaricomycetes;o__Thelephorales;f__Thelephoraceae;g__unidentified;s__Thelephoraceae_sp	UCL8_000001	k__Fungi;p__Basidiomycota;c__Agaricomycetes;o__Thelephorales
8114_525	KF000537	Bistorta vivipara	Germany	present_in	SH1731021.08FU	k__Fungi;p__Basidiomycota;c__Agaricomycetes;o__Sebacinales;f__Sebacinaceae;g__Sebacina;s__Sebacina_sp	UCL8_007582	k__Fungi;p__Basidiomycota;c__Agaricomycetes;o__Sebacinales
8114_527	KF000535	Bistorta vivipara	Germany	new_sh_in	80	k__Fungi;p__Basidiomycota;c__Agaricomycetes;o__Thelephorales	UCL8_000001	k__Fungi;p__Basidiomycota;c__Agaricomycetes;o__Thelephorales
8114_528	KF000534	Bistorta vivipara	Germany	new_sh_in	80	k__Fungi;p__Basidiomycota;c__Agaricomycetes;o__Thelephorales	UCL8_000001	k__Fungi;p__Basidiomycota;c__Agaricomycetes;o__Thelephorales
8114_529	KF000533	Bistorta vivipara	Germany	new_sh_in	83	k__Fungi;p__Ascomycota;c__Pezizomycetes;o__Pezizales	UCL8_006043	k__Fungi;p__Ascomycota;c__Pezizomycetes;o__Pezizales
8114_530	KF000532	Bistorta vivipara	Germany	present_in	SH1708965.08FU	k__Fungi;p__Ascomycota;c__Leotiomycetes;o__Helotiales;f__unidentified;g__unidentified;s__Helotiales_sp	UCL8_005813	k__Fungi;p__Ascomycota;c__Leotiomycetes;o__Helotiales
8114_532	KF000530	Bistorta vivipara	Germany	new_sh_in	86	k__Fungi;p__Basidiomycota;c__Agaricomycetes;o__Thelephorales	UCL8_000001	k__Fungi;p__Basidiomycota;c__Agaricomycetes;o__Thelephorales
8114_531	KF000531	Bistorta vivipara	Germany	new_sh_in	86	k__Fungi;p__Basidiomycota;c__Agaricomycetes;o__Thelephorales	UCL8_000001	k__Fungi;p__Basidiomycota;c__Agaricomycetes;o__Thelephorales
8114_534	KF000528	Bistorta vivipara	Germany	present_in	SH1731013.08FU	k__Fungi;p__Basidiomycota;c__Agaricomycetes;o__Sebacinales;f__Sebacinaceae;g__Sebacina;s__Sebacina_sp	UCL8_007582	k__Fungi;p__Basidiomycota;c__Agaricomycetes;o__Sebacinales
8114_533	KF000529	Bistorta vivipara	Germany	present_in	SH1731013.08FU	k__Fungi;p__Basidiomycota;c__Agaricomycetes;o__Sebacinales;f__Sebacinaceae;g__Sebacina;s__Sebacina_sp	UCL8_007582	k__Fungi;p__Basidiomycota;c__Agaricomycetes;o__Sebacinales
8114_535	KF000527	Bistorta vivipara	Germany	present_in	SH1731013.08FU	k__Fungi;p__Basidiomycota;c__Agaricomycetes;o__Sebacinales;f__Sebacinaceae;g__Sebacina;s__Sebacina_sp	UCL8_007582	k__Fungi;p__Basidiomycota;c__Agaricomycetes;o__Sebacinales
8114_536	KF000526	Bistorta vivipara	Germany	present_in	SH1660516.08FU	k__Fungi;p__Basidiomycota;c__Agaricomycetes;o__Thelephorales;f__Thelephoraceae;g__unidentified;s__Thelephoraceae_sp	UCL8_000001	k__Fungi;p__Basidiomycota;c__Agaricomycetes;o__Thelephorales
8114_537	KF000525	Bistorta vivipara	Germany	new_sh_in	87	k__Fungi;p__Ascomycota;c__Sordariomycetes;o__Sordariales	UCL8_010885	k__Fungi;p__Ascomycota;c__Sordariomycetes;o__Sordariales
8114_538	KF000524	Bistorta vivipara	Germany	present_in	SH1731013.08FU	k__Fungi;p__Basidiomycota;c__Agaricomycetes;o__Sebacinales;f__Sebacinaceae;g__Sebacina;s__Sebacina_sp	UCL8_007582	k__Fungi;p__Basidiomycota;c__Agaricomycetes;o__Sebacinales
8114_539	KF000523	Bistorta vivipara	Germany	new_sh_in	82	k__Fungi;p__Basidiomycota;c__Agaricomycetes;o__Agaricales	UCL8_006215	k__Fungi;p__Basidiomycota;c__Agaricomycetes;o__Agaricales
8114_540	KF000522	Bistorta vivipara	Germany	present_in	SH1659889.08FU	k__Fungi;p__Basidiomycota;c__Agaricomycetes;o__Thelephorales;f__Thelephoraceae;g__Tomentella;s__Tomentella_sp	UCL8_000001	k__Fungi;p__Basidiomycota;c__Agaricomycetes;o__Thelephorales
8114_541	KF000521	Bistorta vivipara	Germany	new_sh_in	83	k__Fungi;p__Ascomycota;c__Pezizomycetes;o__Pezizales	UCL8_006043	k__Fungi;p__Ascomycota;c__Pezizomycetes;o__Pezizales
8114_542	KF000520	Bistorta vivipara	Germany	present_in	SH1690958.08FU	k__Fungi;p__Basidiomycota;c__Agaricomycetes;o__Thelephorales;f__Thelephoraceae;g__unidentified;s__Thelephoraceae_sp	UCL8_004608	k__Fungi;p__Basidiomycota;c__Agaricomycetes;o__Thelephorales
8114_543	KF000519	Bistorta vivipara	Germany	present_in	SH1690958.08FU	k__Fungi;p__Basidiomycota;c__Agaricomycetes;o__Thelephorales;f__Thelephoraceae;g__unidentified;s__Thelephoraceae_sp	UCL8_004608	k__Fungi;p__Basidiomycota;c__Agaricomycetes;o__Thelephorales
8114_544	KF000518	Bistorta vivipara	Germany	present_in	SH1660658.08FU	k__Fungi;p__Basidiomycota;c__Agaricomycetes;o__Thelephorales;f__Thelephoraceae;g__unidentified;s__Thelephoraceae_sp	UCL8_000001	k__Fungi;p__Basidiomycota;c__Agaricomycetes;o__Thelephorales
8114_545	KF000517	Bistorta vivipara	Germany	new_sh_in	83	k__Fungi;p__Ascomycota;c__Pezizomycetes;o__Pezizales	UCL8_006043	k__Fungi;p__Ascomycota;c__Pezizomycetes;o__Pezizales
8114_546	KF000516	Bistorta vivipara	Germany	new_sh_in	79	k__Fungi;p__Basidiomycota;c__Agaricomycetes;o__Sebacinales	UCL8_007582	k__Fungi;p__Basidiomycota;c__Agaricomycetes;o__Sebacinales
8114_595	KF000467	Bistorta vivipara	Germany	duplicate_of_KF000516	79	k__Fungi;p__Basidiomycota;c__Agaricomycetes;o__Sebacinales	UCL8_007582
8114_547	KF000515	Bistorta vivipara	Germany	present_in	SH1690915.08FU	k__Fungi;p__Basidiomycota;c__Agaricomycetes;o__Thelephorales;f__Thelephoraceae;g__Tomentella;s__Tomentella_pilosa	UCL8_004608	k__Fungi;p__Basidiomycota;c__Agaricomycetes;o__Thelephorales
8114_548	KF000514	Bistorta vivipara	Germany	present_in	SH1690958.08FU	k__Fungi;p__Basidiomycota;c__Agaricomycetes;o__Thelephorales;f__Thelephoraceae;g__unidentified;s__Thelephoraceae_sp	UCL8_004608	k__Fungi;p__Basidiomycota;c__Agaricomycetes;o__Thelephorales
8114_549	KF000513	Bistorta vivipara	Germany	present_in	SH1710952.08FU	k__Fungi;p__Ascomycota;c__Leotiomycetes;o__Helotiales;f__unidentified;g__unidentified;s__Helotiales_sp	UCL8_006055	k__Fungi;p__Ascomycota;c__Leotiomycetes;o__Helotiales
8114_550	KF000512	Bistorta vivipara	Germany	present_in	SH1710952.08FU	k__Fungi;p__Ascomycota;c__Leotiomycetes;o__Helotiales;f__unidentified;g__unidentified;s__Helotiales_sp	UCL8_006055	k__Fungi;p__Ascomycota;c__Leotiomycetes;o__Helotiales
8114_551	KF000511	Bistorta vivipara	Germany	present_in	SH1659889.08FU	k__Fungi;p__Basidiomycota;c__Agaricomycetes;o__Thelephorales;f__Thelephoraceae;g__Tomentella;s__Tomentella_sp	UCL8_000001	k__Fungi;p__Basidiomycota;c__Agaricomycetes;o__Thelephorales
8114_552	KF000510	Bistorta vivipara	Germany	new_sh_in	88	k__Fungi;p__Ascomycota;c__Leotiomycetes;o__Helotiales	UCL8_003621	k__Fungi;p__Ascomycota;c__Leotiomycetes;o__Helotiales
8114_553	KF000509	Bistorta vivipara	Germany	new_sh_in	79	k__Fungi;p__Basidiomycota;c__Agaricomycetes;o__Sebacinales	UCL8_007582	k__Fungi;p__Basidiomycota;c__Agaricomycetes;o__Sebacinales
8114_554	KF000508	Bistorta vivipara	Germany	present_in	SH1681115.08FU	k__Fungi;p__Basidiomycota;c__Agaricomycetes;o__Agaricales;f__Tricholomataceae;g__Tricholoma;s__Tricholoma_batschii	UCL8_003202	k__Fungi;p__Basidiomycota;c__Agaricomycetes;o__Agaricales
8114_555	KF000507	Bistorta vivipara	Germany	new_sh_in	79	k__Fungi;p__Basidiomycota;c__Agaricomycetes;o__Sebacinales	UCL8_007582	k__Fungi;p__Basidiomycota;c__Agaricomycetes;o__Sebacinales
8114_559	KF000503	Bistorta vivipara	Germany	duplicate_of_KF000507	79	k__Fungi;p__Basidiomycota;c__Agaricomycetes;o__Sebacinales	UCL8_007582
8114_565	KF000497	Bistorta vivipara	Germany	duplicate_of_KF000507	79	k__Fungi;p__Basidiomycota;c__Agaricomycetes;o__Sebacinales	UCL8_007582
8114_557	KF000505	Bistorta vivipara	Germany	new_sh_in	79	k__Fungi;p__Basidiomycota;c__Agaricomycetes;o__Sebacinales	UCL8_007582	k__Fungi;p__Basidiomycota;c__Agaricomycetes;o__Sebacinales
8114_558	KF000504	Bistorta vivipara	Germany	new_sh_in	79	k__Fungi;p__Basidiomycota;c__Agaricomycetes;o__Sebacinales	UCL8_007582	k__Fungi;p__Basidiomycota;c__Agaricomycetes;o__Sebacinales
8114_560	KF000502	Bistorta vivipara	Germany	new_sh_in	79	k__Fungi;p__Basidiomycota;c__Agaricomycetes;o__Sebacinales	UCL8_007582	k__Fungi;p__Basidiomycota;c__Agaricomycetes;o__Sebacinales
8114_561	KF000501	Bistorta vivipara	Germany	new_sh_in	79	k__Fungi;p__Basidiomycota;c__Agaricomycetes;o__Sebacinales	UCL8_007582	k__Fungi;p__Basidiomycota;c__Agaricomycetes;o__Sebacinales
8114_562	KF000500	Bistorta vivipara	Germany	present_in	SH1660490.08FU	k__Fungi;p__Basidiomycota;c__Agaricomycetes;o__Thelephorales;f__Thelephoraceae;g__unidentified;s__Thelephoraceae_sp	UCL8_000001	k__Fungi;p__Basidiomycota;c__Agaricomycetes;o__Thelephorales
8114_563	KF000499	Bistorta vivipara	Germany	new_sh_in	79	k__Fungi;p__Basidiomycota;c__Agaricomycetes;o__Sebacinales	UCL8_007582	k__Fungi;p__Basidiomycota;c__Agaricomycetes;o__Sebacinales
8114_566	KF000496	Bistorta vivipara	Germany	present_in	SH1660339.08FU	k__Fungi;p__Basidiomycota;c__Agaricomycetes;o__Thelephorales;f__Thelephoraceae;g__unidentified;s__Thelephoraceae_sp	UCL8_000001	k__Fungi;p__Basidiomycota;c__Agaricomycetes;o__Thelephorales
8114_567	KF000495	Bistorta vivipara	Germany	present_in	SH1731144.08FU	k__Fungi;p__Basidiomycota;c__Agaricomycetes;o__Sebacinales;f__Sebacinaceae;g__Sebacina;s__Sebacina_epigaea	UCL8_007582	k__Fungi;p__Basidiomycota;c__Agaricomycetes;o__Sebacinales
8114_568	KF000494	Bistorta vivipara	Germany	present_in	SH1734240.08FU	k__Fungi;p__Ascomycota;c__Leotiomycetes;o__Helotiales;f__Helotiales_fam_Incertae_sedis;g__Leohumicola;s__Leohumicola_sp	UCL8_007871	k__Fungi;p__Ascomycota;c__Leotiomycetes;o__Helotiales
8114_569	KF000493	Bistorta vivipara	Germany	present_in	SH1840358.08FU	k__Fungi;p__Basidiomycota;c__Agaricomycetes;o__Agaricales;f__Tricholomataceae;g__Tricholoma;s__Tricholoma_terreum	UCL8_013235	k__Fungi;p__Basidiomycota;c__Agaricomycetes;o__Agaricales
8114_570	KF000492	Bistorta vivipara	Germany	present_in	SH1731051.08FU	k__Fungi;p__Basidiomycota;c__Agaricomycetes;o__Sebacinales;f__Sebacinaceae;g__Sebacina;s__Sebacina_sp	UCL8_007582	k__Fungi;p__Basidiomycota;c__Agaricomycetes;o__Sebacinales
8114_571	KF000491	Bistorta vivipara	Germany	present_in	SH1731051.08FU	k__Fungi;p__Basidiomycota;c__Agaricomycetes;o__Sebacinales;f__Sebacinaceae;g__Sebacina;s__Sebacina_sp	UCL8_007582	k__Fungi;p__Basidiomycota;c__Agaricomycetes;o__Sebacinales
8114_572	KF000490	Bistorta vivipara	Germany	duplicate_of_KF000491	SH1731051.08FU	k__Fungi;p__Basidiomycota;c__Agaricomycetes;o__Sebacinales;f__Sebacinaceae;g__Sebacina;s__Sebacina_sp	UCL8_007582
8114_573	KF000489	Bistorta vivipara	Germany	present_in	SH1731051.08FU	k__Fungi;p__Basidiomycota;c__Agaricomycetes;o__Sebacinales;f__Sebacinaceae;g__Sebacina;s__Sebacina_sp	UCL8_007582	k__Fungi;p__Basidiomycota;c__Agaricomycetes;o__Sebacinales
8114_574	KF000488	Bistorta vivipara	Germany	present_in	SH1731051.08FU	k__Fungi;p__Basidiomycota;c__Agaricomycetes;o__Sebacinales;f__Sebacinaceae;g__Sebacina;s__Sebacina_sp	UCL8_007582	k__Fungi;p__Basidiomycota;c__Agaricomycetes;o__Sebacinales
8114_575	KF000487	Bistorta vivipara	Germany	present_in	SH1731051.08FU	k__Fungi;p__Basidiomycota;c__Agaricomycetes;o__Sebacinales;f__Sebacinaceae;g__Sebacina;s__Sebacina_sp	UCL8_007582	k__Fungi;p__Basidiomycota;c__Agaricomycetes;o__Sebacinales
8114_576	KF000486	Bistorta vivipara	Germany	new_sh_in	89	k__Fungi;p__Basidiomycota;c__Agaricomycetes;o__Thelephorales	UCL8_000001	k__Fungi;p__Basidiomycota;c__Agaricomycetes;o__Thelephorales
8114_577	KF000485	Bistorta vivipara	Germany	new_sh_in	89	k__Fungi;p__Basidiomycota;c__Agaricomycetes;o__Thelephorales	UCL8_000001	k__Fungi;p__Basidiomycota;c__Agaricomycetes;o__Thelephorales
8114_578	KF000484	Bistorta vivipara	Germany	present_in	SH1661197.08FU	k__Fungi;p__Basidiomycota;c__Agaricomycetes;o__Thelephorales;f__Thelephoraceae;g__Tomentella;s__Tomentella_sp	UCL8_000001	k__Fungi;p__Basidiomycota;c__Agaricomycetes;o__Thelephorales
8114_579	KF000483	Bistorta vivipara	Germany	new_sh_in	89	k__Fungi;p__Basidiomycota;c__Agaricomycetes;o__Thelephorales	UCL8_000001	k__Fungi;p__Basidiomycota;c__Agaricomycetes;o__Thelephorales
8114_580	KF000482	Bistorta vivipara	Germany	present_in	SH1731018.08FU	k__Fungi;p__Basidiomycota;c__Agaricomycetes;o__Sebacinales;f__Sebacinaceae;g__Sebacina;s__Sebacina_sp	UCL8_007582	k__Fungi;p__Basidiomycota;c__Agaricomycetes;o__Sebacinales
8114_581	KF000481	Bistorta vivipara	Germany	new_sh_in	79	k__Fungi;p__Basidiomycota;c__Agaricomycetes;o__Sebacinales	UCL8_007582	k__Fungi;p__Basidiomycota;c__Agaricomycetes;o__Sebacinales
8114_582	KF000480	Bistorta vivipara	Germany	new_sh_in	79	k__Fungi;p__Basidiomycota;c__Agaricomycetes;o__Sebacinales	UCL8_007582	k__Fungi;p__Basidiomycota;c__Agaricomycetes;o__Sebacinales
8114_583	KF000479	Bistorta vivipara	Germany	present_in	SH1740544.08FU	k__Fungi;p__Ascomycota;c__Pezizomycetes;o__Pezizales;f__Tarzettaceae;g__Tarzetta;s__Tarzetta_sp	UCL8_008309	k__Fungi;p__Ascomycota;c__Pezizomycetes;o__Pezizales
8114_584	KF000478	Bistorta vivipara	Germany	present_in	SH1682204.08FU	k__Fungi;p__Basidiomycota;c__Agaricomycetes;o__Sebacinales;f__Sebacinaceae;g__Sebacina;s__Sebacina_sp	UCL8_003407	k__Fungi;p__Basidiomycota;c__Agaricomycetes;o__Sebacinales
8114_590	KF000472	Bistorta vivipara	Germany	duplicate_of_KF000478	SH1682204.08FU	k__Fungi;p__Basidiomycota;c__Agaricomycetes;o__Sebacinales;f__Sebacinaceae;g__Sebacina;s__Sebacina_sp	UCL8_003407
8114_592	KF000470	Bistorta vivipara	Germany	duplicate_of_KF000478	SH1682204.08FU	k__Fungi;p__Basidiomycota;c__Agaricomycetes;o__Sebacinales;f__Sebacinaceae;g__Sebacina;s__Sebacina_sp	UCL8_003407
8114_585	KF000477	Bistorta vivipara	Germany	present_in	SH1682204.08FU	k__Fungi;p__Basidiomycota;c__Agaricomycetes;o__Sebacinales;f__Sebacinaceae;g__Sebacina;s__Sebacina_sp	UCL8_003407	k__Fungi;p__Basidiomycota;c__Agaricomycetes;o__Sebacinales
8114_586	KF000476	Bistorta vivipara	Germany	present_in	SH1690969.08FU	k__Fungi;p__Basidiomycota;c__Agaricomycetes;o__Thelephorales;f__Thelephoraceae;g__Tomentella;s__Tomentella_sp	UCL8_004608	k__Fungi;p__Basidiomycota;c__Agaricomycetes;o__Thelephorales
8114_587	KF000475	Bistorta vivipara	Germany	present_in	SH1690969.08FU	k__Fungi;p__Basidiomycota;c__Agaricomycetes;o__Thelephorales;f__Thelephoraceae;g__Tomentella;s__Tomentella_sp	UCL8_004608	k__Fungi;p__Basidiomycota;c__Agaricomycetes;o__Thelephorales
8114_589	KF000473	Bistorta vivipara	Germany	present_in	SH1682204.08FU	k__Fungi;p__Basidiomycota;c__Agaricomycetes;o__Sebacinales;f__Sebacinaceae;g__Sebacina;s__Sebacina_sp	UCL8_003407	k__Fungi;p__Basidiomycota;c__Agaricomycetes;o__Sebacinales
8114_588	KF000474	Bistorta vivipara	Germany	present_in	SH1690969.08FU	k__Fungi;p__Basidiomycota;c__Agaricomycetes;o__Thelephorales;f__Thelephoraceae;g__Tomentella;s__Tomentella_sp	UCL8_004608	k__Fungi;p__Basidiomycota;c__Agaricomycetes;o__Thelephorales
8114_593	KF000469	Bistorta vivipara	Germany	present_in	SH1682204.08FU	k__Fungi;p__Basidiomycota;c__Agaricomycetes;o__Sebacinales;f__Sebacinaceae;g__Sebacina;s__Sebacina_sp	UCL8_003407	k__Fungi;p__Basidiomycota;c__Agaricomycetes;o__Sebacinales
8114_591	KF000471	Bistorta vivipara	Germany	present_in	SH1682204.08FU	k__Fungi;p__Basidiomycota;c__Agaricomycetes;o__Sebacinales;f__Sebacinaceae;g__Sebacina;s__Sebacina_sp	UCL8_003407	k__Fungi;p__Basidiomycota;c__Agaricomycetes;o__Sebacinales
8114_596	KF000466	Bistorta vivipara	Germany	present_in	SH1734229.08FU	k__Fungi;p__Ascomycota;c__Leotiomycetes;o__Helotiales;f__Helotiales_fam_Incertae_sedis;g__Leohumicola;s__Leohumicola_sp	UCL8_007871	k__Fungi;p__Ascomycota;c__Leotiomycetes;o__Helotiales
8114_594	KF000468	Bistorta vivipara	Germany	new_sh_in	90	k__Fungi;p__Basidiomycota;c__Agaricomycetes;o__Thelephorales	UCL8_004608	k__Fungi;p__Basidiomycota;c__Agaricomycetes;o__Thelephorales
8114_598	KC986285	Bistorta vivipara	Germany	present_in	SH1731018.08FU	k__Fungi;p__Basidiomycota;c__Agaricomycetes;o__Sebacinales;f__Sebacinaceae;g__Sebacina;s__Sebacina_sp	UCL8_007582	k__Fungi;p__Basidiomycota;c__Agaricomycetes;o__Sebacinales
8114_597	KC986286	Bistorta vivipara	Germany	present_in	SH1731018.08FU	k__Fungi;p__Basidiomycota;c__Agaricomycetes;o__Sebacinales;f__Sebacinaceae;g__Sebacina;s__Sebacina_sp	UCL8_007582	k__Fungi;p__Basidiomycota;c__Agaricomycetes;o__Sebacinales
8114_600	KC986283	Bistorta vivipara	Germany	present_in	SH1690921.08FU	k__Fungi;p__Basidiomycota;c__Agaricomycetes;o__Thelephorales;f__Thelephoraceae;g__Tomentella;s__Tomentella_bryophila	UCL8_004608	k__Fungi;p__Basidiomycota;c__Agaricomycetes;o__Thelephorales
8114_599	KC986284	Bistorta vivipara	Germany	new_sh_in	91	k__Fungi;p__Basidiomycota;c__Agaricomycetes;o__Thelephorales	UCL8_004608	k__Fungi;p__Basidiomycota;c__Agaricomycetes;o__Thelephorales
8114_602	KC986281	Bistorta vivipara	Germany	new_sh_in	91	k__Fungi;p__Basidiomycota;c__Agaricomycetes;o__Thelephorales	UCL8_004608	k__Fungi;p__Basidiomycota;c__Agaricomycetes;o__Thelephorales
8114_601	KC986282	Bistorta vivipara	Germany	new_sh_in	91	k__Fungi;p__Basidiomycota;c__Agaricomycetes;o__Thelephorales	UCL8_004608	k__Fungi;p__Basidiomycota;c__Agaricomycetes;o__Thelephorales
8114_604	KC986279	Bistorta vivipara	Germany	present_in	SH1690969.08FU	k__Fungi;p__Basidiomycota;c__Agaricomycetes;o__Thelephorales;f__Thelephoraceae;g__Tomentella;s__Tomentella_sp	UCL8_004608	k__Fungi;p__Basidiomycota;c__Agaricomycetes;o__Thelephorales
8114_603	KC986280	Bistorta vivipara	Germany	present_in	SH1733371.08FU	k__Fungi;p__Basidiomycota;c__Agaricomycetes;o__Agaricales;f__unidentified;g__unidentified;s__Agaricales_sp	UCL8_007783	k__Fungi;p__Basidiomycota;c__Agaricomycetes;o__Agaricales
8114_605	KC986278	Bistorta vivipara	Germany	present_in	SH1690969.08FU	k__Fungi;p__Basidiomycota;c__Agaricomycetes;o__Thelephorales;f__Thelephoraceae;g__Tomentella;s__Tomentella_sp	UCL8_004608	k__Fungi;p__Basidiomycota;c__Agaricomycetes;o__Thelephorales
8114_606	KC986277	Bistorta vivipara	Germany	present_in	SH1733371.08FU	k__Fungi;p__Basidiomycota;c__Agaricomycetes;o__Agaricales;f__unidentified;g__unidentified;s__Agaricales_sp	UCL8_007783	k__Fungi;p__Basidiomycota;c__Agaricomycetes;o__Agaricales
8114_608	KC986275	Bistorta vivipara	Germany	new_sh_in	83	k__Fungi;p__Ascomycota;c__Pezizomycetes;o__Pezizales	UCL8_006043	k__Fungi;p__Ascomycota;c__Pezizomycetes;o__Pezizales
8114_610	KC986273	Bistorta vivipara	Germany	duplicate_of_KC986275	83	k__Fungi;p__Ascomycota;c__Pezizomycetes;o__Pezizales	UCL8_006043
8114_607	KC986276	Bistorta vivipara	Germany	present_in	SH1690969.08FU	k__Fungi;p__Basidiomycota;c__Agaricomycetes;o__Thelephorales;f__Thelephoraceae;g__Tomentella;s__Tomentella_sp	UCL8_004608	k__Fungi;p__Basidiomycota;c__Agaricomycetes;o__Thelephorales
8114_609	KC986274	Bistorta vivipara	Germany	present_in	SH1750383.08FU	k__Fungi;p__Basidiomycota;c__Agaricomycetes;o__Sebacinales;f__Serendipitaceae;g__Serendipita;s__Serendipita_sp	UCL8_009172	k__Fungi;p__Basidiomycota;c__Agaricomycetes;o__Sebacinales
8114_611	KC986272	Bistorta vivipara	Germany	present_in	SH1660165.08FU	k__Fungi;p__Basidiomycota;c__Agaricomycetes;o__Thelephorales;f__Thelephoraceae;g__unidentified;s__Thelephoraceae_sp	UCL8_000001	k__Fungi;p__Basidiomycota;c__Agaricomycetes;o__Thelephorales
8114_612	KC986271	Bistorta vivipara	Germany	present_in	SH1660165.08FU	k__Fungi;p__Basidiomycota;c__Agaricomycetes;o__Thelephorales;f__Thelephoraceae;g__unidentified;s__Thelephoraceae_sp	UCL8_000001	k__Fungi;p__Basidiomycota;c__Agaricomycetes;o__Thelephorales
8114_613	KC986270	Bistorta vivipara	Germany	present_in	SH1660165.08FU	k__Fungi;p__Basidiomycota;c__Agaricomycetes;o__Thelephorales;f__Thelephoraceae;g__unidentified;s__Thelephoraceae_sp	UCL8_000001	k__Fungi;p__Basidiomycota;c__Agaricomycetes;o__Thelephorales
8114_614	KC986269	Bistorta vivipara	Germany	duplicate_of_KC986270	SH1660165.08FU	k__Fungi;p__Basidiomycota;c__Agaricomycetes;o__Thelephorales;f__Thelephoraceae;g__unidentified;s__Thelephoraceae_sp	UCL8_000001
8114_615	KC986268	Bistorta vivipara	Germany	duplicate_of_KC986270	SH1660165.08FU	k__Fungi;p__Basidiomycota;c__Agaricomycetes;o__Thelephorales;f__Thelephoraceae;g__unidentified;s__Thelephoraceae_sp	UCL8_000001
8114_616	KC986267	Bistorta vivipara	Germany	duplicate_of_KC986270	SH1660165.08FU	k__Fungi;p__Basidiomycota;c__Agaricomycetes;o__Thelephorales;f__Thelephoraceae;g__unidentified;s__Thelephoraceae_sp	UCL8_000001
8114_617	KC986266	Bistorta vivipara	Germany	present_in	SH1660165.08FU	k__Fungi;p__Basidiomycota;c__Agaricomycetes;o__Thelephorales;f__Thelephoraceae;g__unidentified;s__Thelephoraceae_sp	UCL8_000001	k__Fungi;p__Basidiomycota;c__Agaricomycetes;o__Thelephorales
8114_618	KC986265	Bistorta vivipara	Germany	present_in	SH1731041.08FU	k__Fungi;p__Basidiomycota;c__Agaricomycetes;o__Sebacinales;f__Sebacinaceae;g__Sebacina;s__Sebacina_dimitica	UCL8_007582	k__Fungi;p__Basidiomycota;c__Agaricomycetes;o__Sebacinales
8114_619	KC986264	Bistorta vivipara	Germany	new_sh_in	92	k__Fungi;p__Ascomycota;c__Dothideomycetes;o__Mytilinidales	UCL8_012211	k__Fungi;p__Ascomycota;c__Dothideomycetes;o__Mytilinidales
8114_620	KC986263	Bistorta vivipara	Germany	new_sh_in	92	k__Fungi;p__Ascomycota;c__Dothideomycetes;o__Mytilinidales	UCL8_012211	k__Fungi;p__Ascomycota;c__Dothideomycetes;o__Mytilinidales
8114_621	KC986262	Bistorta vivipara	Germany	present_in	SH1731007.08FU	k__Fungi;p__Basidiomycota;c__Agaricomycetes;o__Sebacinales;f__Sebacinaceae;g__Sebacina;s__Sebacina_flagelliformis	UCL8_007582	k__Fungi;p__Basidiomycota;c__Agaricomycetes;o__Sebacinales
8114_622	KC986261	Bistorta vivipara	Germany	duplicate_of_KC986262	SH1731007.08FU	k__Fungi;p__Basidiomycota;c__Agaricomycetes;o__Sebacinales;f__Sebacinaceae;g__Sebacina;s__Sebacina_flagelliformis	UCL8_007582
8114_624	KC986259	Bistorta vivipara	Germany	duplicate_of_KC986262	SH1731007.08FU	k__Fungi;p__Basidiomycota;c__Agaricomycetes;o__Sebacinales;f__Sebacinaceae;g__Sebacina;s__Sebacina_flagelliformis	UCL8_007582
8114_623	KC986260	Bistorta vivipara	Germany	present_in	SH1731007.08FU	k__Fungi;p__Basidiomycota;c__Agaricomycetes;o__Sebacinales;f__Sebacinaceae;g__Sebacina;s__Sebacina_flagelliformis	UCL8_007582	k__Fungi;p__Basidiomycota;c__Agaricomycetes;o__Sebacinales
8114_625	KC986258	Bistorta vivipara	Germany	present_in	SH1731030.08FU	k__Fungi;p__Basidiomycota;c__Agaricomycetes;o__Sebacinales;f__Sebacinaceae;g__Sebacina;s__Sebacina_incrustans	UCL8_007582	k__Fungi;p__Basidiomycota;c__Agaricomycetes;o__Sebacinales
8114_629	KC986254	Bistorta vivipara	Germany	duplicate_of_KC986258	SH1731030.08FU	k__Fungi;p__Basidiomycota;c__Agaricomycetes;o__Sebacinales;f__Sebacinaceae;g__Sebacina;s__Sebacina_incrustans	UCL8_007582
8114_630	KC986253	Bistorta vivipara	Germany	duplicate_of_KC986258	SH1731030.08FU	k__Fungi;p__Basidiomycota;c__Agaricomycetes;o__Sebacinales;f__Sebacinaceae;g__Sebacina;s__Sebacina_incrustans	UCL8_007582
8114_626	KC986257	Bistorta vivipara	Germany	present_in	SH1680297.08FU	k__Fungi;p__Ascomycota;c__Pezizomycetes;o__Pezizales;f__Pyronemataceae;g__Trichophaea;s__Trichophaea_sp	UCL8_003007	k__Fungi;p__Ascomycota;c__Pezizomycetes;o__Pezizales
8114_628	KC986255	Bistorta vivipara	Germany	present_in	SH1667618.08FU	k__Fungi;p__Ascomycota;c__Pezizomycetes;o__Pezizales;f__Pezizaceae;g__Sarcosphaera;s__Sarcosphaera_coronaria	UCL8_000734	k__Fungi;p__Ascomycota;c__Pezizomycetes;o__Pezizales
8114_627	KC986256	Bistorta vivipara	Germany	present_in	SH1672832.08FU	k__Fungi;p__Basidiomycota;c__Agaricomycetes;o__Sebacinales;f__Sebacinaceae;g__Sebacina;s__Sebacina_sp	UCL8_001587	k__Fungi;p__Basidiomycota;c__Agaricomycetes;o__Sebacinales
8114_632	KC986251	Bistorta vivipara	Germany	present_in	SH1691148.08FU	k__Fungi;p__Basidiomycota;c__Agaricomycetes;o__Thelephorales;f__Thelephoraceae;g__unidentified;s__Thelephoraceae_sp	UCL8_004608	k__Fungi;p__Basidiomycota;c__Agaricomycetes;o__Thelephorales
8114_633	KC986250	Bistorta vivipara	Germany	duplicate_of_KC986251	SH1691148.08FU	k__Fungi;p__Basidiomycota;c__Agaricomycetes;o__Thelephorales;f__Thelephoraceae;g__unidentified;s__Thelephoraceae_sp	UCL8_004608
8114_631	KC986252	Bistorta vivipara	Germany	present_in	SH1691148.08FU	k__Fungi;p__Basidiomycota;c__Agaricomycetes;o__Thelephorales;f__Thelephoraceae;g__unidentified;s__Thelephoraceae_sp	UCL8_004608	k__Fungi;p__Basidiomycota;c__Agaricomycetes;o__Thelephorales
8114_635	KC986248	Bistorta vivipara	Germany	present_in	SH1682214.08FU	k__Fungi;p__Basidiomycota;c__Agaricomycetes;o__Sebacinales;f__Sebacinaceae;g__Sebacina;s__Sebacina_sp	UCL8_003407	k__Fungi;p__Basidiomycota;c__Agaricomycetes;o__Sebacinales
8114_634	KC986249	Bistorta vivipara	Germany	present_in	SH1682214.08FU	k__Fungi;p__Basidiomycota;c__Agaricomycetes;o__Sebacinales;f__Sebacinaceae;g__Sebacina;s__Sebacina_sp	UCL8_003407	k__Fungi;p__Basidiomycota;c__Agaricomycetes;o__Sebacinales
8114_636	KC986247	Bistorta vivipara	Germany	duplicate_of_KC986249	SH1682214.08FU	k__Fungi;p__Basidiomycota;c__Agaricomycetes;o__Sebacinales;f__Sebacinaceae;g__Sebacina;s__Sebacina_sp	UCL8_003407
8114_637	KC986246	Bistorta vivipara	Germany	duplicate_of_KC986249	SH1682214.08FU	k__Fungi;p__Basidiomycota;c__Agaricomycetes;o__Sebacinales;f__Sebacinaceae;g__Sebacina;s__Sebacina_sp	UCL8_003407
8114_638	KC986245	Bistorta vivipara	Germany	present_in	SH1672829.08FU	k__Fungi;p__Basidiomycota;c__Agaricomycetes;o__Sebacinales;f__Sebacinaceae;g__Sebacina;s__Sebacina_sp	UCL8_001587	k__Fungi;p__Basidiomycota;c__Agaricomycetes;o__Sebacinales
8114_639	KC986244	Bistorta vivipara	Germany	present_in	SH1672829.08FU	k__Fungi;p__Basidiomycota;c__Agaricomycetes;o__Sebacinales;f__Sebacinaceae;g__Sebacina;s__Sebacina_sp	UCL8_001587	k__Fungi;p__Basidiomycota;c__Agaricomycetes;o__Sebacinales
8114_640	KC986243	Bistorta vivipara	Germany	present_in	SH1672829.08FU	k__Fungi;p__Basidiomycota;c__Agaricomycetes;o__Sebacinales;f__Sebacinaceae;g__Sebacina;s__Sebacina_sp	UCL8_001587	k__Fungi;p__Basidiomycota;c__Agaricomycetes;o__Sebacinales
8114_641	KC986242	Bistorta vivipara	Germany	present_in	SH1672829.08FU	k__Fungi;p__Basidiomycota;c__Agaricomycetes;o__Sebacinales;f__Sebacinaceae;g__Sebacina;s__Sebacina_sp	UCL8_001587	k__Fungi;p__Basidiomycota;c__Agaricomycetes;o__Sebacinales
8114_643	KC986240	Bistorta vivipara	Germany	present_in	SH1731015.08FU	k__Fungi;p__Basidiomycota;c__Agaricomycetes;o__Sebacinales;f__Sebacinaceae;g__Sebacina;s__Sebacina_sp	UCL8_007582	k__Fungi;p__Basidiomycota;c__Agaricomycetes;o__Sebacinales
8114_642	KC986241	Bistorta vivipara	Germany	present_in	SH1672829.08FU	k__Fungi;p__Basidiomycota;c__Agaricomycetes;o__Sebacinales;f__Sebacinaceae;g__Sebacina;s__Sebacina_sp	UCL8_001587	k__Fungi;p__Basidiomycota;c__Agaricomycetes;o__Sebacinales
8114_645	KC986238	Bistorta vivipara	Germany	present_in	SH1731015.08FU	k__Fungi;p__Basidiomycota;c__Agaricomycetes;o__Sebacinales;f__Sebacinaceae;g__Sebacina;s__Sebacina_sp	UCL8_007582	k__Fungi;p__Basidiomycota;c__Agaricomycetes;o__Sebacinales
8114_644	KC986239	Bistorta vivipara	Germany	present_in	SH1731015.08FU	k__Fungi;p__Basidiomycota;c__Agaricomycetes;o__Sebacinales;f__Sebacinaceae;g__Sebacina;s__Sebacina_sp	UCL8_007582	k__Fungi;p__Basidiomycota;c__Agaricomycetes;o__Sebacinales
8114_646	KC986237	Bistorta vivipara	Germany	present_in	SH1731015.08FU	k__Fungi;p__Basidiomycota;c__Agaricomycetes;o__Sebacinales;f__Sebacinaceae;g__Sebacina;s__Sebacina_sp	UCL8_007582	k__Fungi;p__Basidiomycota;c__Agaricomycetes;o__Sebacinales
8114_647	KC986236	Bistorta vivipara	Germany	present_in	SH1794914.08FU	k__Fungi;p__Basidiomycota;c__Agaricomycetes;o__Thelephorales;f__Thelephoraceae;g__Tomentella;s__Tomentella_sp	UCL8_010267	k__Fungi;p__Basidiomycota;c__Agaricomycetes;o__Thelephorales
8114_649	UDB026634|MM502_pach01	Bistorta vivipara	Estonia	new_sh_in	93	k__Fungi;p__Ascomycota;c__Pezizomycetes;o__Pezizales	UCL8_011144	k__Fungi;p__Ascomycota;c__Pezizomycetes;o__Pezizales
8114_648	UDB026633|MM500_Tom01	Bistorta vivipara	Estonia	present_in	SH1660960.08FU	k__Fungi;p__Basidiomycota;c__Agaricomycetes;o__Thelephorales;f__Thelephoraceae;g__Tomentella;s__Tomentella_sp	UCL8_000001	k__Fungi;p__Basidiomycota;c__Agaricomycetes;o__Thelephorales
8114_650	UDB026635|MM504	Bistorta vivipara	Estonia	present_in	SH1666041.08FU	k__Fungi;p__Ascomycota;c__Dothideomycetes;o__Botryosphaeriales;f__Botryosphaeriaceae;g__Lasiodiplodia;s__Lasiodiplodia_theobromae	UCL8_000450	k__Fungi;p__Ascomycota;c__Dothideomycetes;o__Botryosphaeriales
8114_651	UDB026637|MM505_Tom07	Bistorta vivipara	Estonia	new_sh_in	86	k__Fungi;p__Basidiomycota;c__Agaricomycetes;o__Thelephorales	UCL8_000001	k__Fungi;p__Basidiomycota;c__Agaricomycetes;o__Thelephorales
8114_652	UDB026638|MM506_tom12	Bistorta vivipara	Estonia	new_sh_in	94	k__Fungi;p__Basidiomycota;c__Agaricomycetes;o__Thelephorales	UCL8_000001	k__Fungi;p__Basidiomycota;c__Agaricomycetes;o__Thelephorales
8114_653	UDB026639|MM508_Tom03	Bistorta vivipara	Estonia	present_in	SH1690976.08FU	k__Fungi;p__Basidiomycota;c__Agaricomycetes;o__Thelephorales;f__Thelephoraceae;g__Tomentella;s__Tomentella_sp	UCL8_004608	k__Fungi;p__Basidiomycota;c__Agaricomycetes;o__Thelephorales
8114_654	UDB026640|MM509_PezO	Bistorta vivipara	Estonia	new_sh_in	95	k__Fungi;p__Ascomycota;c__Pezizomycetes;o__Pezizales	UCL8_011538	k__Fungi;p__Ascomycota;c__Pezizomycetes;o__Pezizales
8114_655	UDB026641|MM510	Bistorta vivipara	Estonia	present_in	SH1794177.08FU	k__Fungi;p__Ascomycota;c__Sordariomycetes;o__Hypocreales;f__Nectriaceae;g__unidentified;s__Nectriaceae_sp	UCL8_010206	k__Fungi;p__Ascomycota;c__Sordariomycetes;o__Hypocreales
8114_656	UDB026642|MM512_Seb04	Bistorta vivipara	Estonia	present_in	SH1744102.08FU	k__Fungi;p__Basidiomycota;c__Agaricomycetes;o__Sebacinales;f__Sebacinaceae;g__Sebacina;s__Sebacina_sp	UCL8_008621	k__Fungi;p__Basidiomycota;c__Agaricomycetes;o__Sebacinales
8114_657	UDB026643|MM513_Tom04	Bistorta vivipara	Estonia	present_in	SH1660961.08FU	k__Fungi;p__Basidiomycota;c__Agaricomycetes;o__Thelephorales;f__Thelephoraceae;g__Tomentella;s__Tomentella_sp	UCL8_000001	k__Fungi;p__Basidiomycota;c__Agaricomycetes;o__Thelephorales
8114_670	UDB026656|MM542_Tom04	Bistorta vivipara	Estonia	duplicate_of_UDB026643|MM513_Tom04	SH1660961.08FU	k__Fungi;p__Basidiomycota;c__Agaricomycetes;o__Thelephorales;f__Thelephoraceae;g__Tomentella;s__Tomentella_sp	UCL8_000001
8114_658	UDB026644|MM515_Tom06	Bistorta vivipara	Estonia	present_in	SH1659918.08FU	k__Fungi;p__Basidiomycota;c__Agaricomycetes;o__Thelephorales;f__Thelephoraceae;g__Tomentella;s__Tomentella_punicea	UCL8_000001	k__Fungi;p__Basidiomycota;c__Agaricomycetes;o__Thelephorales
8114_659	UDB026645|MM518	Bistorta vivipara	Estonia	present_in	SH1735645.08FU	k__Fungi;p__Basidiomycota;c__Malasseziomycetes;o__Malasseziales;f__Malasseziaceae;g__Malassezia;s__Malassezia_globosa	UCL8_008021	k__Fungi;p__Basidiomycota;c__Malasseziomycetes;o__Malasseziales
8114_660	UDB026646|MM520a_PezM	Bistorta vivipara	Estonia	present_in	SH1675882.08FU	k__Fungi;p__Ascomycota;c__Pezizomycetes;o__Pezizales;f__Pezizaceae;g__unidentified;s__Pezizaceae_sp	UCL8_002183	k__Fungi;p__Ascomycota;c__Pezizomycetes;o__Pezizales
8114_696	UDB026687|MM592_PezM	Bistorta vivipara	Estonia	duplicate_of_UDB026646|MM520a_PezM	SH1675882.08FU	k__Fungi;p__Ascomycota;c__Pezizomycetes;o__Pezizales;f__Pezizaceae;g__unidentified;s__Pezizaceae_sp	UCL8_002183
8114_661	UDB026647|MM522	Bistorta vivipara	Estonia	present_in	SH1712939.08FU	k__Fungi;p__Ascomycota;c__Eurotiomycetes;o__Chaetothyriales;f__unidentified;g__unidentified;s__Chaetothyriales_sp	UCL8_006270	k__Fungi;p__Ascomycota;c__Eurotiomycetes;o__Chaetothyriales
8114_662	UDB026648|MM522a_cort02	Bistorta vivipara	Estonia	present_in	SH1661959.08FU	k__Fungi;p__Basidiomycota;c__Agaricomycetes;o__Agaricales;f__Cortinariaceae;g__Cortinarius;s__Cortinarius_sp	UCL8_000003	k__Fungi;p__Basidiomycota;c__Agaricomycetes;o__Agaricales
8114_663	UDB026649|MM524_Aln01	Bistorta vivipara	Estonia	present_in	SH1733393.08FU	k__Fungi;p__Basidiomycota;c__Agaricomycetes;o__Agaricales;f__Hymenogastraceae;g__Hymenogaster;s__Hymenogaster_megasporus	UCL8_007783	k__Fungi;p__Basidiomycota;c__Agaricomycetes;o__Agaricales
8114_664	UDB026650|MM526_Tom11	Bistorta vivipara	Estonia	present_in	SH1690944.08FU	k__Fungi;p__Basidiomycota;c__Agaricomycetes;o__Thelephorales;f__Thelephoraceae;g__Tomentella;s__Tomentella_umbrinospora	UCL8_004608	k__Fungi;p__Basidiomycota;c__Agaricomycetes;o__Thelephorales
8114_665	UDB026651|MM527_Tom08	Bistorta vivipara	Estonia	present_in	SH1690934.08FU	k__Fungi;p__Basidiomycota;c__Agaricomycetes;o__Thelephorales;f__Thelephoraceae;g__Tomentella;s__Tomentella_sp	UCL8_004608	k__Fungi;p__Basidiomycota;c__Agaricomycetes;o__Thelephorales
8114_666	UDB026652|MM530_Tom13	Bistorta vivipara	Estonia	new_sh_in	96	k__Fungi;p__Basidiomycota;c__Agaricomycetes;o__Thelephorales	UCL8_004608	k__Fungi;p__Basidiomycota;c__Agaricomycetes;o__Thelephorales
8114_668	UDB026654|MM537_Tom07	Bistorta vivipara	Estonia	new_sh_in	86	k__Fungi;p__Basidiomycota;c__Agaricomycetes;o__Thelephorales	UCL8_000001	k__Fungi;p__Basidiomycota;c__Agaricomycetes;o__Thelephorales
8114_669	UDB026655|MM538_Tom09	Bistorta vivipara	Estonia	new_sh_in	97	k__Fungi;p__Basidiomycota;c__Agaricomycetes;o__Thelephorales	UCL8_004608	k__Fungi;p__Basidiomycota;c__Agaricomycetes;o__Thelephorales
8114_671	UDB026657|MM544	Bistorta vivipara	Estonia	present_in	SH1834520.08FU	k__Fungi;p__Ascomycota;c__Pezizomycetes;o__Pezizales;f__Pezizaceae;g__unidentified;s__Pezizaceae_sp	UCL8_012532	k__Fungi;p__Ascomycota;c__Pezizomycetes;o__Pezizales
8114_672	UDB026658|MM545	Bistorta vivipara	Estonia	new_sh_in	92	k__Fungi;p__Ascomycota;c__Dothideomycetes;o__Mytilinidales	UCL8_012211	k__Fungi;p__Ascomycota;c__Dothideomycetes;o__Mytilinidales
8114_673	UDB026659|MM546_Tom13	Bistorta vivipara	Estonia	present_in	SH1690974.08FU	k__Fungi;p__Basidiomycota;c__Agaricomycetes;o__unidentified;f__unidentified;g__unidentified;s__Agaricomycetes_sp	UCL8_004608	k__Fungi;p__Basidiomycota;c__Agaricomycetes;o__Thelephorales
8114_674	UDB026660|MM547_Tom05	Bistorta vivipara	Estonia	present_in	SH1660259.08FU	k__Fungi;p__Basidiomycota;c__Agaricomycetes;o__Thelephorales;f__Thelephoraceae;g__unidentified;s__Thelephoraceae_sp	UCL8_000001	k__Fungi;p__Basidiomycota;c__Agaricomycetes;o__Thelephorales
8114_675	UDB026662|MM552_Tom10	Bistorta vivipara	Estonia	new_sh_in	78	k__Fungi;p__Basidiomycota;c__Agaricomycetes;o__Thelephorales	UCL8_000001	k__Fungi;p__Basidiomycota;c__Agaricomycetes;o__Thelephorales
8114_676	UDB026663|MM557	Bistorta vivipara	Estonia	present_in	SH1675652.08FU	k__Fungi;p__Ascomycota;c__Geoglossomycetes;o__Geoglossales;f__Geoglossaceae;g__Geoglossum;s__Geoglossum_sp	UCL8_002107	k__Fungi;p__Ascomycota;c__Geoglossomycetes;o__Geoglossales
8114_677	UDB026664|MM559	Bistorta vivipara	Estonia	present_in	SH1710877.08FU	k__Fungi;p__Ascomycota;c__Leotiomycetes;o__Helotiales;f__unidentified;g__unidentified;s__Helotiales_sp	UCL8_006055	k__Fungi;p__Ascomycota;c__Leotiomycetes;o__Helotiales
8114_678	UDB026665|MM560	Bistorta vivipara	Estonia	present_in	SH1732403.08FU	k__Fungi;p__Ascomycota;c__Geoglossomycetes;o__Geoglossales;f__Geoglossaceae;g__Geoglossum;s__Geoglossum_sp	UCL8_007675	k__Fungi;p__Ascomycota;c__Geoglossomycetes;o__Geoglossales
8114_679	UDB026666|MM561_Tom10	Bistorta vivipara	Estonia	new_sh_in	78	k__Fungi;p__Basidiomycota;c__Agaricomycetes;o__Thelephorales	UCL8_000001	k__Fungi;p__Basidiomycota;c__Agaricomycetes;o__Thelephorales
8114_680	UDB026667|MM563	Bistorta vivipara	Estonia	present_in	SH1735155.08FU	k__Fungi;p__Basidiomycota;c__Agaricomycetes;o__Agaricales;f__Schizophyllaceae;g__Schizophyllum;s__Schizophyllum_commune	UCL8_007953	k__Fungi;p__Basidiomycota;c__Agaricomycetes;o__Agaricales
8114_681	UDB026668|MM566_pach02	Bistorta vivipara	Estonia	present_in	SH1809525.08FU	k__Fungi;p__Ascomycota;c__Pezizomycetes;o__Pezizales;f__Pezizaceae;g__Pachyphlodes;s__Pachyphlodes_citrina	UCL8_011144	k__Fungi;p__Ascomycota;c__Pezizomycetes;o__Pezizales
8114_682	UDB026669|MM567_Tom14	Bistorta vivipara	Estonia	new_sh_in	84	k__Fungi;p__Basidiomycota;c__Agaricomycetes;o__Thelephorales	UCL8_000001	k__Fungi;p__Basidiomycota;c__Agaricomycetes;o__Thelephorales
8114_683	UDB026670|MM568_Tom13	Bistorta vivipara	Estonia	present_in	SH1690974.08FU	k__Fungi;p__Basidiomycota;c__Agaricomycetes;o__unidentified;f__unidentified;g__unidentified;s__Agaricomycetes_sp	UCL8_004608	k__Fungi;p__Basidiomycota;c__Agaricomycetes;o__Thelephorales
8114_684	UDB026672|MM570_Tom15	Bistorta vivipara	Estonia	present_in	SH1691386.08FU	k__Fungi;p__Basidiomycota;c__Agaricomycetes;o__Thelephorales;f__Thelephoraceae;g__Tomentella;s__Tomentella_sp	UCL8_004608	k__Fungi;p__Basidiomycota;c__Agaricomycetes;o__Thelephorales
8114_685	UDB026674|MM572	Bistorta vivipara	Estonia	present_in	SH1735919.08FU	k__Fungi;p__Basidiomycota;c__Agaricomycetes;o__Polyporales;f__Polyporaceae;g__Trametes;s__Trametes_versicolor	UCL8_008039	k__Fungi;p__Basidiomycota;c__Agaricomycetes;o__Polyporales
8114_686	UDB026675|MM573_Tom16	Bistorta vivipara	Estonia	new_sh_in	98	k__Fungi;p__Basidiomycota;c__Agaricomycetes;o__Thelephorales	UCL8_000001	k__Fungi;p__Basidiomycota;c__Agaricomycetes;o__Thelephorales
8114_687	UDB026676|MM575_Tom17	Bistorta vivipara	Estonia	new_sh_in	99	k__Fungi;p__Basidiomycota;c__Agaricomycetes;o__Thelephorales	UCL8_000164	k__Fungi;p__Basidiomycota;c__Agaricomycetes;o__Thelephorales
8114_688	UDB026677|MM576_Tom05	Bistorta vivipara	Estonia	present_in	SH1660259.08FU	k__Fungi;p__Basidiomycota;c__Agaricomycetes;o__Thelephorales;f__Thelephoraceae;g__unidentified;s__Thelephoraceae_sp	UCL8_000001	k__Fungi;p__Basidiomycota;c__Agaricomycetes;o__Thelephorales
8114_689	UDB026678|MM581_Inoc03	Bistorta vivipara	Estonia	new_sh_in	100	k__Fungi;p__Basidiomycota;c__Agaricomycetes;o__Agaricales	UCL8_013627	k__Fungi;p__Basidiomycota;c__Agaricomycetes;o__Agaricales
8114_690	UDB026679|MM582_Tom18	Bistorta vivipara	Estonia	present_in	SH1660265.08FU	k__Fungi;p__Basidiomycota;c__Agaricomycetes;o__Thelephorales;f__Thelephoraceae;g__Tomentella;s__Tomentella_sp	UCL8_000001	k__Fungi;p__Basidiomycota;c__Agaricomycetes;o__Thelephorales
8114_691	UDB026680|MM583_Tub01	Bistorta vivipara	Estonia	present_in	SH1737265.08FU	k__Fungi;p__Ascomycota;c__Pezizomycetes;o__Pezizales;f__Tuberaceae;g__Tuber;s__Tuber_maculatum	UCL8_008151	k__Fungi;p__Ascomycota;c__Pezizomycetes;o__Pezizales
8114_692	UDB026683|MM585_RuLa01	Bistorta vivipara	Estonia	new_sh_in	101	k__Fungi;p__Basidiomycota;c__Agaricomycetes;o__Russulales	UCL8_002924	k__Fungi;p__Basidiomycota;c__Agaricomycetes;o__Russulales
8114_693	UDB026684|MM586_Tom19	Bistorta vivipara	Estonia	present_in	SH1690996.08FU	k__Fungi;p__Basidiomycota;c__Agaricomycetes;o__Thelephorales;f__Thelephoraceae;g__Tomentella;s__Tomentella_sp	UCL8_004608	k__Fungi;p__Basidiomycota;c__Agaricomycetes;o__Thelephorales
8114_694	UDB026685|MM588_RuLa02	Bistorta vivipara	Estonia	present_in	SH1679684.08FU	k__Fungi;p__Basidiomycota;c__Agaricomycetes;o__Russulales;f__Russulaceae;g__Lactarius;s__Lactarius_evosmus	UCL8_002924	k__Fungi;p__Basidiomycota;c__Agaricomycetes;o__Russulales
8114_695	UDB026686|MM590_Tom20	Bistorta vivipara	Estonia	present_in	SH1690918.08FU	k__Fungi;p__Basidiomycota;c__Agaricomycetes;o__Thelephorales;f__Thelephoraceae;g__Tomentella;s__Tomentella_sp	UCL8_004608	k__Fungi;p__Basidiomycota;c__Agaricomycetes;o__Thelephorales
8114_697	UDB026688|MM594_Inoc04	Bistorta vivipara	Estonia	new_sh_in	102	k__Fungi;p__Basidiomycota;c__Agaricomycetes;o__Agaricales	UCL8_007779	k__Fungi;p__Basidiomycota;c__Agaricomycetes;o__Agaricales
8114_698	UDB026689|MM595_Tom21	Bistorta vivipara	Estonia	new_sh_in	103	k__Fungi;p__Basidiomycota;c__Agaricomycetes;o__Thelephorales	UCL8_000001	k__Fungi;p__Basidiomycota;c__Agaricomycetes;o__Thelephorales
8114_699	KY446896	Bistorta vivipara	Unspecified	present_in	SH1659854.08FU	k__Fungi;p__Basidiomycota;c__Agaricomycetes;o__Thelephorales;f__Thelephoraceae;g__Tomentella;s__Tomentella_ellisii	UCL8_000001	k__Fungi;p__Basidiomycota;c__Agaricomycetes;o__Thelephorales
8114_703	KY446892	Bistorta vivipara	Unspecified	duplicate_of_KY446896	SH1659854.08FU	k__Fungi;p__Basidiomycota;c__Agaricomycetes;o__Thelephorales;f__Thelephoraceae;g__Tomentella;s__Tomentella_ellisii	UCL8_000001
8114_700	KY446895	Bistorta vivipara	Unspecified	present_in	SH1659854.08FU	k__Fungi;p__Basidiomycota;c__Agaricomycetes;o__Thelephorales;f__Thelephoraceae;g__Tomentella;s__Tomentella_ellisii	UCL8_000001	k__Fungi;p__Basidiomycota;c__Agaricomycetes;o__Thelephorales
8114_701	KY446894	Bistorta vivipara	Unspecified	present_in	SH1659854.08FU	k__Fungi;p__Basidiomycota;c__Agaricomycetes;o__Thelephorales;f__Thelephoraceae;g__Tomentella;s__Tomentella_ellisii	UCL8_000001	k__Fungi;p__Basidiomycota;c__Agaricomycetes;o__Thelephorales
8114_702	KY446893	Bistorta vivipara	Unspecified	present_in	SH1659854.08FU	k__Fungi;p__Basidiomycota;c__Agaricomycetes;o__Thelephorales;f__Thelephoraceae;g__Tomentella;s__Tomentella_ellisii	UCL8_000001	k__Fungi;p__Basidiomycota;c__Agaricomycetes;o__Thelephorales
8114_704	KY446891	Bistorta vivipara	Unspecified	present_in	SH1659854.08FU	k__Fungi;p__Basidiomycota;c__Agaricomycetes;o__Thelephorales;f__Thelephoraceae;g__Tomentella;s__Tomentella_ellisii	UCL8_000001	k__Fungi;p__Basidiomycota;c__Agaricomycetes;o__Thelephorales
8114_705	KY446890	Bistorta vivipara	Unspecified	present_in	SH1659854.08FU	k__Fungi;p__Basidiomycota;c__Agaricomycetes;o__Thelephorales;f__Thelephoraceae;g__Tomentella;s__Tomentella_ellisii	UCL8_000001	k__Fungi;p__Basidiomycota;c__Agaricomycetes;o__Thelephorales
8114_706	KY446889	Bistorta vivipara	Unspecified	present_in	SH1659854.08FU	k__Fungi;p__Basidiomycota;c__Agaricomycetes;o__Thelephorales;f__Thelephoraceae;g__Tomentella;s__Tomentella_ellisii	UCL8_000001	k__Fungi;p__Basidiomycota;c__Agaricomycetes;o__Thelephorales
8114_707	KY446888	Bistorta vivipara	Unspecified	present_in	SH1659854.08FU	k__Fungi;p__Basidiomycota;c__Agaricomycetes;o__Thelephorales;f__Thelephoraceae;g__Tomentella;s__Tomentella_ellisii	UCL8_000001	k__Fungi;p__Basidiomycota;c__Agaricomycetes;o__Thelephorales
8114_708	KY446887	Bistorta vivipara	Unspecified	present_in	SH1659854.08FU	k__Fungi;p__Basidiomycota;c__Agaricomycetes;o__Thelephorales;f__Thelephoraceae;g__Tomentella;s__Tomentella_ellisii	UCL8_000001	k__Fungi;p__Basidiomycota;c__Agaricomycetes;o__Thelephorales
8114_709	KY446886	Bistorta vivipara	Unspecified	present_in	SH1659867.08FU	k__Fungi;p__Basidiomycota;c__Agaricomycetes;o__Thelephorales;f__Thelephoraceae;g__Tomentella;s__Tomentella_sp	UCL8_000001	k__Fungi;p__Basidiomycota;c__Agaricomycetes;o__Thelephorales
8114_710	KY446885	Bistorta vivipara	Unspecified	present_in	SH1659867.08FU	k__Fungi;p__Basidiomycota;c__Agaricomycetes;o__Thelephorales;f__Thelephoraceae;g__Tomentella;s__Tomentella_sp	UCL8_000001	k__Fungi;p__Basidiomycota;c__Agaricomycetes;o__Thelephorales
8114_711	KY446884	Bistorta vivipara	Unspecified	present_in	SH1659867.08FU	k__Fungi;p__Basidiomycota;c__Agaricomycetes;o__Thelephorales;f__Thelephoraceae;g__Tomentella;s__Tomentella_sp	UCL8_000001	k__Fungi;p__Basidiomycota;c__Agaricomycetes;o__Thelephorales
8114_712	KY446883	Bistorta vivipara	Unspecified	present_in	SH1659867.08FU	k__Fungi;p__Basidiomycota;c__Agaricomycetes;o__Thelephorales;f__Thelephoraceae;g__Tomentella;s__Tomentella_sp	UCL8_000001	k__Fungi;p__Basidiomycota;c__Agaricomycetes;o__Thelephorales
8114_715	KY446880	Bistorta vivipara	Unspecified	duplicate_of_KY446883	SH1659867.08FU	k__Fungi;p__Basidiomycota;c__Agaricomycetes;o__Thelephorales;f__Thelephoraceae;g__Tomentella;s__Tomentella_sp	UCL8_000001
8114_728	KY446867	Bistorta vivipara	Unspecified	duplicate_of_KY446883	SH1659867.08FU	k__Fungi;p__Basidiomycota;c__Agaricomycetes;o__Thelephorales;f__Thelephoraceae;g__Tomentella;s__Tomentella_sp	UCL8_000001
8114_713	KY446882	Bistorta vivipara	Unspecified	present_in	SH1659867.08FU	k__Fungi;p__Basidiomycota;c__Agaricomycetes;o__Thelephorales;f__Thelephoraceae;g__Tomentella;s__Tomentella_sp	UCL8_000001	k__Fungi;p__Basidiomycota;c__Agaricomycetes;o__Thelephorales
8114_727	KY446868	Bistorta vivipara	Unspecified	duplicate_of_KY446882	SH1659867.08FU	k__Fungi;p__Basidiomycota;c__Agaricomycetes;o__Thelephorales;f__Thelephoraceae;g__Tomentella;s__Tomentella_sp	UCL8_000001
8114_714	KY446881	Bistorta vivipara	Unspecified	present_in	SH1659867.08FU	k__Fungi;p__Basidiomycota;c__Agaricomycetes;o__Thelephorales;f__Thelephoraceae;g__Tomentella;s__Tomentella_sp	UCL8_000001	k__Fungi;p__Basidiomycota;c__Agaricomycetes;o__Thelephorales
8114_716	KY446879	Bistorta vivipara	Unspecified	present_in	SH1659867.08FU	k__Fungi;p__Basidiomycota;c__Agaricomycetes;o__Thelephorales;f__Thelephoraceae;g__Tomentella;s__Tomentella_sp	UCL8_000001	k__Fungi;p__Basidiomycota;c__Agaricomycetes;o__Thelephorales
8114_717	KY446878	Bistorta vivipara	Unspecified	present_in	SH1659867.08FU	k__Fungi;p__Basidiomycota;c__Agaricomycetes;o__Thelephorales;f__Thelephoraceae;g__Tomentella;s__Tomentella_sp	UCL8_000001	k__Fungi;p__Basidiomycota;c__Agaricomycetes;o__Thelephorales
8114_718	KY446877	Bistorta vivipara	Unspecified	duplicate_of_KY446878	SH1659867.08FU	k__Fungi;p__Basidiomycota;c__Agaricomycetes;o__Thelephorales;f__Thelephoraceae;g__Tomentella;s__Tomentella_sp	UCL8_000001
8114_719	KY446876	Bistorta vivipara	Unspecified	present_in	SH1659867.08FU	k__Fungi;p__Basidiomycota;c__Agaricomycetes;o__Thelephorales;f__Thelephoraceae;g__Tomentella;s__Tomentella_sp	UCL8_000001	k__Fungi;p__Basidiomycota;c__Agaricomycetes;o__Thelephorales
8114_720	KY446875	Bistorta vivipara	Unspecified	present_in	SH1659867.08FU	k__Fungi;p__Basidiomycota;c__Agaricomycetes;o__Thelephorales;f__Thelephoraceae;g__Tomentella;s__Tomentella_sp	UCL8_000001	k__Fungi;p__Basidiomycota;c__Agaricomycetes;o__Thelephorales
8114_721	KY446874	Bistorta vivipara	Unspecified	present_in	SH1659867.08FU	k__Fungi;p__Basidiomycota;c__Agaricomycetes;o__Thelephorales;f__Thelephoraceae;g__Tomentella;s__Tomentella_sp	UCL8_000001	k__Fungi;p__Basidiomycota;c__Agaricomycetes;o__Thelephorales
8114_724	KY446871	Bistorta vivipara	Unspecified	duplicate_of_KY446874	SH1659867.08FU	k__Fungi;p__Basidiomycota;c__Agaricomycetes;o__Thelephorales;f__Thelephoraceae;g__Tomentella;s__Tomentella_sp	UCL8_000001
8114_722	KY446873	Bistorta vivipara	Unspecified	present_in	SH1659867.08FU	k__Fungi;p__Basidiomycota;c__Agaricomycetes;o__Thelephorales;f__Thelephoraceae;g__Tomentella;s__Tomentella_sp	UCL8_000001	k__Fungi;p__Basidiomycota;c__Agaricomycetes;o__Thelephorales
8114_723	KY446872	Bistorta vivipara	Unspecified	duplicate_of_KY446873	SH1659867.08FU	k__Fungi;p__Basidiomycota;c__Agaricomycetes;o__Thelephorales;f__Thelephoraceae;g__Tomentella;s__Tomentella_sp	UCL8_000001
8114_725	KY446870	Bistorta vivipara	Unspecified	present_in	SH1659867.08FU	k__Fungi;p__Basidiomycota;c__Agaricomycetes;o__Thelephorales;f__Thelephoraceae;g__Tomentella;s__Tomentella_sp	UCL8_000001	k__Fungi;p__Basidiomycota;c__Agaricomycetes;o__Thelephorales
8114_726	KY446869	Bistorta vivipara	Unspecified	present_in	SH1659867.08FU	k__Fungi;p__Basidiomycota;c__Agaricomycetes;o__Thelephorales;f__Thelephoraceae;g__Tomentella;s__Tomentella_sp	UCL8_000001	k__Fungi;p__Basidiomycota;c__Agaricomycetes;o__Thelephorales
8114_729	KY446866	Bistorta vivipara	Unspecified	present_in	SH1659867.08FU	k__Fungi;p__Basidiomycota;c__Agaricomycetes;o__Thelephorales;f__Thelephoraceae;g__Tomentella;s__Tomentella_sp	UCL8_000001	k__Fungi;p__Basidiomycota;c__Agaricomycetes;o__Thelephorales
8114_730	KY446865	Bistorta vivipara	Unspecified	present_in	SH1659867.08FU	k__Fungi;p__Basidiomycota;c__Agaricomycetes;o__Thelephorales;f__Thelephoraceae;g__Tomentella;s__Tomentella_sp	UCL8_000001	k__Fungi;p__Basidiomycota;c__Agaricomycetes;o__Thelephorales
8114_731	KY446864	Bistorta vivipara	Unspecified	present_in	SH1659867.08FU	k__Fungi;p__Basidiomycota;c__Agaricomycetes;o__Thelephorales;f__Thelephoraceae;g__Tomentella;s__Tomentella_sp	UCL8_000001	k__Fungi;p__Basidiomycota;c__Agaricomycetes;o__Thelephorales
8114_732	KY446863	Bistorta vivipara	Unspecified	present_in	SH1659867.08FU	k__Fungi;p__Basidiomycota;c__Agaricomycetes;o__Thelephorales;f__Thelephoraceae;g__Tomentella;s__Tomentella_sp	UCL8_000001	k__Fungi;p__Basidiomycota;c__Agaricomycetes;o__Thelephorales
8114_737	KY446858	Bistorta vivipara	Unspecified	duplicate_of_KY446863	SH1659867.08FU	k__Fungi;p__Basidiomycota;c__Agaricomycetes;o__Thelephorales;f__Thelephoraceae;g__Tomentella;s__Tomentella_sp	UCL8_000001
8114_738	KY446857	Bistorta vivipara	Unspecified	duplicate_of_KY446863	SH1659867.08FU	k__Fungi;p__Basidiomycota;c__Agaricomycetes;o__Thelephorales;f__Thelephoraceae;g__Tomentella;s__Tomentella_sp	UCL8_000001
8114_733	KY446862	Bistorta vivipara	Unspecified	present_in	SH1659867.08FU	k__Fungi;p__Basidiomycota;c__Agaricomycetes;o__Thelephorales;f__Thelephoraceae;g__Tomentella;s__Tomentella_sp	UCL8_000001	k__Fungi;p__Basidiomycota;c__Agaricomycetes;o__Thelephorales
8114_734	KY446861	Bistorta vivipara	Unspecified	present_in	SH1659867.08FU	k__Fungi;p__Basidiomycota;c__Agaricomycetes;o__Thelephorales;f__Thelephoraceae;g__Tomentella;s__Tomentella_sp	UCL8_000001	k__Fungi;p__Basidiomycota;c__Agaricomycetes;o__Thelephorales
8114_735	KY446860	Bistorta vivipara	Unspecified	present_in	SH1659867.08FU	k__Fungi;p__Basidiomycota;c__Agaricomycetes;o__Thelephorales;f__Thelephoraceae;g__Tomentella;s__Tomentella_sp	UCL8_000001	k__Fungi;p__Basidiomycota;c__Agaricomycetes;o__Thelephorales
8114_739	KY446856	Bistorta vivipara	Unspecified	present_in	SH1659867.08FU	k__Fungi;p__Basidiomycota;c__Agaricomycetes;o__Thelephorales;f__Thelephoraceae;g__Tomentella;s__Tomentella_sp	UCL8_000001	k__Fungi;p__Basidiomycota;c__Agaricomycetes;o__Thelephorales
8114_736	KY446859	Bistorta vivipara	Unspecified	present_in	SH1659867.08FU	k__Fungi;p__Basidiomycota;c__Agaricomycetes;o__Thelephorales;f__Thelephoraceae;g__Tomentella;s__Tomentella_sp	UCL8_000001	k__Fungi;p__Basidiomycota;c__Agaricomycetes;o__Thelephorales
8114_740	KY446855	Bistorta vivipara	Unspecified	new_sh_in	104	k__Fungi;p__Basidiomycota;c__Agaricomycetes;o__Thelephorales	UCL8_000001	k__Fungi;p__Basidiomycota;c__Agaricomycetes;o__Thelephorales
8114_741	KY446854	Bistorta vivipara	Unspecified	new_sh_in	104	k__Fungi;p__Basidiomycota;c__Agaricomycetes;o__Thelephorales	UCL8_000001	k__Fungi;p__Basidiomycota;c__Agaricomycetes;o__Thelephorales
8114_743	KY446852	Bistorta vivipara	Unspecified	present_in	SH1682200.08FU	k__Fungi;p__Basidiomycota;c__Agaricomycetes;o__Sebacinales;f__Sebacinaceae;g__Sebacina;s__Sebacina_sp	UCL8_003407	k__Fungi;p__Basidiomycota;c__Agaricomycetes;o__Sebacinales
8114_742	KY446853	Bistorta vivipara	Unspecified	new_sh_in	104	k__Fungi;p__Basidiomycota;c__Agaricomycetes;o__Thelephorales	UCL8_000001	k__Fungi;p__Basidiomycota;c__Agaricomycetes;o__Thelephorales
8114_744	KY446851	Bistorta vivipara	Unspecified	present_in	SH1682200.08FU	k__Fungi;p__Basidiomycota;c__Agaricomycetes;o__Sebacinales;f__Sebacinaceae;g__Sebacina;s__Sebacina_sp	UCL8_003407	k__Fungi;p__Basidiomycota;c__Agaricomycetes;o__Sebacinales
8114_745	KY446850	Bistorta vivipara	Unspecified	present_in	SH1682200.08FU	k__Fungi;p__Basidiomycota;c__Agaricomycetes;o__Sebacinales;f__Sebacinaceae;g__Sebacina;s__Sebacina_sp	UCL8_003407	k__Fungi;p__Basidiomycota;c__Agaricomycetes;o__Sebacinales
8114_746	KY446849	Bistorta vivipara	Unspecified	present_in	SH1682200.08FU	k__Fungi;p__Basidiomycota;c__Agaricomycetes;o__Sebacinales;f__Sebacinaceae;g__Sebacina;s__Sebacina_sp	UCL8_003407	k__Fungi;p__Basidiomycota;c__Agaricomycetes;o__Sebacinales
8114_747	KY446848	Bistorta vivipara	Unspecified	present_in	SH1682199.08FU	k__Fungi;p__Basidiomycota;c__Agaricomycetes;o__Sebacinales;f__Sebacinaceae;g__Sebacina;s__Sebacina_sp	UCL8_003407	k__Fungi;p__Basidiomycota;c__Agaricomycetes;o__Sebacinales
8114_748	KY446847	Bistorta vivipara	Unspecified	duplicate_of_KY446848	SH1682199.08FU	k__Fungi;p__Basidiomycota;c__Agaricomycetes;o__Sebacinales;f__Sebacinaceae;g__Sebacina;s__Sebacina_sp	UCL8_003407
8114_751	KY446844	Bistorta vivipara	Unspecified	present_in	SH1682200.08FU	k__Fungi;p__Basidiomycota;c__Agaricomycetes;o__Sebacinales;f__Sebacinaceae;g__Sebacina;s__Sebacina_sp	UCL8_003407	k__Fungi;p__Basidiomycota;c__Agaricomycetes;o__Sebacinales
8114_749	KY446846	Bistorta vivipara	Unspecified	present_in	SH1682199.08FU	k__Fungi;p__Basidiomycota;c__Agaricomycetes;o__Sebacinales;f__Sebacinaceae;g__Sebacina;s__Sebacina_sp	UCL8_003407	k__Fungi;p__Basidiomycota;c__Agaricomycetes;o__Sebacinales
8114_750	KY446845	Bistorta vivipara	Unspecified	duplicate_of_KY446846	SH1682199.08FU	k__Fungi;p__Basidiomycota;c__Agaricomycetes;o__Sebacinales;f__Sebacinaceae;g__Sebacina;s__Sebacina_sp	UCL8_003407
8114_752	KY446843	Bistorta vivipara	Unspecified	present_in	SH1800251.08FU	k__Fungi;p__Basidiomycota;c__Agaricomycetes;o__Sebacinales;f__Sebacinaceae;g__Sebacina;s__Sebacina_incrustans	UCL8_010859	k__Fungi;p__Basidiomycota;c__Agaricomycetes;o__Sebacinales
8114_753	KY446842	Bistorta vivipara	Unspecified	present_in	SH1800251.08FU	k__Fungi;p__Basidiomycota;c__Agaricomycetes;o__Sebacinales;f__Sebacinaceae;g__Sebacina;s__Sebacina_incrustans	UCL8_010859	k__Fungi;p__Basidiomycota;c__Agaricomycetes;o__Sebacinales
8114_754	KY446841	Bistorta vivipara	Unspecified	present_in	SH1702069.08FU	k__Fungi;p__Basidiomycota;c__Agaricomycetes;o__Russulales;f__Russulaceae;g__Russula;s__Russula_lilacea	UCL8_004930	k__Fungi;p__Basidiomycota;c__Agaricomycetes;o__Russulales
8114_755	KY446840	Bistorta vivipara	Unspecified	present_in	SH1702069.08FU	k__Fungi;p__Basidiomycota;c__Agaricomycetes;o__Russulales;f__Russulaceae;g__Russula;s__Russula_lilacea	UCL8_004930	k__Fungi;p__Basidiomycota;c__Agaricomycetes;o__Russulales
8114_756	KY446839	Bistorta vivipara	Unspecified	present_in	SH2751345.08FU	k__Fungi;p__Ascomycota;c__Pezizomycetes;o__Pezizales;f__Pezizaceae;g__unidentified;s__Pezizaceae_sp	UCL8_021081	k__Fungi;p__Ascomycota;c__Pezizomycetes;o__Pezizales
8114_757	KY446838	Bistorta vivipara	Unspecified	present_in	SH2751345.08FU	k__Fungi;p__Ascomycota;c__Pezizomycetes;o__Pezizales;f__Pezizaceae;g__unidentified;s__Pezizaceae_sp	UCL8_021081	k__Fungi;p__Ascomycota;c__Pezizomycetes;o__Pezizales
8114_758	KY446837	Bistorta vivipara	Unspecified	present_in	SH2751345.08FU	k__Fungi;p__Ascomycota;c__Pezizomycetes;o__Pezizales;f__Pezizaceae;g__unidentified;s__Pezizaceae_sp	UCL8_021081	k__Fungi;p__Ascomycota;c__Pezizomycetes;o__Pezizales
8114_759	KY446836	Bistorta vivipara	Unspecified	present_in	SH2751345.08FU	k__Fungi;p__Ascomycota;c__Pezizomycetes;o__Pezizales;f__Pezizaceae;g__unidentified;s__Pezizaceae_sp	UCL8_021081	k__Fungi;p__Ascomycota;c__Pezizomycetes;o__Pezizales
8114_760	KY446835	Bistorta vivipara	Unspecified	present_in	SH2751345.08FU	k__Fungi;p__Ascomycota;c__Pezizomycetes;o__Pezizales;f__Pezizaceae;g__unidentified;s__Pezizaceae_sp	UCL8_021081	k__Fungi;p__Ascomycota;c__Pezizomycetes;o__Pezizales
8114_765	KY446830	Bistorta vivipara	Unspecified	duplicate_of_KY446835	SH2751345.08FU	k__Fungi;p__Ascomycota;c__Pezizomycetes;o__Pezizales;f__Pezizaceae;g__unidentified;s__Pezizaceae_sp	UCL8_021081
8114_761	KY446834	Bistorta vivipara	Unspecified	present_in	SH2751345.08FU	k__Fungi;p__Ascomycota;c__Pezizomycetes;o__Pezizales;f__Pezizaceae;g__unidentified;s__Pezizaceae_sp	UCL8_021081	k__Fungi;p__Ascomycota;c__Pezizomycetes;o__Pezizales
8114_762	KY446833	Bistorta vivipara	Unspecified	present_in	SH2751345.08FU	k__Fungi;p__Ascomycota;c__Pezizomycetes;o__Pezizales;f__Pezizaceae;g__unidentified;s__Pezizaceae_sp	UCL8_021081	k__Fungi;p__Ascomycota;c__Pezizomycetes;o__Pezizales
8114_763	KY446832	Bistorta vivipara	Unspecified	present_in	SH2751345.08FU	k__Fungi;p__Ascomycota;c__Pezizomycetes;o__Pezizales;f__Pezizaceae;g__unidentified;s__Pezizaceae_sp	UCL8_021081	k__Fungi;p__Ascomycota;c__Pezizomycetes;o__Pezizales
8114_764	KY446831	Bistorta vivipara	Unspecified	present_in	SH2751345.08FU	k__Fungi;p__Ascomycota;c__Pezizomycetes;o__Pezizales;f__Pezizaceae;g__unidentified;s__Pezizaceae_sp	UCL8_021081	k__Fungi;p__Ascomycota;c__Pezizomycetes;o__Pezizales
8114_766	KY446829	Bistorta vivipara	Unspecified	new_sh_in	105	k__Fungi;p__Basidiomycota;c__Agaricomycetes;o__Agaricales	UCL8_006776	k__Fungi;p__Basidiomycota;c__Agaricomycetes;o__Agaricales
8114_767	MF908457	Bistorta vivipara	Unspecified	new_sh_in	106	k__Fungi;p__Ascomycota;c__Dothideomycetes;o__Capnodiales	UCL8_009173	k__Fungi;p__Ascomycota;c__Dothideomycetes;o__Capnodiales
8114_768	MF908456	Bistorta vivipara	Unspecified	present_in	SH1840387.08FU	k__Fungi;p__Basidiomycota;c__Agaricomycetes;o__Agaricales;f__Tricholomataceae;g__Clitocybe;s__Clitocybe_metachroa	UCL8_013235	k__Fungi;p__Basidiomycota;c__Agaricomycetes;o__Agaricales
8114_769	MF908455	Bistorta vivipara	Unspecified	new_sh_in	107	k__Fungi;p__Basidiomycota;c__Malasseziomycetes;o__Malasseziales	UCL8_002036	k__Fungi;p__Basidiomycota;c__Malasseziomycetes;o__Malasseziales
8114_770	MF908454	Bistorta vivipara	Unspecified	present_in	SH2757668.08FU	k__Fungi;p__unidentified;c__unidentified;o__unidentified;f__unidentified;g__unidentified;s__Fungi_sp	UCL8_005775	k__Fungi;p__Basidiomycota;c__Tremellomycetes;o__Tremellales
8114_772	MF908452	Bistorta vivipara	Unspecified	new_sh_in	79	k__Fungi;p__Basidiomycota;c__Agaricomycetes;o__Sebacinales	UCL8_007582	k__Fungi;p__Basidiomycota;c__Agaricomycetes;o__Sebacinales
8114_774	MF908450	Bistorta vivipara	Unspecified	present_in	SH1675128.08FU	k__Fungi;p__Basidiomycota;c__Agaricomycetes;o__Agaricales;f__Tricholomataceae;g__Clitocybula;s__Clitocybula_abundans	UCL8_001989	k__Fungi;p__Basidiomycota;c__Agaricomycetes;o__Agaricales
8114_777	MF908447	Bistorta vivipara	Unspecified	present_in	SH1744611.08FU	k__Fungi;p__Ascomycota;c__Dothideomycetes;o__Capnodiales;f__Mycosphaerellaceae;g__Mycosphaerella;s__Mycosphaerella_tassiana	UCL8_008694	k__Fungi;p__Ascomycota;c__Dothideomycetes;o__Capnodiales
8114_778	MF908446	Bistorta vivipara	Unspecified	present_in	SH2786168.08FU	k__Fungi;p__Ascomycota;c__Pezizomycetes;o__Pezizales;f__Pyronemataceae;g__Wilcoxina;s__Wilcoxina_sp	UCL8_007232	k__Fungi;p__Ascomycota;c__Pezizomycetes;o__Pezizales
8114_779	MF908445	Bistorta vivipara	Unspecified	new_sh_in	80	k__Fungi;p__Basidiomycota;c__Agaricomycetes;o__Thelephorales	UCL8_000001	k__Fungi;p__Basidiomycota;c__Agaricomycetes;o__Thelephorales
8114_780	MF908443	Bistorta vivipara	Unspecified	present_in	SH1709125.08FU	k__Fungi;p__Basidiomycota;c__Agaricomycetes;o__Sebacinales;f__Serendipitaceae;g__Serendipita;s__Serendipita_sp	UCL8_005845	k__Fungi;p__Basidiomycota;c__Agaricomycetes;o__Sebacinales
8114_784	MF908437	Bistorta vivipara	Unspecified	present_in	SH1712406.08FU	k__Fungi;p__Ascomycota;c__Dothideomycetes;o__Pleosporales;f__Didymellaceae;g__Epicoccum;s__Epicoccum_nigrum	UCL8_006198	k__Fungi;p__Ascomycota;c__Dothideomycetes;o__Pleosporales
8114_785	MK614865	Bistorta vivipara	Norway	present_in	SH2760055.08FU	k__Fungi;p__Ascomycota;c__Leotiomycetes;o__Helotiales;f__unidentified;g__unidentified;s__Helotiales_sp	UCL8_003680	k__Fungi;p__Ascomycota;c__Leotiomycetes;o__Helotiales
8114_786	MK614864	Bistorta vivipara	Norway	present_in	SH2760056.08FU	k__Fungi;p__Ascomycota;c__Lecanoromycetes;o__unidentified;f__unidentified;g__unidentified;s__Lecanoromycetes_sp	UCL8_006594	k__Fungi;p__Ascomycota;c__Lecanoromycetes;o__Lecanorales
8114_787	MK614863	Bistorta vivipara	Norway	new_sh_in	108	k__Fungi;p__Ascomycota;c__Eurotiomycetes;o__Chaetothyriales	UCL8_008184	k__Fungi;p__Ascomycota;c__Eurotiomycetes;o__Chaetothyriales
8114_789	MK614861	Bistorta vivipara	Norway	new_sh_in	109	k__Fungi;p__Ascomycota;c__Eurotiomycetes;o__Chaetothyriales	UCL8_006276	k__Fungi;p__Ascomycota;c__Eurotiomycetes;o__Chaetothyriales
8114_790	MK614860	Bistorta vivipara	Norway	present_in	SH1673896.08FU	k__Fungi;p__Basidiomycota;c__Agaricomycetes;o__Cantharellales;f__Cantharellales_fam_Incertae_sedis;g__Sistotrema;s__Sistotrema_brinkmannii	UCL8_001749	k__Fungi;p__Basidiomycota;c__Agaricomycetes;o__Cantharellales
8114_791	MK614859	Bistorta vivipara	Norway	present_in	SH1840370.08FU	k__Fungi;p__Basidiomycota;c__Agaricomycetes;o__Agaricales;f__Tricholomataceae;g__Clitocybe;s__Clitocybe_nebularis	UCL8_013235	k__Fungi;p__Basidiomycota;c__Agaricomycetes;o__Agaricales
8114_792	MK614858	Bistorta vivipara	Norway	present_in	SH2760057.08FU	k__Fungi;p__Basidiomycota;c__Agaricomycetes;o__Russulales;f__Russulaceae;g__unidentified;s__Russulaceae_sp	UCL8_009060	k__Fungi;p__Basidiomycota;c__Agaricomycetes;o__Russulales
8114_793	MK614857	Bistorta vivipara	Norway	new_sh_in	110	k__Fungi;p__Basidiomycota;c__Agaricomycetes;o__Agaricales	UCL8_013274	k__Fungi;p__Basidiomycota;c__Agaricomycetes;o__Agaricales
8114_794	MK614856	Bistorta vivipara	Norway	present_in	SH2760058.08FU	k__Fungi;p__Ascomycota;c__Leotiomycetes;o__Helotiales;f__unidentified;g__unidentified;s__Helotiales_sp	UCL8_000858	k__Fungi;p__Ascomycota;c__Leotiomycetes;o__Thelebolales
8114_796	MK614854	Bistorta vivipara	Norway	present_in	SH2760059.08FU	k__Fungi;p__Ascomycota;c__Leotiomycetes;o__Helotiales;f__unidentified;g__unidentified;s__Helotiales_sp	UCL8_000858	k__Fungi;p__Ascomycota;c__Leotiomycetes;o__Thelebolales
8114_797	MK614853	Bistorta vivipara	Norway	new_sh_in	111	k__Fungi;p__Basidiomycota;c__Agaricomycetes;o__Polyporales	UCL8_007692	k__Fungi;p__Basidiomycota;c__Agaricomycetes;o__Polyporales
8114_798	MK614852	Bistorta vivipara	Norway	new_sh_in	112	k__Fungi;p__Basidiomycota;c__Agaricomycetes;o__Agaricales	UCL8_000216	k__Fungi;p__Basidiomycota;c__Agaricomycetes;o__Agaricales
8114_799	MK614851	Bistorta vivipara	Norway	present_in	SH2760061.08FU	k__Fungi;p__Chytridiomycota;c__Chytridiomycetes;o__Chytridiales;f__unidentified;g__unidentified;s__Chytridiales_sp	UCL8_006980	k__Fungi;p__Chytridiomycota;c__Chytridiomycetes;o__Chytridiales
8114_800	MK614850	Bistorta vivipara	Norway	present_in	SH2760062.08FU	k__Fungi;p__Ascomycota;c__Leotiomycetes;o__Helotiales;f__unidentified;g__unidentified;s__Helotiales_sp	UCL8_007215	k__Fungi;p__Ascomycota;c__Leotiomycetes;o__Helotiales
8114_801	MK614849	Bistorta vivipara	Norway	new_sh_in	113	k__Fungi;p__Ascomycota;c__Leotiomycetes;o__Thelebolales	UCL8_000858	k__Fungi;p__Ascomycota;c__Leotiomycetes;o__Thelebolales
8114_802	MK614848	Bistorta vivipara	Norway	present_in	SH1841035.08FU	k__Fungi;p__Basidiomycota;c__Agaricomycetes;o__Cantharellales;f__Clavulinaceae;g__unidentified;s__Clavulinaceae_sp	UCL8_013298	k__Fungi;p__Basidiomycota;c__Agaricomycetes;o__Cantharellales
8114_804	MK614846	Bistorta vivipara	Norway	new_sh_in	114	k__Fungi;p__Basidiomycota;c__Agaricomycetes;o__Thelephorales	UCL8_000001	k__Fungi;p__Basidiomycota;c__Agaricomycetes;o__Thelephorales
8114_803	MK614847	Bistorta vivipara	Norway	present_in	SH1661723.08FU	k__Fungi;p__Basidiomycota;c__Agaricomycetes;o__Agaricales;f__Cortinariaceae;g__Cortinarius;s__Cortinarius_alpinus	UCL8_000003	k__Fungi;p__Basidiomycota;c__Agaricomycetes;o__Agaricales
8114_805	MK614845	Bistorta vivipara	Norway	present_in	SH2760063.08FU	k__Fungi;p__Ascomycota;c__Geoglossomycetes;o__Geoglossales;f__Geoglossaceae;g__unidentified;s__Geoglossaceae_sp	UCL8_007675	k__Fungi;p__Ascomycota;c__Geoglossomycetes;o__Geoglossales
8114_806	MK614844	Bistorta vivipara	Norway	new_sh_in	115	k__Fungi;p__Ascomycota;c__Leotiomycetes;o__Helotiales	UCL8_003736	k__Fungi;p__Ascomycota;c__Leotiomycetes;o__Helotiales
8114_808	MK614842	Bistorta vivipara	Norway	new_sh_in	116	k__Fungi;p__Basidiomycota;c__Agaricomycetes;o__Cantharellales	UCL8_006077	k__Fungi;p__Basidiomycota;c__Agaricomycetes;o__Cantharellales
8114_807	MK614843	Bistorta vivipara	Norway	present_in	SH1840395.08FU	k__Fungi;p__Basidiomycota;c__Agaricomycetes;o__Agaricales;f__Tricholomataceae;g__unidentified;s__Tricholomataceae_sp	UCL8_013235	k__Fungi;p__Basidiomycota;c__Agaricomycetes;o__Agaricales
8114_810	MK614840	Bistorta vivipara	Norway	new_sh_in	117	k__Fungi;p__Ascomycota;c__Pezizomycetes;o__Pezizales	UCL8_011133	k__Fungi;p__Ascomycota;c__Pezizomycetes;o__Pezizales
8114_809	MK614841	Bistorta vivipara	Norway	present_in	SH1839809.08FU	k__Fungi;p__Ascomycota;c__Leotiomycetes;o__Helotiales;f__Vibrisseaceae;g__Phialocephala;s__Phialocephala_fortinii	UCL8_013144	k__Fungi;p__Ascomycota;c__Leotiomycetes;o__Helotiales
8114_812	MK614838	Bistorta vivipara	Norway	present_in	SH1685172.08FU	k__Fungi;p__Ascomycota;c__Leotiomycetes;o__Helotiales;f__Hyaloscyphaceae;g__Hyaloscypha;s__Hyaloscypha_finlandica	UCL8_003736	k__Fungi;p__Ascomycota;c__Leotiomycetes;o__Helotiales
8114_811	MK614839	Bistorta vivipara	Norway	present_in	SH1709959.08FU	k__Fungi;p__Basidiomycota;c__Agaricomycetes;o__Agaricales;f__Cortinariaceae;g__Cortinarius;s__Cortinarius_diasemospermus	UCL8_006008	k__Fungi;p__Basidiomycota;c__Agaricomycetes;o__Agaricales
8114_814	MK614836	Bistorta vivipara	Norway	present_in	SH1721887.08FU	k__Fungi;p__Ascomycota;c__Geoglossomycetes;o__Geoglossales;f__Geoglossaceae;g__Sarcoleotia;s__Sarcoleotia_globosa	UCL8_006935	k__Fungi;p__Ascomycota;c__Geoglossomycetes;o__Geoglossales
8114_813	MK614837	Bistorta vivipara	Norway	present_in	SH1719921.08FU	k__Fungi;p__Basidiomycota;c__Agaricomycetes;o__Agaricales;f__Hydnangiaceae;g__Laccaria;s__Laccaria_montana	UCL8_006776	k__Fungi;p__Basidiomycota;c__Agaricomycetes;o__Agaricales
8114_815	MK614835	Bistorta vivipara	Norway	present_in	SH2760064.08FU	k__Fungi;p__Basidiomycota;c__Agaricomycetes;o__Sebacinales;f__Serendipitaceae;g__Serendipita;s__Serendipita_sp	UCL8_009172	k__Fungi;p__Basidiomycota;c__Agaricomycetes;o__Sebacinales
8114_816	MK614834	Bistorta vivipara	Norway	present_in	SH1660016.08FU	k__Fungi;p__Basidiomycota;c__Agaricomycetes;o__Thelephorales;f__Thelephoraceae;g__Tomentella;s__Tomentella_sp	UCL8_000001	k__Fungi;p__Basidiomycota;c__Agaricomycetes;o__Thelephorales
8114_817	MK614833	Bistorta vivipara	Norway	present_in	SH1684137.08FU	k__Fungi;p__Ascomycota;c__Leotiomycetes;o__Helotiales;f__Hyaloscyphaceae;g__Lachnum;s__Lachnum_pygmaeum	UCL8_003680	k__Fungi;p__Ascomycota;c__Leotiomycetes;o__Helotiales
8114_818	MK614832	Bistorta vivipara	Norway	present_in	SH1840104.08FU	k__Fungi;p__Ascomycota;c__Sordariomycetes;o__Sordariales;f__unidentified;g__unidentified;s__Sordariales_sp	UCL8_013184	k__Fungi;p__Ascomycota;c__Sordariomycetes;o__Sordariales
8114_819	MK614831	Bistorta vivipara	Norway	new_sh_in	118	k__Fungi;p__Basidiomycota;c__Agaricomycetes;o__Sebacinales	UCL8_009172	k__Fungi;p__Basidiomycota;c__Agaricomycetes;o__Sebacinales
8114_820	MK614830	Bistorta vivipara	Norway	new_sh_in	119	k__Fungi;p__Basidiomycota;c__Agaricomycetes;o__Thelephorales	UCL8_000001	k__Fungi;p__Basidiomycota;c__Agaricomycetes;o__Thelephorales
8114_821	MK614829	Bistorta vivipara	Norway	present_in	SH1668603.08FU	k__Fungi;p__Ascomycota;c__Leotiomycetes;o__Helotiales;f__Leotiaceae;g__Pezoloma;s__Pezoloma_sp	UCL8_000858	k__Fungi;p__Ascomycota;c__Leotiomycetes;o__Thelebolales
8114_822	MK614828	Bistorta vivipara	Norway	present_in	SH1702039.08FU	k__Fungi;p__Basidiomycota;c__Agaricomycetes;o__Russulales;f__Russulaceae;g__Russula;s__Russula_pascua	UCL8_004930	k__Fungi;p__Basidiomycota;c__Agaricomycetes;o__Russulales
8114_823	MK614827	Bistorta vivipara	Norway	present_in	SH1710039.08FU	k__Fungi;p__Basidiomycota;c__Agaricomycetes;o__Agaricales;f__Cortinariaceae;g__Cortinarius;s__Cortinarius_pauperculus	UCL8_006008	k__Fungi;p__Basidiomycota;c__Agaricomycetes;o__Agaricales
8114_824	MK614826	Bistorta vivipara	Norway	present_in	SH1660158.08FU	k__Fungi;p__Basidiomycota;c__Agaricomycetes;o__Thelephorales;f__Thelephoraceae;g__unidentified;s__Thelephoraceae_sp	UCL8_000001	k__Fungi;p__Basidiomycota;c__Agaricomycetes;o__Thelephorales
8114_825	MK614825	Bistorta vivipara	Norway	present_in	SH2760065.08FU	k__Fungi;p__Basidiomycota;c__Agaricomycetes;o__Thelephorales;f__Thelephoraceae;g__Pseudotomentella;s__Pseudotomentella_sp	UCL8_007844	k__Fungi;p__Basidiomycota;c__Agaricomycetes;o__Thelephorales
8114_826	MK811003	Bistorta vivipara	Norway	new_sh_in	120	k__Fungi;p__Ascomycota;c__Dothideomycetes;o__Venturiales	UCL8_011330	k__Fungi;p__Ascomycota;c__Dothideomycetes;o__Venturiales
