# Supplementary material for: Host generalists dominate fungal communities associated with alpine knotweed roots: a study of Sebacinales
Source: PeerJ. 2022 Oct 5;10:e14047. doi: 10.7717/peerj.14047 (PMC9547586; doi:10.7717/peerj.14047)
Supplement: Supplemental Information 6 [file peerj-10-14047-s006.xlsx]

## Sheet: matches_out_99
seq_id_tmp	seq_accno	host	geography	status (1.0)	SH code (1.0)	SH/compound taxonomy (1.0)	compound_cl_code (1.0)
22_50	AF509964	Tilia_cordata	Austria	new_sh_in	26	k__Fungi;p__Basidiomycota;c__Agaricomycetes;o__Sebacinales	UCL8_007582
22_89	Serendipita__EU554899__sample	Populus	Canada	new_sh_in	28	k__Fungi;p__Basidiomycota;c__Agaricomycetes;o__Sebacinales	UCL8_009172
22_907	JX630409	Salix_arctica	Canada	new_sh_in	36	k__Fungi;p__Basidiomycota;c__Agaricomycetes;o__Sebacinales	UCL8_003407
22_1026	KC876350	Picea_glauca	Canada	new_sh_in	38	k__Fungi;p__Basidiomycota;c__Agaricomycetes;o__Sebacinales	UCL8_007582
22_350	JQ318666	Quercus_liaotungensis	China	new_singleton_in	s5	k__Fungi;p__Basidiomycota;c__Agaricomycetes;o__Sebacinales	UCL8_007582
22_913	JF748100	Quercus_wutaishanica	China	new_sh_in	36	k__Fungi;p__Basidiomycota;c__Agaricomycetes;o__Sebacinales	UCL8_003407
22_359	Sebacina__UDB014607__sample	Bistorta_vivipara	Estonia	new_sh_in	30	k__Fungi;p__Basidiomycota;c__Agaricomycetes;o__Sebacinales	UCL8_007582
22_712	Sebacina__UDB025971__Salix_caprea_sample	Salix_caprea	Estonia	new_sh_in	33	k__Fungi;p__Basidiomycota;c__Agaricomycetes;o__Sebacinales	UCL8_008621
22_80	EF611157	Tilia	Finland	new_sh_in	27	k__Fungi;p__Basidiomycota;c__Agaricomycetes;o__Sebacinales	UCL8_009172
22_615	Sebacina__UDB026852__Dryas_octopetala_sample	Dryas_octopetala	Finland	new_sh_in	32	k__Fungi;p__Basidiomycota;c__Agaricomycetes;o__Sebacinales	UCL8_007582
22_5	Sebacina__KM247627		France	new_sh_in	26	k__Fungi;p__Basidiomycota;c__Agaricomycetes;o__Sebacinales	UCL8_007582
22_911	AF440660	Neottia_nidus-avis	France	new_sh_in	36	k__Fungi;p__Basidiomycota;c__Agaricomycetes;o__Sebacinales	UCL8_003407
22_3	KF000638	Bistorta_vivipara	Germany	new_sh_in	26	k__Fungi;p__Basidiomycota;c__Agaricomycetes;o__Sebacinales	UCL8_007582
22_6	KF000568	Bistorta_vivipara	Germany	new_sh_in	26	k__Fungi;p__Basidiomycota;c__Agaricomycetes;o__Sebacinales	UCL8_007582
22_8	KF000501	Bistorta_vivipara	Germany	new_sh_in	26	k__Fungi;p__Basidiomycota;c__Agaricomycetes;o__Sebacinales	UCL8_007582
22_7	KF000497	Bistorta_vivipara	Germany	new_sh_in	26	k__Fungi;p__Basidiomycota;c__Agaricomycetes;o__Sebacinales	UCL8_007582
22_10	KF000503	Bistorta_vivipara	Germany	duplicate_of_KF000497|Bistorta_vivipara|Germany	26	k__Fungi;p__Basidiomycota;c__Agaricomycetes;o__Sebacinales	UCL8_007582
22_13	KF000507	Bistorta_vivipara	Germany	duplicate_of_KF000497|Bistorta_vivipara|Germany	26	k__Fungi;p__Basidiomycota;c__Agaricomycetes;o__Sebacinales	UCL8_007582
22_9	KF000502	Bistorta_vivipara	Germany	new_sh_in	26	k__Fungi;p__Basidiomycota;c__Agaricomycetes;o__Sebacinales	UCL8_007582
22_11	KF000504	Bistorta_vivipara	Germany	new_sh_in	26	k__Fungi;p__Basidiomycota;c__Agaricomycetes;o__Sebacinales	UCL8_007582
22_12	KF000505	Bistorta_vivipara	Germany	new_sh_in	26	k__Fungi;p__Basidiomycota;c__Agaricomycetes;o__Sebacinales	UCL8_007582
22_14	KF000685	Bistorta_vivipara	Germany	new_sh_in	26	k__Fungi;p__Basidiomycota;c__Agaricomycetes;o__Sebacinales	UCL8_007582
22_17	KF000498	Bistorta_vivipara	Germany	new_sh_in	26	k__Fungi;p__Basidiomycota;c__Agaricomycetes;o__Sebacinales	UCL8_007582
22_19	KF000506	Bistorta_vivipara	Germany	duplicate_of_KF000498|Bistorta_vivipara|Germany	26	k__Fungi;p__Basidiomycota;c__Agaricomycetes;o__Sebacinales	UCL8_007582
22_23	KF000639	Bistorta_vivipara	Germany	duplicate_of_KF000498|Bistorta_vivipara|Germany	26	k__Fungi;p__Basidiomycota;c__Agaricomycetes;o__Sebacinales	UCL8_007582
22_24	KF000643	Bistorta_vivipara	Germany	duplicate_of_KF000498|Bistorta_vivipara|Germany	26	k__Fungi;p__Basidiomycota;c__Agaricomycetes;o__Sebacinales	UCL8_007582
22_25	KF000644	Bistorta_vivipara	Germany	duplicate_of_KF000498|Bistorta_vivipara|Germany	26	k__Fungi;p__Basidiomycota;c__Agaricomycetes;o__Sebacinales	UCL8_007582
22_20	KF000509	Bistorta_vivipara	Germany	new_sh_in	26	k__Fungi;p__Basidiomycota;c__Agaricomycetes;o__Sebacinales	UCL8_007582
22_18	KF000499	Bistorta_vivipara	Germany	new_sh_in	26	k__Fungi;p__Basidiomycota;c__Agaricomycetes;o__Sebacinales	UCL8_007582
22_21	KF000603	Bistorta_vivipara	Germany	new_sh_in	26	k__Fungi;p__Basidiomycota;c__Agaricomycetes;o__Sebacinales	UCL8_007582
22_26	KF000647	Bistorta_vivipara	Germany	new_sh_in	26	k__Fungi;p__Basidiomycota;c__Agaricomycetes;o__Sebacinales	UCL8_007582
22_27	KF000648	Bistorta_vivipara	Germany	new_sh_in	26	k__Fungi;p__Basidiomycota;c__Agaricomycetes;o__Sebacinales	UCL8_007582
22_28	KF000659	Bistorta_vivipara	Germany	new_sh_in	26	k__Fungi;p__Basidiomycota;c__Agaricomycetes;o__Sebacinales	UCL8_007582
22_31	KF000467	Bistorta_vivipara	Germany	new_sh_in	26	k__Fungi;p__Basidiomycota;c__Agaricomycetes;o__Sebacinales	UCL8_007582
22_32	KF000516	Bistorta_vivipara	Germany	duplicate_of_KF000467|Bistorta_vivipara|Germany	26	k__Fungi;p__Basidiomycota;c__Agaricomycetes;o__Sebacinales	UCL8_007582
22_34	KF000649	Bistorta_vivipara	Germany	new_sh_in	26	k__Fungi;p__Basidiomycota;c__Agaricomycetes;o__Sebacinales	UCL8_007582
22_35	KF000650	Bistorta_vivipara	Germany	duplicate_of_KF000649|Bistorta_vivipara|Germany	26	k__Fungi;p__Basidiomycota;c__Agaricomycetes;o__Sebacinales	UCL8_007582
22_33	KF000646	Bistorta_vivipara	Germany	new_sh_in	26	k__Fungi;p__Basidiomycota;c__Agaricomycetes;o__Sebacinales	UCL8_007582
22_36	KF000651	Bistorta_vivipara	Germany	new_sh_in	26	k__Fungi;p__Basidiomycota;c__Agaricomycetes;o__Sebacinales	UCL8_007582
22_52	KF000480	Bistorta_vivipara	Germany	duplicate_of_AF509964|Tilia_cordata|Austria	26	k__Fungi;p__Basidiomycota;c__Agaricomycetes;o__Sebacinales	UCL8_007582
22_53	KF000481	Bistorta_vivipara	Germany	duplicate_of_AF509964|Tilia_cordata|Austria	26	k__Fungi;p__Basidiomycota;c__Agaricomycetes;o__Sebacinales	UCL8_007582
22_54	KF000645	Bistorta_vivipara	Germany	new_sh_in	26	k__Fungi;p__Basidiomycota;c__Agaricomycetes;o__Sebacinales	UCL8_007582
22_58	HQ154228	Gymnadenia_conopsea	Germany	new_sh_in	26	k__Fungi;p__Basidiomycota;c__Agaricomycetes;o__Sebacinales	UCL8_007582
22_60	KF000637	Bistorta_vivipara	Germany	new_sh_in	26	k__Fungi;p__Basidiomycota;c__Agaricomycetes;o__Sebacinales	UCL8_007582
22_964	KF000458		Germany	new_sh_in	37	k__Fungi;p__Basidiomycota;c__Agaricomycetes;o__Sebacinales	UCL8_010859
22_29	Sebacina__UDB017506		Iran,_Islamic_Republic_of	new_sh_in	26	k__Fungi;p__Basidiomycota;c__Agaricomycetes;o__Sebacinales	UCL8_007582
22_45	Sebacina__UDB005802__sample	Fagaceae	Iran,_Islamic_Republic_of	new_sh_in	26	k__Fungi;p__Basidiomycota;c__Agaricomycetes;o__Sebacinales	UCL8_007582
22_41	Sebacina__UDB005414__sample	Fagaceae	Iran,_Islamic_Republic_of	new_sh_in	26	k__Fungi;p__Basidiomycota;c__Agaricomycetes;o__Sebacinales	UCL8_007582
22_708	HE687121		Iran,_Islamic_Republic_of	new_sh_in	33	k__Fungi;p__Basidiomycota;c__Agaricomycetes;o__Sebacinales	UCL8_008621
22_991	Sebacina__UDB017537		Iran,_Islamic_Republic_of	new_sh_in	26	k__Fungi;p__Basidiomycota;c__Agaricomycetes;o__Sebacinales	UCL8_007582
22_48	Sebacina__UDB026519__Cistus_salviifolius_sample	Cistus_salviifolius	Italy	new_sh_in	26	k__Fungi;p__Basidiomycota;c__Agaricomycetes;o__Sebacinales	UCL8_007582
22_51	JX625308		Italy	new_sh_in	26	k__Fungi;p__Basidiomycota;c__Agaricomycetes;o__Sebacinales	UCL8_007582
22_68	Sebacina__KT122782	Cephalanthera_damasonium	Italy	new_sh_in	26	k__Fungi;p__Basidiomycota;c__Agaricomycetes;o__Sebacinales	UCL8_007582
22_959	JX625324		Italy	new_sh_in	37	k__Fungi;p__Basidiomycota;c__Agaricomycetes;o__Sebacinales	UCL8_010859
22_1106	FJ556835	Anthemis_tinctoria	Italy	new_sh_in	40	k__Fungi;p__Basidiomycota;c__Agaricomycetes;o__Sebacinales	UCL8_003407
22_81	Serendipita__LC277085		Japan	new_sh_in	27	k__Fungi;p__Basidiomycota;c__Agaricomycetes;o__Sebacinales	UCL8_009172
22_109	LC003275	Cephalanthera_falcata	Japan	new_sh_in	29	k__Fungi;p__Basidiomycota;c__Agaricomycetes;o__Sebacinales	UCL8_007582
22_617	Sebacina__UDB014129__TU110860		Japan	new_sh_in	32	k__Fungi;p__Basidiomycota;c__Agaricomycetes;o__Sebacinales	UCL8_007582
22_1032	Sebacina__AB218156__sample	Quercus_mongolica_subsp._crispula	Japan	new_singleton_in	s6	k__Fungi;p__Basidiomycota;c__Agaricomycetes;o__Sebacinales	UCL8_007582
22_1153	LC523866	Abies_sachalinensis	Japan	new_singleton_in	s8	k__Fungi;p__Basidiomycota;c__Agaricomycetes;o__Sebacinales	UCL8_007582
22_71	Serendipita__DQ068978__sample	Pinus_sylvestris	Lithuania	new_sh_in	27	k__Fungi;p__Basidiomycota;c__Agaricomycetes;o__Sebacinales	UCL8_009172
22_4	KY322609		Montenegro	new_sh_in	26	k__Fungi;p__Basidiomycota;c__Agaricomycetes;o__Sebacinales	UCL8_007582
22_59	Sebacina__GU817078	Bistorta_vivipara	Norway	new_sh_in	26	k__Fungi;p__Basidiomycota;c__Agaricomycetes;o__Sebacinales	UCL8_007582
22_368	Sebacina__GU817092	Bistorta_vivipara	Norway	new_sh_in	31	k__Fungi;p__Basidiomycota;c__Agaricomycetes;o__Sebacinales	UCL8_007582
22_369	Sebacina__GU817093	Bistorta_vivipara	Norway	duplicate_of_Sebacina__GU817092|Bistorta_vivipara|Norway	31	k__Fungi;p__Basidiomycota;c__Agaricomycetes;o__Sebacinales	UCL8_007582
22_370	Sebacina__GU817094	Bistorta_vivipara	Norway	duplicate_of_Sebacina__GU817092|Bistorta_vivipara|Norway	31	k__Fungi;p__Basidiomycota;c__Agaricomycetes;o__Sebacinales	UCL8_007582
22_1105	Sebacina__HQ445489	Dryas_octopetala	Norway	new_sh_in	40	k__Fungi;p__Basidiomycota;c__Agaricomycetes;o__Sebacinales	UCL8_003407
22_1110	Sebacina__GU817204	Bistorta_vivipara	Norway	new_sh_in	40	k__Fungi;p__Basidiomycota;c__Agaricomycetes;o__Sebacinales	UCL8_003407
22_1056	KJ769302	Pinus_koraiensis	Russian_Federation	new_singleton_in	s7	k__Fungi;p__Basidiomycota;c__Agaricomycetes;o__Sebacinales	UCL8_003407
22_77	MK509781	Scots_pine	Slovakia	new_sh_in	27	k__Fungi;p__Basidiomycota;c__Agaricomycetes;o__Sebacinales	UCL8_009172
22_1041	FJ788845	Pterygodium_catholicum	South_Africa	new_sh_in	39	k__Fungi;p__Basidiomycota;c__Agaricomycetes;o__Sebacinales	UCL8_007058
22_79	Serendipita__KF156292		Sweden	new_sh_in	27	k__Fungi;p__Basidiomycota;c__Agaricomycetes;o__Sebacinales	UCL8_009172
22_56	Sebacina__KC818317		Switzerland	new_sh_in	26	k__Fungi;p__Basidiomycota;c__Agaricomycetes;o__Sebacinales	UCL8_007582
22_57	Sebacina__KC818323		Switzerland	duplicate_of_Sebacina__KC818317||Switzerland	26	k__Fungi;p__Basidiomycota;c__Agaricomycetes;o__Sebacinales	UCL8_007582
22_37	Sebacina__UDB004909__sample	Cedrus_libani	Turkey	new_sh_in	26	k__Fungi;p__Basidiomycota;c__Agaricomycetes;o__Sebacinales	UCL8_007582
22_935	EU668219	Fagus_sylvatica	United_Kingdom	new_sh_in	36	k__Fungi;p__Basidiomycota;c__Agaricomycetes;o__Sebacinales	UCL8_003407
22_360	JF304351		United_States	new_sh_in	31	k__Fungi;p__Basidiomycota;c__Agaricomycetes;o__Sebacinales	UCL8_007582
22_363	JX630493	Dryas_integrifolia	United_States	new_sh_in	31	k__Fungi;p__Basidiomycota;c__Agaricomycetes;o__Sebacinales	UCL8_007582
22_810	JX630731	Dryas_integrifolia	United_States	new_sh_in	34	k__Fungi;p__Basidiomycota;c__Agaricomycetes;o__Sebacinales	UCL8_007582
22_881	JQ393117		United_States	new_sh_in	35	k__Fungi;p__Basidiomycota;c__Agaricomycetes;o__Sebacinales	UCL8_002190
22_898	EF417818	Quercus_wislizeni	United_States	new_sh_in	35	k__Fungi;p__Basidiomycota;c__Agaricomycetes;o__Sebacinales	UCL8_002190
22_906	JX630398	Salix_arctica	United_States	new_sh_in	36	k__Fungi;p__Basidiomycota;c__Agaricomycetes;o__Sebacinales	UCL8_003407
22_55	Sebacina__FJ792845	Dryas_octopetala_TUB_019111	Unspecified	duplicate_of_AF509964|Tilia_cordata|Austria	26	k__Fungi;p__Basidiomycota;c__Agaricomycetes;o__Sebacinales	UCL8_007582
22_70	JX844772	Fagus_sylvatica	Unspecified	new_sh_in	27	k__Fungi;p__Basidiomycota;c__Agaricomycetes;o__Sebacinales	UCL8_009172
22_75	JX844773	Fagus_sylvatica	Unspecified	new_sh_in	27	k__Fungi;p__Basidiomycota;c__Agaricomycetes;o__Sebacinales	UCL8_009172
22_74	JX844775	Fagus_sylvatica	Unspecified	new_sh_in	27	k__Fungi;p__Basidiomycota;c__Agaricomycetes;o__Sebacinales	UCL8_009172
22_78	JX844771	Fagus_sylvatica	Unspecified	new_sh_in	27	k__Fungi;p__Basidiomycota;c__Agaricomycetes;o__Sebacinales	UCL8_009172
22_1123	KX497200	Betula_albo-sinensis_Burk	Unspecified	new_sh_in	26	k__Fungi;p__Basidiomycota;c__Agaricomycetes;o__Sebacinales	UCL8_007582
22_1147	MF352772	Pinus_sylvestris	United_Kingdom	present_in	SH1675909.08FU	k__Fungi;p__Basidiomycota;c__Agaricomycetes;o__Sebacinales;f__Sebacinaceae;g__Helvellosebacina;s__Helvellosebacina_helvelloides	UCL8_002190
22_816	LC013788	Populus_simonii	China	present_in	SH1724477.08FU	k__Fungi;p__Basidiomycota;c__Agaricomycetes;o__Sebacinales;f__Sebacinaceae;g__Helvellosebacina;s__Helvellosebacina_sp	UCL8_007146
22_1061	KX444254	Quercus_liaotungensis	China	present_in	SH1724475.08FU	k__Fungi;p__Basidiomycota;c__Agaricomycetes;o__Sebacinales;f__Sebacinaceae;g__Helvellosebacina;s__Helvellosebacina_sp	UCL8_007146
22_880	Helvellosebacina__UDB014608__sample	Bistorta_vivipara	Estonia	present_in	SH1675903.08FU	k__Fungi;p__Basidiomycota;c__Agaricomycetes;o__Sebacinales;f__Sebacinaceae;g__Helvellosebacina;s__Helvellosebacina_sp	UCL8_002190
22_885	Helvellosebacina__UDB025947__Salix_caprea_sample	Salix_caprea	Estonia	present_in	SH1675903.08FU	k__Fungi;p__Basidiomycota;c__Agaricomycetes;o__Sebacinales;f__Sebacinaceae;g__Helvellosebacina;s__Helvellosebacina_sp	UCL8_002190
22_886	Helvellosebacina__UDB026048__Fagus_sylvatica_sample	Fagus_sylvatica	Estonia	duplicate_of_Helvellosebacina__UDB025947__Salix_caprea_sample|Salix_caprea|Estonia	SH1675903.08FU	k__Fungi;p__Basidiomycota;c__Agaricomycetes;o__Sebacinales;f__Sebacinaceae;g__Helvellosebacina;s__Helvellosebacina_sp	UCL8_002190
22_887	Helvellosebacina__UDB026282__Betula_pendula_sample	Betula_pendula	Estonia	duplicate_of_Helvellosebacina__UDB025947__Salix_caprea_sample|Salix_caprea|Estonia	SH1675903.08FU	k__Fungi;p__Basidiomycota;c__Agaricomycetes;o__Sebacinales;f__Sebacinaceae;g__Helvellosebacina;s__Helvellosebacina_sp	UCL8_002190
22_888	Helvellosebacina__UDB026293__Picea_abies_sample	Picea_abies	Estonia	duplicate_of_Helvellosebacina__UDB025947__Salix_caprea_sample|Salix_caprea|Estonia	SH1675903.08FU	k__Fungi;p__Basidiomycota;c__Agaricomycetes;o__Sebacinales;f__Sebacinaceae;g__Helvellosebacina;s__Helvellosebacina_sp	UCL8_002190
22_889	Helvellosebacina__UDB026299__Corylus_avellana_sample	Corylus_avellana	Estonia	duplicate_of_Helvellosebacina__UDB025947__Salix_caprea_sample|Salix_caprea|Estonia	SH1675903.08FU	k__Fungi;p__Basidiomycota;c__Agaricomycetes;o__Sebacinales;f__Sebacinaceae;g__Helvellosebacina;s__Helvellosebacina_sp	UCL8_002190
22_890	Helvellosebacina__UDB026464__Picea_abies_sample	Picea_abies	Estonia	duplicate_of_Helvellosebacina__UDB025947__Salix_caprea_sample|Salix_caprea|Estonia	SH1675903.08FU	k__Fungi;p__Basidiomycota;c__Agaricomycetes;o__Sebacinales;f__Sebacinaceae;g__Helvellosebacina;s__Helvellosebacina_sp	UCL8_002190
22_895	Helvellosebacina__UDB007960__sample	Angiospermae	Estonia	present_in	SH1675903.08FU	k__Fungi;p__Basidiomycota;c__Agaricomycetes;o__Sebacinales;f__Sebacinaceae;g__Helvellosebacina;s__Helvellosebacina_sp	UCL8_002190
22_896	Helvellosebacina__UDB007962__sample	Betula_pendula	Estonia	present_in	SH1675903.08FU	k__Fungi;p__Basidiomycota;c__Agaricomycetes;o__Sebacinales;f__Sebacinaceae;g__Helvellosebacina;s__Helvellosebacina_sp	UCL8_002190
22_884	Helvellosebacina__UDB009670__sample	Alnus_glutinosa	Iran,_Islamic_Republic_of	duplicate_of_Helvellosebacina__JN197776||Unspecified	SH1675920.08FU	k__Fungi;p__Basidiomycota;c__Agaricomycetes;o__Sebacinales;f__Sebacinaceae;g__Helvellosebacina;s__Helvellosebacina_sp	UCL8_002190
22_892	FR852346	Fagales	Iran,_Islamic_Republic_of	present_in	SH1675903.08FU	k__Fungi;p__Basidiomycota;c__Agaricomycetes;o__Sebacinales;f__Sebacinaceae;g__Helvellosebacina;s__Helvellosebacina_sp	UCL8_002190
22_893	HE687102		Iran,_Islamic_Republic_of	duplicate_of_FR852346|Fagales|Iran,_Islamic_Republic_of	SH1675903.08FU	k__Fungi;p__Basidiomycota;c__Agaricomycetes;o__Sebacinales;f__Sebacinaceae;g__Helvellosebacina;s__Helvellosebacina_sp	UCL8_002190
22_894	Helvellosebacina__UDB005612__sample	Fagaceae	Iran,_Islamic_Republic_of	duplicate_of_FR852346|Fagales|Iran,_Islamic_Republic_of	SH1675903.08FU	k__Fungi;p__Basidiomycota;c__Agaricomycetes;o__Sebacinales;f__Sebacinaceae;g__Helvellosebacina;s__Helvellosebacina_sp	UCL8_002190
22_882	HF565086	Quercus_ruber	Italy	present_in	SH1675903.08FU	k__Fungi;p__Basidiomycota;c__Agaricomycetes;o__Sebacinales;f__Sebacinaceae;g__Helvellosebacina;s__Helvellosebacina_sp	UCL8_002190
22_891	HM370473	Ostrya_carpinifolia_Scop.	Italy	present_in	SH1675903.08FU	k__Fungi;p__Basidiomycota;c__Agaricomycetes;o__Sebacinales;f__Sebacinaceae;g__Helvellosebacina;s__Helvellosebacina_sp	UCL8_002190
22_897	Helvellosebacina__UDB026615__Cistus_monspeliensis_sample	Cistus_monspeliensis	Morocco	present_in	SH1675903.08FU	k__Fungi;p__Basidiomycota;c__Agaricomycetes;o__Sebacinales;f__Sebacinaceae;g__Helvellosebacina;s__Helvellosebacina_sp	UCL8_002190
22_883	Helvellosebacina__JN197776		Unspecified	present_in	SH1675920.08FU	k__Fungi;p__Basidiomycota;c__Agaricomycetes;o__Sebacinales;f__Sebacinaceae;g__Helvellosebacina;s__Helvellosebacina_sp	UCL8_002190
22_879	Helvellosebacina__UDB008822__sample			present_in	SH1675903.08FU	k__Fungi;p__Basidiomycota;c__Agaricomycetes;o__Sebacinales;f__Sebacinaceae;g__Helvellosebacina;s__Helvellosebacina_sp	UCL8_002190
22_501	MK234213		USA	present_in	SH1731025.08FU	k__Fungi;p__Basidiomycota;c__Agaricomycetes;o__Sebacinales;f__Sebacinaceae;g__Sebacina;s__Sebacina_candida	UCL8_007582
22_675	KM576597	Quercus_petraea	Austria	present_in	SH1731053.08FU	k__Fungi;p__Basidiomycota;c__Agaricomycetes;o__Sebacinales;f__Sebacinaceae;g__Sebacina;s__Sebacina_dimitica	UCL8_007582
22_660	Sebacina_dimitica__UDB016422__TU115569		Estonia	present_in	SH1731053.08FU	k__Fungi;p__Basidiomycota;c__Agaricomycetes;o__Sebacinales;f__Sebacinaceae;g__Sebacina;s__Sebacina_dimitica	UCL8_007582
22_666	Sebacina__UDB026477__Tilia_cordata_sample	Tilia_cordata	Estonia	present_in	SH1731053.08FU	k__Fungi;p__Basidiomycota;c__Agaricomycetes;o__Sebacinales;f__Sebacinaceae;g__Sebacina;s__Sebacina_dimitica	UCL8_007582
22_1072	KF061274		Estonia	duplicate_of_JQ420940|Picea_abies|Germany	SH1731041.08FU	k__Fungi;p__Basidiomycota;c__Agaricomycetes;o__Sebacinales;f__Sebacinaceae;g__Sebacina;s__Sebacina_dimitica	UCL8_007582
22_1068	JQ420940	Picea_abies	Germany	present_in	SH1731041.08FU	k__Fungi;p__Basidiomycota;c__Agaricomycetes;o__Sebacinales;f__Sebacinaceae;g__Sebacina;s__Sebacina_dimitica	UCL8_007582
22_1069	KC986265	Bistorta_vivipara	Germany	duplicate_of_JQ420940|Picea_abies|Germany	SH1731041.08FU	k__Fungi;p__Basidiomycota;c__Agaricomycetes;o__Sebacinales;f__Sebacinaceae;g__Sebacina;s__Sebacina_dimitica	UCL8_007582
22_1070	KF061269		Germany	duplicate_of_JQ420940|Picea_abies|Germany	SH1731041.08FU	k__Fungi;p__Basidiomycota;c__Agaricomycetes;o__Sebacinales;f__Sebacinaceae;g__Sebacina;s__Sebacina_dimitica	UCL8_007582
22_1071	KF061270		Germany	duplicate_of_JQ420940|Picea_abies|Germany	SH1731041.08FU	k__Fungi;p__Basidiomycota;c__Agaricomycetes;o__Sebacinales;f__Sebacinaceae;g__Sebacina;s__Sebacina_dimitica	UCL8_007582
22_665	Sebacina__UDB005593__sample	Fagaceae	Iran,_Islamic_Republic_of	present_in	SH1731053.08FU	k__Fungi;p__Basidiomycota;c__Agaricomycetes;o__Sebacinales;f__Sebacinaceae;g__Sebacina;s__Sebacina_dimitica	UCL8_007582
22_1158	LC175648	Abies_sachalinensis	Japan	present_in	SH1731041.08FU	k__Fungi;p__Basidiomycota;c__Agaricomycetes;o__Sebacinales;f__Sebacinaceae;g__Sebacina;s__Sebacina_dimitica	UCL8_007582
22_1066	AB854711		Unspecified	present_in	SH1731041.08FU	k__Fungi;p__Basidiomycota;c__Agaricomycetes;o__Sebacinales;f__Sebacinaceae;g__Sebacina;s__Sebacina_dimitica	UCL8_007582
22_677	Sebacina_dimitica__UDB0754284__TU114827			present_in	SH1731053.08FU	k__Fungi;p__Basidiomycota;c__Agaricomycetes;o__Sebacinales;f__Sebacinaceae;g__Sebacina;s__Sebacina_dimitica	UCL8_007582
22_491	KF000423		Austria	duplicate_of_FJ210754||Italy	SH1731009.08FU	k__Fungi;p__Basidiomycota;c__Agaricomycetes;o__Sebacinales;f__Sebacinaceae;g__Sebacina;s__Sebacina_epigaea	UCL8_007582
22_107	Sebacina__UDB026782__Neottia_nidus-avis_sample	Neottia_nidus-avis	Estonia	present_in	SH1731071.08FU	k__Fungi;p__Basidiomycota;c__Agaricomycetes;o__Sebacinales;f__Sebacinaceae;g__Sebacina;s__Sebacina_epigaea	UCL8_007582
22_461	Sebacina__KM247687		France	present_in	SH1731009.08FU	k__Fungi;p__Basidiomycota;c__Agaricomycetes;o__Sebacinales;f__Sebacinaceae;g__Sebacina;s__Sebacina_epigaea	UCL8_007582
22_874	JQ890305	Alnus	France	present_in	SH1672840.08FU	k__Fungi;p__Basidiomycota;c__Agaricomycetes;o__Sebacinales;f__Sebacinaceae;g__Sebacina;s__Sebacina_epigaea	UCL8_001587
22_875	Sebacina__JX989954	Alnus_sp.	France	duplicate_of_JQ890305|Alnus|France	SH1672840.08FU	k__Fungi;p__Basidiomycota;c__Agaricomycetes;o__Sebacinales;f__Sebacinaceae;g__Sebacina;s__Sebacina_epigaea	UCL8_001587
22_485	HQ154317	Lamium	Germany	duplicate_of_FJ210754||Italy	SH1731009.08FU	k__Fungi;p__Basidiomycota;c__Agaricomycetes;o__Sebacinales;f__Sebacinaceae;g__Sebacina;s__Sebacina_epigaea	UCL8_007582
22_486	HQ154318	Lamium	Germany	duplicate_of_FJ210754||Italy	SH1731009.08FU	k__Fungi;p__Basidiomycota;c__Agaricomycetes;o__Sebacinales;f__Sebacinaceae;g__Sebacina;s__Sebacina_epigaea	UCL8_007582
22_487	HQ154333	Viola_reichenbachiana	Germany	duplicate_of_FJ210754||Italy	SH1731009.08FU	k__Fungi;p__Basidiomycota;c__Agaricomycetes;o__Sebacinales;f__Sebacinaceae;g__Sebacina;s__Sebacina_epigaea	UCL8_007582
22_488	HQ154414	Viola_reichenbachiana	Germany	duplicate_of_FJ210754||Italy	SH1731009.08FU	k__Fungi;p__Basidiomycota;c__Agaricomycetes;o__Sebacinales;f__Sebacinaceae;g__Sebacina;s__Sebacina_epigaea	UCL8_007582
22_489	JQ665481		Germany	duplicate_of_FJ210754||Italy	SH1731009.08FU	k__Fungi;p__Basidiomycota;c__Agaricomycetes;o__Sebacinales;f__Sebacinaceae;g__Sebacina;s__Sebacina_epigaea	UCL8_007582
22_483	HQ154219	Dryas_octopetala	Germany	present_in	SH1731009.08FU	k__Fungi;p__Basidiomycota;c__Agaricomycetes;o__Sebacinales;f__Sebacinaceae;g__Sebacina;s__Sebacina_epigaea	UCL8_007582
22_490	KC986241	Bistorta_vivipara	Germany	present_in	SH1731009.08FU	k__Fungi;p__Basidiomycota;c__Agaricomycetes;o__Sebacinales;f__Sebacinaceae;g__Sebacina;s__Sebacina_epigaea	UCL8_007582
22_484	HQ154275	Salix_waldsteiniana	Germany	present_in	SH1731009.08FU	k__Fungi;p__Basidiomycota;c__Agaricomycetes;o__Sebacinales;f__Sebacinaceae;g__Sebacina;s__Sebacina_epigaea	UCL8_007582
22_493	KC986243	Bistorta_vivipara	Germany	present_in	SH1731009.08FU	k__Fungi;p__Basidiomycota;c__Agaricomycetes;o__Sebacinales;f__Sebacinaceae;g__Sebacina;s__Sebacina_epigaea	UCL8_007582
22_871	HQ154231	Dryas_octopetala	Germany	present_in	SH1672840.08FU	k__Fungi;p__Basidiomycota;c__Agaricomycetes;o__Sebacinales;f__Sebacinaceae;g__Sebacina;s__Sebacina_epigaea	UCL8_001587
22_872	JQ665484		Germany	present_in	SH1672840.08FU	k__Fungi;p__Basidiomycota;c__Agaricomycetes;o__Sebacinales;f__Sebacinaceae;g__Sebacina;s__Sebacina_epigaea	UCL8_001587
22_873	KF000561	Bistorta_vivipara	Germany	duplicate_of_JQ665484||Germany	SH1672840.08FU	k__Fungi;p__Basidiomycota;c__Agaricomycetes;o__Sebacinales;f__Sebacinaceae;g__Sebacina;s__Sebacina_epigaea	UCL8_001587
22_1117	KF000495	Bistorta_vivipara	Germany	present_in	SH1731144.08FU	k__Fungi;p__Basidiomycota;c__Agaricomycetes;o__Sebacinales;f__Sebacinaceae;g__Sebacina;s__Sebacina_epigaea	UCL8_007582
22_1116	JQ665492		Germany	present_in	SH1731144.08FU	k__Fungi;p__Basidiomycota;c__Agaricomycetes;o__Sebacinales;f__Sebacinaceae;g__Sebacina;s__Sebacina_epigaea	UCL8_007582
22_467	JX625310		Italy	present_in	SH1731009.08FU	k__Fungi;p__Basidiomycota;c__Agaricomycetes;o__Sebacinales;f__Sebacinaceae;g__Sebacina;s__Sebacina_epigaea	UCL8_007582
22_480	FJ210754		Italy	present_in	SH1731009.08FU	k__Fungi;p__Basidiomycota;c__Agaricomycetes;o__Sebacinales;f__Sebacinaceae;g__Sebacina;s__Sebacina_epigaea	UCL8_007582
22_481	FJ809768	Serapias_vomeracea	Italy	present_in	SH1731009.08FU	k__Fungi;p__Basidiomycota;c__Agaricomycetes;o__Sebacinales;f__Sebacinaceae;g__Sebacina;s__Sebacina_epigaea	UCL8_007582
22_482	FJ809769	Serapias_vomeracea	Italy	duplicate_of_FJ809768|Serapias_vomeracea|Italy	SH1731009.08FU	k__Fungi;p__Basidiomycota;c__Agaricomycetes;o__Sebacinales;f__Sebacinaceae;g__Sebacina;s__Sebacina_epigaea	UCL8_007582
22_870	MF352773	Pinus_sylvestris	United_Kingdom	present_in	SH1672840.08FU	k__Fungi;p__Basidiomycota;c__Agaricomycetes;o__Sebacinales;f__Sebacinaceae;g__Sebacina;s__Sebacina_epigaea	UCL8_001587
22_459	HQ667897	Hexalectris_spicata	United_States	present_in	SH1672824.08FU	k__Fungi;p__Basidiomycota;c__Agaricomycetes;o__Sebacinales;f__Sebacinaceae;g__Sebacina;s__Sebacina_epigaea	UCL8_001587
22_815	JQ393118		United_States	present_in	SH1672824.08FU	k__Fungi;p__Basidiomycota;c__Agaricomycetes;o__Sebacinales;f__Sebacinaceae;g__Sebacina;s__Sebacina_epigaea	UCL8_001587
22_720	LC013783	Pinus_tabuliformis	China	present_in	SH1731007.08FU	k__Fungi;p__Basidiomycota;c__Agaricomycetes;o__Sebacinales;f__Sebacinaceae;g__Sebacina;s__Sebacina_flagelliformis	UCL8_007582
22_721	JQ318646	Quercus_liaotungensis	China	present_in	SH1731007.08FU	k__Fungi;p__Basidiomycota;c__Agaricomycetes;o__Sebacinales;f__Sebacinaceae;g__Sebacina;s__Sebacina_flagelliformis	UCL8_007582
22_729	HM105523	Quercus	China	present_in	SH1731007.08FU	k__Fungi;p__Basidiomycota;c__Agaricomycetes;o__Sebacinales;f__Sebacinaceae;g__Sebacina;s__Sebacina_flagelliformis	UCL8_007582
22_755	MF405785	Quercus_variabilis	China	present_in	SH1731007.08FU	k__Fungi;p__Basidiomycota;c__Agaricomycetes;o__Sebacinales;f__Sebacinaceae;g__Sebacina;s__Sebacina_flagelliformis	UCL8_007582
22_735	JF748104	Quercus_wutaishanica	China	present_in	SH1731007.08FU	k__Fungi;p__Basidiomycota;c__Agaricomycetes;o__Sebacinales;f__Sebacinaceae;g__Sebacina;s__Sebacina_flagelliformis	UCL8_007582
22_759	KX444318	Quercus_liaotungensis	China	present_in	SH1731007.08FU	k__Fungi;p__Basidiomycota;c__Agaricomycetes;o__Sebacinales;f__Sebacinaceae;g__Sebacina;s__Sebacina_flagelliformis	UCL8_007582
22_760	KY684546	Quercus_sp.	China	duplicate_of_KX444318|Quercus_liaotungensis|China	SH1731007.08FU	k__Fungi;p__Basidiomycota;c__Agaricomycetes;o__Sebacinales;f__Sebacinaceae;g__Sebacina;s__Sebacina_flagelliformis	UCL8_007582
22_731	AF440649	Neottia_nidus-avis	France	present_in	SH1731007.08FU	k__Fungi;p__Basidiomycota;c__Agaricomycetes;o__Sebacinales;f__Sebacinaceae;g__Sebacina;s__Sebacina_flagelliformis	UCL8_007582
22_732	AF440654	Neottia_nidus-avis	France	present_in	SH1731007.08FU	k__Fungi;p__Basidiomycota;c__Agaricomycetes;o__Sebacinales;f__Sebacinaceae;g__Sebacina;s__Sebacina_flagelliformis	UCL8_007582
22_754	KF871205	Ophrys_aymoninii	France	duplicate_of_AF440654|Neottia_nidus-avis|France	SH1731007.08FU	k__Fungi;p__Basidiomycota;c__Agaricomycetes;o__Sebacinales;f__Sebacinaceae;g__Sebacina;s__Sebacina_flagelliformis	UCL8_007582
22_733	AF440662	Neottia_nidus-avis	France	present_in	SH1731007.08FU	k__Fungi;p__Basidiomycota;c__Agaricomycetes;o__Sebacinales;f__Sebacinaceae;g__Sebacina;s__Sebacina_flagelliformis	UCL8_007582
22_725	KF000578	Bistorta_vivipara	Germany	present_in	SH1731007.08FU	k__Fungi;p__Basidiomycota;c__Agaricomycetes;o__Sebacinales;f__Sebacinaceae;g__Sebacina;s__Sebacina_flagelliformis	UCL8_007582
22_726	KF000580	Bistorta_vivipara	Germany	duplicate_of_KF000578|Bistorta_vivipara|Germany	SH1731007.08FU	k__Fungi;p__Basidiomycota;c__Agaricomycetes;o__Sebacinales;f__Sebacinaceae;g__Sebacina;s__Sebacina_flagelliformis	UCL8_007582
22_728	KF000581	Bistorta_vivipara	Germany	present_in	SH1731007.08FU	k__Fungi;p__Basidiomycota;c__Agaricomycetes;o__Sebacinales;f__Sebacinaceae;g__Sebacina;s__Sebacina_flagelliformis	UCL8_007582
22_744	JQ665501		Germany	duplicate_of_AF440649|Neottia_nidus-avis|France	SH1731007.08FU	k__Fungi;p__Basidiomycota;c__Agaricomycetes;o__Sebacinales;f__Sebacinaceae;g__Sebacina;s__Sebacina_flagelliformis	UCL8_007582
22_736	JQ665493		Germany	duplicate_of_AF440654|Neottia_nidus-avis|France	SH1731007.08FU	k__Fungi;p__Basidiomycota;c__Agaricomycetes;o__Sebacinales;f__Sebacinaceae;g__Sebacina;s__Sebacina_flagelliformis	UCL8_007582
22_737	JQ665494		Germany	duplicate_of_AF440654|Neottia_nidus-avis|France	SH1731007.08FU	k__Fungi;p__Basidiomycota;c__Agaricomycetes;o__Sebacinales;f__Sebacinaceae;g__Sebacina;s__Sebacina_flagelliformis	UCL8_007582
22_738	JQ665495		Germany	duplicate_of_AF440654|Neottia_nidus-avis|France	SH1731007.08FU	k__Fungi;p__Basidiomycota;c__Agaricomycetes;o__Sebacinales;f__Sebacinaceae;g__Sebacina;s__Sebacina_flagelliformis	UCL8_007582
22_739	JQ665496		Germany	duplicate_of_AF440654|Neottia_nidus-avis|France	SH1731007.08FU	k__Fungi;p__Basidiomycota;c__Agaricomycetes;o__Sebacinales;f__Sebacinaceae;g__Sebacina;s__Sebacina_flagelliformis	UCL8_007582
22_740	JQ665497		Germany	duplicate_of_AF440654|Neottia_nidus-avis|France	SH1731007.08FU	k__Fungi;p__Basidiomycota;c__Agaricomycetes;o__Sebacinales;f__Sebacinaceae;g__Sebacina;s__Sebacina_flagelliformis	UCL8_007582
22_741	JQ665498		Germany	duplicate_of_AF440654|Neottia_nidus-avis|France	SH1731007.08FU	k__Fungi;p__Basidiomycota;c__Agaricomycetes;o__Sebacinales;f__Sebacinaceae;g__Sebacina;s__Sebacina_flagelliformis	UCL8_007582
22_742	JQ665499		Germany	duplicate_of_AF440654|Neottia_nidus-avis|France	SH1731007.08FU	k__Fungi;p__Basidiomycota;c__Agaricomycetes;o__Sebacinales;f__Sebacinaceae;g__Sebacina;s__Sebacina_flagelliformis	UCL8_007582
22_743	JQ665500		Germany	duplicate_of_AF440654|Neottia_nidus-avis|France	SH1731007.08FU	k__Fungi;p__Basidiomycota;c__Agaricomycetes;o__Sebacinales;f__Sebacinaceae;g__Sebacina;s__Sebacina_flagelliformis	UCL8_007582
22_746	KC986259	Bistorta_vivipara	Germany	duplicate_of_AF440654|Neottia_nidus-avis|France	SH1731007.08FU	k__Fungi;p__Basidiomycota;c__Agaricomycetes;o__Sebacinales;f__Sebacinaceae;g__Sebacina;s__Sebacina_flagelliformis	UCL8_007582
22_747	KC986260	Bistorta_vivipara	Germany	duplicate_of_AF440654|Neottia_nidus-avis|France	SH1731007.08FU	k__Fungi;p__Basidiomycota;c__Agaricomycetes;o__Sebacinales;f__Sebacinaceae;g__Sebacina;s__Sebacina_flagelliformis	UCL8_007582
22_748	KC986261	Bistorta_vivipara	Germany	duplicate_of_AF440654|Neottia_nidus-avis|France	SH1731007.08FU	k__Fungi;p__Basidiomycota;c__Agaricomycetes;o__Sebacinales;f__Sebacinaceae;g__Sebacina;s__Sebacina_flagelliformis	UCL8_007582
22_749	KC986262	Bistorta_vivipara	Germany	duplicate_of_AF440654|Neottia_nidus-avis|France	SH1731007.08FU	k__Fungi;p__Basidiomycota;c__Agaricomycetes;o__Sebacinales;f__Sebacinaceae;g__Sebacina;s__Sebacina_flagelliformis	UCL8_007582
22_734	HQ154312	Acer_pseudoplatanus	Germany	present_in	SH1731007.08FU	k__Fungi;p__Basidiomycota;c__Agaricomycetes;o__Sebacinales;f__Sebacinaceae;g__Sebacina;s__Sebacina_flagelliformis	UCL8_007582
22_745	JQ665502		Germany	duplicate_of_HQ154312|Acer_pseudoplatanus|Germany	SH1731007.08FU	k__Fungi;p__Basidiomycota;c__Agaricomycetes;o__Sebacinales;f__Sebacinaceae;g__Sebacina;s__Sebacina_flagelliformis	UCL8_007582
22_750	KF000463		Germany	duplicate_of_HQ154312|Acer_pseudoplatanus|Germany	SH1731007.08FU	k__Fungi;p__Basidiomycota;c__Agaricomycetes;o__Sebacinales;f__Sebacinaceae;g__Sebacina;s__Sebacina_flagelliformis	UCL8_007582
22_751	KF000464		Germany	duplicate_of_HQ154312|Acer_pseudoplatanus|Germany	SH1731007.08FU	k__Fungi;p__Basidiomycota;c__Agaricomycetes;o__Sebacinales;f__Sebacinaceae;g__Sebacina;s__Sebacina_flagelliformis	UCL8_007582
22_752	KF000576	Bistorta_vivipara	Germany	duplicate_of_HQ154312|Acer_pseudoplatanus|Germany	SH1731007.08FU	k__Fungi;p__Basidiomycota;c__Agaricomycetes;o__Sebacinales;f__Sebacinaceae;g__Sebacina;s__Sebacina_flagelliformis	UCL8_007582
22_753	KF000577	Bistorta_vivipara	Germany	duplicate_of_HQ154312|Acer_pseudoplatanus|Germany	SH1731007.08FU	k__Fungi;p__Basidiomycota;c__Agaricomycetes;o__Sebacinales;f__Sebacinaceae;g__Sebacina;s__Sebacina_flagelliformis	UCL8_007582
22_757	NR_138387		Germany	duplicate_of_HQ154312|Acer_pseudoplatanus|Germany	SH1731007.08FU	k__Fungi;p__Basidiomycota;c__Agaricomycetes;o__Sebacinales;f__Sebacinaceae;g__Sebacina;s__Sebacina_flagelliformis	UCL8_007582
22_758	KF000579	Bistorta_vivipara	Germany	present_in	SH1731007.08FU	k__Fungi;p__Basidiomycota;c__Agaricomycetes;o__Sebacinales;f__Sebacinaceae;g__Sebacina;s__Sebacina_flagelliformis	UCL8_007582
22_727	AY940652	Fagales	Italy	present_in	SH1731007.08FU	k__Fungi;p__Basidiomycota;c__Agaricomycetes;o__Sebacinales;f__Sebacinaceae;g__Sebacina;s__Sebacina_flagelliformis	UCL8_007582
22_723	Sebacina__UDB026626__Cistus_monspeliensis_sample	Cistus_monspeliensis	Morocco	present_in	SH1731007.08FU	k__Fungi;p__Basidiomycota;c__Agaricomycetes;o__Sebacinales;f__Sebacinaceae;g__Sebacina;s__Sebacina_flagelliformis	UCL8_007582
22_724	Sebacina__UDB034308__Achroot			present_in	SH1731007.08FU	k__Fungi;p__Basidiomycota;c__Agaricomycetes;o__Sebacinales;f__Sebacinaceae;g__Sebacina;s__Sebacina_flagelliformis	UCL8_007582
22_756	MN947376			present_in	SH1731007.08FU	k__Fungi;p__Basidiomycota;c__Agaricomycetes;o__Sebacinales;f__Sebacinaceae;g__Sebacina;s__Sebacina_flagelliformis	UCL8_007582
22_719	KF773776	Pakaraimaea_dipterocarpacea	Venezuela_(Bolivarian_Republic_of)	present_in	SH1744104.08FU	k__Fungi;p__Basidiomycota;c__Agaricomycetes;o__Sebacinales;f__Sebacinaceae;g__Sebacina;s__Sebacina_guayanensis	UCL8_008621
22_1051	KP012984		Australia	present_in	SH1731135.08FU	k__Fungi;p__Basidiomycota;c__Agaricomycetes;o__Sebacinales;f__Sebacinaceae;g__Sebacina;s__Sebacina_incrustans	UCL8_007582
22_949	KF000420		Austria	present_in	SH1800251.08FU	k__Fungi;p__Basidiomycota;c__Agaricomycetes;o__Sebacinales;f__Sebacinaceae;g__Sebacina;s__Sebacina_incrustans	UCL8_010859
22_981	KF000419		Austria	duplicate_of_AF490395||France	SH1800251.08FU	k__Fungi;p__Basidiomycota;c__Agaricomycetes;o__Sebacinales;f__Sebacinaceae;g__Sebacina;s__Sebacina_incrustans	UCL8_010859
22_982	KF000422		Austria	duplicate_of_AF490395||France	SH1800251.08FU	k__Fungi;p__Basidiomycota;c__Agaricomycetes;o__Sebacinales;f__Sebacinaceae;g__Sebacina;s__Sebacina_incrustans	UCL8_010859
22_983	KF000426		Austria	duplicate_of_AF490395||France	SH1800251.08FU	k__Fungi;p__Basidiomycota;c__Agaricomycetes;o__Sebacinales;f__Sebacinaceae;g__Sebacina;s__Sebacina_incrustans	UCL8_010859
22_621	HM105512	Quercus	China	present_in	SH1731030.08FU	k__Fungi;p__Basidiomycota;c__Agaricomycetes;o__Sebacinales;f__Sebacinaceae;g__Sebacina;s__Sebacina_incrustans	UCL8_007582
22_636	MF405786	Quercus_variabilis	China	present_in	SH1731030.08FU	k__Fungi;p__Basidiomycota;c__Agaricomycetes;o__Sebacinales;f__Sebacinaceae;g__Sebacina;s__Sebacina_incrustans	UCL8_007582
22_616	Sebacina_incrustans__UDB014121__TU110850		Estonia	present_in	SH1731028.08FU	k__Fungi;p__Basidiomycota;c__Agaricomycetes;o__Sebacinales;f__Sebacinaceae;g__Sebacina;s__Sebacina_incrustans	UCL8_007582
22_618	Sebacina__UDB025082__TU116268		Estonia	present_in	SH1731028.08FU	k__Fungi;p__Basidiomycota;c__Agaricomycetes;o__Sebacinales;f__Sebacinaceae;g__Sebacina;s__Sebacina_incrustans	UCL8_007582
22_634	KU924630	Alnus_cordata	France	duplicate_of_JQ665547||Germany	SH1731030.08FU	k__Fungi;p__Basidiomycota;c__Agaricomycetes;o__Sebacinales;f__Sebacinaceae;g__Sebacina;s__Sebacina_incrustans	UCL8_007582
22_635	KU924631	Alnus_cordata	France	duplicate_of_JQ665547||Germany	SH1731030.08FU	k__Fungi;p__Basidiomycota;c__Agaricomycetes;o__Sebacinales;f__Sebacinaceae;g__Sebacina;s__Sebacina_incrustans	UCL8_007582
22_965	AF490395		France	present_in	SH1800251.08FU	k__Fungi;p__Basidiomycota;c__Agaricomycetes;o__Sebacinales;f__Sebacinaceae;g__Sebacina;s__Sebacina_incrustans	UCL8_010859
22_620	KF000440		Germany	present_in	SH1731145.08FU	k__Fungi;p__Basidiomycota;c__Agaricomycetes;o__Sebacinales;f__Sebacinaceae;g__Sebacina;s__Sebacina_incrustans	UCL8_007582
22_631	KC986253	Bistorta_vivipara	Germany	present_in	SH1731030.08FU	k__Fungi;p__Basidiomycota;c__Agaricomycetes;o__Sebacinales;f__Sebacinaceae;g__Sebacina;s__Sebacina_incrustans	UCL8_007582
22_632	KC986254	Bistorta_vivipara	Germany	duplicate_of_KC986253|Bistorta_vivipara|Germany	SH1731030.08FU	k__Fungi;p__Basidiomycota;c__Agaricomycetes;o__Sebacinales;f__Sebacinaceae;g__Sebacina;s__Sebacina_incrustans	UCL8_007582
22_633	KC986258	Bistorta_vivipara	Germany	duplicate_of_KC986253|Bistorta_vivipara|Germany	SH1731030.08FU	k__Fungi;p__Basidiomycota;c__Agaricomycetes;o__Sebacinales;f__Sebacinaceae;g__Sebacina;s__Sebacina_incrustans	UCL8_007582
22_622	JQ665547		Germany	present_in	SH1731030.08FU	k__Fungi;p__Basidiomycota;c__Agaricomycetes;o__Sebacinales;f__Sebacinaceae;g__Sebacina;s__Sebacina_incrustans	UCL8_007582
22_623	JQ665548		Germany	duplicate_of_JQ665547||Germany	SH1731030.08FU	k__Fungi;p__Basidiomycota;c__Agaricomycetes;o__Sebacinales;f__Sebacinaceae;g__Sebacina;s__Sebacina_incrustans	UCL8_007582
22_624	JQ665549		Germany	duplicate_of_JQ665547||Germany	SH1731030.08FU	k__Fungi;p__Basidiomycota;c__Agaricomycetes;o__Sebacinales;f__Sebacinaceae;g__Sebacina;s__Sebacina_incrustans	UCL8_007582
22_625	JQ665550		Germany	duplicate_of_JQ665547||Germany	SH1731030.08FU	k__Fungi;p__Basidiomycota;c__Agaricomycetes;o__Sebacinales;f__Sebacinaceae;g__Sebacina;s__Sebacina_incrustans	UCL8_007582
22_626	JQ665551		Germany	duplicate_of_JQ665547||Germany	SH1731030.08FU	k__Fungi;p__Basidiomycota;c__Agaricomycetes;o__Sebacinales;f__Sebacinaceae;g__Sebacina;s__Sebacina_incrustans	UCL8_007582
22_627	JQ665552		Germany	duplicate_of_JQ665547||Germany	SH1731030.08FU	k__Fungi;p__Basidiomycota;c__Agaricomycetes;o__Sebacinales;f__Sebacinaceae;g__Sebacina;s__Sebacina_incrustans	UCL8_007582
22_628	JQ665553		Germany	duplicate_of_JQ665547||Germany	SH1731030.08FU	k__Fungi;p__Basidiomycota;c__Agaricomycetes;o__Sebacinales;f__Sebacinaceae;g__Sebacina;s__Sebacina_incrustans	UCL8_007582
22_629	JQ665554		Germany	duplicate_of_JQ665547||Germany	SH1731030.08FU	k__Fungi;p__Basidiomycota;c__Agaricomycetes;o__Sebacinales;f__Sebacinaceae;g__Sebacina;s__Sebacina_incrustans	UCL8_007582
22_630	JQ665555		Germany	duplicate_of_JQ665547||Germany	SH1731030.08FU	k__Fungi;p__Basidiomycota;c__Agaricomycetes;o__Sebacinales;f__Sebacinaceae;g__Sebacina;s__Sebacina_incrustans	UCL8_007582
22_960	KF000574	Bistorta_vivipara	Germany	present_in	SH1800251.08FU	k__Fungi;p__Basidiomycota;c__Agaricomycetes;o__Sebacinales;f__Sebacinaceae;g__Sebacina;s__Sebacina_incrustans	UCL8_010859
22_985	KF000575	Bistorta_vivipara	Germany	present_in	SH1800251.08FU	k__Fungi;p__Basidiomycota;c__Agaricomycetes;o__Sebacinales;f__Sebacinaceae;g__Sebacina;s__Sebacina_incrustans	UCL8_010859
22_966	JQ665517		Germany	duplicate_of_AF490395||France	SH1800251.08FU	k__Fungi;p__Basidiomycota;c__Agaricomycetes;o__Sebacinales;f__Sebacinaceae;g__Sebacina;s__Sebacina_incrustans	UCL8_010859
22_967	JQ665518		Germany	duplicate_of_AF490395||France	SH1800251.08FU	k__Fungi;p__Basidiomycota;c__Agaricomycetes;o__Sebacinales;f__Sebacinaceae;g__Sebacina;s__Sebacina_incrustans	UCL8_010859
22_968	JQ665519		Germany	duplicate_of_AF490395||France	SH1800251.08FU	k__Fungi;p__Basidiomycota;c__Agaricomycetes;o__Sebacinales;f__Sebacinaceae;g__Sebacina;s__Sebacina_incrustans	UCL8_010859
22_969	JQ665520		Germany	duplicate_of_AF490395||France	SH1800251.08FU	k__Fungi;p__Basidiomycota;c__Agaricomycetes;o__Sebacinales;f__Sebacinaceae;g__Sebacina;s__Sebacina_incrustans	UCL8_010859
22_970	JQ665521		Germany	duplicate_of_AF490395||France	SH1800251.08FU	k__Fungi;p__Basidiomycota;c__Agaricomycetes;o__Sebacinales;f__Sebacinaceae;g__Sebacina;s__Sebacina_incrustans	UCL8_010859
22_971	JQ665522		Germany	duplicate_of_AF490395||France	SH1800251.08FU	k__Fungi;p__Basidiomycota;c__Agaricomycetes;o__Sebacinales;f__Sebacinaceae;g__Sebacina;s__Sebacina_incrustans	UCL8_010859
22_972	JQ665523		Germany	duplicate_of_AF490395||France	SH1800251.08FU	k__Fungi;p__Basidiomycota;c__Agaricomycetes;o__Sebacinales;f__Sebacinaceae;g__Sebacina;s__Sebacina_incrustans	UCL8_010859
22_973	JQ665524		Germany	duplicate_of_AF490395||France	SH1800251.08FU	k__Fungi;p__Basidiomycota;c__Agaricomycetes;o__Sebacinales;f__Sebacinaceae;g__Sebacina;s__Sebacina_incrustans	UCL8_010859
22_974	JQ665525		Germany	duplicate_of_AF490395||France	SH1800251.08FU	k__Fungi;p__Basidiomycota;c__Agaricomycetes;o__Sebacinales;f__Sebacinaceae;g__Sebacina;s__Sebacina_incrustans	UCL8_010859
22_975	JQ665526		Germany	duplicate_of_AF490395||France	SH1800251.08FU	k__Fungi;p__Basidiomycota;c__Agaricomycetes;o__Sebacinales;f__Sebacinaceae;g__Sebacina;s__Sebacina_incrustans	UCL8_010859
22_976	JQ665527		Germany	duplicate_of_AF490395||France	SH1800251.08FU	k__Fungi;p__Basidiomycota;c__Agaricomycetes;o__Sebacinales;f__Sebacinaceae;g__Sebacina;s__Sebacina_incrustans	UCL8_010859
22_977	JQ665528		Germany	duplicate_of_AF490395||France	SH1800251.08FU	k__Fungi;p__Basidiomycota;c__Agaricomycetes;o__Sebacinales;f__Sebacinaceae;g__Sebacina;s__Sebacina_incrustans	UCL8_010859
22_978	JQ665529		Germany	duplicate_of_AF490395||France	SH1800251.08FU	k__Fungi;p__Basidiomycota;c__Agaricomycetes;o__Sebacinales;f__Sebacinaceae;g__Sebacina;s__Sebacina_incrustans	UCL8_010859
22_979	JQ665530		Germany	duplicate_of_AF490395||France	SH1800251.08FU	k__Fungi;p__Basidiomycota;c__Agaricomycetes;o__Sebacinales;f__Sebacinaceae;g__Sebacina;s__Sebacina_incrustans	UCL8_010859
22_980	JQ665531		Germany	duplicate_of_AF490395||France	SH1800251.08FU	k__Fungi;p__Basidiomycota;c__Agaricomycetes;o__Sebacinales;f__Sebacinaceae;g__Sebacina;s__Sebacina_incrustans	UCL8_010859
22_984	KF000446		Germany	duplicate_of_AF490395||France	SH1800251.08FU	k__Fungi;p__Basidiomycota;c__Agaricomycetes;o__Sebacinales;f__Sebacinaceae;g__Sebacina;s__Sebacina_incrustans	UCL8_010859
22_645	Sebacina__KT122775	Cephalanthera_longifolia	Italy	present_in	SH1800248.08FU	k__Fungi;p__Basidiomycota;c__Agaricomycetes;o__Sebacinales;f__Sebacinaceae;g__Sebacina;s__Sebacina_incrustans	UCL8_010859
22_619	HF674612	Fagus_sylvatica	Slovenia	present_in	SH1731028.08FU	k__Fungi;p__Basidiomycota;c__Agaricomycetes;o__Sebacinales;f__Sebacinaceae;g__Sebacina;s__Sebacina_incrustans	UCL8_007582
22_637	HF674618	Fagus_sylvatica	Slovenia	present_in	SH1731028.08FU	k__Fungi;p__Basidiomycota;c__Agaricomycetes;o__Sebacinales;f__Sebacinaceae;g__Sebacina;s__Sebacina_incrustans	UCL8_007582
22_640	MN265711	Abies_alba	Slovenia	present_in	SH1731028.08FU	k__Fungi;p__Basidiomycota;c__Agaricomycetes;o__Sebacinales;f__Sebacinaceae;g__Sebacina;s__Sebacina_incrustans	UCL8_007582
22_639	Sebacina__KM374353		Unspecified	present_in	SH1731145.08FU	k__Fungi;p__Basidiomycota;c__Agaricomycetes;o__Sebacinales;f__Sebacinaceae;g__Sebacina;s__Sebacina_incrustans	UCL8_007582
22_638	Sebacina__KM374420		Unspecified	present_in	SH1731028.08FU	k__Fungi;p__Basidiomycota;c__Agaricomycetes;o__Sebacinales;f__Sebacinaceae;g__Sebacina;s__Sebacina_incrustans	UCL8_007582
22_955	KY446843	Bistorta_vivipara	Unspecified	present_in	SH1800251.08FU	k__Fungi;p__Basidiomycota;c__Agaricomycetes;o__Sebacinales;f__Sebacinaceae;g__Sebacina;s__Sebacina_incrustans	UCL8_010859
22_957	KY446842	Bistorta_vivipara	Unspecified	present_in	SH1800251.08FU	k__Fungi;p__Basidiomycota;c__Agaricomycetes;o__Sebacinales;f__Sebacinaceae;g__Sebacina;s__Sebacina_incrustans	UCL8_010859
22_1047	KX497194	Betula_albo-sinensis_Burk	Unspecified	present_in	SH1731295.08FU	k__Fungi;p__Basidiomycota;c__Agaricomycetes;o__Sebacinales;f__Sebacinaceae;g__Sebacina;s__Sebacina_incrustans	UCL8_007582
22_614	Sebacina__UDB034314__Achroot			present_in	SH1731030.08FU	k__Fungi;p__Basidiomycota;c__Agaricomycetes;o__Sebacinales;f__Sebacinaceae;g__Sebacina;s__Sebacina_incrustans	UCL8_007582
22_699	Sebacina_incrustans__UDB014122__TU110851			present_in	SH1731112.08FU	k__Fungi;p__Basidiomycota;c__Agaricomycetes;o__Sebacinales;f__Sebacinaceae;g__Sebacina;s__Sebacina_incrustans	UCL8_007582
22_765	Sebacina__JX316391	Nothofagus_alpina	Argentina	present_in	SH1731114.08FU	k__Fungi;p__Basidiomycota;c__Agaricomycetes;o__Sebacinales;f__Sebacinaceae;g__Sebacina;s__Sebacina_sp	UCL8_007582
22_1021	EU557317	Pinaceae	Argentina	present_in	SH1682212.08FU	k__Fungi;p__Basidiomycota;c__Agaricomycetes;o__Sebacinales;f__Sebacinaceae;g__Sebacina;s__Sebacina_sp	UCL8_003407
22_508	Sebacina__DQ388870__sample	Eucalyptus	Australia	present_in	SH1731174.08FU	k__Fungi;p__Basidiomycota;c__Agaricomycetes;o__Sebacinales;f__Sebacinaceae;g__Sebacina;s__Sebacina_sp	UCL8_007582
22_865	AY093437		Australia	present_in	SH1731213.08FU	k__Fungi;p__Basidiomycota;c__Agaricomycetes;o__Sebacinales;f__Sebacinaceae;g__Sebacina;s__Sebacina_sp	UCL8_007582
22_328	EF644145	Populus_tremula	Austria	present_in	SH1731087.08FU	k__Fungi;p__Basidiomycota;c__Agaricomycetes;o__Sebacinales;f__Sebacinaceae;g__Sebacina;s__Sebacina_sp	UCL8_007582
22_476	KF000421		Austria	duplicate_of_JQ665482||Germany	SH1672829.08FU	k__Fungi;p__Basidiomycota;c__Agaricomycetes;o__Sebacinales;f__Sebacinaceae;g__Sebacina;s__Sebacina_sp	UCL8_001587
22_477	KF000431		Austria	present_in	SH1672829.08FU	k__Fungi;p__Basidiomycota;c__Agaricomycetes;o__Sebacinales;f__Sebacinaceae;g__Sebacina;s__Sebacina_sp	UCL8_001587
22_478	KF000434		Austria	duplicate_of_KF000431||Austria	SH1672829.08FU	k__Fungi;p__Basidiomycota;c__Agaricomycetes;o__Sebacinales;f__Sebacinaceae;g__Sebacina;s__Sebacina_sp	UCL8_001587
22_494	KF000427		Austria	present_in	SH1672829.08FU	k__Fungi;p__Basidiomycota;c__Agaricomycetes;o__Sebacinales;f__Sebacinaceae;g__Sebacina;s__Sebacina_sp	UCL8_001587
22_585	KF000428		Austria	present_in	SH1731004.08FU	k__Fungi;p__Basidiomycota;c__Agaricomycetes;o__Sebacinales;f__Sebacinaceae;g__Sebacina;s__Sebacina_sp	UCL8_007582
22_683	KF061271		Austria	duplicate_of_HQ154286|Gentiana_asclepiadea|Germany	SH1731015.08FU	k__Fungi;p__Basidiomycota;c__Agaricomycetes;o__Sebacinales;f__Sebacinaceae;g__Sebacina;s__Sebacina_sp	UCL8_007582
22_684	KF061272		Austria	duplicate_of_HQ154286|Gentiana_asclepiadea|Germany	SH1731015.08FU	k__Fungi;p__Basidiomycota;c__Agaricomycetes;o__Sebacinales;f__Sebacinaceae;g__Sebacina;s__Sebacina_sp	UCL8_007582
22_685	KF061273		Austria	duplicate_of_HQ154286|Gentiana_asclepiadea|Germany	SH1731015.08FU	k__Fungi;p__Basidiomycota;c__Agaricomycetes;o__Sebacinales;f__Sebacinaceae;g__Sebacina;s__Sebacina_sp	UCL8_007582
22_689	FJ197933		Austria	present_in	SH1731015.08FU	k__Fungi;p__Basidiomycota;c__Agaricomycetes;o__Sebacinales;f__Sebacinaceae;g__Sebacina;s__Sebacina_sp	UCL8_007582
22_580	Sebacina__UDB008174__sample	Isoberlinia_tomentosa	Benin	present_in	SH1682211.08FU	k__Fungi;p__Basidiomycota;c__Agaricomycetes;o__Sebacinales;f__Sebacinaceae;g__Sebacina;s__Sebacina_sp	UCL8_003407
22_999	Sebacina__UDB008204__sample	Uapaca_togoensis	Benin	present_in	SH1731239.08FU	k__Fungi;p__Basidiomycota;c__Agaricomycetes;o__Sebacinales;f__Sebacinaceae;g__Sebacina;s__Sebacina_sp	UCL8_007582
22_1030	Sebacina__UDB008168__sample	Uapaca_togoensis	Benin	present_in	SH1682225.08FU	k__Fungi;p__Basidiomycota;c__Agaricomycetes;o__Sebacinales;f__Sebacinaceae;g__Sebacina;s__Sebacina_sp	UCL8_003407
22_944	MN818547	Abies_alba	Bosnia_and_Herzegovina	present_in	SH1682214.08FU	k__Fungi;p__Basidiomycota;c__Agaricomycetes;o__Sebacinales;f__Sebacinaceae;g__Sebacina;s__Sebacina_sp	UCL8_003407
22_644	KR819135	Gilbertiodendron_dewevrei;_voucher:_AB131	Cameroon	present_in	SH1731109.08FU	k__Fungi;p__Basidiomycota;c__Agaricomycetes;o__Sebacinales;f__Sebacinaceae;g__Sebacina;s__Sebacina_sp	UCL8_007582
22_996	KR819104	Gilbertiodendron_dewevrei;_voucher:_AB100	Cameroon	present_in	SH1731242.08FU	k__Fungi;p__Basidiomycota;c__Agaricomycetes;o__Sebacinales;f__Sebacinaceae;g__Sebacina;s__Sebacina_sp	UCL8_007582
22_125	Sebacina__EU645629__sample	Pseudotsuga_menziesii	Canada	duplicate_of_JX630709|Dryas_integrifolia|United_States	SH1731018.08FU	k__Fungi;p__Basidiomycota;c__Agaricomycetes;o__Sebacinales;f__Sebacinaceae;g__Sebacina;s__Sebacina_sp	UCL8_007582
22_437	JX630561	Dryas_integrifolia	Canada	present_in	SH1731002.08FU	k__Fungi;p__Basidiomycota;c__Agaricomycetes;o__Sebacinales;f__Sebacinaceae;g__Sebacina;s__Sebacina_sp	UCL8_007582
22_438	JX630563	Dryas_integrifolia	Canada	duplicate_of_JX630561|Dryas_integrifolia|Canada	SH1731002.08FU	k__Fungi;p__Basidiomycota;c__Agaricomycetes;o__Sebacinales;f__Sebacinaceae;g__Sebacina;s__Sebacina_sp	UCL8_007582
22_586	KC840615	Picea_glauca	Canada	present_in	SH1731004.08FU	k__Fungi;p__Basidiomycota;c__Agaricomycetes;o__Sebacinales;f__Sebacinaceae;g__Sebacina;s__Sebacina_sp	UCL8_007582
22_604	JX630410	Salix_arctica	Canada	duplicate_of_JX630335|Salix_arctica|United_States	SH1731004.08FU	k__Fungi;p__Basidiomycota;c__Agaricomycetes;o__Sebacinales;f__Sebacinaceae;g__Sebacina;s__Sebacina_sp	UCL8_007582
22_697	KM402997	Pseudotsuga_menziesii	Canada	present_in	SH1731353.08FU	k__Fungi;p__Basidiomycota;c__Agaricomycetes;o__Sebacinales;f__Sebacinaceae;g__Sebacina;s__Sebacina_sp	UCL8_007582
22_800	Sebacina__MH411704	Pinus_contorta	Canada	duplicate_of_HQ667898|Hexalectris_spicata|United_States	SH1731013.08FU	k__Fungi;p__Basidiomycota;c__Agaricomycetes;o__Sebacinales;f__Sebacinaceae;g__Sebacina;s__Sebacina_sp	UCL8_007582
22_858	JX630918	Dryas_integrifolia	Canada	present_in	SH1731021.08FU	k__Fungi;p__Basidiomycota;c__Agaricomycetes;o__Sebacinales;f__Sebacinaceae;g__Sebacina;s__Sebacina_sp	UCL8_007582
22_914	JX630562	Dryas_integrifolia	Canada	duplicate_of_AF440650|Neottia_nidus-avis|France	SH1682199.08FU	k__Fungi;p__Basidiomycota;c__Agaricomycetes;o__Sebacinales;f__Sebacinaceae;g__Sebacina;s__Sebacina_sp	UCL8_003407
22_915	JX630602	Salix_arctica	Canada	duplicate_of_AF440650|Neottia_nidus-avis|France	SH1682199.08FU	k__Fungi;p__Basidiomycota;c__Agaricomycetes;o__Sebacinales;f__Sebacinaceae;g__Sebacina;s__Sebacina_sp	UCL8_003407
22_916	JX630609	Salix_arctica	Canada	duplicate_of_AF440650|Neottia_nidus-avis|France	SH1682199.08FU	k__Fungi;p__Basidiomycota;c__Agaricomycetes;o__Sebacinales;f__Sebacinaceae;g__Sebacina;s__Sebacina_sp	UCL8_003407
22_918	JX630645	Salix_arctica	Canada	duplicate_of_AF440650|Neottia_nidus-avis|France	SH1682199.08FU	k__Fungi;p__Basidiomycota;c__Agaricomycetes;o__Sebacinales;f__Sebacinaceae;g__Sebacina;s__Sebacina_sp	UCL8_003407
22_917	JX630625	Salix_arctica	Canada	present_in	SH1682199.08FU	k__Fungi;p__Basidiomycota;c__Agaricomycetes;o__Sebacinales;f__Sebacinaceae;g__Sebacina;s__Sebacina_sp	UCL8_003407
22_933	EF218815	Betula_papyrifera	Canada	present_in	SH1682199.08FU	k__Fungi;p__Basidiomycota;c__Agaricomycetes;o__Sebacinales;f__Sebacinaceae;g__Sebacina;s__Sebacina_sp	UCL8_003407
22_946	JX630611	Salix_arctica	Canada	present_in	SH1731026.08FU	k__Fungi;p__Basidiomycota;c__Agaricomycetes;o__Sebacinales;f__Sebacinaceae;g__Sebacina;s__Sebacina_sp	UCL8_007582
22_1035	KC840635	Picea_glauca	Canada	present_in	SH1682220.08FU	k__Fungi;p__Basidiomycota;c__Agaricomycetes;o__Sebacinales;f__Sebacinaceae;g__Sebacina;s__Sebacina_sp	UCL8_003407
22_1078	JN652976		Canada	present_in	SH1731150.08FU	k__Fungi;p__Basidiomycota;c__Agaricomycetes;o__Sebacinales;f__Sebacinaceae;g__Sebacina;s__Sebacina_sp	UCL8_007582
22_1145	JX630914	Salix_arctica	Canada	present_in	SH1731067.08FU	k__Fungi;p__Basidiomycota;c__Agaricomycetes;o__Sebacinales;f__Sebacinaceae;g__Sebacina;s__Sebacina_sp	UCL8_007582
22_1	KM277619	Cypripedium_plectrochilum	China	present_in	SH1849921.08FU	k__Fungi;p__Basidiomycota;c__Agaricomycetes;o__Sebacinales;f__Sebacinaceae;g__Sebacina;s__Sebacina_sp	UCL8_019172
22_126	KX444490	Quercus_liaotungensis	China	present_in	SH1731299.08FU	k__Fungi;p__Basidiomycota;c__Agaricomycetes;o__Sebacinales;f__Sebacinaceae;g__Sebacina;s__Sebacina_sp	UCL8_007582
22_327	LC013782	Pinus_tabuliformis	China	present_in	SH1731087.08FU	k__Fungi;p__Basidiomycota;c__Agaricomycetes;o__Sebacinales;f__Sebacinaceae;g__Sebacina;s__Sebacina_sp	UCL8_007582
22_332	HM230656	Cymbidium_goeringii	China	present_in	SH1731001.08FU	k__Fungi;p__Basidiomycota;c__Agaricomycetes;o__Sebacinales;f__Sebacinaceae;g__Sebacina;s__Sebacina_sp	UCL8_007582
22_333	HM230657	Cymbidium_goeringii	China	present_in	SH1731001.08FU	k__Fungi;p__Basidiomycota;c__Agaricomycetes;o__Sebacinales;f__Sebacinaceae;g__Sebacina;s__Sebacina_sp	UCL8_007582
22_346	KX444381	Quercus_liaotungensis	China	present_in	SH1731087.08FU	k__Fungi;p__Basidiomycota;c__Agaricomycetes;o__Sebacinales;f__Sebacinaceae;g__Sebacina;s__Sebacina_sp	UCL8_007582
22_347	KY684545	Quercus_sp.	China	duplicate_of_KX444381|Quercus_liaotungensis|China	SH1731087.08FU	k__Fungi;p__Basidiomycota;c__Agaricomycetes;o__Sebacinales;f__Sebacinaceae;g__Sebacina;s__Sebacina_sp	UCL8_007582
22_345	LC013781	Pinus_tabuliformis	China	present_in	SH1731087.08FU	k__Fungi;p__Basidiomycota;c__Agaricomycetes;o__Sebacinales;f__Sebacinaceae;g__Sebacina;s__Sebacina_sp	UCL8_007582
22_348	KX444488	Quercus_liaotungensis	China	present_in	SH1731001.08FU	k__Fungi;p__Basidiomycota;c__Agaricomycetes;o__Sebacinales;f__Sebacinaceae;g__Sebacina;s__Sebacina_sp	UCL8_007582
22_355	LC013787	Pinus_tabuliformis	China	present_in	SH1672842.08FU	k__Fungi;p__Basidiomycota;c__Agaricomycetes;o__Sebacinales;f__Sebacinaceae;g__Sebacina;s__Sebacina_sp	UCL8_001587
22_396	KX444321	Quercus_liaotungensis	China	present_in	SH1682216.08FU	k__Fungi;p__Basidiomycota;c__Agaricomycetes;o__Sebacinales;f__Sebacinaceae;g__Sebacina;s__Sebacina_sp	UCL8_003407
22_397	KY684555	Quercus_sp.	China	duplicate_of_KX444321|Quercus_liaotungensis|China	SH1682216.08FU	k__Fungi;p__Basidiomycota;c__Agaricomycetes;o__Sebacinales;f__Sebacinaceae;g__Sebacina;s__Sebacina_sp	UCL8_003407
22_411	LC035257	Larix_Chinensis	China	present_in	SH1731002.08FU	k__Fungi;p__Basidiomycota;c__Agaricomycetes;o__Sebacinales;f__Sebacinaceae;g__Sebacina;s__Sebacina_sp	UCL8_007582
22_414	LC035258	Larix_Chinensis	China	present_in	SH1731002.08FU	k__Fungi;p__Basidiomycota;c__Agaricomycetes;o__Sebacinales;f__Sebacinaceae;g__Sebacina;s__Sebacina_sp	UCL8_007582
22_442	LC035256	Larix_Chinensis	China	present_in	SH1731002.08FU	k__Fungi;p__Basidiomycota;c__Agaricomycetes;o__Sebacinales;f__Sebacinaceae;g__Sebacina;s__Sebacina_sp	UCL8_007582
22_455	JX129143		China	present_in	SH1672829.08FU	k__Fungi;p__Basidiomycota;c__Agaricomycetes;o__Sebacinales;f__Sebacinaceae;g__Sebacina;s__Sebacina_sp	UCL8_001587
22_460	LC013780	Pinus_tabuliformis	China	present_in	SH1731067.08FU	k__Fungi;p__Basidiomycota;c__Agaricomycetes;o__Sebacinales;f__Sebacinaceae;g__Sebacina;s__Sebacina_sp	UCL8_007582
22_468	FJ803968	Populus_davidiana	China	present_in	SH1672829.08FU	k__Fungi;p__Basidiomycota;c__Agaricomycetes;o__Sebacinales;f__Sebacinaceae;g__Sebacina;s__Sebacina_sp	UCL8_001587
22_492	GU269910	Pinus_tabulaeformis	China	present_in	SH1672851.08FU	k__Fungi;p__Basidiomycota;c__Agaricomycetes;o__Sebacinales;f__Sebacinaceae;g__Sebacina;s__Sebacina_sp	UCL8_001587
22_495	KX510021	Picea_crassifolia	China	present_in	SH1672829.08FU	k__Fungi;p__Basidiomycota;c__Agaricomycetes;o__Sebacinales;f__Sebacinaceae;g__Sebacina;s__Sebacina_sp	UCL8_001587
22_498	JQ991832		China	present_in	SH1731072.08FU	k__Fungi;p__Basidiomycota;c__Agaricomycetes;o__Sebacinales;f__Sebacinaceae;g__Sebacina;s__Sebacina_sp	UCL8_007582
22_504	LC013797	Pinus_tabuliformis	China	present_in	SH1731045.08FU	k__Fungi;p__Basidiomycota;c__Agaricomycetes;o__Sebacinales;f__Sebacinaceae;g__Sebacina;s__Sebacina_sp	UCL8_007582
22_534	HM105558	Quercus	China	present_in	SH1672845.08FU	k__Fungi;p__Basidiomycota;c__Agaricomycetes;o__Sebacinales;f__Sebacinaceae;g__Sebacina;s__Sebacina_sp	UCL8_001587
22_538	FJ803965	Populus_davidiana	China	present_in	SH1672823.08FU	k__Fungi;p__Basidiomycota;c__Agaricomycetes;o__Sebacinales;f__Sebacinaceae;g__Sebacina;s__Sebacina_sp	UCL8_001587
22_577	JQ991835		China	present_in	SH1731108.08FU	k__Fungi;p__Basidiomycota;c__Agaricomycetes;o__Sebacinales;f__Sebacinaceae;g__Sebacina;s__Sebacina_sp	UCL8_007582
22_592	JQ318640	Quercus_liaotungensis	China	present_in	SH1731004.08FU	k__Fungi;p__Basidiomycota;c__Agaricomycetes;o__Sebacinales;f__Sebacinaceae;g__Sebacina;s__Sebacina_sp	UCL8_007582
22_657	LC013791	Pinus_tabuliformis	China	present_in	SH1731050.08FU	k__Fungi;p__Basidiomycota;c__Agaricomycetes;o__Sebacinales;f__Sebacinaceae;g__Sebacina;s__Sebacina_sp	UCL8_007582
22_659	JQ991834		China	present_in	SH1731113.08FU	k__Fungi;p__Basidiomycota;c__Agaricomycetes;o__Sebacinales;f__Sebacinaceae;g__Sebacina;s__Sebacina_sp	UCL8_007582
22_702	JQ991833		China	present_in	SH1731066.08FU	k__Fungi;p__Basidiomycota;c__Agaricomycetes;o__Sebacinales;f__Sebacinaceae;g__Sebacina;s__Sebacina_sp	UCL8_007582
22_716	KM588811	spruce_tree	China	present_in	SH1846794.08FU	k__Fungi;p__Basidiomycota;c__Agaricomycetes;o__Sebacinales;f__Sebacinaceae;g__Sebacina;s__Sebacina_sp	UCL8_016045
22_718	JQ991836		China	present_in	SH1682239.08FU	k__Fungi;p__Basidiomycota;c__Agaricomycetes;o__Sebacinales;f__Sebacinaceae;g__Sebacina;s__Sebacina_sp	UCL8_003407
22_730	JQ318596	Quercus_liaotungensis	China	present_in	SH1731305.08FU	k__Fungi;p__Basidiomycota;c__Agaricomycetes;o__Sebacinales;f__Sebacinaceae;g__Sebacina;s__Sebacina_sp	UCL8_007582
22_762	LC013793	Pinus_tabuliformis	China	present_in	SH1800262.08FU	k__Fungi;p__Basidiomycota;c__Agaricomycetes;o__Sebacinales;f__Sebacinaceae;g__Sebacina;s__Sebacina_sp	UCL8_010859
22_768	GU143027	Pinus_densiflora	China	present_in	SH1731058.08FU	k__Fungi;p__Basidiomycota;c__Agaricomycetes;o__Sebacinales;f__Sebacinaceae;g__Sebacina;s__Sebacina_sp	UCL8_007582
22_773	GQ985424	Pinus_tabulaeformis	China	present_in	SH1731058.08FU	k__Fungi;p__Basidiomycota;c__Agaricomycetes;o__Sebacinales;f__Sebacinaceae;g__Sebacina;s__Sebacina_sp	UCL8_007582
22_788	GU143026	Pinus_densiflora	China	present_in	SH1731058.08FU	k__Fungi;p__Basidiomycota;c__Agaricomycetes;o__Sebacinales;f__Sebacinaceae;g__Sebacina;s__Sebacina_sp	UCL8_007582
22_813	LC013796	Pinus_tabuliformis	China	present_in	SH1731355.08FU	k__Fungi;p__Basidiomycota;c__Agaricomycetes;o__Sebacinales;f__Sebacinaceae;g__Sebacina;s__Sebacina_sp	UCL8_007582
22_844	LC013784	Pinus_tabuliformis	China	present_in	SH1731021.08FU	k__Fungi;p__Basidiomycota;c__Agaricomycetes;o__Sebacinales;f__Sebacinaceae;g__Sebacina;s__Sebacina_sp	UCL8_007582
22_846	JQ318659	Quercus_liaotungensis	China	present_in	SH1731021.08FU	k__Fungi;p__Basidiomycota;c__Agaricomycetes;o__Sebacinales;f__Sebacinaceae;g__Sebacina;s__Sebacina_sp	UCL8_007582
22_851	JF748085	Quercus_wutaishanica	China	duplicate_of_FJ210755||Italy	SH1731021.08FU	k__Fungi;p__Basidiomycota;c__Agaricomycetes;o__Sebacinales;f__Sebacinaceae;g__Sebacina;s__Sebacina_sp	UCL8_007582
22_857	KX510026	Picea_crassifolia	China	present_in	SH1731021.08FU	k__Fungi;p__Basidiomycota;c__Agaricomycetes;o__Sebacinales;f__Sebacinaceae;g__Sebacina;s__Sebacina_sp	UCL8_007582
22_937	LC035275	Larix_Chinensis	China	present_in	SH1682206.08FU	k__Fungi;p__Basidiomycota;c__Agaricomycetes;o__Sebacinales;f__Sebacinaceae;g__Sebacina;s__Sebacina_sp	UCL8_003407
22_939	LC035276	Larix_Chinensis	China	present_in	SH1682206.08FU	k__Fungi;p__Basidiomycota;c__Agaricomycetes;o__Sebacinales;f__Sebacinaceae;g__Sebacina;s__Sebacina_sp	UCL8_003407
22_945	LC035278	Larix_Chinensis	China	present_in	SH1682206.08FU	k__Fungi;p__Basidiomycota;c__Agaricomycetes;o__Sebacinales;f__Sebacinaceae;g__Sebacina;s__Sebacina_sp	UCL8_003407
22_1042	HE814092		China	present_in	SH1682253.08FU	k__Fungi;p__Basidiomycota;c__Agaricomycetes;o__Sebacinales;f__Sebacinaceae;g__Sebacina;s__Sebacina_sp	UCL8_003407
22_1049	Sebacina__JQ666715		China	present_in	SH1731290.08FU	k__Fungi;p__Basidiomycota;c__Agaricomycetes;o__Sebacinales;f__Sebacinaceae;g__Sebacina;s__Sebacina_sp	UCL8_007582
22_1050	GU134523	Pinus_densiflora	China	present_in	SH1672866.08FU	k__Fungi;p__Basidiomycota;c__Agaricomycetes;o__Sebacinales;f__Sebacinaceae;g__Sebacina;s__Sebacina_sp	UCL8_001587
22_1052	KX444253	Quercus_liaotungensis	China	present_in	SH1682224.08FU	k__Fungi;p__Basidiomycota;c__Agaricomycetes;o__Sebacinales;f__Sebacinaceae;g__Sebacina;s__Sebacina_sp	UCL8_003407
22_1067	JN129411	Keteleeria_evelyniana	China	present_in	SH1731175.08FU	k__Fungi;p__Basidiomycota;c__Agaricomycetes;o__Sebacinales;f__Sebacinaceae;g__Sebacina;s__Sebacina_sp	UCL8_007582
22_1081	FJ827241	Potentilla_sp.	China	present_in	SH1682262.08FU	k__Fungi;p__Basidiomycota;c__Agaricomycetes;o__Sebacinales;f__Sebacinaceae;g__Sebacina;s__Sebacina_sp	UCL8_003407
22_1082	HM105507	Quercus	China	present_in	SH1731303.08FU	k__Fungi;p__Basidiomycota;c__Agaricomycetes;o__Sebacinales;f__Sebacinaceae;g__Sebacina;s__Sebacina_sp	UCL8_007582
22_1085	KX444445	Quercus_liaotungensis	China	present_in	SH1731306.08FU	k__Fungi;p__Basidiomycota;c__Agaricomycetes;o__Sebacinales;f__Sebacinaceae;g__Sebacina;s__Sebacina_sp	UCL8_007582
22_1084	JQ318607	Quercus_liaotungensis	China	present_in	SH1682263.08FU	k__Fungi;p__Basidiomycota;c__Agaricomycetes;o__Sebacinales;f__Sebacinaceae;g__Sebacina;s__Sebacina_sp	UCL8_003407
22_1086	KY684548	Quercus_sp.	China	present_in	SH1744110.08FU	k__Fungi;p__Basidiomycota;c__Agaricomycetes;o__Sebacinales;f__Sebacinaceae;g__Sebacina;s__Sebacina_sp	UCL8_008621
22_1087	Sebacina__JQ666677		China	present_in	SH1672872.08FU	k__Fungi;p__Basidiomycota;c__Agaricomycetes;o__Sebacinales;f__Sebacinaceae;g__Sebacina;s__Sebacina_sp	UCL8_001587
22_1100	JQ347202	Kobresia_sp.	China	present_in	SH1682268.08FU	k__Fungi;p__Basidiomycota;c__Agaricomycetes;o__Sebacinales;f__Sebacinaceae;g__Sebacina;s__Sebacina_sp	UCL8_003407
22_1118	FJ378744	Kobresia	China	present_in	SH1682221.08FU	k__Fungi;p__Basidiomycota;c__Agaricomycetes;o__Sebacinales;f__Sebacinaceae;g__Sebacina;s__Sebacina_sp	UCL8_003407
22_1120	FJ827239	Polygonum_sp.	China	present_in	SH1682271.08FU	k__Fungi;p__Basidiomycota;c__Agaricomycetes;o__Sebacinales;f__Sebacinaceae;g__Sebacina;s__Sebacina_sp	UCL8_003407
22_1124	LC013800	Pinus_tabuliformis	China	present_in	SH1682273.08FU	k__Fungi;p__Basidiomycota;c__Agaricomycetes;o__Sebacinales;f__Sebacinaceae;g__Sebacina;s__Sebacina_sp	UCL8_003407
22_1130	KP866133	Pinus_elliottii	China	present_in	SH1682277.08FU	k__Fungi;p__Basidiomycota;c__Agaricomycetes;o__Sebacinales;f__Sebacinaceae;g__Sebacina;s__Sebacina_sp	UCL8_003407
22_1134	GU134517	Pinus_densiflora	China	present_in	SH1731322.08FU	k__Fungi;p__Basidiomycota;c__Agaricomycetes;o__Sebacinales;f__Sebacinaceae;g__Sebacina;s__Sebacina_sp	UCL8_007582
22_1137	JF273541		China	present_in	SH1731187.08FU	k__Fungi;p__Basidiomycota;c__Agaricomycetes;o__Sebacinales;f__Sebacinaceae;g__Sebacina;s__Sebacina_sp	UCL8_007582
22_1149	JQ347195	Polygonum_sp.	China	present_in	SH1731147.08FU	k__Fungi;p__Basidiomycota;c__Agaricomycetes;o__Sebacinales;f__Sebacinaceae;g__Sebacina;s__Sebacina_sp	UCL8_007582
22_1151	KX444320	Quercus_liaotungensis	China	present_in	SH1731337.08FU	k__Fungi;p__Basidiomycota;c__Agaricomycetes;o__Sebacinales;f__Sebacinaceae;g__Sebacina;s__Sebacina_sp	UCL8_007582
22_1159	JQ318606	Quercus_liaotungensis	China	present_in	SH1668388.08FU	k__Fungi;p__Basidiomycota;c__Agaricomycetes;o__Sebacinales;f__Sebacinaceae;g__Sebacina;s__Sebacina_sp	UCL8_000833
22_1144	Sebacina__KT461375		Congo,_The_Democratic_Republic_of_the	present_in	SH1682235.08FU	k__Fungi;p__Basidiomycota;c__Agaricomycetes;o__Sebacinales;f__Sebacinaceae;g__Sebacina;s__Sebacina_sp	UCL8_003407
22_588	Sebacina__UDB009975__sample	Alnus_glutinosa	Croatia	duplicate_of_Sebacina__JN198081||Unspecified	SH1731004.08FU	k__Fungi;p__Basidiomycota;c__Agaricomycetes;o__Sebacinales;f__Sebacinaceae;g__Sebacina;s__Sebacina_sp	UCL8_007582
22_1112	GU327499	Epipactis_atrorubens	Czechia	present_in	SH1731089.08FU	k__Fungi;p__Basidiomycota;c__Agaricomycetes;o__Sebacinales;f__Sebacinaceae;g__Sebacina;s__Sebacina_sp	UCL8_007582
22_112	Sebacina__UDB014606__sample	Bistorta_vivipara	Estonia	present_in	SH1731018.08FU	k__Fungi;p__Basidiomycota;c__Agaricomycetes;o__Sebacinales;f__Sebacinaceae;g__Sebacina;s__Sebacina_sp	UCL8_007582
22_130	FN669247		Estonia	present_in	SH1800271.08FU	k__Fungi;p__Basidiomycota;c__Agaricomycetes;o__Sebacinales;f__Sebacinaceae;g__Sebacina;s__Sebacina_sp	UCL8_010859
22_310	Sebacina__UDB026774__Neottia_nidus-avis_sample	Neottia_nidus-avis	Estonia	present_in	SH1731087.08FU	k__Fungi;p__Basidiomycota;c__Agaricomycetes;o__Sebacinales;f__Sebacinaceae;g__Sebacina;s__Sebacina_sp	UCL8_007582
22_311	Sebacina__UDB026775__Neottia_nidus-avis_sample	Neottia_nidus-avis	Estonia	duplicate_of_Sebacina__UDB026774__Neottia_nidus-avis_sample|Neottia_nidus-avis|Estonia	SH1731087.08FU	k__Fungi;p__Basidiomycota;c__Agaricomycetes;o__Sebacinales;f__Sebacinaceae;g__Sebacina;s__Sebacina_sp	UCL8_007582
22_312	Sebacina__UDB026776__Neottia_nidus-avis_sample	Neottia_nidus-avis	Estonia	duplicate_of_Sebacina__UDB026774__Neottia_nidus-avis_sample|Neottia_nidus-avis|Estonia	SH1731087.08FU	k__Fungi;p__Basidiomycota;c__Agaricomycetes;o__Sebacinales;f__Sebacinaceae;g__Sebacina;s__Sebacina_sp	UCL8_007582
22_313	Sebacina__UDB026777__Neottia_nidus-avis_sample	Neottia_nidus-avis	Estonia	duplicate_of_Sebacina__UDB026774__Neottia_nidus-avis_sample|Neottia_nidus-avis|Estonia	SH1731087.08FU	k__Fungi;p__Basidiomycota;c__Agaricomycetes;o__Sebacinales;f__Sebacinaceae;g__Sebacina;s__Sebacina_sp	UCL8_007582
22_314	Sebacina__UDB026778__Neottia_nidus-avis_sample	Neottia_nidus-avis	Estonia	duplicate_of_Sebacina__UDB026774__Neottia_nidus-avis_sample|Neottia_nidus-avis|Estonia	SH1731087.08FU	k__Fungi;p__Basidiomycota;c__Agaricomycetes;o__Sebacinales;f__Sebacinaceae;g__Sebacina;s__Sebacina_sp	UCL8_007582
22_315	Sebacina__UDB026791__Neottia_nidus-avis_sample	Neottia_nidus-avis	Estonia	duplicate_of_Sebacina__UDB026774__Neottia_nidus-avis_sample|Neottia_nidus-avis|Estonia	SH1731087.08FU	k__Fungi;p__Basidiomycota;c__Agaricomycetes;o__Sebacinales;f__Sebacinaceae;g__Sebacina;s__Sebacina_sp	UCL8_007582
22_316	Sebacina__UDB026792__Neottia_nidus-avis_sample	Neottia_nidus-avis	Estonia	duplicate_of_Sebacina__UDB026774__Neottia_nidus-avis_sample|Neottia_nidus-avis|Estonia	SH1731087.08FU	k__Fungi;p__Basidiomycota;c__Agaricomycetes;o__Sebacinales;f__Sebacinaceae;g__Sebacina;s__Sebacina_sp	UCL8_007582
22_317	Sebacina__UDB026793__Neottia_nidus-avis_sample	Neottia_nidus-avis	Estonia	duplicate_of_Sebacina__UDB026774__Neottia_nidus-avis_sample|Neottia_nidus-avis|Estonia	SH1731087.08FU	k__Fungi;p__Basidiomycota;c__Agaricomycetes;o__Sebacinales;f__Sebacinaceae;g__Sebacina;s__Sebacina_sp	UCL8_007582
22_318	Sebacina__UDB026798__Neottia_nidus-avis_sample	Neottia_nidus-avis	Estonia	duplicate_of_Sebacina__UDB026774__Neottia_nidus-avis_sample|Neottia_nidus-avis|Estonia	SH1731087.08FU	k__Fungi;p__Basidiomycota;c__Agaricomycetes;o__Sebacinales;f__Sebacinaceae;g__Sebacina;s__Sebacina_sp	UCL8_007582
22_319	Sebacina__UDB016332__TU115476		Estonia	present_in	SH1731352.08FU	k__Fungi;p__Basidiomycota;c__Agaricomycetes;o__Sebacinales;f__Sebacinaceae;g__Sebacina;s__Sebacina_sp	UCL8_007582
22_326	Sebacina__UDB007988__sample	Betula_pendula	Estonia	duplicate_of_HE687117||Iran,_Islamic_Republic_of	SH1731087.08FU	k__Fungi;p__Basidiomycota;c__Agaricomycetes;o__Sebacinales;f__Sebacinaceae;g__Sebacina;s__Sebacina_sp	UCL8_007582
22_354	Sebacina__UDB014604__sample	Bistorta_vivipara	Estonia	present_in	SH1672842.08FU	k__Fungi;p__Basidiomycota;c__Agaricomycetes;o__Sebacinales;f__Sebacinaceae;g__Sebacina;s__Sebacina_sp	UCL8_001587
22_381	Sebacina__UDB014509__sample	Tilia_cordata	Estonia	present_in	SH1682200.08FU	k__Fungi;p__Basidiomycota;c__Agaricomycetes;o__Sebacinales;f__Sebacinaceae;g__Sebacina;s__Sebacina_sp	UCL8_003407
22_393	Sebacina__UDB025864__Bistorta_vivipara_sample	Bistorta_vivipara	Estonia	present_in	SH1682216.08FU	k__Fungi;p__Basidiomycota;c__Agaricomycetes;o__Sebacinales;f__Sebacinaceae;g__Sebacina;s__Sebacina_sp	UCL8_003407
22_395	Sebacina__UDB025863__Bistorta_vivipara_sample	Bistorta_vivipara	Estonia	present_in	SH1682216.08FU	k__Fungi;p__Basidiomycota;c__Agaricomycetes;o__Sebacinales;f__Sebacinaceae;g__Sebacina;s__Sebacina_sp	UCL8_003407
22_403	Sebacina_dimitica__UDB016333__TU115477		Estonia	present_in	SH1731002.08FU	k__Fungi;p__Basidiomycota;c__Agaricomycetes;o__Sebacinales;f__Sebacinaceae;g__Sebacina;s__Sebacina_sp	UCL8_007582
22_407	Sebacina__UDB014568__sample	Tilia_cordata	Estonia	present_in	SH1731002.08FU	k__Fungi;p__Basidiomycota;c__Agaricomycetes;o__Sebacinales;f__Sebacinaceae;g__Sebacina;s__Sebacina_sp	UCL8_007582
22_409	Sebacina__UDB026204__Pyrola_rotundifolia_sample	Pyrola_rotundifolia	Estonia	present_in	SH1731002.08FU	k__Fungi;p__Basidiomycota;c__Agaricomycetes;o__Sebacinales;f__Sebacinaceae;g__Sebacina;s__Sebacina_sp	UCL8_007582
22_428	Sebacina__UDB002604__sample	Picea_abies	Estonia	present_in	SH1731002.08FU	k__Fungi;p__Basidiomycota;c__Agaricomycetes;o__Sebacinales;f__Sebacinaceae;g__Sebacina;s__Sebacina_sp	UCL8_007582
22_430	Sebacina__UDB007331__sample	Picea_abies	Estonia	duplicate_of_Sebacina__UDB002604__sample|Picea_abies|Estonia	SH1731002.08FU	k__Fungi;p__Basidiomycota;c__Agaricomycetes;o__Sebacinales;f__Sebacinaceae;g__Sebacina;s__Sebacina_sp	UCL8_007582
22_431	Sebacina__UDB007332__sample	Picea_abies	Estonia	duplicate_of_Sebacina__UDB002604__sample|Picea_abies|Estonia	SH1731002.08FU	k__Fungi;p__Basidiomycota;c__Agaricomycetes;o__Sebacinales;f__Sebacinaceae;g__Sebacina;s__Sebacina_sp	UCL8_007582
22_433	Sebacina__UDB017311__sample	Picea_abies	Estonia	duplicate_of_Sebacina__UDB002604__sample|Picea_abies|Estonia	SH1731002.08FU	k__Fungi;p__Basidiomycota;c__Agaricomycetes;o__Sebacinales;f__Sebacinaceae;g__Sebacina;s__Sebacina_sp	UCL8_007582
22_432	Sebacina__UDB016385__TU115528		Estonia	present_in	SH1731002.08FU	k__Fungi;p__Basidiomycota;c__Agaricomycetes;o__Sebacinales;f__Sebacinaceae;g__Sebacina;s__Sebacina_sp	UCL8_007582
22_451	Sebacina__UDB007330__sample	Picea_abies	Estonia	present_in	SH1731002.08FU	k__Fungi;p__Basidiomycota;c__Agaricomycetes;o__Sebacinales;f__Sebacinaceae;g__Sebacina;s__Sebacina_sp	UCL8_007582
22_452	Sebacina__UDB017364__sample	Picea_abies	Estonia	duplicate_of_Sebacina__UDB007330__sample|Picea_abies|Estonia	SH1731002.08FU	k__Fungi;p__Basidiomycota;c__Agaricomycetes;o__Sebacinales;f__Sebacinaceae;g__Sebacina;s__Sebacina_sp	UCL8_007582
22_457	Sebacina__UDB016419__TU115566		Estonia	present_in	SH1672829.08FU	k__Fungi;p__Basidiomycota;c__Agaricomycetes;o__Sebacinales;f__Sebacinaceae;g__Sebacina;s__Sebacina_sp	UCL8_001587
22_465	Sebacina_epigaea__UDB014112__TU110839		Estonia	present_in	SH1672829.08FU	k__Fungi;p__Basidiomycota;c__Agaricomycetes;o__Sebacinales;f__Sebacinaceae;g__Sebacina;s__Sebacina_sp	UCL8_001587
22_502	Sebacina__UDB013673__sample	Tilia	Estonia	present_in	SH1731031.08FU	k__Fungi;p__Basidiomycota;c__Agaricomycetes;o__Sebacinales;f__Sebacinaceae;g__Sebacina;s__Sebacina_sp	UCL8_007582
22_505	Sebacina__UDB013512__sample	Tilia	Estonia	present_in	SH1672855.08FU	k__Fungi;p__Basidiomycota;c__Agaricomycetes;o__Sebacinales;f__Sebacinaceae;g__Sebacina;s__Sebacina_sp	UCL8_001587
22_570	Sebacina__UDB005095__sample	Populus	Estonia	present_in	SH1672831.08FU	k__Fungi;p__Basidiomycota;c__Agaricomycetes;o__Sebacinales;f__Sebacinaceae;g__Sebacina;s__Sebacina_sp	UCL8_001587
22_571	FN669251		Estonia	present_in	SH1672831.08FU	k__Fungi;p__Basidiomycota;c__Agaricomycetes;o__Sebacinales;f__Sebacinaceae;g__Sebacina;s__Sebacina_sp	UCL8_001587
22_572	Sebacina__UDB005131__sample	Populus	Estonia	duplicate_of_FN669251||Estonia	SH1672831.08FU	k__Fungi;p__Basidiomycota;c__Agaricomycetes;o__Sebacinales;f__Sebacinaceae;g__Sebacina;s__Sebacina_sp	UCL8_001587
22_575	DQ150132	Cephalanthera_longifolia	Estonia	present_in	SH1672882.08FU	k__Fungi;p__Basidiomycota;c__Agaricomycetes;o__Sebacinales;f__Sebacinaceae;g__Sebacina;s__Sebacina_sp	UCL8_001587
22_581	Sebacina__UDB025900__Pyrola_rotundifolia_sample	Pyrola_rotundifolia	Estonia	present_in	SH1731004.08FU	k__Fungi;p__Basidiomycota;c__Agaricomycetes;o__Sebacinales;f__Sebacinaceae;g__Sebacina;s__Sebacina_sp	UCL8_007582
22_584	Sebacina__UDB016431__TU115580		Estonia	present_in	SH1731004.08FU	k__Fungi;p__Basidiomycota;c__Agaricomycetes;o__Sebacinales;f__Sebacinaceae;g__Sebacina;s__Sebacina_sp	UCL8_007582
22_590	Sebacina__UDB017399__sample	Tilia	Estonia	present_in	SH1731004.08FU	k__Fungi;p__Basidiomycota;c__Agaricomycetes;o__Sebacinales;f__Sebacinaceae;g__Sebacina;s__Sebacina_sp	UCL8_007582
22_649	Sebacina__UDB026412__Populus_tremula_sample	Populus_tremula	Estonia	present_in	SH1672845.08FU	k__Fungi;p__Basidiomycota;c__Agaricomycetes;o__Sebacinales;f__Sebacinaceae;g__Sebacina;s__Sebacina_sp	UCL8_001587
22_706	Sebacina__UDB026779__Neottia_nidus-avis_sample	Neottia_nidus-avis	Estonia	present_in	SH1731011.08FU	k__Fungi;p__Basidiomycota;c__Agaricomycetes;o__Sebacinales;f__Sebacinaceae;g__Sebacina;s__Sebacina_sp	UCL8_007582
22_709	Sebacina__UDB013732__sample	Salix_caprea	Estonia	present_in	SH1744102.08FU	k__Fungi;p__Basidiomycota;c__Agaricomycetes;o__Sebacinales;f__Sebacinaceae;g__Sebacina;s__Sebacina_sp	UCL8_008621
22_710	Sebacina__UDB013733__sample	Salix_caprea	Estonia	duplicate_of_Sebacina__UDB013732__sample|Salix_caprea|Estonia	SH1744102.08FU	k__Fungi;p__Basidiomycota;c__Agaricomycetes;o__Sebacinales;f__Sebacinaceae;g__Sebacina;s__Sebacina_sp	UCL8_008621
22_711	Sebacina__UDB025872__Pyrola_rotundifolia_sample	Pyrola_rotundifolia	Estonia	duplicate_of_Sebacina__UDB013732__sample|Salix_caprea|Estonia	SH1744102.08FU	k__Fungi;p__Basidiomycota;c__Agaricomycetes;o__Sebacinales;f__Sebacinaceae;g__Sebacina;s__Sebacina_sp	UCL8_008621
22_713	Sebacina__UDB026642__Bistorta_vivipara_sample	Bistorta_vivipara	Estonia	duplicate_of_Sebacina__UDB013732__sample|Salix_caprea|Estonia	SH1744102.08FU	k__Fungi;p__Basidiomycota;c__Agaricomycetes;o__Sebacinales;f__Sebacinaceae;g__Sebacina;s__Sebacina_sp	UCL8_008621
22_828	Sebacina_incrustans__UDB014118__TU110847	Angiospermae	Estonia	present_in	SH1731033.08FU	k__Fungi;p__Basidiomycota;c__Agaricomycetes;o__Sebacinales;f__Sebacinaceae;g__Sebacina;s__Sebacina_sp	UCL8_007582
22_950	Sebacina__UDB007985__sample	Betula_pendula	Estonia	present_in	SH1800252.08FU	k__Fungi;p__Basidiomycota;c__Agaricomycetes;o__Sebacinales;f__Sebacinaceae;g__Sebacina;s__Sebacina_sp	UCL8_010859
22_951	Sebacina__UDB008021__sample	Quercus_robur	Estonia	present_in	SH1800252.08FU	k__Fungi;p__Basidiomycota;c__Agaricomycetes;o__Sebacinales;f__Sebacinaceae;g__Sebacina;s__Sebacina_sp	UCL8_010859
22_954	Sebacina_incrustans__UDB014117__TU110846		Estonia	present_in	SH1800252.08FU	k__Fungi;p__Basidiomycota;c__Agaricomycetes;o__Sebacinales;f__Sebacinaceae;g__Sebacina;s__Sebacina_sp	UCL8_010859
22_1001	Sebacina__UDB027313__Alnus_glutinosa_sample	Alnus_glutinosa	Estonia	present_in	SH1672832.08FU	k__Fungi;p__Basidiomycota;c__Agaricomycetes;o__Sebacinales;f__Sebacinaceae;g__Sebacina;s__Sebacina_sp	UCL8_001587
22_1037	FN669252		Estonia	present_in	SH1731275.08FU	k__Fungi;p__Basidiomycota;c__Agaricomycetes;o__Sebacinales;f__Sebacinaceae;g__Sebacina;s__Sebacina_sp	UCL8_007582
22_1111	AJ893256	Betula_pendula	Estonia	present_in	SH1731089.08FU	k__Fungi;p__Basidiomycota;c__Agaricomycetes;o__Sebacinales;f__Sebacinaceae;g__Sebacina;s__Sebacina_sp	UCL8_007582
22_1114	Sebacina__AJ893256_duplic1		Estonia	duplicate_of_AJ893256|Betula_pendula|Estonia	SH1731089.08FU	k__Fungi;p__Basidiomycota;c__Agaricomycetes;o__Sebacinales;f__Sebacinaceae;g__Sebacina;s__Sebacina_sp	UCL8_007582
22_1142	Sebacina__EU668944__sample	Pyrola_rotundifolia	Estonia	present_in	SH1731329.08FU	k__Fungi;p__Basidiomycota;c__Agaricomycetes;o__Sebacinales;f__Sebacinaceae;g__Sebacina;s__Sebacina_sp	UCL8_007582
22_522	Sebacina__UDB026818__Dryas_octopetala_sample	Dryas_octopetala	Finland	present_in	SH1672823.08FU	k__Fungi;p__Basidiomycota;c__Agaricomycetes;o__Sebacinales;f__Sebacinaceae;g__Sebacina;s__Sebacina_sp	UCL8_001587
22_443	KU924629	Alnus_cordata	France	present_in	SH1731002.08FU	k__Fungi;p__Basidiomycota;c__Agaricomycetes;o__Sebacinales;f__Sebacinaceae;g__Sebacina;s__Sebacina_sp	UCL8_007582
22_444	KU924626	Alnus_cordata	France	present_in	SH1731002.08FU	k__Fungi;p__Basidiomycota;c__Agaricomycetes;o__Sebacinales;f__Sebacinaceae;g__Sebacina;s__Sebacina_sp	UCL8_007582
22_445	KU924627	Alnus_cordata	France	present_in	SH1731002.08FU	k__Fungi;p__Basidiomycota;c__Agaricomycetes;o__Sebacinales;f__Sebacinaceae;g__Sebacina;s__Sebacina_sp	UCL8_007582
22_446	KU924628	Alnus_cordata	France	present_in	SH1731002.08FU	k__Fungi;p__Basidiomycota;c__Agaricomycetes;o__Sebacinales;f__Sebacinaceae;g__Sebacina;s__Sebacina_sp	UCL8_007582
22_787	Sebacina__KM247668		France	duplicate_of_EU668220|Fagus_sylvatica|United_Kingdom	SH1731010.08FU	k__Fungi;p__Basidiomycota;c__Agaricomycetes;o__Sebacinales;f__Sebacinaceae;g__Sebacina;s__Sebacina_sp	UCL8_007582
22_803	KU924634	Alnus_glutinosa	France	present_in	SH1731010.08FU	k__Fungi;p__Basidiomycota;c__Agaricomycetes;o__Sebacinales;f__Sebacinaceae;g__Sebacina;s__Sebacina_sp	UCL8_007582
22_802	JQ890308	Alnus	France	present_in	SH1731010.08FU	k__Fungi;p__Basidiomycota;c__Agaricomycetes;o__Sebacinales;f__Sebacinaceae;g__Sebacina;s__Sebacina_sp	UCL8_007582
22_804	KU924636	Alnus_glutinosa	France	present_in	SH1731010.08FU	k__Fungi;p__Basidiomycota;c__Agaricomycetes;o__Sebacinales;f__Sebacinaceae;g__Sebacina;s__Sebacina_sp	UCL8_007582
22_805	KU924637	Alnus_glutinosa	France	duplicate_of_KU924636|Alnus_glutinosa|France	SH1731010.08FU	k__Fungi;p__Basidiomycota;c__Agaricomycetes;o__Sebacinales;f__Sebacinaceae;g__Sebacina;s__Sebacina_sp	UCL8_007582
22_806	Sebacina__JX989955	Alnus_sp.	France	duplicate_of_KU924636|Alnus_glutinosa|France	SH1731010.08FU	k__Fungi;p__Basidiomycota;c__Agaricomycetes;o__Sebacinales;f__Sebacinaceae;g__Sebacina;s__Sebacina_sp	UCL8_007582
22_807	Sebacina__JX990067	Alnus_sp.	France	present_in	SH1731010.08FU	k__Fungi;p__Basidiomycota;c__Agaricomycetes;o__Sebacinales;f__Sebacinaceae;g__Sebacina;s__Sebacina_sp	UCL8_007582
22_809	KU924635	Alnus_glutinosa	France	present_in	SH1731010.08FU	k__Fungi;p__Basidiomycota;c__Agaricomycetes;o__Sebacinales;f__Sebacinaceae;g__Sebacina;s__Sebacina_sp	UCL8_007582
22_811	Sebacina__JX989840	Alnus_sp.	France	present_in	SH1731010.08FU	k__Fungi;p__Basidiomycota;c__Agaricomycetes;o__Sebacinales;f__Sebacinaceae;g__Sebacina;s__Sebacina_sp	UCL8_007582
22_833	AF440664		France	present_in	SH1731033.08FU	k__Fungi;p__Basidiomycota;c__Agaricomycetes;o__Sebacinales;f__Sebacinaceae;g__Sebacina;s__Sebacina_sp	UCL8_007582
22_834	AF465185		France	duplicate_of_AF440664||France	SH1731033.08FU	k__Fungi;p__Basidiomycota;c__Agaricomycetes;o__Sebacinales;f__Sebacinaceae;g__Sebacina;s__Sebacina_sp	UCL8_007582
22_856	Sebacina__KM247636		France	present_in	SH1731021.08FU	k__Fungi;p__Basidiomycota;c__Agaricomycetes;o__Sebacinales;f__Sebacinaceae;g__Sebacina;s__Sebacina_sp	UCL8_007582
22_899	Sebacina__HQ204733__sample	Quercus_ilex	France	present_in	SH1672859.08FU	k__Fungi;p__Basidiomycota;c__Agaricomycetes;o__Sebacinales;f__Sebacinaceae;g__Sebacina;s__Sebacina_sp	UCL8_001587
22_905	AF440661	Neottia_nidus-avis	France	present_in	SH1682199.08FU	k__Fungi;p__Basidiomycota;c__Agaricomycetes;o__Sebacinales;f__Sebacinaceae;g__Sebacina;s__Sebacina_sp	UCL8_003407
22_908	AF440646	Neottia_nidus-avis	France	present_in	SH1682199.08FU	k__Fungi;p__Basidiomycota;c__Agaricomycetes;o__Sebacinales;f__Sebacinaceae;g__Sebacina;s__Sebacina_sp	UCL8_003407
22_910	AF440658	Neottia_nidus-avis	France	present_in	SH1682199.08FU	k__Fungi;p__Basidiomycota;c__Agaricomycetes;o__Sebacinales;f__Sebacinaceae;g__Sebacina;s__Sebacina_sp	UCL8_003407
22_909	AF440650	Neottia_nidus-avis	France	present_in	SH1682199.08FU	k__Fungi;p__Basidiomycota;c__Agaricomycetes;o__Sebacinales;f__Sebacinaceae;g__Sebacina;s__Sebacina_sp	UCL8_003407
22_921	Sebacina__AF440650_duplic1__sample	Neottia_nidus-avis	France	duplicate_of_AF440650|Neottia_nidus-avis|France	SH1682199.08FU	k__Fungi;p__Basidiomycota;c__Agaricomycetes;o__Sebacinales;f__Sebacinaceae;g__Sebacina;s__Sebacina_sp	UCL8_003407
22_912	AY286193	Epipactis_microphylla	France	present_in	SH1682199.08FU	k__Fungi;p__Basidiomycota;c__Agaricomycetes;o__Sebacinales;f__Sebacinaceae;g__Sebacina;s__Sebacina_sp	UCL8_003407
22_922	AF440659	Neottia_nidus-avis	France	present_in	SH1682199.08FU	k__Fungi;p__Basidiomycota;c__Agaricomycetes;o__Sebacinales;f__Sebacinaceae;g__Sebacina;s__Sebacina_sp	UCL8_003407
22_1004	HQ204720	Quercus_ilex	France	present_in	SH1672832.08FU	k__Fungi;p__Basidiomycota;c__Agaricomycetes;o__Sebacinales;f__Sebacinaceae;g__Sebacina;s__Sebacina_sp	UCL8_001587
22_1015	Sebacina__KM247648		France	present_in	SH1731140.08FU	k__Fungi;p__Basidiomycota;c__Agaricomycetes;o__Sebacinales;f__Sebacinaceae;g__Sebacina;s__Sebacina_sp	UCL8_007582
22_1083	JF506812	Quercus_ilex	France	present_in	SH1800294.08FU	k__Fungi;p__Basidiomycota;c__Agaricomycetes;o__Sebacinales;f__Sebacinaceae;g__Sebacina;s__Sebacina_sp	UCL8_010859
22_1099	JF506808	Quercus_ilex	France	present_in	SH1682266.08FU	k__Fungi;p__Basidiomycota;c__Agaricomycetes;o__Sebacinales;f__Sebacinaceae;g__Sebacina;s__Sebacina_sp	UCL8_003407
22_1098	JF506806	Quercus_ilex	France	present_in	SH1672877.08FU	k__Fungi;p__Basidiomycota;c__Agaricomycetes;o__Sebacinales;f__Sebacinaceae;g__Sebacina;s__Sebacina_sp	UCL8_001587
22_1121	JF506809	Quercus_ilex	France	present_in	SH1731314.08FU	k__Fungi;p__Basidiomycota;c__Agaricomycetes;o__Sebacinales;f__Sebacinaceae;g__Sebacina;s__Sebacina_sp	UCL8_007582
22_1122	JF506810	Quercus_ilex	France	present_in	SH1731312.08FU	k__Fungi;p__Basidiomycota;c__Agaricomycetes;o__Sebacinales;f__Sebacinaceae;g__Sebacina;s__Sebacina_sp	UCL8_007582
22_1129	AF440647	Neottia_nidus-avis	France	present_in	SH1682275.08FU	k__Fungi;p__Basidiomycota;c__Agaricomycetes;o__Sebacinales;f__Sebacinaceae;g__Sebacina;s__Sebacina_sp	UCL8_003407
22_1138	KU924632	Alnus_glutinosa	France	present_in	SH1800268.08FU	k__Fungi;p__Basidiomycota;c__Agaricomycetes;o__Sebacinales;f__Sebacinaceae;g__Sebacina;s__Sebacina_sp	UCL8_010859
22_1160	FM995580	Quercus_petraea	France	present_in	SH1731354.08FU	k__Fungi;p__Basidiomycota;c__Agaricomycetes;o__Sebacinales;f__Sebacinaceae;g__Sebacina;s__Sebacina_sp	UCL8_007582
22_22	KF000608	Bistorta_vivipara	Germany	present_in	SH1731234.08FU	k__Fungi;p__Basidiomycota;c__Agaricomycetes;o__Sebacinales;f__Sebacinaceae;g__Sebacina;s__Sebacina_sp	UCL8_007582
22_119	HQ154315	Ribes	Germany	present_in	SH1731018.08FU	k__Fungi;p__Basidiomycota;c__Agaricomycetes;o__Sebacinales;f__Sebacinaceae;g__Sebacina;s__Sebacina_sp	UCL8_007582
22_120	HQ154345	Soldanella_alpina	Germany	present_in	SH1731018.08FU	k__Fungi;p__Basidiomycota;c__Agaricomycetes;o__Sebacinales;f__Sebacinaceae;g__Sebacina;s__Sebacina_sp	UCL8_007582
22_122	KC986285	Bistorta_vivipara	Germany	present_in	SH1731018.08FU	k__Fungi;p__Basidiomycota;c__Agaricomycetes;o__Sebacinales;f__Sebacinaceae;g__Sebacina;s__Sebacina_sp	UCL8_007582
22_123	KC986286	Bistorta_vivipara	Germany	duplicate_of_KC986285|Bistorta_vivipara|Germany	SH1731018.08FU	k__Fungi;p__Basidiomycota;c__Agaricomycetes;o__Sebacinales;f__Sebacinaceae;g__Sebacina;s__Sebacina_sp	UCL8_007582
22_124	KF000482	Bistorta_vivipara	Germany	present_in	SH1731018.08FU	k__Fungi;p__Basidiomycota;c__Agaricomycetes;o__Sebacinales;f__Sebacinaceae;g__Sebacina;s__Sebacina_sp	UCL8_007582
22_331	Sebacina__KF000598	Bistorta_vivipara	Germany	present_in	SH1731087.08FU	k__Fungi;p__Basidiomycota;c__Agaricomycetes;o__Sebacinales;f__Sebacinaceae;g__Sebacina;s__Sebacina_sp	UCL8_007582
22_334	KF000635	Bistorta_vivipara	Germany	present_in	SH1731087.08FU	k__Fungi;p__Basidiomycota;c__Agaricomycetes;o__Sebacinales;f__Sebacinaceae;g__Sebacina;s__Sebacina_sp	UCL8_007582
22_336	FJ556815	Lapsana_communis	Germany	present_in	SH1731001.08FU	k__Fungi;p__Basidiomycota;c__Agaricomycetes;o__Sebacinales;f__Sebacinaceae;g__Sebacina;s__Sebacina_sp	UCL8_007582
22_339	HQ154271	Picea_abies	Germany	present_in	SH1731087.08FU	k__Fungi;p__Basidiomycota;c__Agaricomycetes;o__Sebacinales;f__Sebacinaceae;g__Sebacina;s__Sebacina_sp	UCL8_007582
22_340	HQ154332	Viola_reichenbachiana	Germany	present_in	SH1731087.08FU	k__Fungi;p__Basidiomycota;c__Agaricomycetes;o__Sebacinales;f__Sebacinaceae;g__Sebacina;s__Sebacina_sp	UCL8_007582
22_341	JQ665506		Germany	present_in	SH1731087.08FU	k__Fungi;p__Basidiomycota;c__Agaricomycetes;o__Sebacinales;f__Sebacinaceae;g__Sebacina;s__Sebacina_sp	UCL8_007582
22_342	JQ665507		Germany	duplicate_of_JQ665506||Germany	SH1731087.08FU	k__Fungi;p__Basidiomycota;c__Agaricomycetes;o__Sebacinales;f__Sebacinaceae;g__Sebacina;s__Sebacina_sp	UCL8_007582
22_343	JQ665508		Germany	duplicate_of_JQ665506||Germany	SH1731087.08FU	k__Fungi;p__Basidiomycota;c__Agaricomycetes;o__Sebacinales;f__Sebacinaceae;g__Sebacina;s__Sebacina_sp	UCL8_007582
22_344	KF000451		Germany	duplicate_of_JQ665506||Germany	SH1731087.08FU	k__Fungi;p__Basidiomycota;c__Agaricomycetes;o__Sebacinales;f__Sebacinaceae;g__Sebacina;s__Sebacina_sp	UCL8_007582
22_349	KF000614	Bistorta_vivipara	Germany	present_in	SH1731001.08FU	k__Fungi;p__Basidiomycota;c__Agaricomycetes;o__Sebacinales;f__Sebacinaceae;g__Sebacina;s__Sebacina_sp	UCL8_007582
22_351	EU668268		Germany	present_in	SH1731352.08FU	k__Fungi;p__Basidiomycota;c__Agaricomycetes;o__Sebacinales;f__Sebacinaceae;g__Sebacina;s__Sebacina_sp	UCL8_007582
22_352	JQ665509		Germany	present_in	SH1731001.08FU	k__Fungi;p__Basidiomycota;c__Agaricomycetes;o__Sebacinales;f__Sebacinaceae;g__Sebacina;s__Sebacina_sp	UCL8_007582
22_353	JQ665510		Germany	duplicate_of_JQ665509||Germany	SH1731001.08FU	k__Fungi;p__Basidiomycota;c__Agaricomycetes;o__Sebacinales;f__Sebacinaceae;g__Sebacina;s__Sebacina_sp	UCL8_007582
22_412	KF000671	Bistorta_vivipara	Germany	present_in	SH1731002.08FU	k__Fungi;p__Basidiomycota;c__Agaricomycetes;o__Sebacinales;f__Sebacinaceae;g__Sebacina;s__Sebacina_sp	UCL8_007582
22_426	HQ154413	Oxalis_acetosella	Germany	present_in	SH1731002.08FU	k__Fungi;p__Basidiomycota;c__Agaricomycetes;o__Sebacinales;f__Sebacinaceae;g__Sebacina;s__Sebacina_sp	UCL8_007582
22_434	HQ154279	Campanula_scheuchzeri	Germany	present_in	SH1731002.08FU	k__Fungi;p__Basidiomycota;c__Agaricomycetes;o__Sebacinales;f__Sebacinaceae;g__Sebacina;s__Sebacina_sp	UCL8_007582
22_436	HQ154346	Soldanella_alpina	Germany	duplicate_of_HQ154279|Campanula_scheuchzeri|Germany	SH1731002.08FU	k__Fungi;p__Basidiomycota;c__Agaricomycetes;o__Sebacinales;f__Sebacinaceae;g__Sebacina;s__Sebacina_sp	UCL8_007582
22_435	HQ154281	Campanula_scheuchzeri	Germany	present_in	SH1731002.08FU	k__Fungi;p__Basidiomycota;c__Agaricomycetes;o__Sebacinales;f__Sebacinaceae;g__Sebacina;s__Sebacina_sp	UCL8_007582
22_441	HQ154412	Oxalis_acetosella	Germany	present_in	SH1731002.08FU	k__Fungi;p__Basidiomycota;c__Agaricomycetes;o__Sebacinales;f__Sebacinaceae;g__Sebacina;s__Sebacina_sp	UCL8_007582
22_466	HQ154308	Valeriana_saxatilis	Germany	present_in	SH1731132.08FU	k__Fungi;p__Basidiomycota;c__Agaricomycetes;o__Sebacinales;f__Sebacinaceae;g__Sebacina;s__Sebacina_sp	UCL8_007582
22_470	JQ665482		Germany	present_in	SH1672829.08FU	k__Fungi;p__Basidiomycota;c__Agaricomycetes;o__Sebacinales;f__Sebacinaceae;g__Sebacina;s__Sebacina_sp	UCL8_001587
22_474	KC986244	Bistorta_vivipara	Germany	duplicate_of_JQ665482||Germany	SH1672829.08FU	k__Fungi;p__Basidiomycota;c__Agaricomycetes;o__Sebacinales;f__Sebacinaceae;g__Sebacina;s__Sebacina_sp	UCL8_001587
22_475	KC986245	Bistorta_vivipara	Germany	duplicate_of_JQ665482||Germany	SH1672829.08FU	k__Fungi;p__Basidiomycota;c__Agaricomycetes;o__Sebacinales;f__Sebacinaceae;g__Sebacina;s__Sebacina_sp	UCL8_001587
22_469	HQ154356	Acer_pseudoplatanus	Germany	present_in	SH1672829.08FU	k__Fungi;p__Basidiomycota;c__Agaricomycetes;o__Sebacinales;f__Sebacinaceae;g__Sebacina;s__Sebacina_sp	UCL8_001587
22_471	JQ665483		Germany	present_in	SH1672829.08FU	k__Fungi;p__Basidiomycota;c__Agaricomycetes;o__Sebacinales;f__Sebacinaceae;g__Sebacina;s__Sebacina_sp	UCL8_001587
22_473	KC986242	Bistorta_vivipara	Germany	present_in	SH1672829.08FU	k__Fungi;p__Basidiomycota;c__Agaricomycetes;o__Sebacinales;f__Sebacinaceae;g__Sebacina;s__Sebacina_sp	UCL8_001587
22_496	Sebacina__FJ403497__sample	Fagus_sylvatica	Germany	present_in	SH1800280.08FU	k__Fungi;p__Basidiomycota;c__Agaricomycetes;o__Sebacinales;f__Sebacinaceae;g__Sebacina;s__Sebacina_sp	UCL8_010859
22_573	KF000591	Bistorta_vivipara	Germany	present_in	SH1672831.08FU	k__Fungi;p__Basidiomycota;c__Agaricomycetes;o__Sebacinales;f__Sebacinaceae;g__Sebacina;s__Sebacina_sp	UCL8_001587
22_591	KF000634	Bistorta_vivipara	Germany	present_in	SH1731004.08FU	k__Fungi;p__Basidiomycota;c__Agaricomycetes;o__Sebacinales;f__Sebacinaceae;g__Sebacina;s__Sebacina_sp	UCL8_007582
22_594	EU668269		Germany	present_in	SH1731004.08FU	k__Fungi;p__Basidiomycota;c__Agaricomycetes;o__Sebacinales;f__Sebacinaceae;g__Sebacina;s__Sebacina_sp	UCL8_007582
22_595	HQ154220	Astrantia_major	Germany	duplicate_of_EU668269||Germany	SH1731004.08FU	k__Fungi;p__Basidiomycota;c__Agaricomycetes;o__Sebacinales;f__Sebacinaceae;g__Sebacina;s__Sebacina_sp	UCL8_007582
22_598	HQ154327	Equisetum_sylvaticum	Germany	duplicate_of_EU668269||Germany	SH1731004.08FU	k__Fungi;p__Basidiomycota;c__Agaricomycetes;o__Sebacinales;f__Sebacinaceae;g__Sebacina;s__Sebacina_sp	UCL8_007582
22_599	JQ420987	Aposeris_foetida	Germany	duplicate_of_EU668269||Germany	SH1731004.08FU	k__Fungi;p__Basidiomycota;c__Agaricomycetes;o__Sebacinales;f__Sebacinaceae;g__Sebacina;s__Sebacina_sp	UCL8_007582
22_600	JQ665503		Germany	duplicate_of_EU668269||Germany	SH1731004.08FU	k__Fungi;p__Basidiomycota;c__Agaricomycetes;o__Sebacinales;f__Sebacinaceae;g__Sebacina;s__Sebacina_sp	UCL8_007582
22_601	JQ665504		Germany	duplicate_of_EU668269||Germany	SH1731004.08FU	k__Fungi;p__Basidiomycota;c__Agaricomycetes;o__Sebacinales;f__Sebacinaceae;g__Sebacina;s__Sebacina_sp	UCL8_007582
22_602	JQ665505		Germany	duplicate_of_EU668269||Germany	SH1731004.08FU	k__Fungi;p__Basidiomycota;c__Agaricomycetes;o__Sebacinales;f__Sebacinaceae;g__Sebacina;s__Sebacina_sp	UCL8_007582
22_605	KF000445		Germany	duplicate_of_EU668269||Germany	SH1731004.08FU	k__Fungi;p__Basidiomycota;c__Agaricomycetes;o__Sebacinales;f__Sebacinaceae;g__Sebacina;s__Sebacina_sp	UCL8_007582
22_606	KF000571	Bistorta_vivipara	Germany	duplicate_of_EU668269||Germany	SH1731004.08FU	k__Fungi;p__Basidiomycota;c__Agaricomycetes;o__Sebacinales;f__Sebacinaceae;g__Sebacina;s__Sebacina_sp	UCL8_007582
22_607	KF000572	Bistorta_vivipara	Germany	duplicate_of_EU668269||Germany	SH1731004.08FU	k__Fungi;p__Basidiomycota;c__Agaricomycetes;o__Sebacinales;f__Sebacinaceae;g__Sebacina;s__Sebacina_sp	UCL8_007582
22_608	KF000596	Bistorta_vivipara	Germany	duplicate_of_EU668269||Germany	SH1731004.08FU	k__Fungi;p__Basidiomycota;c__Agaricomycetes;o__Sebacinales;f__Sebacinaceae;g__Sebacina;s__Sebacina_sp	UCL8_007582
22_609	KF000605	Bistorta_vivipara	Germany	duplicate_of_EU668269||Germany	SH1731004.08FU	k__Fungi;p__Basidiomycota;c__Agaricomycetes;o__Sebacinales;f__Sebacinaceae;g__Sebacina;s__Sebacina_sp	UCL8_007582
22_610	KF000609	Bistorta_vivipara	Germany	duplicate_of_EU668269||Germany	SH1731004.08FU	k__Fungi;p__Basidiomycota;c__Agaricomycetes;o__Sebacinales;f__Sebacinaceae;g__Sebacina;s__Sebacina_sp	UCL8_007582
22_596	HQ154309	Pinus_mugo	Germany	present_in	SH1731004.08FU	k__Fungi;p__Basidiomycota;c__Agaricomycetes;o__Sebacinales;f__Sebacinaceae;g__Sebacina;s__Sebacina_sp	UCL8_007582
22_597	HQ154326	Equisetum_sylvaticum	Germany	present_in	SH1731004.08FU	k__Fungi;p__Basidiomycota;c__Agaricomycetes;o__Sebacinales;f__Sebacinaceae;g__Sebacina;s__Sebacina_sp	UCL8_007582
22_646	KF000489	Bistorta_vivipara	Germany	present_in	SH1731051.08FU	k__Fungi;p__Basidiomycota;c__Agaricomycetes;o__Sebacinales;f__Sebacinaceae;g__Sebacina;s__Sebacina_sp	UCL8_007582
22_652	KF000487	Bistorta_vivipara	Germany	present_in	SH1731051.08FU	k__Fungi;p__Basidiomycota;c__Agaricomycetes;o__Sebacinales;f__Sebacinaceae;g__Sebacina;s__Sebacina_sp	UCL8_007582
22_653	KF000488	Bistorta_vivipara	Germany	duplicate_of_KF000487|Bistorta_vivipara|Germany	SH1731051.08FU	k__Fungi;p__Basidiomycota;c__Agaricomycetes;o__Sebacinales;f__Sebacinaceae;g__Sebacina;s__Sebacina_sp	UCL8_007582
22_654	KF000490	Bistorta_vivipara	Germany	duplicate_of_KF000487|Bistorta_vivipara|Germany	SH1731051.08FU	k__Fungi;p__Basidiomycota;c__Agaricomycetes;o__Sebacinales;f__Sebacinaceae;g__Sebacina;s__Sebacina_sp	UCL8_007582
22_655	KF000491	Bistorta_vivipara	Germany	duplicate_of_KF000487|Bistorta_vivipara|Germany	SH1731051.08FU	k__Fungi;p__Basidiomycota;c__Agaricomycetes;o__Sebacinales;f__Sebacinaceae;g__Sebacina;s__Sebacina_sp	UCL8_007582
22_656	KF000492	Bistorta_vivipara	Germany	present_in	SH1731051.08FU	k__Fungi;p__Basidiomycota;c__Agaricomycetes;o__Sebacinales;f__Sebacinaceae;g__Sebacina;s__Sebacina_sp	UCL8_007582
22_667	KC986237	Bistorta_vivipara	Germany	present_in	SH1731015.08FU	k__Fungi;p__Basidiomycota;c__Agaricomycetes;o__Sebacinales;f__Sebacinaceae;g__Sebacina;s__Sebacina_sp	UCL8_007582
22_669	KF000593	Bistorta_vivipara	Germany	present_in	SH1731015.08FU	k__Fungi;p__Basidiomycota;c__Agaricomycetes;o__Sebacinales;f__Sebacinaceae;g__Sebacina;s__Sebacina_sp	UCL8_007582
22_672	EU668267	Fagus_sylvatica	Germany	present_in	SH1731015.08FU	k__Fungi;p__Basidiomycota;c__Agaricomycetes;o__Sebacinales;f__Sebacinaceae;g__Sebacina;s__Sebacina_sp	UCL8_007582
22_671	KC986240	Bistorta_vivipara	Germany	present_in	SH1731015.08FU	k__Fungi;p__Basidiomycota;c__Agaricomycetes;o__Sebacinales;f__Sebacinaceae;g__Sebacina;s__Sebacina_sp	UCL8_007582
22_678	KC986238	Bistorta_vivipara	Germany	present_in	SH1731015.08FU	k__Fungi;p__Basidiomycota;c__Agaricomycetes;o__Sebacinales;f__Sebacinaceae;g__Sebacina;s__Sebacina_sp	UCL8_007582
22_679	KC986239	Bistorta_vivipara	Germany	present_in	SH1731015.08FU	k__Fungi;p__Basidiomycota;c__Agaricomycetes;o__Sebacinales;f__Sebacinaceae;g__Sebacina;s__Sebacina_sp	UCL8_007582
22_682	HQ154286	Gentiana_asclepiadea	Germany	present_in	SH1731015.08FU	k__Fungi;p__Basidiomycota;c__Agaricomycetes;o__Sebacinales;f__Sebacinaceae;g__Sebacina;s__Sebacina_sp	UCL8_007582
22_695	HQ154376	Bistorta_vivipara	Germany	present_in	SH1731074.08FU	k__Fungi;p__Basidiomycota;c__Agaricomycetes;o__Sebacinales;f__Sebacinaceae;g__Sebacina;s__Sebacina_sp	UCL8_007582
22_696	HQ154377	Bistorta_vivipara	Germany	duplicate_of_HQ154376|Bistorta_vivipara|Germany	SH1731074.08FU	k__Fungi;p__Basidiomycota;c__Agaricomycetes;o__Sebacinales;f__Sebacinaceae;g__Sebacina;s__Sebacina_sp	UCL8_007582
22_771	KF000666	Bistorta_vivipara	Germany	present_in	SH1731010.08FU	k__Fungi;p__Basidiomycota;c__Agaricomycetes;o__Sebacinales;f__Sebacinaceae;g__Sebacina;s__Sebacina_sp	UCL8_007582
22_776	EF372401	Orthilia_secunda	Germany	present_in	SH1731010.08FU	k__Fungi;p__Basidiomycota;c__Agaricomycetes;o__Sebacinales;f__Sebacinaceae;g__Sebacina;s__Sebacina_sp	UCL8_007582
22_778	HQ154314	Acer_pseudoplatanus	Germany	duplicate_of_EU668220|Fagus_sylvatica|United_Kingdom	SH1731010.08FU	k__Fungi;p__Basidiomycota;c__Agaricomycetes;o__Sebacinales;f__Sebacinaceae;g__Sebacina;s__Sebacina_sp	UCL8_007582
22_779	KF000524	Bistorta_vivipara	Germany	duplicate_of_EU668220|Fagus_sylvatica|United_Kingdom	SH1731010.08FU	k__Fungi;p__Basidiomycota;c__Agaricomycetes;o__Sebacinales;f__Sebacinaceae;g__Sebacina;s__Sebacina_sp	UCL8_007582
22_780	KF000527	Bistorta_vivipara	Germany	duplicate_of_EU668220|Fagus_sylvatica|United_Kingdom	SH1731010.08FU	k__Fungi;p__Basidiomycota;c__Agaricomycetes;o__Sebacinales;f__Sebacinaceae;g__Sebacina;s__Sebacina_sp	UCL8_007582
22_781	KF000528	Bistorta_vivipara	Germany	duplicate_of_EU668220|Fagus_sylvatica|United_Kingdom	SH1731010.08FU	k__Fungi;p__Basidiomycota;c__Agaricomycetes;o__Sebacinales;f__Sebacinaceae;g__Sebacina;s__Sebacina_sp	UCL8_007582
22_783	KF000570	Bistorta_vivipara	Germany	duplicate_of_EU668220|Fagus_sylvatica|United_Kingdom	SH1731010.08FU	k__Fungi;p__Basidiomycota;c__Agaricomycetes;o__Sebacinales;f__Sebacinaceae;g__Sebacina;s__Sebacina_sp	UCL8_007582
22_782	KF000529	Bistorta_vivipara	Germany	present_in	SH1731010.08FU	k__Fungi;p__Basidiomycota;c__Agaricomycetes;o__Sebacinales;f__Sebacinaceae;g__Sebacina;s__Sebacina_sp	UCL8_007582
22_785	KF000601	Bistorta_vivipara	Germany	duplicate_of_KF000529|Bistorta_vivipara|Germany	SH1731010.08FU	k__Fungi;p__Basidiomycota;c__Agaricomycetes;o__Sebacinales;f__Sebacinaceae;g__Sebacina;s__Sebacina_sp	UCL8_007582
22_784	KF000600	Bistorta_vivipara	Germany	present_in	SH1731010.08FU	k__Fungi;p__Basidiomycota;c__Agaricomycetes;o__Sebacinales;f__Sebacinaceae;g__Sebacina;s__Sebacina_sp	UCL8_007582
22_786	KF000602	Bistorta_vivipara	Germany	present_in	SH1731010.08FU	k__Fungi;p__Basidiomycota;c__Agaricomycetes;o__Sebacinales;f__Sebacinaceae;g__Sebacina;s__Sebacina_sp	UCL8_007582
22_801	KF000656	Bistorta_vivipara	Germany	present_in	SH1731010.08FU	k__Fungi;p__Basidiomycota;c__Agaricomycetes;o__Sebacinales;f__Sebacinaceae;g__Sebacina;s__Sebacina_sp	UCL8_007582
22_835	HQ154233	Equisetum_sylvaticum	Germany	present_in	SH1731033.08FU	k__Fungi;p__Basidiomycota;c__Agaricomycetes;o__Sebacinales;f__Sebacinaceae;g__Sebacina;s__Sebacina_sp	UCL8_007582
22_839	JQ665556		Germany	present_in	SH1731033.08FU	k__Fungi;p__Basidiomycota;c__Agaricomycetes;o__Sebacinales;f__Sebacinaceae;g__Sebacina;s__Sebacina_sp	UCL8_007582
22_840	JQ665557		Germany	duplicate_of_JQ665556||Germany	SH1731033.08FU	k__Fungi;p__Basidiomycota;c__Agaricomycetes;o__Sebacinales;f__Sebacinaceae;g__Sebacina;s__Sebacina_sp	UCL8_007582
22_841	JQ665558		Germany	duplicate_of_JQ665556||Germany	SH1731033.08FU	k__Fungi;p__Basidiomycota;c__Agaricomycetes;o__Sebacinales;f__Sebacinaceae;g__Sebacina;s__Sebacina_sp	UCL8_007582
22_842	KF000610	Bistorta_vivipara	Germany	duplicate_of_JQ665556||Germany	SH1731033.08FU	k__Fungi;p__Basidiomycota;c__Agaricomycetes;o__Sebacinales;f__Sebacinaceae;g__Sebacina;s__Sebacina_sp	UCL8_007582
22_845	KF000641	Bistorta_vivipara	Germany	present_in	SH1731021.08FU	k__Fungi;p__Basidiomycota;c__Agaricomycetes;o__Sebacinales;f__Sebacinaceae;g__Sebacina;s__Sebacina_sp	UCL8_007582
22_847	KF000652	Bistorta_vivipara	Germany	present_in	SH1731021.08FU	k__Fungi;p__Basidiomycota;c__Agaricomycetes;o__Sebacinales;f__Sebacinaceae;g__Sebacina;s__Sebacina_sp	UCL8_007582
22_849	KF000594	Bistorta_vivipara	Germany	present_in	SH1731021.08FU	k__Fungi;p__Basidiomycota;c__Agaricomycetes;o__Sebacinales;f__Sebacinaceae;g__Sebacina;s__Sebacina_sp	UCL8_007582
22_848	KF000680	Bistorta_vivipara	Germany	present_in	SH1731021.08FU	k__Fungi;p__Basidiomycota;c__Agaricomycetes;o__Sebacinales;f__Sebacinaceae;g__Sebacina;s__Sebacina_sp	UCL8_007582
22_852	KF000536	Bistorta_vivipara	Germany	present_in	SH1731021.08FU	k__Fungi;p__Basidiomycota;c__Agaricomycetes;o__Sebacinales;f__Sebacinaceae;g__Sebacina;s__Sebacina_sp	UCL8_007582
22_853	KF000537	Bistorta_vivipara	Germany	duplicate_of_KF000536|Bistorta_vivipara|Germany	SH1731021.08FU	k__Fungi;p__Basidiomycota;c__Agaricomycetes;o__Sebacinales;f__Sebacinaceae;g__Sebacina;s__Sebacina_sp	UCL8_007582
22_854	KF000543	Bistorta_vivipara	Germany	duplicate_of_KF000536|Bistorta_vivipara|Germany	SH1731021.08FU	k__Fungi;p__Basidiomycota;c__Agaricomycetes;o__Sebacinales;f__Sebacinaceae;g__Sebacina;s__Sebacina_sp	UCL8_007582
22_855	KF000673	Bistorta_vivipara	Germany	duplicate_of_KF000536|Bistorta_vivipara|Germany	SH1731021.08FU	k__Fungi;p__Basidiomycota;c__Agaricomycetes;o__Sebacinales;f__Sebacinaceae;g__Sebacina;s__Sebacina_sp	UCL8_007582
22_923	HQ154276	Luzula_sylvatica	Germany	present_in	SH1682204.08FU	k__Fungi;p__Basidiomycota;c__Agaricomycetes;o__Sebacinales;f__Sebacinaceae;g__Sebacina;s__Sebacina_sp	UCL8_003407
22_924	HQ154284	Astrantia_major	Germany	duplicate_of_HQ154276|Luzula_sylvatica|Germany	SH1682204.08FU	k__Fungi;p__Basidiomycota;c__Agaricomycetes;o__Sebacinales;f__Sebacinaceae;g__Sebacina;s__Sebacina_sp	UCL8_003407
22_925	HQ154290	Aposeris_foetida	Germany	duplicate_of_HQ154276|Luzula_sylvatica|Germany	SH1682204.08FU	k__Fungi;p__Basidiomycota;c__Agaricomycetes;o__Sebacinales;f__Sebacinaceae;g__Sebacina;s__Sebacina_sp	UCL8_003407
22_926	KF000469	Bistorta_vivipara	Germany	present_in	SH1682204.08FU	k__Fungi;p__Basidiomycota;c__Agaricomycetes;o__Sebacinales;f__Sebacinaceae;g__Sebacina;s__Sebacina_sp	UCL8_003407
22_927	KF000470	Bistorta_vivipara	Germany	duplicate_of_KF000469|Bistorta_vivipara|Germany	SH1682204.08FU	k__Fungi;p__Basidiomycota;c__Agaricomycetes;o__Sebacinales;f__Sebacinaceae;g__Sebacina;s__Sebacina_sp	UCL8_003407
22_929	KF000472	Bistorta_vivipara	Germany	duplicate_of_KF000469|Bistorta_vivipara|Germany	SH1682204.08FU	k__Fungi;p__Basidiomycota;c__Agaricomycetes;o__Sebacinales;f__Sebacinaceae;g__Sebacina;s__Sebacina_sp	UCL8_003407
22_930	KF000473	Bistorta_vivipara	Germany	duplicate_of_KF000469|Bistorta_vivipara|Germany	SH1682204.08FU	k__Fungi;p__Basidiomycota;c__Agaricomycetes;o__Sebacinales;f__Sebacinaceae;g__Sebacina;s__Sebacina_sp	UCL8_003407
22_931	KF000477	Bistorta_vivipara	Germany	duplicate_of_KF000469|Bistorta_vivipara|Germany	SH1682204.08FU	k__Fungi;p__Basidiomycota;c__Agaricomycetes;o__Sebacinales;f__Sebacinaceae;g__Sebacina;s__Sebacina_sp	UCL8_003407
22_932	KF000478	Bistorta_vivipara	Germany	duplicate_of_KF000469|Bistorta_vivipara|Germany	SH1682204.08FU	k__Fungi;p__Basidiomycota;c__Agaricomycetes;o__Sebacinales;f__Sebacinaceae;g__Sebacina;s__Sebacina_sp	UCL8_003407
22_928	KF000471	Bistorta_vivipara	Germany	present_in	SH1682204.08FU	k__Fungi;p__Basidiomycota;c__Agaricomycetes;o__Sebacinales;f__Sebacinaceae;g__Sebacina;s__Sebacina_sp	UCL8_003407
22_934	JX561236		Germany	present_in	SH1682199.08FU	k__Fungi;p__Basidiomycota;c__Agaricomycetes;o__Sebacinales;f__Sebacinaceae;g__Sebacina;s__Sebacina_sp	UCL8_003407
22_938	KF000551	Bistorta_vivipara	Germany	present_in	SH1731026.08FU	k__Fungi;p__Basidiomycota;c__Agaricomycetes;o__Sebacinales;f__Sebacinaceae;g__Sebacina;s__Sebacina_sp	UCL8_007582
22_940	KF000559	Bistorta_vivipara	Germany	present_in	SH1731026.08FU	k__Fungi;p__Basidiomycota;c__Agaricomycetes;o__Sebacinales;f__Sebacinaceae;g__Sebacina;s__Sebacina_sp	UCL8_007582
22_947	HQ154397	Daphne_striata	Germany	present_in	SH1731026.08FU	k__Fungi;p__Basidiomycota;c__Agaricomycetes;o__Sebacinales;f__Sebacinaceae;g__Sebacina;s__Sebacina_sp	UCL8_007582
22_948	HQ154403	Pinguicula_alpina	Germany	present_in	SH1731026.08FU	k__Fungi;p__Basidiomycota;c__Agaricomycetes;o__Sebacinales;f__Sebacinaceae;g__Sebacina;s__Sebacina_sp	UCL8_007582
22_962	JQ665533		Germany	present_in	SH1800252.08FU	k__Fungi;p__Basidiomycota;c__Agaricomycetes;o__Sebacinales;f__Sebacinaceae;g__Sebacina;s__Sebacina_sp	UCL8_010859
22_1007	KC986256	Bistorta_vivipara	Germany	present_in	SH1672832.08FU	k__Fungi;p__Basidiomycota;c__Agaricomycetes;o__Sebacinales;f__Sebacinaceae;g__Sebacina;s__Sebacina_sp	UCL8_001587
22_1027	KF000675	Bistorta_vivipara	Germany	present_in	SH1682250.08FU	k__Fungi;p__Basidiomycota;c__Agaricomycetes;o__Sebacinales;f__Sebacinaceae;g__Sebacina;s__Sebacina_sp	UCL8_003407
22_1034	HQ154374	Bistorta_vivipara	Germany	present_in	SH1731271.08FU	k__Fungi;p__Basidiomycota;c__Agaricomycetes;o__Sebacinales;f__Sebacinaceae;g__Sebacina;s__Sebacina_sp	UCL8_007582
22_1043	HQ154405	Globularia_nudicaulis	Germany	present_in	SH1731132.08FU	k__Fungi;p__Basidiomycota;c__Agaricomycetes;o__Sebacinales;f__Sebacinaceae;g__Sebacina;s__Sebacina_sp	UCL8_007582
22_1054	GQ219876		Germany	present_in	SH1682259.08FU	k__Fungi;p__Basidiomycota;c__Agaricomycetes;o__Sebacinales;f__Sebacinaceae;g__Sebacina;s__Sebacina_sp	UCL8_003407
22_1058	HQ154350	Astrantia_major	Germany	present_in	SH1682213.08FU	k__Fungi;p__Basidiomycota;c__Agaricomycetes;o__Sebacinales;f__Sebacinaceae;g__Sebacina;s__Sebacina_sp	UCL8_003407
22_1060	KF000539	Bistorta_vivipara	Germany	present_in	SH1682213.08FU	k__Fungi;p__Basidiomycota;c__Agaricomycetes;o__Sebacinales;f__Sebacinaceae;g__Sebacina;s__Sebacina_sp	UCL8_003407
22_1059	HQ154375	Bistorta_vivipara	Germany	present_in	SH1682213.08FU	k__Fungi;p__Basidiomycota;c__Agaricomycetes;o__Sebacinales;f__Sebacinaceae;g__Sebacina;s__Sebacina_sp	UCL8_003407
22_1090	GQ219866		Germany	present_in	SH1800269.08FU	k__Fungi;p__Basidiomycota;c__Agaricomycetes;o__Sebacinales;f__Sebacinaceae;g__Sebacina;s__Sebacina_sp	UCL8_010859
22_1091	GQ219874		Germany	present_in	SH1682214.08FU	k__Fungi;p__Basidiomycota;c__Agaricomycetes;o__Sebacinales;f__Sebacinaceae;g__Sebacina;s__Sebacina_sp	UCL8_003407
22_1092	HQ154331	Viola_reichenbachiana	Germany	duplicate_of_GQ219874||Germany	SH1682214.08FU	k__Fungi;p__Basidiomycota;c__Agaricomycetes;o__Sebacinales;f__Sebacinaceae;g__Sebacina;s__Sebacina_sp	UCL8_003407
22_1097	HQ154410	Lamium	Germany	present_in	SH1682267.08FU	k__Fungi;p__Basidiomycota;c__Agaricomycetes;o__Sebacinales;f__Sebacinaceae;g__Sebacina;s__Sebacina_sp	UCL8_003407
22_1093	KC986246	Bistorta_vivipara	Germany	present_in	SH1682214.08FU	k__Fungi;p__Basidiomycota;c__Agaricomycetes;o__Sebacinales;f__Sebacinaceae;g__Sebacina;s__Sebacina_sp	UCL8_003407
22_1094	KC986247	Bistorta_vivipara	Germany	duplicate_of_KC986246|Bistorta_vivipara|Germany	SH1682214.08FU	k__Fungi;p__Basidiomycota;c__Agaricomycetes;o__Sebacinales;f__Sebacinaceae;g__Sebacina;s__Sebacina_sp	UCL8_003407
22_1095	KC986248	Bistorta_vivipara	Germany	duplicate_of_KC986246|Bistorta_vivipara|Germany	SH1682214.08FU	k__Fungi;p__Basidiomycota;c__Agaricomycetes;o__Sebacinales;f__Sebacinaceae;g__Sebacina;s__Sebacina_sp	UCL8_003407
22_1096	KC986249	Bistorta_vivipara	Germany	duplicate_of_KC986246|Bistorta_vivipara|Germany	SH1682214.08FU	k__Fungi;p__Basidiomycota;c__Agaricomycetes;o__Sebacinales;f__Sebacinaceae;g__Sebacina;s__Sebacina_sp	UCL8_003407
22_1135	HQ154355	Acer_pseudoplatanus	Germany	present_in	SH1731324.08FU	k__Fungi;p__Basidiomycota;c__Agaricomycetes;o__Sebacinales;f__Sebacinaceae;g__Sebacina;s__Sebacina_sp	UCL8_007582
22_1136	HQ154415	Viola_reichenbachiana	Germany	present_in	SH1731323.08FU	k__Fungi;p__Basidiomycota;c__Agaricomycetes;o__Sebacinales;f__Sebacinaceae;g__Sebacina;s__Sebacina_sp	UCL8_007582
22_1148	HQ154352	Acer_platanoides	Germany	present_in	SH1731334.08FU	k__Fungi;p__Basidiomycota;c__Agaricomycetes;o__Sebacinales;f__Sebacinaceae;g__Sebacina;s__Sebacina_sp	UCL8_007582
22_2	Sebacina__KM289191	Pinus_wallichiana	India	present_in	SH1731006.08FU	k__Fungi;p__Basidiomycota;c__Agaricomycetes;o__Sebacinales;f__Sebacinaceae;g__Sebacina;s__Sebacina_sp	UCL8_007582
22_511	Sebacina__UDB018788__TU119059		India	present_in	SH1682217.08FU	k__Fungi;p__Basidiomycota;c__Agaricomycetes;o__Sebacinales;f__Sebacinaceae;g__Sebacina;s__Sebacina_sp	UCL8_003407
22_30	FR852334	Fagales	Iran,_Islamic_Republic_of	present_in	SH1731005.08FU	k__Fungi;p__Basidiomycota;c__Agaricomycetes;o__Sebacinales;f__Sebacinaceae;g__Sebacina;s__Sebacina_sp	UCL8_007582
22_38	Sebacina__UDB005394__sample	Fagaceae	Iran,_Islamic_Republic_of	duplicate_of_FR852334|Fagales|Iran,_Islamic_Republic_of	SH1731005.08FU	k__Fungi;p__Basidiomycota;c__Agaricomycetes;o__Sebacinales;f__Sebacinaceae;g__Sebacina;s__Sebacina_sp	UCL8_007582
22_39	Sebacina__UDB005403__sample	Tilia	Iran,_Islamic_Republic_of	duplicate_of_FR852334|Fagales|Iran,_Islamic_Republic_of	SH1731005.08FU	k__Fungi;p__Basidiomycota;c__Agaricomycetes;o__Sebacinales;f__Sebacinaceae;g__Sebacina;s__Sebacina_sp	UCL8_007582
22_40	Sebacina__UDB005406__sample	Fagaceae	Iran,_Islamic_Republic_of	duplicate_of_FR852334|Fagales|Iran,_Islamic_Republic_of	SH1731005.08FU	k__Fungi;p__Basidiomycota;c__Agaricomycetes;o__Sebacinales;f__Sebacinaceae;g__Sebacina;s__Sebacina_sp	UCL8_007582
22_42	Sebacina__UDB005415__sample	Fagaceae	Iran,_Islamic_Republic_of	duplicate_of_FR852334|Fagales|Iran,_Islamic_Republic_of	SH1731005.08FU	k__Fungi;p__Basidiomycota;c__Agaricomycetes;o__Sebacinales;f__Sebacinaceae;g__Sebacina;s__Sebacina_sp	UCL8_007582
22_43	Sebacina__UDB005418__sample	Fagaceae	Iran,_Islamic_Republic_of	duplicate_of_FR852334|Fagales|Iran,_Islamic_Republic_of	SH1731005.08FU	k__Fungi;p__Basidiomycota;c__Agaricomycetes;o__Sebacinales;f__Sebacinaceae;g__Sebacina;s__Sebacina_sp	UCL8_007582
22_44	Sebacina__UDB005419__sample	Fagaceae	Iran,_Islamic_Republic_of	duplicate_of_FR852334|Fagales|Iran,_Islamic_Republic_of	SH1731005.08FU	k__Fungi;p__Basidiomycota;c__Agaricomycetes;o__Sebacinales;f__Sebacinaceae;g__Sebacina;s__Sebacina_sp	UCL8_007582
22_46	Sebacina__UDB005817__sample	Fagaceae	Iran,_Islamic_Republic_of	duplicate_of_FR852334|Fagales|Iran,_Islamic_Republic_of	SH1731005.08FU	k__Fungi;p__Basidiomycota;c__Agaricomycetes;o__Sebacinales;f__Sebacinaceae;g__Sebacina;s__Sebacina_sp	UCL8_007582
22_47	Sebacina__UDB005833__sample	Fagaceae	Iran,_Islamic_Republic_of	duplicate_of_FR852334|Fagales|Iran,_Islamic_Republic_of	SH1731005.08FU	k__Fungi;p__Basidiomycota;c__Agaricomycetes;o__Sebacinales;f__Sebacinaceae;g__Sebacina;s__Sebacina_sp	UCL8_007582
22_49	Sebacina__UDB005416__sample	Fagaceae	Iran,_Islamic_Republic_of	present_in	SH1731005.08FU	k__Fungi;p__Basidiomycota;c__Agaricomycetes;o__Sebacinales;f__Sebacinaceae;g__Sebacina;s__Sebacina_sp	UCL8_007582
22_114	HE687106		Iran,_Islamic_Republic_of	present_in	SH1731018.08FU	k__Fungi;p__Basidiomycota;c__Agaricomycetes;o__Sebacinales;f__Sebacinaceae;g__Sebacina;s__Sebacina_sp	UCL8_007582
22_322	Sebacina__UDB005584__sample	Fagaceae	Iran,_Islamic_Republic_of	present_in	SH1731087.08FU	k__Fungi;p__Basidiomycota;c__Agaricomycetes;o__Sebacinales;f__Sebacinaceae;g__Sebacina;s__Sebacina_sp	UCL8_007582
22_325	HE687117		Iran,_Islamic_Republic_of	present_in	SH1731087.08FU	k__Fungi;p__Basidiomycota;c__Agaricomycetes;o__Sebacinales;f__Sebacinaceae;g__Sebacina;s__Sebacina_sp	UCL8_007582
22_399	HE687108		Iran,_Islamic_Republic_of	present_in	SH1731002.08FU	k__Fungi;p__Basidiomycota;c__Agaricomycetes;o__Sebacinales;f__Sebacinaceae;g__Sebacina;s__Sebacina_sp	UCL8_007582
22_405	FR852339	Fagales	Iran,_Islamic_Republic_of	present_in	SH1731002.08FU	k__Fungi;p__Basidiomycota;c__Agaricomycetes;o__Sebacinales;f__Sebacinaceae;g__Sebacina;s__Sebacina_sp	UCL8_007582
22_429	Sebacina__UDB005543__sample	Fagaceae	Iran,_Islamic_Republic_of	present_in	SH1731002.08FU	k__Fungi;p__Basidiomycota;c__Agaricomycetes;o__Sebacinales;f__Sebacinaceae;g__Sebacina;s__Sebacina_sp	UCL8_007582
22_499	Sebacina__UDB005444__sample	Fagaceae	Iran,_Islamic_Republic_of	present_in	SH1731169.08FU	k__Fungi;p__Basidiomycota;c__Agaricomycetes;o__Sebacinales;f__Sebacinaceae;g__Sebacina;s__Sebacina_sp	UCL8_007582
22_565	HE687110		Iran,_Islamic_Republic_of	present_in	SH1672837.08FU	k__Fungi;p__Basidiomycota;c__Agaricomycetes;o__Sebacinales;f__Sebacinaceae;g__Sebacina;s__Sebacina_sp	UCL8_001587
22_569	FR852350	Fagales	Iran,_Islamic_Republic_of	present_in	SH1672837.08FU	k__Fungi;p__Basidiomycota;c__Agaricomycetes;o__Sebacinales;f__Sebacinaceae;g__Sebacina;s__Sebacina_sp	UCL8_001587
22_568	Sebacina__UDB005340__sample	Tilia	Iran,_Islamic_Republic_of	present_in	SH1672837.08FU	k__Fungi;p__Basidiomycota;c__Agaricomycetes;o__Sebacinales;f__Sebacinaceae;g__Sebacina;s__Sebacina_sp	UCL8_001587
22_648	Sebacina__UDB005787__sample	Fagaceae	Iran,_Islamic_Republic_of	present_in	SH1731077.08FU	k__Fungi;p__Basidiomycota;c__Agaricomycetes;o__Sebacinales;f__Sebacinaceae;g__Sebacina;s__Sebacina_sp	UCL8_007582
22_698	Sebacina__UDB017452		Iran,_Islamic_Republic_of	present_in	SH1682203.08FU	k__Fungi;p__Basidiomycota;c__Agaricomycetes;o__Sebacinales;f__Sebacinaceae;g__Sebacina;s__Sebacina_sp	UCL8_003407
22_705	Sebacina__UDB017484		Iran,_Islamic_Republic_of	present_in	SH1731185.08FU	k__Fungi;p__Basidiomycota;c__Agaricomycetes;o__Sebacinales;f__Sebacinaceae;g__Sebacina;s__Sebacina_sp	UCL8_007582
22_761	Sebacina__UDB005770__sample	Fagaceae	Iran,_Islamic_Republic_of	present_in	SH1731346.08FU	k__Fungi;p__Basidiomycota;c__Agaricomycetes;o__Sebacinales;f__Sebacinaceae;g__Sebacina;s__Sebacina_sp	UCL8_007582
22_823	Sebacina__UDB005730__sample	Fagaceae	Iran,_Islamic_Republic_of	present_in	SH1731033.08FU	k__Fungi;p__Basidiomycota;c__Agaricomycetes;o__Sebacinales;f__Sebacinaceae;g__Sebacina;s__Sebacina_sp	UCL8_007582
22_832	FR852348	Fagales	Iran,_Islamic_Republic_of	present_in	SH1731033.08FU	k__Fungi;p__Basidiomycota;c__Agaricomycetes;o__Sebacinales;f__Sebacinaceae;g__Sebacina;s__Sebacina_sp	UCL8_007582
22_901	FR852357	Fagales	Iran,_Islamic_Republic_of	present_in	SH1731029.08FU	k__Fungi;p__Basidiomycota;c__Agaricomycetes;o__Sebacinales;f__Sebacinaceae;g__Sebacina;s__Sebacina_sp	UCL8_007582
22_1000	Sebacina__UDB017501		Iran,_Islamic_Republic_of	present_in	SH1731238.08FU	k__Fungi;p__Basidiomycota;c__Agaricomycetes;o__Sebacinales;f__Sebacinaceae;g__Sebacina;s__Sebacina_sp	UCL8_007582
22_1002	Sebacina__UDB005773__sample	Fagaceae	Iran,_Islamic_Republic_of	present_in	SH1731124.08FU	k__Fungi;p__Basidiomycota;c__Agaricomycetes;o__Sebacinales;f__Sebacinaceae;g__Sebacina;s__Sebacina_sp	UCL8_007582
22_1003	Sebacina__UDB005774__sample	Fagaceae	Iran,_Islamic_Republic_of	present_in	SH1731124.08FU	k__Fungi;p__Basidiomycota;c__Agaricomycetes;o__Sebacinales;f__Sebacinaceae;g__Sebacina;s__Sebacina_sp	UCL8_007582
22_1010	FR852358	Fagales	Iran,_Islamic_Republic_of	present_in	SH1731126.08FU	k__Fungi;p__Basidiomycota;c__Agaricomycetes;o__Sebacinales;f__Sebacinaceae;g__Sebacina;s__Sebacina_sp	UCL8_007582
22_1023	FR852360	Fagales	Iran,_Islamic_Republic_of	present_in	SH1682202.08FU	k__Fungi;p__Basidiomycota;c__Agaricomycetes;o__Sebacinales;f__Sebacinaceae;g__Sebacina;s__Sebacina_sp	UCL8_003407
22_1024	FR852364	Fagales	Iran,_Islamic_Republic_of	present_in	SH1731256.08FU	k__Fungi;p__Basidiomycota;c__Agaricomycetes;o__Sebacinales;f__Sebacinaceae;g__Sebacina;s__Sebacina_sp	UCL8_007582
22_1031	FR852366	Fagales	Iran,_Islamic_Republic_of	present_in	SH1731083.08FU	k__Fungi;p__Basidiomycota;c__Agaricomycetes;o__Sebacinales;f__Sebacinaceae;g__Sebacina;s__Sebacina_sp	UCL8_007582
22_1033	Sebacina__UDB005659__sample	Betula	Iran,_Islamic_Republic_of	present_in	SH1731265.08FU	k__Fungi;p__Basidiomycota;c__Agaricomycetes;o__Sebacinales;f__Sebacinaceae;g__Sebacina;s__Sebacina_sp	UCL8_007582
22_1040	Sebacina__UDB005330__sample	Fagaceae	Iran,_Islamic_Republic_of	present_in	SH1682227.08FU	k__Fungi;p__Basidiomycota;c__Agaricomycetes;o__Sebacinales;f__Sebacinaceae;g__Sebacina;s__Sebacina_sp	UCL8_003407
22_1006	HQ330995	Orchis_italica	Israel	present_in	SH1672832.08FU	k__Fungi;p__Basidiomycota;c__Agaricomycetes;o__Sebacinales;f__Sebacinaceae;g__Sebacina;s__Sebacina_sp	UCL8_001587
22_309	Sebacina__KT122778	Cephalanthera_damasonium	Italy	present_in	SH1731087.08FU	k__Fungi;p__Basidiomycota;c__Agaricomycetes;o__Sebacinales;f__Sebacinaceae;g__Sebacina;s__Sebacina_sp	UCL8_007582
22_329	FJ688114	orchid	Italy	present_in	SH1731087.08FU	k__Fungi;p__Basidiomycota;c__Agaricomycetes;o__Sebacinales;f__Sebacinaceae;g__Sebacina;s__Sebacina_sp	UCL8_007582
22_335	JX625314		Italy	present_in	SH1731087.08FU	k__Fungi;p__Basidiomycota;c__Agaricomycetes;o__Sebacinales;f__Sebacinaceae;g__Sebacina;s__Sebacina_sp	UCL8_007582
22_362	Sebacina__UDB010006__sample	Alnus_incana	Italy	duplicate_of_Sebacina__JN198112||Unspecified	SH1731101.08FU	k__Fungi;p__Basidiomycota;c__Agaricomycetes;o__Sebacinales;f__Sebacinaceae;g__Sebacina;s__Sebacina_sp	UCL8_007582
22_382	HF565089	Quercus_ruber	Italy	present_in	SH1682200.08FU	k__Fungi;p__Basidiomycota;c__Agaricomycetes;o__Sebacinales;f__Sebacinaceae;g__Sebacina;s__Sebacina_sp	UCL8_003407
22_386	GU256183	Quercus_suber	Italy	present_in	SH1682200.08FU	k__Fungi;p__Basidiomycota;c__Agaricomycetes;o__Sebacinales;f__Sebacinaceae;g__Sebacina;s__Sebacina_sp	UCL8_003407
22_394	HF565087	Quercus_ruber	Italy	present_in	SH1682199.08FU	k__Fungi;p__Basidiomycota;c__Agaricomycetes;o__Sebacinales;f__Sebacinaceae;g__Sebacina;s__Sebacina_sp	UCL8_003407
22_425	JX625322		Italy	present_in	SH1731002.08FU	k__Fungi;p__Basidiomycota;c__Agaricomycetes;o__Sebacinales;f__Sebacinaceae;g__Sebacina;s__Sebacina_sp	UCL8_007582
22_454	AJ879655	Angiospermae	Italy	present_in	SH1672829.08FU	k__Fungi;p__Basidiomycota;c__Agaricomycetes;o__Sebacinales;f__Sebacinaceae;g__Sebacina;s__Sebacina_sp	UCL8_001587
22_566	EU444538	Fagus_sylvatica	Italy	present_in	SH1672831.08FU	k__Fungi;p__Basidiomycota;c__Agaricomycetes;o__Sebacinales;f__Sebacinaceae;g__Sebacina;s__Sebacina_sp	UCL8_001587
22_583	EU444543	Fagus_sylvatica	Italy	present_in	SH1731004.08FU	k__Fungi;p__Basidiomycota;c__Agaricomycetes;o__Sebacinales;f__Sebacinaceae;g__Sebacina;s__Sebacina_sp	UCL8_007582
22_650	JX625325		Italy	present_in	SH1731077.08FU	k__Fungi;p__Basidiomycota;c__Agaricomycetes;o__Sebacinales;f__Sebacinaceae;g__Sebacina;s__Sebacina_sp	UCL8_007582
22_722	HF565088	Quercus_ruber	Italy	present_in	SH1731020.08FU	k__Fungi;p__Basidiomycota;c__Agaricomycetes;o__Sebacinales;f__Sebacinaceae;g__Sebacina;s__Sebacina_sp	UCL8_007582
22_772	JX625327		Italy	present_in	SH1731010.08FU	k__Fungi;p__Basidiomycota;c__Agaricomycetes;o__Sebacinales;f__Sebacinaceae;g__Sebacina;s__Sebacina_sp	UCL8_007582
22_850	FJ210755		Italy	present_in	SH1731021.08FU	k__Fungi;p__Basidiomycota;c__Agaricomycetes;o__Sebacinales;f__Sebacinaceae;g__Sebacina;s__Sebacina_sp	UCL8_007582
22_1055	JX625326		Italy	present_in	SH1731070.08FU	k__Fungi;p__Basidiomycota;c__Agaricomycetes;o__Sebacinales;f__Sebacinaceae;g__Sebacina;s__Sebacina_sp	UCL8_007582
22_356	Sebacina__AB506962__sample	Cymbidium_macrorhizon	Japan	present_in	SH1672884.08FU	k__Fungi;p__Basidiomycota;c__Agaricomycetes;o__Sebacinales;f__Sebacinaceae;g__Sebacina;s__Sebacina_sp	UCL8_001587
22_357	Sebacina__AB506982	Cymbidium_macrorhizon	Japan	present_in	SH1672852.08FU	k__Fungi;p__Basidiomycota;c__Agaricomycetes;o__Sebacinales;f__Sebacinaceae;g__Sebacina;s__Sebacina_sp	UCL8_001587
22_378	LC003271	Cephalanthera_falcata	Japan	present_in	SH1731073.08FU	k__Fungi;p__Basidiomycota;c__Agaricomycetes;o__Sebacinales;f__Sebacinaceae;g__Sebacina;s__Sebacina_sp	UCL8_007582
22_404	AB831807		Japan	present_in	SH1731002.08FU	k__Fungi;p__Basidiomycota;c__Agaricomycetes;o__Sebacinales;f__Sebacinaceae;g__Sebacina;s__Sebacina_sp	UCL8_007582
22_447	LC175163	Betula_sp.	Japan	present_in	SH1731002.08FU	k__Fungi;p__Basidiomycota;c__Agaricomycetes;o__Sebacinales;f__Sebacinaceae;g__Sebacina;s__Sebacina_sp	UCL8_007582
22_450	LC175652	Abies_sachalinensis	Japan	present_in	SH1731002.08FU	k__Fungi;p__Basidiomycota;c__Agaricomycetes;o__Sebacinales;f__Sebacinaceae;g__Sebacina;s__Sebacina_sp	UCL8_007582
22_449	Sebacina__AB922975	Tsuga	Japan	present_in	SH1731002.08FU	k__Fungi;p__Basidiomycota;c__Agaricomycetes;o__Sebacinales;f__Sebacinaceae;g__Sebacina;s__Sebacina_sp	UCL8_007582
22_514	Sebacina__AB218113__sample	Carpinus_japonica	Japan	present_in	SH1731064.08FU	k__Fungi;p__Basidiomycota;c__Agaricomycetes;o__Sebacinales;f__Sebacinaceae;g__Sebacina;s__Sebacina_sp	UCL8_007582
22_524	Sebacina__AB506973__sample	Cymbidium_macrorhizon	Japan	present_in	SH1672846.08FU	k__Fungi;p__Basidiomycota;c__Agaricomycetes;o__Sebacinales;f__Sebacinaceae;g__Sebacina;s__Sebacina_sp	UCL8_001587
22_641	AB848599		Japan	present_in	SH1682205.08FU	k__Fungi;p__Basidiomycota;c__Agaricomycetes;o__Sebacinales;f__Sebacinaceae;g__Sebacina;s__Sebacina_sp	UCL8_003407
22_642	AB972836	Pinus_densiflora_seedling	Japan	present_in	SH1731180.08FU	k__Fungi;p__Basidiomycota;c__Agaricomycetes;o__Sebacinales;f__Sebacinaceae;g__Sebacina;s__Sebacina_sp	UCL8_007582
22_662	AB831809		Japan	present_in	SH1731015.08FU	k__Fungi;p__Basidiomycota;c__Agaricomycetes;o__Sebacinales;f__Sebacinaceae;g__Sebacina;s__Sebacina_sp	UCL8_007582
22_680	Sebacina__AB701397	Pyrola_asarifolia_subsp._incarnata	Japan	present_in	SH1731015.08FU	k__Fungi;p__Basidiomycota;c__Agaricomycetes;o__Sebacinales;f__Sebacinaceae;g__Sebacina;s__Sebacina_sp	UCL8_007582
22_688	LC175649	Picea_jezoensis	Japan	present_in	SH1731015.08FU	k__Fungi;p__Basidiomycota;c__Agaricomycetes;o__Sebacinales;f__Sebacinaceae;g__Sebacina;s__Sebacina_sp	UCL8_007582
22_694	Sebacina__AB218165__sample	Fagus_japonica	Japan	present_in	SH1731195.08FU	k__Fungi;p__Basidiomycota;c__Agaricomycetes;o__Sebacinales;f__Sebacinaceae;g__Sebacina;s__Sebacina_sp	UCL8_007582
22_763	Sebacina__AB506919	Cymbidium_goeringii	Japan	present_in	SH1731192.08FU	k__Fungi;p__Basidiomycota;c__Agaricomycetes;o__Sebacinales;f__Sebacinaceae;g__Sebacina;s__Sebacina_sp	UCL8_007582
22_766	AB444650	Cephalanthera_falcata	Japan	present_in	SH1731155.08FU	k__Fungi;p__Basidiomycota;c__Agaricomycetes;o__Sebacinales;f__Sebacinaceae;g__Sebacina;s__Sebacina_sp	UCL8_007582
22_769	LC175653	Tilia_japonica	Japan	present_in	SH1731058.08FU	k__Fungi;p__Basidiomycota;c__Agaricomycetes;o__Sebacinales;f__Sebacinaceae;g__Sebacina;s__Sebacina_sp	UCL8_007582
22_812	Sebacina__AB218176__sample	Carpinus_japonica	Japan	present_in	SH1731058.08FU	k__Fungi;p__Basidiomycota;c__Agaricomycetes;o__Sebacinales;f__Sebacinaceae;g__Sebacina;s__Sebacina_sp	UCL8_007582
22_817	Sebacina__AB597708__sample	Lecanorchis_trachycaula	Japan	present_in	SH1731196.08FU	k__Fungi;p__Basidiomycota;c__Agaricomycetes;o__Sebacinales;f__Sebacinaceae;g__Sebacina;s__Sebacina_sp	UCL8_007582
22_825	Sebacina__AB218181__sample	Quercus_mongolica_subsp._crispula	Japan	present_in	SH1731055.08FU	k__Fungi;p__Basidiomycota;c__Agaricomycetes;o__Sebacinales;f__Sebacinaceae;g__Sebacina;s__Sebacina_sp	UCL8_007582
22_831	Sebacina__AB506917	Cymbidium_goeringii	Japan	present_in	SH1731300.08FU	k__Fungi;p__Basidiomycota;c__Agaricomycetes;o__Sebacinales;f__Sebacinaceae;g__Sebacina;s__Sebacina_sp	UCL8_007582
22_838	Sebacina__AB597638__sample	Lecanorchis_flavicans	Japan	present_in	SH1731142.08FU	k__Fungi;p__Basidiomycota;c__Agaricomycetes;o__Sebacinales;f__Sebacinaceae;g__Sebacina;s__Sebacina_sp	UCL8_007582
22_837	Sebacina__AB597637__sample	Lecanorchis_flavicans	Japan	present_in	SH1731142.08FU	k__Fungi;p__Basidiomycota;c__Agaricomycetes;o__Sebacinales;f__Sebacinaceae;g__Sebacina;s__Sebacina_sp	UCL8_007582
22_859	Sebacina__AB506929__sample	Cymbidium_lancifolium	Japan	present_in	SH1731117.08FU	k__Fungi;p__Basidiomycota;c__Agaricomycetes;o__Sebacinales;f__Sebacinaceae;g__Sebacina;s__Sebacina_sp	UCL8_007582
22_863	Sebacina__AB506933	Cymbidium_lancifolium	Japan	present_in	SH1731210.08FU	k__Fungi;p__Basidiomycota;c__Agaricomycetes;o__Sebacinales;f__Sebacinaceae;g__Sebacina;s__Sebacina_sp	UCL8_007582
22_877	Sebacina__AB506909__sample	Cymbidium_goeringii	Japan	present_in	SH1731091.08FU	k__Fungi;p__Basidiomycota;c__Agaricomycetes;o__Sebacinales;f__Sebacinaceae;g__Sebacina;s__Sebacina_sp	UCL8_007582
22_1008	AB636111	Cephalanthera_longibracteata	Japan	present_in	SH1731098.08FU	k__Fungi;p__Basidiomycota;c__Agaricomycetes;o__Sebacinales;f__Sebacinaceae;g__Sebacina;s__Sebacina_sp	UCL8_007582
22_1009	AB831811		Japan	present_in	SH1682243.08FU	k__Fungi;p__Basidiomycota;c__Agaricomycetes;o__Sebacinales;f__Sebacinaceae;g__Sebacina;s__Sebacina_sp	UCL8_003407
22_1014	Sebacina__AB506979	Cymbidium_macrorhizon	Japan	present_in	SH1731081.08FU	k__Fungi;p__Basidiomycota;c__Agaricomycetes;o__Sebacinales;f__Sebacinaceae;g__Sebacina;s__Sebacina_sp	UCL8_007582
22_1020	AB831810		Japan	present_in	SH1682248.08FU	k__Fungi;p__Basidiomycota;c__Agaricomycetes;o__Sebacinales;f__Sebacinaceae;g__Sebacina;s__Sebacina_sp	UCL8_003407
22_1036	Sebacina__AB506918	Cymbidium_goeringii	Japan	present_in	SH1744121.08FU	k__Fungi;p__Basidiomycota;c__Agaricomycetes;o__Sebacinales;f__Sebacinaceae;g__Sebacina;s__Sebacina_sp	UCL8_008621
22_1048	Sebacina__AB506953__sample	Cymbidium_macrorhizon	Japan	present_in	SH1731289.08FU	k__Fungi;p__Basidiomycota;c__Agaricomycetes;o__Sebacinales;f__Sebacinaceae;g__Sebacina;s__Sebacina_sp	UCL8_007582
22_1053	Sebacina__AB506958__sample	Cymbidium_macrorhizon	Japan	present_in	SH1682207.08FU	k__Fungi;p__Basidiomycota;c__Agaricomycetes;o__Sebacinales;f__Sebacinaceae;g__Sebacina;s__Sebacina_sp	UCL8_003407
22_1062	Sebacina__AB506905__sample	Cymbidium_goeringii	Japan	present_in	SH1731040.08FU	k__Fungi;p__Basidiomycota;c__Agaricomycetes;o__Sebacinales;f__Sebacinaceae;g__Sebacina;s__Sebacina_sp	UCL8_007582
22_1063	Sebacina__AB506906__sample	Cymbidium_goeringii	Japan	duplicate_of_Sebacina__AB506905__sample|Cymbidium_goeringii|Japan	SH1731040.08FU	k__Fungi;p__Basidiomycota;c__Agaricomycetes;o__Sebacinales;f__Sebacinaceae;g__Sebacina;s__Sebacina_sp	UCL8_007582
22_1064	Sebacina__AB506907__sample	Cymbidium_goeringii	Japan	duplicate_of_Sebacina__AB506905__sample|Cymbidium_goeringii|Japan	SH1731040.08FU	k__Fungi;p__Basidiomycota;c__Agaricomycetes;o__Sebacinales;f__Sebacinaceae;g__Sebacina;s__Sebacina_sp	UCL8_007582
22_1065	Sebacina__AB506908__sample	Cymbidium_goeringii	Japan	duplicate_of_Sebacina__AB506905__sample|Cymbidium_goeringii|Japan	SH1731040.08FU	k__Fungi;p__Basidiomycota;c__Agaricomycetes;o__Sebacinales;f__Sebacinaceae;g__Sebacina;s__Sebacina_sp	UCL8_007582
22_1073	Sebacina__AB506977	Cymbidium_macrorhizon	Japan	present_in	SH1731090.08FU	k__Fungi;p__Basidiomycota;c__Agaricomycetes;o__Sebacinales;f__Sebacinaceae;g__Sebacina;s__Sebacina_sp	UCL8_007582
22_1075	Sebacina__AB506904__sample	Cymbidium_goeringii	Japan	present_in	SH1731040.08FU	k__Fungi;p__Basidiomycota;c__Agaricomycetes;o__Sebacinales;f__Sebacinaceae;g__Sebacina;s__Sebacina_sp	UCL8_007582
22_1074	AB848612		Japan	present_in	SH1731150.08FU	k__Fungi;p__Basidiomycota;c__Agaricomycetes;o__Sebacinales;f__Sebacinaceae;g__Sebacina;s__Sebacina_sp	UCL8_007582
22_1077	LC175168	Abies_mariesii	Japan	present_in	SH1731150.08FU	k__Fungi;p__Basidiomycota;c__Agaricomycetes;o__Sebacinales;f__Sebacinaceae;g__Sebacina;s__Sebacina_sp	UCL8_007582
22_1076	Sebacina__AB506903__sample	Cymbidium_goeringii	Japan	present_in	SH1731040.08FU	k__Fungi;p__Basidiomycota;c__Agaricomycetes;o__Sebacinales;f__Sebacinaceae;g__Sebacina;s__Sebacina_sp	UCL8_007582
22_1079	Sebacina__AB506975	Cymbidium_macrorhizon	Japan	present_in	SH1731090.08FU	k__Fungi;p__Basidiomycota;c__Agaricomycetes;o__Sebacinales;f__Sebacinaceae;g__Sebacina;s__Sebacina_sp	UCL8_007582
22_1080	Sebacina__AB506976	Cymbidium_macrorhizon	Japan	present_in	SH1731090.08FU	k__Fungi;p__Basidiomycota;c__Agaricomycetes;o__Sebacinales;f__Sebacinaceae;g__Sebacina;s__Sebacina_sp	UCL8_007582
22_1089	AB831805		Japan	present_in	SH1744129.08FU	k__Fungi;p__Basidiomycota;c__Agaricomycetes;o__Sebacinales;f__Sebacinaceae;g__Sebacina;s__Sebacina_sp	UCL8_008621
22_1125	Sebacina__AB506949__sample	Cymbidium_macrorhizon	Japan	present_in	SH1672846.08FU	k__Fungi;p__Basidiomycota;c__Agaricomycetes;o__Sebacinales;f__Sebacinaceae;g__Sebacina;s__Sebacina_sp	UCL8_001587
22_1126	Sebacina__AB597652__sample	Lecanorchis_japonica	Japan	present_in	SH1668384.08FU	k__Fungi;p__Basidiomycota;c__Agaricomycetes;o__Sebacinales;f__Sebacinaceae;g__Sebacina;s__Sebacina_sp	UCL8_000833
22_1128	AB568450	Cephalanthera_longibracteata	Japan	present_in	SH1731055.08FU	k__Fungi;p__Basidiomycota;c__Agaricomycetes;o__Sebacinales;f__Sebacinaceae;g__Sebacina;s__Sebacina_sp	UCL8_007582
22_1131	Sebacina__AB506948__sample	Cymbidium_macrorhizon	Japan	present_in	SH1682231.08FU	k__Fungi;p__Basidiomycota;c__Agaricomycetes;o__Sebacinales;f__Sebacinaceae;g__Sebacina;s__Sebacina_sp	UCL8_003407
22_1133	Sebacina__AB506901__sample	Cymbidium_goeringii	Japan	present_in	SH1672881.08FU	k__Fungi;p__Basidiomycota;c__Agaricomycetes;o__Sebacinales;f__Sebacinaceae;g__Sebacina;s__Sebacina_sp	UCL8_001587
22_1141	Sebacina__AB506981	Cymbidium_macrorhizon	Japan	present_in	SH1672883.08FU	k__Fungi;p__Basidiomycota;c__Agaricomycetes;o__Sebacinales;f__Sebacinaceae;g__Sebacina;s__Sebacina_sp	UCL8_001587
22_1150	Sebacina__AB506920	Cymbidium_lancifolium	Japan	present_in	SH1682230.08FU	k__Fungi;p__Basidiomycota;c__Agaricomycetes;o__Sebacinales;f__Sebacinaceae;g__Sebacina;s__Sebacina_sp	UCL8_003407
22_1152	AB848601		Japan	present_in	SH1731342.08FU	k__Fungi;p__Basidiomycota;c__Agaricomycetes;o__Sebacinales;f__Sebacinaceae;g__Sebacina;s__Sebacina_sp	UCL8_007582
22_1156	AB848608	Fagus_sp.	Japan	present_in	SH1744140.08FU	k__Fungi;p__Basidiomycota;c__Agaricomycetes;o__Sebacinales;f__Sebacinaceae;g__Sebacina;s__Sebacina_sp	UCL8_008621
22_1161	LC219783	Abies	Japan	present_in	SH1731150.08FU	k__Fungi;p__Basidiomycota;c__Agaricomycetes;o__Sebacinales;f__Sebacinaceae;g__Sebacina;s__Sebacina_sp	UCL8_007582
22_668	Sebacina__AB587770__sample	Pinus_thunbergii	Korea,_Republic_of	present_in	SH1731244.08FU	k__Fungi;p__Basidiomycota;c__Agaricomycetes;o__Sebacinales;f__Sebacinaceae;g__Sebacina;s__Sebacina_sp	UCL8_007582
22_686	KR019820	Picea_abies	Latvia	duplicate_of_HQ154286|Gentiana_asclepiadea|Germany	SH1731015.08FU	k__Fungi;p__Basidiomycota;c__Agaricomycetes;o__Sebacinales;f__Sebacinaceae;g__Sebacina;s__Sebacina_sp	UCL8_007582
22_1155	KR019821	Picea_abies	Latvia	present_in	SH1744139.08FU	k__Fungi;p__Basidiomycota;c__Agaricomycetes;o__Sebacinales;f__Sebacinaceae;g__Sebacina;s__Sebacina_sp	UCL8_008621
22_1088	Sebacina__KT224924	Asteropeia_mcphersonii	Madagascar	present_in	SH1731139.08FU	k__Fungi;p__Basidiomycota;c__Agaricomycetes;o__Sebacinales;f__Sebacinaceae;g__Sebacina;s__Sebacina_sp	UCL8_007582
22_127	KF041428	Abies_religiosa	Mexico	present_in	SH1731018.08FU	k__Fungi;p__Basidiomycota;c__Agaricomycetes;o__Sebacinales;f__Sebacinaceae;g__Sebacina;s__Sebacina_sp	UCL8_007582
22_521	FJ196971	Quercus	Mexico	present_in	SH1672827.08FU	k__Fungi;p__Basidiomycota;c__Agaricomycetes;o__Sebacinales;f__Sebacinaceae;g__Sebacina;s__Sebacina_sp	UCL8_001587
22_537	KY574380		Mexico	present_in	SH1672823.08FU	k__Fungi;p__Basidiomycota;c__Agaricomycetes;o__Sebacinales;f__Sebacinaceae;g__Sebacina;s__Sebacina_sp	UCL8_001587
22_576	KF041431	Abies_religiosa	Mexico	present_in	SH1672831.08FU	k__Fungi;p__Basidiomycota;c__Agaricomycetes;o__Sebacinales;f__Sebacinaceae;g__Sebacina;s__Sebacina_sp	UCL8_001587
22_613	KF041415	Abies_religiosa	Mexico	present_in	SH1731004.08FU	k__Fungi;p__Basidiomycota;c__Agaricomycetes;o__Sebacinales;f__Sebacinaceae;g__Sebacina;s__Sebacina_sp	UCL8_007582
22_700	FJ196970	Quercus	Mexico	present_in	SH1731188.08FU	k__Fungi;p__Basidiomycota;c__Agaricomycetes;o__Sebacinales;f__Sebacinaceae;g__Sebacina;s__Sebacina_sp	UCL8_007582
22_829	FJ196972	Quercus	Mexico	present_in	SH1731257.08FU	k__Fungi;p__Basidiomycota;c__Agaricomycetes;o__Sebacinales;f__Sebacinaceae;g__Sebacina;s__Sebacina_sp	UCL8_007582
22_1017	HQ271375		Mexico	present_in	SH1731251.08FU	k__Fungi;p__Basidiomycota;c__Agaricomycetes;o__Sebacinales;f__Sebacinaceae;g__Sebacina;s__Sebacina_sp	UCL8_007582
22_1018	HQ271380	Pinus	Mexico	present_in	SH1744120.08FU	k__Fungi;p__Basidiomycota;c__Agaricomycetes;o__Sebacinales;f__Sebacinaceae;g__Sebacina;s__Sebacina_sp	UCL8_008621
22_410	Sebacina__UDB026611__Cistus_monspeliensis_sample	Cistus_monspeliensis	Morocco	present_in	SH1731002.08FU	k__Fungi;p__Basidiomycota;c__Agaricomycetes;o__Sebacinales;f__Sebacinaceae;g__Sebacina;s__Sebacina_sp	UCL8_007582
22_464	Sebacina__UDB025540__TU116763	Cedrus_atlantica	Morocco	duplicate_of_Sebacina__UDB004910__sample|Cedrus_libani|Turkey	SH1672829.08FU	k__Fungi;p__Basidiomycota;c__Agaricomycetes;o__Sebacinales;f__Sebacinaceae;g__Sebacina;s__Sebacina_sp	UCL8_001587
22_1029	LC122080		New_Caledonia	present_in	SH1731261.08FU	k__Fungi;p__Basidiomycota;c__Agaricomycetes;o__Sebacinales;f__Sebacinaceae;g__Sebacina;s__Sebacina_sp	UCL8_007582
22_1103	LC122197		New_Caledonia	present_in	SH1731311.08FU	k__Fungi;p__Basidiomycota;c__Agaricomycetes;o__Sebacinales;f__Sebacinaceae;g__Sebacina;s__Sebacina_sp	UCL8_007582
22_364	Sebacina__GU817087	Bistorta_vivipara	Norway	present_in	SH1731039.08FU	k__Fungi;p__Basidiomycota;c__Agaricomycetes;o__Sebacinales;f__Sebacinaceae;g__Sebacina;s__Sebacina_sp	UCL8_007582
22_365	Sebacina__GU817089	Bistorta_vivipara	Norway	duplicate_of_Sebacina__GU817087|Bistorta_vivipara|Norway	SH1731039.08FU	k__Fungi;p__Basidiomycota;c__Agaricomycetes;o__Sebacinales;f__Sebacinaceae;g__Sebacina;s__Sebacina_sp	UCL8_007582
22_366	Sebacina__GU817090	Bistorta_vivipara	Norway	duplicate_of_Sebacina__GU817087|Bistorta_vivipara|Norway	SH1731039.08FU	k__Fungi;p__Basidiomycota;c__Agaricomycetes;o__Sebacinales;f__Sebacinaceae;g__Sebacina;s__Sebacina_sp	UCL8_007582
22_367	Sebacina__GU817091	Bistorta_vivipara	Norway	duplicate_of_Sebacina__GU817087|Bistorta_vivipara|Norway	SH1731039.08FU	k__Fungi;p__Basidiomycota;c__Agaricomycetes;o__Sebacinales;f__Sebacinaceae;g__Sebacina;s__Sebacina_sp	UCL8_007582
22_371	Sebacina__GU817095	Bistorta_vivipara	Norway	duplicate_of_Sebacina__GU817087|Bistorta_vivipara|Norway	SH1731039.08FU	k__Fungi;p__Basidiomycota;c__Agaricomycetes;o__Sebacinales;f__Sebacinaceae;g__Sebacina;s__Sebacina_sp	UCL8_007582
22_372	Sebacina__GU817096	Bistorta_vivipara	Norway	duplicate_of_Sebacina__GU817087|Bistorta_vivipara|Norway	SH1731039.08FU	k__Fungi;p__Basidiomycota;c__Agaricomycetes;o__Sebacinales;f__Sebacinaceae;g__Sebacina;s__Sebacina_sp	UCL8_007582
22_373	Sebacina__GU817097	Bistorta_vivipara	Norway	duplicate_of_Sebacina__GU817087|Bistorta_vivipara|Norway	SH1731039.08FU	k__Fungi;p__Basidiomycota;c__Agaricomycetes;o__Sebacinales;f__Sebacinaceae;g__Sebacina;s__Sebacina_sp	UCL8_007582
22_374	Sebacina__GU817205	Bistorta_vivipara	Norway	duplicate_of_Sebacina__GU817087|Bistorta_vivipara|Norway	SH1731039.08FU	k__Fungi;p__Basidiomycota;c__Agaricomycetes;o__Sebacinales;f__Sebacinaceae;g__Sebacina;s__Sebacina_sp	UCL8_007582
22_518	Sebacina__UDB026865__Bistorta_vivipara_sample	Bistorta_vivipara	Norway	present_in	SH1672827.08FU	k__Fungi;p__Basidiomycota;c__Agaricomycetes;o__Sebacinales;f__Sebacinaceae;g__Sebacina;s__Sebacina_sp	UCL8_001587
22_941	Sebacina__HQ445275	Dryas_octopetala	Norway	present_in	SH1731026.08FU	k__Fungi;p__Basidiomycota;c__Agaricomycetes;o__Sebacinales;f__Sebacinaceae;g__Sebacina;s__Sebacina_sp	UCL8_007582
22_943	Sebacina__HQ445298	Dryas_octopetala	Norway	present_in	SH1731026.08FU	k__Fungi;p__Basidiomycota;c__Agaricomycetes;o__Sebacinales;f__Sebacinaceae;g__Sebacina;s__Sebacina_sp	UCL8_007582
22_1011	Sebacina__UDB026864__Bistorta_vivipara_sample	Bistorta_vivipara	Norway	present_in	SH1731126.08FU	k__Fungi;p__Basidiomycota;c__Agaricomycetes;o__Sebacinales;f__Sebacinaceae;g__Sebacina;s__Sebacina_sp	UCL8_007582
22_1039	Sebacina__HQ445474	Dryas_octopetala	Norway	present_in	SH1682228.08FU	k__Fungi;p__Basidiomycota;c__Agaricomycetes;o__Sebacinales;f__Sebacinaceae;g__Sebacina;s__Sebacina_sp	UCL8_003407
22_1104	Sebacina__HQ445482	Dryas_octopetala	Norway	present_in	SH1682209.08FU	k__Fungi;p__Basidiomycota;c__Agaricomycetes;o__Sebacinales;f__Sebacinaceae;g__Sebacina;s__Sebacina_sp	UCL8_003407
22_1107	Sebacina__GU817065	Bistorta_vivipara	Norway	present_in	SH1682209.08FU	k__Fungi;p__Basidiomycota;c__Agaricomycetes;o__Sebacinales;f__Sebacinaceae;g__Sebacina;s__Sebacina_sp	UCL8_003407
22_1108	Sebacina__GU817067	Bistorta_vivipara	Norway	duplicate_of_Sebacina__GU817065|Bistorta_vivipara|Norway	SH1682209.08FU	k__Fungi;p__Basidiomycota;c__Agaricomycetes;o__Sebacinales;f__Sebacinaceae;g__Sebacina;s__Sebacina_sp	UCL8_003407
22_1109	Sebacina__GU817080	Bistorta_vivipara	Norway	duplicate_of_Sebacina__GU817065|Bistorta_vivipara|Norway	SH1682209.08FU	k__Fungi;p__Basidiomycota;c__Agaricomycetes;o__Sebacinales;f__Sebacinaceae;g__Sebacina;s__Sebacina_sp	UCL8_003407
22_321	HG796962	Quercus_spp.	Pakistan	present_in	SH1731087.08FU	k__Fungi;p__Basidiomycota;c__Agaricomycetes;o__Sebacinales;f__Sebacinaceae;g__Sebacina;s__Sebacina_sp	UCL8_007582
22_664	HG796955	Populus_ciliata	Pakistan	present_in	SH1731015.08FU	k__Fungi;p__Basidiomycota;c__Agaricomycetes;o__Sebacinales;f__Sebacinaceae;g__Sebacina;s__Sebacina_sp	UCL8_007582
22_714	HG796954	Alnus_nitida	Pakistan	present_in	SH1744123.08FU	k__Fungi;p__Basidiomycota;c__Agaricomycetes;o__Sebacinales;f__Sebacinaceae;g__Sebacina;s__Sebacina_sp	UCL8_008621
22_866	HG796953	Populus_ciliata	Pakistan	present_in	SH1731076.08FU	k__Fungi;p__Basidiomycota;c__Agaricomycetes;o__Sebacinales;f__Sebacinaceae;g__Sebacina;s__Sebacina_sp	UCL8_007582
22_400	JX868514	Picea_abies	Poland	present_in	SH1731032.08FU	k__Fungi;p__Basidiomycota;c__Agaricomycetes;o__Sebacinales;f__Sebacinaceae;g__Sebacina;s__Sebacina_sp	UCL8_007582
22_413	KF484432	Abies_alba	Poland	present_in	SH1731002.08FU	k__Fungi;p__Basidiomycota;c__Agaricomycetes;o__Sebacinales;f__Sebacinaceae;g__Sebacina;s__Sebacina_sp	UCL8_007582
22_448	KF484424	Abies_alba	Poland	present_in	SH1731002.08FU	k__Fungi;p__Basidiomycota;c__Agaricomycetes;o__Sebacinales;f__Sebacinaceae;g__Sebacina;s__Sebacina_sp	UCL8_007582
22_868	KX438343	Corylus_avellana	Poland	present_in	SH1731054.08FU	k__Fungi;p__Basidiomycota;c__Agaricomycetes;o__Sebacinales;f__Sebacinaceae;g__Sebacina;s__Sebacina_sp	UCL8_007582
22_869	KX438342	Corylus_avellana	Poland	present_in	SH1731054.08FU	k__Fungi;p__Basidiomycota;c__Agaricomycetes;o__Sebacinales;f__Sebacinaceae;g__Sebacina;s__Sebacina_sp	UCL8_007582
22_406	Sebacina__EU403090__sample	Quercus_rotundifolia	Portugal	present_in	SH1731002.08FU	k__Fungi;p__Basidiomycota;c__Agaricomycetes;o__Sebacinales;f__Sebacinaceae;g__Sebacina;s__Sebacina_sp	UCL8_007582
22_416	Sebacina__FJ897218__sample	Quercus	Portugal	present_in	SH1731002.08FU	k__Fungi;p__Basidiomycota;c__Agaricomycetes;o__Sebacinales;f__Sebacinaceae;g__Sebacina;s__Sebacina_sp	UCL8_007582
22_503	FM203298		Portugal	present_in	SH1731104.08FU	k__Fungi;p__Basidiomycota;c__Agaricomycetes;o__Sebacinales;f__Sebacinaceae;g__Sebacina;s__Sebacina_sp	UCL8_007582
22_703	Sebacina__HQ625482	Arbutus_unedo	Portugal	present_in	SH1744100.08FU	k__Fungi;p__Basidiomycota;c__Agaricomycetes;o__Sebacinales;f__Sebacinaceae;g__Sebacina;s__Sebacina_sp	UCL8_008621
22_131	KM576592	Quercus_robur	Romania	present_in	SH1731168.08FU	k__Fungi;p__Basidiomycota;c__Agaricomycetes;o__Sebacinales;f__Sebacinaceae;g__Sebacina;s__Sebacina_sp	UCL8_007582
22_420	KM576589	Quercus_petraea	Romania	present_in	SH1731002.08FU	k__Fungi;p__Basidiomycota;c__Agaricomycetes;o__Sebacinales;f__Sebacinaceae;g__Sebacina;s__Sebacina_sp	UCL8_007582
22_1044	KM576577	Quercus_petraea	Romania	present_in	SH1731020.08FU	k__Fungi;p__Basidiomycota;c__Agaricomycetes;o__Sebacinales;f__Sebacinaceae;g__Sebacina;s__Sebacina_sp	UCL8_007582
22_1057	KM576585	Quercus_petraea	Romania	present_in	SH1682213.08FU	k__Fungi;p__Basidiomycota;c__Agaricomycetes;o__Sebacinales;f__Sebacinaceae;g__Sebacina;s__Sebacina_sp	UCL8_003407
22_1157	KM576593	Quercus_petraea	Romania	present_in	SH1682289.08FU	k__Fungi;p__Basidiomycota;c__Agaricomycetes;o__Sebacinales;f__Sebacinaceae;g__Sebacina;s__Sebacina_sp	UCL8_003407
22_661	KP783469		Russian_Federation	present_in	SH1731032.08FU	k__Fungi;p__Basidiomycota;c__Agaricomycetes;o__Sebacinales;f__Sebacinaceae;g__Sebacina;s__Sebacina_sp	UCL8_007582
22_676	KJ769301	Pinus_koraiensis	Russian_Federation	present_in	SH1731032.08FU	k__Fungi;p__Basidiomycota;c__Agaricomycetes;o__Sebacinales;f__Sebacinaceae;g__Sebacina;s__Sebacina_sp	UCL8_007582
22_16	Sebacina__UDB009836__sample	Alnus_viridis	Slovenia	duplicate_of_Sebacina__JN197942||Unspecified	SH1731008.08FU	k__Fungi;p__Basidiomycota;c__Agaricomycetes;o__Sebacinales;f__Sebacinaceae;g__Sebacina;s__Sebacina_sp	UCL8_007582
22_116	MN265709	Abies_alba	Slovenia	present_in	SH1731018.08FU	k__Fungi;p__Basidiomycota;c__Agaricomycetes;o__Sebacinales;f__Sebacinaceae;g__Sebacina;s__Sebacina_sp	UCL8_007582
22_402	MN265705	Abies_alba	Slovenia	present_in	SH1731002.08FU	k__Fungi;p__Basidiomycota;c__Agaricomycetes;o__Sebacinales;f__Sebacinaceae;g__Sebacina;s__Sebacina_sp	UCL8_007582
22_418	MN265715	Abies_alba	Slovenia	present_in	SH1731002.08FU	k__Fungi;p__Basidiomycota;c__Agaricomycetes;o__Sebacinales;f__Sebacinaceae;g__Sebacina;s__Sebacina_sp	UCL8_007582
22_419	HF674556	Fagus_sylvatica	Slovenia	present_in	SH1731002.08FU	k__Fungi;p__Basidiomycota;c__Agaricomycetes;o__Sebacinales;f__Sebacinaceae;g__Sebacina;s__Sebacina_sp	UCL8_007582
22_422	MN265706	Abies_alba	Slovenia	duplicate_of_MF352776|Pinus_sylvestris|United_Kingdom	SH1731002.08FU	k__Fungi;p__Basidiomycota;c__Agaricomycetes;o__Sebacinales;f__Sebacinaceae;g__Sebacina;s__Sebacina_sp	UCL8_007582
22_423	MN265707	Abies_alba	Slovenia	duplicate_of_MF352776|Pinus_sylvestris|United_Kingdom	SH1731002.08FU	k__Fungi;p__Basidiomycota;c__Agaricomycetes;o__Sebacinales;f__Sebacinaceae;g__Sebacina;s__Sebacina_sp	UCL8_007582
22_424	MN265713	Abies_alba	Slovenia	duplicate_of_MF352776|Pinus_sylvestris|United_Kingdom	SH1731002.08FU	k__Fungi;p__Basidiomycota;c__Agaricomycetes;o__Sebacinales;f__Sebacinaceae;g__Sebacina;s__Sebacina_sp	UCL8_007582
22_453	MN265702	Abies_alba	Slovenia	present_in	SH1731002.08FU	k__Fungi;p__Basidiomycota;c__Agaricomycetes;o__Sebacinales;f__Sebacinaceae;g__Sebacina;s__Sebacina_sp	UCL8_007582
22_691	MN265697	Abies_alba	Slovenia	present_in	SH1731032.08FU	k__Fungi;p__Basidiomycota;c__Agaricomycetes;o__Sebacinales;f__Sebacinaceae;g__Sebacina;s__Sebacina_sp	UCL8_007582
22_415	KY694396	Pinus_pinaster	Spain	present_in	SH1731002.08FU	k__Fungi;p__Basidiomycota;c__Agaricomycetes;o__Sebacinales;f__Sebacinaceae;g__Sebacina;s__Sebacina_sp	UCL8_007582
22_383	Sebacina__HQ445346	Dryas_octopetala	Svalbard_and_Jan_Mayen	present_in	SH1682200.08FU	k__Fungi;p__Basidiomycota;c__Agaricomycetes;o__Sebacinales;f__Sebacinaceae;g__Sebacina;s__Sebacina_sp	UCL8_003407
22_820	HQ215801		Svalbard_and_Jan_Mayen	present_in	SH1672828.08FU	k__Fungi;p__Basidiomycota;c__Agaricomycetes;o__Sebacinales;f__Sebacinaceae;g__Sebacina;s__Sebacina_sp	UCL8_001587
22_902	HQ215802		Svalbard_and_Jan_Mayen	present_in	SH1682204.08FU	k__Fungi;p__Basidiomycota;c__Agaricomycetes;o__Sebacinales;f__Sebacinaceae;g__Sebacina;s__Sebacina_sp	UCL8_003407
22_936	HQ215803		Svalbard_and_Jan_Mayen	present_in	SH1731026.08FU	k__Fungi;p__Basidiomycota;c__Agaricomycetes;o__Sebacinales;f__Sebacinaceae;g__Sebacina;s__Sebacina_sp	UCL8_007582
22_942	Sebacina__HQ445284	Dryas_octopetala	Svalbard_and_Jan_Mayen	present_in	SH1731026.08FU	k__Fungi;p__Basidiomycota;c__Agaricomycetes;o__Sebacinales;f__Sebacinaceae;g__Sebacina;s__Sebacina_sp	UCL8_007582
22_988	Sebacina__UDB027305__Bistorta_vivipara_sample	Bistorta_vivipara	Svalbard_and_Jan_Mayen	present_in	SH1682226.08FU	k__Fungi;p__Basidiomycota;c__Agaricomycetes;o__Sebacinales;f__Sebacinaceae;g__Sebacina;s__Sebacina_sp	UCL8_003407
22_392	Sebacina__KX886152	Fagus_sylvatica	Switzerland	present_in	SH1682200.08FU	k__Fungi;p__Basidiomycota;c__Agaricomycetes;o__Sebacinales;f__Sebacinaceae;g__Sebacina;s__Sebacina_sp	UCL8_003407
22_687	Sebacina__KC818335		Switzerland	duplicate_of_HQ154286|Gentiana_asclepiadea|Germany	SH1731015.08FU	k__Fungi;p__Basidiomycota;c__Agaricomycetes;o__Sebacinales;f__Sebacinaceae;g__Sebacina;s__Sebacina_sp	UCL8_007582
22_84	FJ455033	Aphyllorchis_montana	Thailand	present_in	SH1731158.08FU	k__Fungi;p__Basidiomycota;c__Agaricomycetes;o__Sebacinales;f__Sebacinaceae;g__Sebacina;s__Sebacina_sp	UCL8_007582
22_106	Sebacina__UDB025331__TU116587		Thailand	present_in	SH1731095.08FU	k__Fungi;p__Basidiomycota;c__Agaricomycetes;o__Sebacinales;f__Sebacinaceae;g__Sebacina;s__Sebacina_sp	UCL8_007582
22_878	Sebacina__UDB013749__sample	Pinus	Thailand	present_in	SH1731219.08FU	k__Fungi;p__Basidiomycota;c__Agaricomycetes;o__Sebacinales;f__Sebacinaceae;g__Sebacina;s__Sebacina_sp	UCL8_007582
22_992	FJ454897	Aphyllorchis_caudata	Thailand	present_in	SH1672860.08FU	k__Fungi;p__Basidiomycota;c__Agaricomycetes;o__Sebacinales;f__Sebacinaceae;g__Sebacina;s__Sebacina_sp	UCL8_001587
22_1016	Sebacina__UDB025282__TU116521		Thailand	present_in	SH1682244.08FU	k__Fungi;p__Basidiomycota;c__Agaricomycetes;o__Sebacinales;f__Sebacinaceae;g__Sebacina;s__Sebacina_sp	UCL8_003407
22_1022	FJ455011	Aphyllorchis_montana	Thailand	present_in	SH1731255.08FU	k__Fungi;p__Basidiomycota;c__Agaricomycetes;o__Sebacinales;f__Sebacinaceae;g__Sebacina;s__Sebacina_sp	UCL8_007582
22_1119	FJ454903	Aphyllorchis_caudata	Thailand	present_in	SH1682272.08FU	k__Fungi;p__Basidiomycota;c__Agaricomycetes;o__Sebacinales;f__Sebacinaceae;g__Sebacina;s__Sebacina_sp	UCL8_003407
22_1132	AB453033	Dipterocarpaceae	Thailand	present_in	SH1731166.08FU	k__Fungi;p__Basidiomycota;c__Agaricomycetes;o__Sebacinales;f__Sebacinaceae;g__Sebacina;s__Sebacina_sp	UCL8_007582
22_456	Sebacina__UDB004923__sample	Cedrus_libani	Turkey	present_in	SH1672829.08FU	k__Fungi;p__Basidiomycota;c__Agaricomycetes;o__Sebacinales;f__Sebacinaceae;g__Sebacina;s__Sebacina_sp	UCL8_001587
22_463	Sebacina__UDB004910__sample	Cedrus_libani	Turkey	present_in	SH1672829.08FU	k__Fungi;p__Basidiomycota;c__Agaricomycetes;o__Sebacinales;f__Sebacinaceae;g__Sebacina;s__Sebacina_sp	UCL8_001587
22_647	Sebacina__UDB004912__sample	Cedrus_libani	Turkey	present_in	SH1731077.08FU	k__Fungi;p__Basidiomycota;c__Agaricomycetes;o__Sebacinales;f__Sebacinaceae;g__Sebacina;s__Sebacina_sp	UCL8_007582
22_421	MF352776	Pinus_sylvestris	United_Kingdom	present_in	SH1731002.08FU	k__Fungi;p__Basidiomycota;c__Agaricomycetes;o__Sebacinales;f__Sebacinaceae;g__Sebacina;s__Sebacina_sp	UCL8_007582
22_458	MF352775	Pinus_sylvestris	United_Kingdom	present_in	SH1800277.08FU	k__Fungi;p__Basidiomycota;c__Agaricomycetes;o__Sebacinales;f__Sebacinaceae;g__Sebacina;s__Sebacina_sp	UCL8_010859
22_767	FN706531		United_Kingdom	present_in	SH1682201.08FU	k__Fungi;p__Basidiomycota;c__Agaricomycetes;o__Sebacinales;f__Sebacinaceae;g__Sebacina;s__Sebacina_sp	UCL8_003407
22_777	EU668220	Fagus_sylvatica	United_Kingdom	present_in	SH1731010.08FU	k__Fungi;p__Basidiomycota;c__Agaricomycetes;o__Sebacinales;f__Sebacinaceae;g__Sebacina;s__Sebacina_sp	UCL8_007582
22_958	MF352774	Pinus_sylvestris	United_Kingdom	present_in	SH1800252.08FU	k__Fungi;p__Basidiomycota;c__Agaricomycetes;o__Sebacinales;f__Sebacinaceae;g__Sebacina;s__Sebacina_sp	UCL8_010859
22_1154	EU668225	Fagus_sylvatica	United_Kingdom	present_in	SH1731085.08FU	k__Fungi;p__Basidiomycota;c__Agaricomycetes;o__Sebacinales;f__Sebacinaceae;g__Sebacina;s__Sebacina_sp	UCL8_007582
22_113	JQ393121		United_States	present_in	SH1731018.08FU	k__Fungi;p__Basidiomycota;c__Agaricomycetes;o__Sebacinales;f__Sebacinaceae;g__Sebacina;s__Sebacina_sp	UCL8_007582
22_117	Sebacina__AY969472		United_States	present_in	SH1731018.08FU	k__Fungi;p__Basidiomycota;c__Agaricomycetes;o__Sebacinales;f__Sebacinaceae;g__Sebacina;s__Sebacina_sp	UCL8_007582
22_118	Sebacina__AY969540		United_States	present_in	SH1731018.08FU	k__Fungi;p__Basidiomycota;c__Agaricomycetes;o__Sebacinales;f__Sebacinaceae;g__Sebacina;s__Sebacina_sp	UCL8_007582
22_121	JX630709	Dryas_integrifolia	United_States	present_in	SH1731018.08FU	k__Fungi;p__Basidiomycota;c__Agaricomycetes;o__Sebacinales;f__Sebacinaceae;g__Sebacina;s__Sebacina_sp	UCL8_007582
22_320	JQ393116		United_States	present_in	SH1731087.08FU	k__Fungi;p__Basidiomycota;c__Agaricomycetes;o__Sebacinales;f__Sebacinaceae;g__Sebacina;s__Sebacina_sp	UCL8_007582
22_337	HQ667916	Hexalectris_spicata	United_States	present_in	SH1731001.08FU	k__Fungi;p__Basidiomycota;c__Agaricomycetes;o__Sebacinales;f__Sebacinaceae;g__Sebacina;s__Sebacina_sp	UCL8_007582
22_338	HQ667920	Hexalectris_spicata	United_States	duplicate_of_HQ667916|Hexalectris_spicata|United_States	SH1731001.08FU	k__Fungi;p__Basidiomycota;c__Agaricomycetes;o__Sebacinales;f__Sebacinaceae;g__Sebacina;s__Sebacina_sp	UCL8_007582
22_384	FJ440936	Pyrola	United_States	present_in	SH1682257.08FU	k__Fungi;p__Basidiomycota;c__Agaricomycetes;o__Sebacinales;f__Sebacinaceae;g__Sebacina;s__Sebacina_sp	UCL8_003407
22_385	Sebacina__FJ440936_duplic1		United_States	duplicate_of_FJ440936|Pyrola|United_States	SH1682257.08FU	k__Fungi;p__Basidiomycota;c__Agaricomycetes;o__Sebacinales;f__Sebacinaceae;g__Sebacina;s__Sebacina_sp	UCL8_003407
22_401	Sebacina__MG761602	Pinus_ponderosa	United_States	present_in	SH1731032.08FU	k__Fungi;p__Basidiomycota;c__Agaricomycetes;o__Sebacinales;f__Sebacinaceae;g__Sebacina;s__Sebacina_sp	UCL8_007582
22_440	Sebacina__GU328507		United_States	duplicate_of_HQ154281|Campanula_scheuchzeri|Germany	SH1731002.08FU	k__Fungi;p__Basidiomycota;c__Agaricomycetes;o__Sebacinales;f__Sebacinaceae;g__Sebacina;s__Sebacina_sp	UCL8_007582
22_462	JF304349		United_States	present_in	SH1731202.08FU	k__Fungi;p__Basidiomycota;c__Agaricomycetes;o__Sebacinales;f__Sebacinaceae;g__Sebacina;s__Sebacina_sp	UCL8_007582
22_472	JX630340	Salix_arctica	United_States	present_in	SH1672851.08FU	k__Fungi;p__Basidiomycota;c__Agaricomycetes;o__Sebacinales;f__Sebacinaceae;g__Sebacina;s__Sebacina_sp	UCL8_001587
22_479	Sebacina__KF297076		United_States	present_in	SH1672869.08FU	k__Fungi;p__Basidiomycota;c__Agaricomycetes;o__Sebacinales;f__Sebacinaceae;g__Sebacina;s__Sebacina_sp	UCL8_001587
22_497	JX630750	Salix_arctica	United_States	present_in	SH1731357.08FU	k__Fungi;p__Basidiomycota;c__Agaricomycetes;o__Sebacinales;f__Sebacinaceae;g__Sebacina;s__Sebacina_sp	UCL8_007582
22_513	HQ667846	Hexalectris_arizonica	United_States	present_in	SH1672823.08FU	k__Fungi;p__Basidiomycota;c__Agaricomycetes;o__Sebacinales;f__Sebacinaceae;g__Sebacina;s__Sebacina_sp	UCL8_001587
22_512	EU819519	Carya_sp.	United_States	present_in	SH1672856.08FU	k__Fungi;p__Basidiomycota;c__Agaricomycetes;o__Sebacinales;f__Sebacinaceae;g__Sebacina;s__Sebacina_sp	UCL8_001587
22_515	HQ667839	Hexalectris_arizonica	United_States	present_in	SH1672823.08FU	k__Fungi;p__Basidiomycota;c__Agaricomycetes;o__Sebacinales;f__Sebacinaceae;g__Sebacina;s__Sebacina_sp	UCL8_001587
22_516	HQ667841	Hexalectris_arizonica	United_States	present_in	SH1672823.08FU	k__Fungi;p__Basidiomycota;c__Agaricomycetes;o__Sebacinales;f__Sebacinaceae;g__Sebacina;s__Sebacina_sp	UCL8_001587
22_517	AY243531	Hexalectris_spicata_var._arizonica	United_States	present_in	SH1672823.08FU	k__Fungi;p__Basidiomycota;c__Agaricomycetes;o__Sebacinales;f__Sebacinaceae;g__Sebacina;s__Sebacina_sp	UCL8_001587
22_519	HQ667844	Hexalectris_arizonica	United_States	present_in	SH1672823.08FU	k__Fungi;p__Basidiomycota;c__Agaricomycetes;o__Sebacinales;f__Sebacinaceae;g__Sebacina;s__Sebacina_sp	UCL8_001587
22_520	EF417824	Quercus_wislizeni	United_States	present_in	SH1672827.08FU	k__Fungi;p__Basidiomycota;c__Agaricomycetes;o__Sebacinales;f__Sebacinaceae;g__Sebacina;s__Sebacina_sp	UCL8_001587
22_523	HQ667866	Hexalectris_nitida	United_States	present_in	SH1672827.08FU	k__Fungi;p__Basidiomycota;c__Agaricomycetes;o__Sebacinales;f__Sebacinaceae;g__Sebacina;s__Sebacina_sp	UCL8_001587
22_525	HQ667828	Hexalectris_colemanii	United_States	present_in	SH1672823.08FU	k__Fungi;p__Basidiomycota;c__Agaricomycetes;o__Sebacinales;f__Sebacinaceae;g__Sebacina;s__Sebacina_sp	UCL8_001587
22_527	HQ667845	Hexalectris_arizonica	United_States	present_in	SH1672827.08FU	k__Fungi;p__Basidiomycota;c__Agaricomycetes;o__Sebacinales;f__Sebacinaceae;g__Sebacina;s__Sebacina_sp	UCL8_001587
22_526	HQ667824	Hexalectris_colemanii	United_States	present_in	SH1672823.08FU	k__Fungi;p__Basidiomycota;c__Agaricomycetes;o__Sebacinales;f__Sebacinaceae;g__Sebacina;s__Sebacina_sp	UCL8_001587
22_528	HQ667852	Hexalectris_arizonica	United_States	present_in	SH1672827.08FU	k__Fungi;p__Basidiomycota;c__Agaricomycetes;o__Sebacinales;f__Sebacinaceae;g__Sebacina;s__Sebacina_sp	UCL8_001587
22_529	HQ667853	Hexalectris_arizonica	United_States	present_in	SH1672827.08FU	k__Fungi;p__Basidiomycota;c__Agaricomycetes;o__Sebacinales;f__Sebacinaceae;g__Sebacina;s__Sebacina_sp	UCL8_001587
22_530	HQ667861	Hexalectris_nitida	United_States	present_in	SH1672827.08FU	k__Fungi;p__Basidiomycota;c__Agaricomycetes;o__Sebacinales;f__Sebacinaceae;g__Sebacina;s__Sebacina_sp	UCL8_001587
22_531	HQ667862	Hexalectris_nitida	United_States	present_in	SH1672827.08FU	k__Fungi;p__Basidiomycota;c__Agaricomycetes;o__Sebacinales;f__Sebacinaceae;g__Sebacina;s__Sebacina_sp	UCL8_001587
22_533	GQ221636		United_States	present_in	SH1672862.08FU	k__Fungi;p__Basidiomycota;c__Agaricomycetes;o__Sebacinales;f__Sebacinaceae;g__Sebacina;s__Sebacina_sp	UCL8_001587
22_532	HQ667864	Hexalectris_nitida	United_States	present_in	SH1672827.08FU	k__Fungi;p__Basidiomycota;c__Agaricomycetes;o__Sebacinales;f__Sebacinaceae;g__Sebacina;s__Sebacina_sp	UCL8_001587
22_535	HQ667826	Hexalectris_colemanii	United_States	present_in	SH1672823.08FU	k__Fungi;p__Basidiomycota;c__Agaricomycetes;o__Sebacinales;f__Sebacinaceae;g__Sebacina;s__Sebacina_sp	UCL8_001587
22_536	HQ667833	Hexalectris_arizonica	United_States	present_in	SH1672823.08FU	k__Fungi;p__Basidiomycota;c__Agaricomycetes;o__Sebacinales;f__Sebacinaceae;g__Sebacina;s__Sebacina_sp	UCL8_001587
22_539	HQ667815	Hexalectris_grandiflora	United_States	present_in	SH1672823.08FU	k__Fungi;p__Basidiomycota;c__Agaricomycetes;o__Sebacinales;f__Sebacinaceae;g__Sebacina;s__Sebacina_sp	UCL8_001587
22_540	HQ667834	Hexalectris_arizonica	United_States	present_in	SH1672823.08FU	k__Fungi;p__Basidiomycota;c__Agaricomycetes;o__Sebacinales;f__Sebacinaceae;g__Sebacina;s__Sebacina_sp	UCL8_001587
22_541	HQ667837	Hexalectris_arizonica	United_States	present_in	SH1672823.08FU	k__Fungi;p__Basidiomycota;c__Agaricomycetes;o__Sebacinales;f__Sebacinaceae;g__Sebacina;s__Sebacina_sp	UCL8_001587
22_542	HQ667838	Hexalectris_arizonica	United_States	present_in	SH1672823.08FU	k__Fungi;p__Basidiomycota;c__Agaricomycetes;o__Sebacinales;f__Sebacinaceae;g__Sebacina;s__Sebacina_sp	UCL8_001587
22_543	HQ667840	Hexalectris_arizonica	United_States	present_in	SH1672823.08FU	k__Fungi;p__Basidiomycota;c__Agaricomycetes;o__Sebacinales;f__Sebacinaceae;g__Sebacina;s__Sebacina_sp	UCL8_001587
22_544	HQ667843	Hexalectris_arizonica	United_States	present_in	SH1672823.08FU	k__Fungi;p__Basidiomycota;c__Agaricomycetes;o__Sebacinales;f__Sebacinaceae;g__Sebacina;s__Sebacina_sp	UCL8_001587
22_548	HQ667854	Hexalectris_arizonica	United_States	duplicate_of_HQ667843|Hexalectris_arizonica|United_States	SH1672823.08FU	k__Fungi;p__Basidiomycota;c__Agaricomycetes;o__Sebacinales;f__Sebacinaceae;g__Sebacina;s__Sebacina_sp	UCL8_001587
22_545	HQ667848	Hexalectris_arizonica	United_States	present_in	SH1672823.08FU	k__Fungi;p__Basidiomycota;c__Agaricomycetes;o__Sebacinales;f__Sebacinaceae;g__Sebacina;s__Sebacina_sp	UCL8_001587
22_549	HQ667855	Hexalectris_arizonica	United_States	present_in	SH1672823.08FU	k__Fungi;p__Basidiomycota;c__Agaricomycetes;o__Sebacinales;f__Sebacinaceae;g__Sebacina;s__Sebacina_sp	UCL8_001587
22_546	HQ667849	Hexalectris_arizonica	United_States	present_in	SH1672823.08FU	k__Fungi;p__Basidiomycota;c__Agaricomycetes;o__Sebacinales;f__Sebacinaceae;g__Sebacina;s__Sebacina_sp	UCL8_001587
22_547	HQ667851	Hexalectris_arizonica	United_States	duplicate_of_HQ667849|Hexalectris_arizonica|United_States	SH1672823.08FU	k__Fungi;p__Basidiomycota;c__Agaricomycetes;o__Sebacinales;f__Sebacinaceae;g__Sebacina;s__Sebacina_sp	UCL8_001587
22_550	HQ667858	Hexalectris_arizonica	United_States	present_in	SH1672823.08FU	k__Fungi;p__Basidiomycota;c__Agaricomycetes;o__Sebacinales;f__Sebacinaceae;g__Sebacina;s__Sebacina_sp	UCL8_001587
22_551	HQ667859	Hexalectris_arizonica	United_States	present_in	SH1672823.08FU	k__Fungi;p__Basidiomycota;c__Agaricomycetes;o__Sebacinales;f__Sebacinaceae;g__Sebacina;s__Sebacina_sp	UCL8_001587
22_552	HQ667863	Hexalectris_nitida	United_States	present_in	SH1672823.08FU	k__Fungi;p__Basidiomycota;c__Agaricomycetes;o__Sebacinales;f__Sebacinaceae;g__Sebacina;s__Sebacina_sp	UCL8_001587
22_553	HQ667865	Hexalectris_nitida	United_States	present_in	SH1672823.08FU	k__Fungi;p__Basidiomycota;c__Agaricomycetes;o__Sebacinales;f__Sebacinaceae;g__Sebacina;s__Sebacina_sp	UCL8_001587
22_554	HQ667867	Hexalectris_nitida	United_States	present_in	SH1672823.08FU	k__Fungi;p__Basidiomycota;c__Agaricomycetes;o__Sebacinales;f__Sebacinaceae;g__Sebacina;s__Sebacina_sp	UCL8_001587
22_555	HQ667868	Hexalectris_nitida	United_States	present_in	SH1672823.08FU	k__Fungi;p__Basidiomycota;c__Agaricomycetes;o__Sebacinales;f__Sebacinaceae;g__Sebacina;s__Sebacina_sp	UCL8_001587
22_557	HQ667877	Hexalectris_spicata	United_States	present_in	SH1672823.08FU	k__Fungi;p__Basidiomycota;c__Agaricomycetes;o__Sebacinales;f__Sebacinaceae;g__Sebacina;s__Sebacina_sp	UCL8_001587
22_556	HQ667876	Hexalectris_spicata	United_States	present_in	SH1672823.08FU	k__Fungi;p__Basidiomycota;c__Agaricomycetes;o__Sebacinales;f__Sebacinaceae;g__Sebacina;s__Sebacina_sp	UCL8_001587
22_558	Sebacina__KC965842		United_States	present_in	SH1672823.08FU	k__Fungi;p__Basidiomycota;c__Agaricomycetes;o__Sebacinales;f__Sebacinaceae;g__Sebacina;s__Sebacina_sp	UCL8_001587
22_559	HQ667814	Hexalectris_grandiflora	United_States	present_in	SH1672867.08FU	k__Fungi;p__Basidiomycota;c__Agaricomycetes;o__Sebacinales;f__Sebacinaceae;g__Sebacina;s__Sebacina_sp	UCL8_001587
22_561	HQ667856	Hexalectris_arizonica	United_States	present_in	SH1672823.08FU	k__Fungi;p__Basidiomycota;c__Agaricomycetes;o__Sebacinales;f__Sebacinaceae;g__Sebacina;s__Sebacina_sp	UCL8_001587
22_560	HQ667835	Hexalectris_arizonica	United_States	present_in	SH1672823.08FU	k__Fungi;p__Basidiomycota;c__Agaricomycetes;o__Sebacinales;f__Sebacinaceae;g__Sebacina;s__Sebacina_sp	UCL8_001587
22_563	HQ667857	Hexalectris_arizonica	United_States	present_in	SH1672823.08FU	k__Fungi;p__Basidiomycota;c__Agaricomycetes;o__Sebacinales;f__Sebacinaceae;g__Sebacina;s__Sebacina_sp	UCL8_001587
22_562	JX630363	Salix_arctica	United_States	present_in	SH1672823.08FU	k__Fungi;p__Basidiomycota;c__Agaricomycetes;o__Sebacinales;f__Sebacinaceae;g__Sebacina;s__Sebacina_sp	UCL8_001587
22_564	HQ667827	Hexalectris_colemanii	United_States	present_in	SH1672823.08FU	k__Fungi;p__Basidiomycota;c__Agaricomycetes;o__Sebacinales;f__Sebacinaceae;g__Sebacina;s__Sebacina_sp	UCL8_001587
22_574	Sebacina__GU328531		United_States	present_in	SH1672875.08FU	k__Fungi;p__Basidiomycota;c__Agaricomycetes;o__Sebacinales;f__Sebacinaceae;g__Sebacina;s__Sebacina_sp	UCL8_001587
22_579	Sebacina__MG761403	Pinus_ponderosa	United_States	present_in	SH1731048.08FU	k__Fungi;p__Basidiomycota;c__Agaricomycetes;o__Sebacinales;f__Sebacinaceae;g__Sebacina;s__Sebacina_sp	UCL8_007582
22_593	HQ667895	Hexalectris_spicata	United_States	present_in	SH1731004.08FU	k__Fungi;p__Basidiomycota;c__Agaricomycetes;o__Sebacinales;f__Sebacinaceae;g__Sebacina;s__Sebacina_sp	UCL8_007582
22_603	JX630335	Salix_arctica	United_States	present_in	SH1731004.08FU	k__Fungi;p__Basidiomycota;c__Agaricomycetes;o__Sebacinales;f__Sebacinaceae;g__Sebacina;s__Sebacina_sp	UCL8_007582
22_611	Sebacina__KC965251		United_States	duplicate_of_JX630335|Salix_arctica|United_States	SH1731004.08FU	k__Fungi;p__Basidiomycota;c__Agaricomycetes;o__Sebacinales;f__Sebacinaceae;g__Sebacina;s__Sebacina_sp	UCL8_007582
22_643	JQ393120		United_States	present_in	SH1672830.08FU	k__Fungi;p__Basidiomycota;c__Agaricomycetes;o__Sebacinales;f__Sebacinaceae;g__Sebacina;s__Sebacina_sp	UCL8_001587
22_663	Sebacina__AY702802__sample	Abies	United_States	present_in	SH1731032.08FU	k__Fungi;p__Basidiomycota;c__Agaricomycetes;o__Sebacinales;f__Sebacinaceae;g__Sebacina;s__Sebacina_sp	UCL8_007582
22_674	EF619766	Pinus_taeda	United_States	present_in	SH1731032.08FU	k__Fungi;p__Basidiomycota;c__Agaricomycetes;o__Sebacinales;f__Sebacinaceae;g__Sebacina;s__Sebacina_sp	UCL8_007582
22_673	AY296259	Pinus_taeda	United_States	present_in	SH1731032.08FU	k__Fungi;p__Basidiomycota;c__Agaricomycetes;o__Sebacinales;f__Sebacinaceae;g__Sebacina;s__Sebacina_sp	UCL8_007582
22_693	Sebacina__AY969889		United_States	present_in	SH1731154.08FU	k__Fungi;p__Basidiomycota;c__Agaricomycetes;o__Sebacinales;f__Sebacinaceae;g__Sebacina;s__Sebacina_sp	UCL8_007582
22_701	HQ667842	Hexalectris_arizonica	United_States	present_in	SH1682238.08FU	k__Fungi;p__Basidiomycota;c__Agaricomycetes;o__Sebacinales;f__Sebacinaceae;g__Sebacina;s__Sebacina_sp	UCL8_003407
22_707	DQ273403	Lithocarpus_densiflorus	United_States	present_in	SH1672857.08FU	k__Fungi;p__Basidiomycota;c__Agaricomycetes;o__Sebacinales;f__Sebacinaceae;g__Sebacina;s__Sebacina_sp	UCL8_001587
22_715	KU176295		United_States	present_in	SH1744127.08FU	k__Fungi;p__Basidiomycota;c__Agaricomycetes;o__Sebacinales;f__Sebacinaceae;g__Sebacina;s__Sebacina_sp	UCL8_008621
22_717	JQ393119		United_States	present_in	SH1800261.08FU	k__Fungi;p__Basidiomycota;c__Agaricomycetes;o__Sebacinales;f__Sebacinaceae;g__Sebacina;s__Sebacina_sp	UCL8_010859
22_789	HQ667898	Hexalectris_spicata	United_States	present_in	SH1731013.08FU	k__Fungi;p__Basidiomycota;c__Agaricomycetes;o__Sebacinales;f__Sebacinaceae;g__Sebacina;s__Sebacina_sp	UCL8_007582
22_795	HQ667915	Hexalectris_spicata	United_States	duplicate_of_HQ667898|Hexalectris_spicata|United_States	SH1731013.08FU	k__Fungi;p__Basidiomycota;c__Agaricomycetes;o__Sebacinales;f__Sebacinaceae;g__Sebacina;s__Sebacina_sp	UCL8_007582
22_796	HQ667917	Hexalectris_spicata	United_States	duplicate_of_HQ667898|Hexalectris_spicata|United_States	SH1731013.08FU	k__Fungi;p__Basidiomycota;c__Agaricomycetes;o__Sebacinales;f__Sebacinaceae;g__Sebacina;s__Sebacina_sp	UCL8_007582
22_797	HQ667919	Hexalectris_spicata	United_States	duplicate_of_HQ667898|Hexalectris_spicata|United_States	SH1731013.08FU	k__Fungi;p__Basidiomycota;c__Agaricomycetes;o__Sebacinales;f__Sebacinaceae;g__Sebacina;s__Sebacina_sp	UCL8_007582
22_798	HQ667921	Hexalectris_spicata	United_States	duplicate_of_HQ667898|Hexalectris_spicata|United_States	SH1731013.08FU	k__Fungi;p__Basidiomycota;c__Agaricomycetes;o__Sebacinales;f__Sebacinaceae;g__Sebacina;s__Sebacina_sp	UCL8_007582
22_799	JX630714	Dryas_integrifolia	United_States	duplicate_of_HQ667898|Hexalectris_spicata|United_States	SH1731013.08FU	k__Fungi;p__Basidiomycota;c__Agaricomycetes;o__Sebacinales;f__Sebacinaceae;g__Sebacina;s__Sebacina_sp	UCL8_007582
22_790	HQ667901	Hexalectris_spicata	United_States	present_in	SH1731013.08FU	k__Fungi;p__Basidiomycota;c__Agaricomycetes;o__Sebacinales;f__Sebacinaceae;g__Sebacina;s__Sebacina_sp	UCL8_007582
22_791	HQ667902	Hexalectris_spicata	United_States	present_in	SH1731013.08FU	k__Fungi;p__Basidiomycota;c__Agaricomycetes;o__Sebacinales;f__Sebacinaceae;g__Sebacina;s__Sebacina_sp	UCL8_007582
22_792	HQ667908	Hexalectris_spicata	United_States	present_in	SH1731013.08FU	k__Fungi;p__Basidiomycota;c__Agaricomycetes;o__Sebacinales;f__Sebacinaceae;g__Sebacina;s__Sebacina_sp	UCL8_007582
22_793	HQ667912	Hexalectris_spicata	United_States	duplicate_of_HQ667908|Hexalectris_spicata|United_States	SH1731013.08FU	k__Fungi;p__Basidiomycota;c__Agaricomycetes;o__Sebacinales;f__Sebacinaceae;g__Sebacina;s__Sebacina_sp	UCL8_007582
22_794	HQ667913	Hexalectris_spicata	United_States	present_in	SH1731013.08FU	k__Fungi;p__Basidiomycota;c__Agaricomycetes;o__Sebacinales;f__Sebacinaceae;g__Sebacina;s__Sebacina_sp	UCL8_007582
22_827	Sebacina__HM057202	Quercus_rubra	United_States	present_in	SH1731068.08FU	k__Fungi;p__Basidiomycota;c__Agaricomycetes;o__Sebacinales;f__Sebacinaceae;g__Sebacina;s__Sebacina_sp	UCL8_007582
22_836	MK607476		United_States	present_in	SH2760124.08FU	k__Fungi;p__Basidiomycota;c__Agaricomycetes;o__Sebacinales;f__Sebacinaceae;g__Sebacina;s__Sebacina_sp	UCL8_007582
22_860	Sebacina__GU907802	Quercus_rubra	United_States	present_in	SH1731116.08FU	k__Fungi;p__Basidiomycota;c__Agaricomycetes;o__Sebacinales;f__Sebacinaceae;g__Sebacina;s__Sebacina_sp	UCL8_007582
22_862	AY243532	Hexalectris_revoluta	United_States	present_in	SH1731207.08FU	k__Fungi;p__Basidiomycota;c__Agaricomycetes;o__Sebacinales;f__Sebacinaceae;g__Sebacina;s__Sebacina_sp	UCL8_007582
22_987	KU176296		United_States	present_in	SH1731260.08FU	k__Fungi;p__Basidiomycota;c__Agaricomycetes;o__Sebacinales;f__Sebacinaceae;g__Sebacina;s__Sebacina_sp	UCL8_007582
22_997	KT275675	Salix_sp.	United_States	present_in	SH1800263.08FU	k__Fungi;p__Basidiomycota;c__Agaricomycetes;o__Sebacinales;f__Sebacinaceae;g__Sebacina;s__Sebacina_sp	UCL8_010859
22_1013	JX630699	Dryas_integrifolia	United_States	present_in	SH1672847.08FU	k__Fungi;p__Basidiomycota;c__Agaricomycetes;o__Sebacinales;f__Sebacinaceae;g__Sebacina;s__Sebacina_sp	UCL8_001587
22_1025	GQ221627		United_States	present_in	SH1682236.08FU	k__Fungi;p__Basidiomycota;c__Agaricomycetes;o__Sebacinales;f__Sebacinaceae;g__Sebacina;s__Sebacina_sp	UCL8_003407
22_1028	KU176293		United_States	present_in	SH1744109.08FU	k__Fungi;p__Basidiomycota;c__Agaricomycetes;o__Sebacinales;f__Sebacinaceae;g__Sebacina;s__Sebacina_sp	UCL8_008621
22_1046	HQ667880	Hexalectris_spicata	United_States	present_in	SH1731087.08FU	k__Fungi;p__Basidiomycota;c__Agaricomycetes;o__Sebacinales;f__Sebacinaceae;g__Sebacina;s__Sebacina_sp	UCL8_007582
22_1045	KT275621	Salix_sp.	United_States	present_in	SH1682254.08FU	k__Fungi;p__Basidiomycota;c__Agaricomycetes;o__Sebacinales;f__Sebacinaceae;g__Sebacina;s__Sebacina_sp	UCL8_003407
22_1101	JX630485	Dryas_integrifolia	United_States	present_in	SH1672827.08FU	k__Fungi;p__Basidiomycota;c__Agaricomycetes;o__Sebacinales;f__Sebacinaceae;g__Sebacina;s__Sebacina_sp	UCL8_001587
22_1113	JX630470	Dryas_integrifolia	United_States	present_in	SH1731315.08FU	k__Fungi;p__Basidiomycota;c__Agaricomycetes;o__Sebacinales;f__Sebacinaceae;g__Sebacina;s__Sebacina_sp	UCL8_007582
22_1127	Sebacina__GU366745		United_States	present_in	SH1672879.08FU	k__Fungi;p__Basidiomycota;c__Agaricomycetes;o__Sebacinales;f__Sebacinaceae;g__Sebacina;s__Sebacina_sp	UCL8_001587
22_1143	Sebacina__JN593362		United_States	present_in	SH1731099.08FU	k__Fungi;p__Basidiomycota;c__Agaricomycetes;o__Sebacinales;f__Sebacinaceae;g__Sebacina;s__Sebacina_sp	UCL8_007582
22_15	Sebacina__JN197942		Unspecified	present_in	SH1731008.08FU	k__Fungi;p__Basidiomycota;c__Agaricomycetes;o__Sebacinales;f__Sebacinaceae;g__Sebacina;s__Sebacina_sp	UCL8_007582
22_330	Sebacina__MK737473		Unspecified	present_in	SH1731087.08FU	k__Fungi;p__Basidiomycota;c__Agaricomycetes;o__Sebacinales;f__Sebacinaceae;g__Sebacina;s__Sebacina_sp	UCL8_007582
22_361	Sebacina__JN198112		Unspecified	present_in	SH1731101.08FU	k__Fungi;p__Basidiomycota;c__Agaricomycetes;o__Sebacinales;f__Sebacinaceae;g__Sebacina;s__Sebacina_sp	UCL8_007582
22_380	Sebacina__HE820318		Unspecified	present_in	SH1731022.08FU	k__Fungi;p__Basidiomycota;c__Agaricomycetes;o__Sebacinales;f__Sebacinaceae;g__Sebacina;s__Sebacina_sp	UCL8_007582
22_387	KY446844	Bistorta_vivipara	Unspecified	present_in	SH1682200.08FU	k__Fungi;p__Basidiomycota;c__Agaricomycetes;o__Sebacinales;f__Sebacinaceae;g__Sebacina;s__Sebacina_sp	UCL8_003407
22_388	KY446849	Bistorta_vivipara	Unspecified	duplicate_of_KY446844|Bistorta_vivipara|Unspecified	SH1682200.08FU	k__Fungi;p__Basidiomycota;c__Agaricomycetes;o__Sebacinales;f__Sebacinaceae;g__Sebacina;s__Sebacina_sp	UCL8_003407
22_389	KY446850	Bistorta_vivipara	Unspecified	duplicate_of_KY446844|Bistorta_vivipara|Unspecified	SH1682200.08FU	k__Fungi;p__Basidiomycota;c__Agaricomycetes;o__Sebacinales;f__Sebacinaceae;g__Sebacina;s__Sebacina_sp	UCL8_003407
22_390	KY446851	Bistorta_vivipara	Unspecified	duplicate_of_KY446844|Bistorta_vivipara|Unspecified	SH1682200.08FU	k__Fungi;p__Basidiomycota;c__Agaricomycetes;o__Sebacinales;f__Sebacinaceae;g__Sebacina;s__Sebacina_sp	UCL8_003407
22_391	KY446852	Bistorta_vivipara	Unspecified	present_in	SH1682200.08FU	k__Fungi;p__Basidiomycota;c__Agaricomycetes;o__Sebacinales;f__Sebacinaceae;g__Sebacina;s__Sebacina_sp	UCL8_003407
22_427	Sebacina__JQ975981__sample	Pinus_pinaster	Unspecified	present_in	SH1731304.08FU	k__Fungi;p__Basidiomycota;c__Agaricomycetes;o__Sebacinales;f__Sebacinaceae;g__Sebacina;s__Sebacina_sp	UCL8_007582
22_439	MN540271	Vitis_vinifera_subsp._sylvestris	Unspecified	present_in	SH1731002.08FU	k__Fungi;p__Basidiomycota;c__Agaricomycetes;o__Sebacinales;f__Sebacinaceae;g__Sebacina;s__Sebacina_sp	UCL8_007582
22_509	Sebacina__HE820585		Unspecified	present_in	SH1731060.08FU	k__Fungi;p__Basidiomycota;c__Agaricomycetes;o__Sebacinales;f__Sebacinaceae;g__Sebacina;s__Sebacina_sp	UCL8_007582
22_587	Sebacina__JN198081		Unspecified	present_in	SH1731004.08FU	k__Fungi;p__Basidiomycota;c__Agaricomycetes;o__Sebacinales;f__Sebacinaceae;g__Sebacina;s__Sebacina_sp	UCL8_007582
22_764	Sebacina__HE820526		Unspecified	present_in	SH1731003.08FU	k__Fungi;p__Basidiomycota;c__Agaricomycetes;o__Sebacinales;f__Sebacinaceae;g__Sebacina;s__Sebacina_sp	UCL8_007582
22_774	KC707767		Unspecified	duplicate_of_GQ985424|Pinus_tabulaeformis|China	SH1731058.08FU	k__Fungi;p__Basidiomycota;c__Agaricomycetes;o__Sebacinales;f__Sebacinaceae;g__Sebacina;s__Sebacina_sp	UCL8_007582
22_775	KJ150608	Quercus_mongolica	Unspecified	duplicate_of_GQ985424|Pinus_tabulaeformis|China	SH1731058.08FU	k__Fungi;p__Basidiomycota;c__Agaricomycetes;o__Sebacinales;f__Sebacinaceae;g__Sebacina;s__Sebacina_sp	UCL8_007582
22_808	Sebacina__KX816197		Unspecified	present_in	SH1731013.08FU	k__Fungi;p__Basidiomycota;c__Agaricomycetes;o__Sebacinales;f__Sebacinaceae;g__Sebacina;s__Sebacina_sp	UCL8_007582
22_821	KY774275		Unspecified	present_in	SH1731204.08FU	k__Fungi;p__Basidiomycota;c__Agaricomycetes;o__Sebacinales;f__Sebacinaceae;g__Sebacina;s__Sebacina_sp	UCL8_007582
22_822	Sebacina__HE820496		Unspecified	present_in	SH1731068.08FU	k__Fungi;p__Basidiomycota;c__Agaricomycetes;o__Sebacinales;f__Sebacinaceae;g__Sebacina;s__Sebacina_sp	UCL8_007582
22_824	Sebacina__HE820497		Unspecified	present_in	SH1731068.08FU	k__Fungi;p__Basidiomycota;c__Agaricomycetes;o__Sebacinales;f__Sebacinaceae;g__Sebacina;s__Sebacina_sp	UCL8_007582
22_826	Sebacina__HE820443		Unspecified	present_in	SH1731068.08FU	k__Fungi;p__Basidiomycota;c__Agaricomycetes;o__Sebacinales;f__Sebacinaceae;g__Sebacina;s__Sebacina_sp	UCL8_007582
22_861	Sebacina__HE820420		Unspecified	present_in	SH1731118.08FU	k__Fungi;p__Basidiomycota;c__Agaricomycetes;o__Sebacinales;f__Sebacinaceae;g__Sebacina;s__Sebacina_sp	UCL8_007582
22_903	KY446847	Bistorta_vivipara	Unspecified	present_in	SH1682199.08FU	k__Fungi;p__Basidiomycota;c__Agaricomycetes;o__Sebacinales;f__Sebacinaceae;g__Sebacina;s__Sebacina_sp	UCL8_003407
22_904	KY446848	Bistorta_vivipara	Unspecified	duplicate_of_KY446847|Bistorta_vivipara|Unspecified	SH1682199.08FU	k__Fungi;p__Basidiomycota;c__Agaricomycetes;o__Sebacinales;f__Sebacinaceae;g__Sebacina;s__Sebacina_sp	UCL8_003407
22_919	KY446845	Bistorta_vivipara	Unspecified	present_in	SH1682199.08FU	k__Fungi;p__Basidiomycota;c__Agaricomycetes;o__Sebacinales;f__Sebacinaceae;g__Sebacina;s__Sebacina_sp	UCL8_003407
22_920	KY446846	Bistorta_vivipara	Unspecified	duplicate_of_KY446845|Bistorta_vivipara|Unspecified	SH1682199.08FU	k__Fungi;p__Basidiomycota;c__Agaricomycetes;o__Sebacinales;f__Sebacinaceae;g__Sebacina;s__Sebacina_sp	UCL8_003407
22_961	JQ665532		Unspecified	present_in	SH1800252.08FU	k__Fungi;p__Basidiomycota;c__Agaricomycetes;o__Sebacinales;f__Sebacinaceae;g__Sebacina;s__Sebacina_sp	UCL8_010859
22_963	JQ665534		Unspecified	duplicate_of_JQ665532||Unspecified	SH1800252.08FU	k__Fungi;p__Basidiomycota;c__Agaricomycetes;o__Sebacinales;f__Sebacinaceae;g__Sebacina;s__Sebacina_sp	UCL8_010859
22_986	Sebacina__HE820557		Unspecified	present_in	SH1731233.08FU	k__Fungi;p__Basidiomycota;c__Agaricomycetes;o__Sebacinales;f__Sebacinaceae;g__Sebacina;s__Sebacina_sp	UCL8_007582
22_989	Sebacina__HE820597		Unspecified	present_in	SH1731232.08FU	k__Fungi;p__Basidiomycota;c__Agaricomycetes;o__Sebacinales;f__Sebacinaceae;g__Sebacina;s__Sebacina_sp	UCL8_007582
22_1005	HQ330994	Orchis_italica	Unspecified	present_in	SH1672832.08FU	k__Fungi;p__Basidiomycota;c__Agaricomycetes;o__Sebacinales;f__Sebacinaceae;g__Sebacina;s__Sebacina_sp	UCL8_001587
22_1038	MG018075		Unspecified	present_in	SH1731163.08FU	k__Fungi;p__Basidiomycota;c__Agaricomycetes;o__Sebacinales;f__Sebacinaceae;g__Sebacina;s__Sebacina_sp	UCL8_007582
22_1140	MK431006		Unspecified	present_in	SH2761161.08FU	k__Fungi;p__Basidiomycota;c__Agaricomycetes;o__Sebacinales;f__Sebacinaceae;g__Sebacina;s__Sebacina_sp	UCL8_003407
22_1146	Sebacina__KM594864	Oreomunnea_mexicana	Unspecified	present_in	SH1682283.08FU	k__Fungi;p__Basidiomycota;c__Agaricomycetes;o__Sebacinales;f__Sebacinaceae;g__Sebacina;s__Sebacina_sp	UCL8_003407
22_1162	KF476916		Unspecified	present_in	SH1731149.08FU	k__Fungi;p__Basidiomycota;c__Agaricomycetes;o__Sebacinales;f__Sebacinaceae;g__Sebacina;s__Sebacina_sp	UCL8_007582
22_83	Sebacina__UDB034300__Achroot			present_in	SH1800270.08FU	k__Fungi;p__Basidiomycota;c__Agaricomycetes;o__Sebacinales;f__Sebacinaceae;g__Sebacina;s__Sebacina_sp	UCL8_010859
22_111	Sebacina__UDB007817			present_in	SH1731162.08FU	k__Fungi;p__Basidiomycota;c__Agaricomycetes;o__Sebacinales;f__Sebacinaceae;g__Sebacina;s__Sebacina_sp	UCL8_007582
22_129	Sebacina__UDB004373__sample			present_in	SH1731164.08FU	k__Fungi;p__Basidiomycota;c__Agaricomycetes;o__Sebacinales;f__Sebacinaceae;g__Sebacina;s__Sebacina_sp	UCL8_007582
22_323	Sebacina__UDB034260__Achroot			present_in	SH1731001.08FU	k__Fungi;p__Basidiomycota;c__Agaricomycetes;o__Sebacinales;f__Sebacinaceae;g__Sebacina;s__Sebacina_sp	UCL8_007582
22_324	Sebacina__UDB034265__Achroot			duplicate_of_Sebacina__UDB034260__Achroot||	SH1731001.08FU	k__Fungi;p__Basidiomycota;c__Agaricomycetes;o__Sebacinales;f__Sebacinaceae;g__Sebacina;s__Sebacina_sp	UCL8_007582
22_408	Sebacina__UDB017189__sample			present_in	SH1731002.08FU	k__Fungi;p__Basidiomycota;c__Agaricomycetes;o__Sebacinales;f__Sebacinaceae;g__Sebacina;s__Sebacina_sp	UCL8_007582
22_417	Sebacina_dimitica__UDB0754291__TU114835			present_in	SH1731002.08FU	k__Fungi;p__Basidiomycota;c__Agaricomycetes;o__Sebacinales;f__Sebacinaceae;g__Sebacina;s__Sebacina_sp	UCL8_007582
22_500	Sebacina__UDB034278__Achroot			present_in	SH1731037.08FU	k__Fungi;p__Basidiomycota;c__Agaricomycetes;o__Sebacinales;f__Sebacinaceae;g__Sebacina;s__Sebacina_sp	UCL8_007582
22_510	Sebacina__UDB004633__sample			present_in	SH1731106.08FU	k__Fungi;p__Basidiomycota;c__Agaricomycetes;o__Sebacinales;f__Sebacinaceae;g__Sebacina;s__Sebacina_sp	UCL8_007582
22_567	Sebacina_epigaea__UDB0754292__TU114836			present_in	SH1672831.08FU	k__Fungi;p__Basidiomycota;c__Agaricomycetes;o__Sebacinales;f__Sebacinaceae;g__Sebacina;s__Sebacina_sp	UCL8_001587
22_582	Sebacina__UDB034313__Achroot			duplicate_of_Sebacina__UDB025900__Pyrola_rotundifolia_sample|Pyrola_rotundifolia|Estonia	SH1731004.08FU	k__Fungi;p__Basidiomycota;c__Agaricomycetes;o__Sebacinales;f__Sebacinaceae;g__Sebacina;s__Sebacina_sp	UCL8_007582
22_589	Sebacina__UDB017182__sample			duplicate_of_Sebacina__JN198081||Unspecified	SH1731004.08FU	k__Fungi;p__Basidiomycota;c__Agaricomycetes;o__Sebacinales;f__Sebacinaceae;g__Sebacina;s__Sebacina_sp	UCL8_007582
22_670	Sebacina__UDB017181__sample			present_in	SH1731015.08FU	k__Fungi;p__Basidiomycota;c__Agaricomycetes;o__Sebacinales;f__Sebacinaceae;g__Sebacina;s__Sebacina_sp	UCL8_007582
22_681	3819Pol_viv_B7			present_in	SH1731015.08FU	k__Fungi;p__Basidiomycota;c__Agaricomycetes;o__Sebacinales;f__Sebacinaceae;g__Sebacina;s__Sebacina_sp	UCL8_007582
22_770	Sebacina__UDB017195__sample			present_in	SH1731013.08FU	k__Fungi;p__Basidiomycota;c__Agaricomycetes;o__Sebacinales;f__Sebacinaceae;g__Sebacina;s__Sebacina_sp	UCL8_007582
22_819	Sebacina__UDB017185__sample			present_in	SH1682240.08FU	k__Fungi;p__Basidiomycota;c__Agaricomycetes;o__Sebacinales;f__Sebacinaceae;g__Sebacina;s__Sebacina_sp	UCL8_003407
22_864	Sebacina__UDB004548__sample			present_in	SH1731208.08FU	k__Fungi;p__Basidiomycota;c__Agaricomycetes;o__Sebacinales;f__Sebacinaceae;g__Sebacina;s__Sebacina_sp	UCL8_007582
22_900	Sebacina__UDB007814			present_in	SH1731078.08FU	k__Fungi;p__Basidiomycota;c__Agaricomycetes;o__Sebacinales;f__Sebacinaceae;g__Sebacina;s__Sebacina_sp	UCL8_007582
22_952	Sebacina__UDB0778591__TU116975			present_in	SH1800252.08FU	k__Fungi;p__Basidiomycota;c__Agaricomycetes;o__Sebacinales;f__Sebacinaceae;g__Sebacina;s__Sebacina_sp	UCL8_010859
22_953	Sebacina__UDB0778603__TU116986			present_in	SH1800252.08FU	k__Fungi;p__Basidiomycota;c__Agaricomycetes;o__Sebacinales;f__Sebacinaceae;g__Sebacina;s__Sebacina_sp	UCL8_010859
22_956	Sebacina__UDB0778626__TU127012			present_in	SH1800252.08FU	k__Fungi;p__Basidiomycota;c__Agaricomycetes;o__Sebacinales;f__Sebacinaceae;g__Sebacina;s__Sebacina_sp	UCL8_010859
22_990	Sebacina__UDB004460__sample			present_in	SH1731230.08FU	k__Fungi;p__Basidiomycota;c__Agaricomycetes;o__Sebacinales;f__Sebacinaceae;g__Sebacina;s__Sebacina_sp	UCL8_007582
22_998	Sebacina__UDB007819__sample			present_in	SH1682241.08FU	k__Fungi;p__Basidiomycota;c__Agaricomycetes;o__Sebacinales;f__Sebacinaceae;g__Sebacina;s__Sebacina_sp	UCL8_003407
22_1115	Sebacina__UDB017183__sample			duplicate_of_AJ893256|Betula_pendula|Estonia	SH1731089.08FU	k__Fungi;p__Basidiomycota;c__Agaricomycetes;o__Sebacinales;f__Sebacinaceae;g__Sebacina;s__Sebacina_sp	UCL8_007582
22_115	KY684566	Quercus_sp.	China	present_in	SH1731223.08FU	k__Fungi;p__Basidiomycota;c__Agaricomycetes;o__Sebacinales;f__Sebacinaceae;g__unidentified;s__Sebacinaceae_sp	UCL8_007582
22_578	KY856781	Larix_gmelinii	China	present_in	SH1750390.08FU	k__Fungi;p__Basidiomycota;c__Agaricomycetes;o__Sebacinales;f__Sebacinaceae;g__unidentified;s__Sebacinaceae_sp	UCL8_009172
22_1012	KY684557	Quercus_sp.	China	present_in	SH1731286.08FU	k__Fungi;p__Basidiomycota;c__Agaricomycetes;o__Sebacinales;f__Sebacinaceae;g__unidentified;s__Sebacinaceae_sp	UCL8_007582
22_1102	KY684560	Quercus_sp.	China	present_in	SH1675919.08FU	k__Fungi;p__Basidiomycota;c__Agaricomycetes;o__Sebacinales;f__Sebacinaceae;g__unidentified;s__Sebacinaceae_sp	UCL8_002190
22_612	KY574381		Mexico	present_in	SH1731335.08FU	k__Fungi;p__Basidiomycota;c__Agaricomycetes;o__Sebacinales;f__Sebacinaceae;g__unidentified;s__Sebacinaceae_sp	UCL8_007582
22_830	KY574386		Mexico	present_in	SH1731282.08FU	k__Fungi;p__Basidiomycota;c__Agaricomycetes;o__Sebacinales;f__Sebacinaceae;g__unidentified;s__Sebacinaceae_sp	UCL8_007582
22_1019	MG720474	Picea_abies	Serbia	present_in	SH2761784.08FU	k__Fungi;p__Basidiomycota;c__Agaricomycetes;o__Sebacinales;f__Sebacinaceae;g__unidentified;s__Sebacinaceae_sp	UCL8_001587
22_82	HQ211970		United_States	present_in	SH1750293.08FU	k__Fungi;p__Basidiomycota;c__Agaricomycetes;o__Sebacinales;f__Sebacinaceae;g__unidentified;s__Sebacinaceae_sp	UCL8_009172
22_867	KX389131		United_States	present_in	SH1800283.08FU	k__Fungi;p__Basidiomycota;c__Agaricomycetes;o__Sebacinales;f__Sebacinaceae;g__unidentified;s__Sebacinaceae_sp	UCL8_010859
22_651	KY346537	Cypripedium_bardolphianum	Unspecified	present_in	SH1672863.08FU	k__Fungi;p__Basidiomycota;c__Agaricomycetes;o__Sebacinales;f__Sebacinaceae;g__unidentified;s__Sebacinaceae_sp	UCL8_001587
22_144	KJ188465	Neottia_ovata	Czechia	present_in	SH1723664.08FU	k__Fungi;p__Basidiomycota;c__Agaricomycetes;o__Sebacinales;f__Serendipitaceae;g__Serendipita;s__Serendipita_herbamans	UCL8_007058
22_145	KJ188496	Neottia_ovata	Czechia	present_in	SH1723664.08FU	k__Fungi;p__Basidiomycota;c__Agaricomycetes;o__Sebacinales;f__Serendipitaceae;g__Serendipita;s__Serendipita_herbamans	UCL8_007058
22_287	KJ188474	Neottia_ovata	Czechia	present_in	SH1723664.08FU	k__Fungi;p__Basidiomycota;c__Agaricomycetes;o__Sebacinales;f__Serendipitaceae;g__Serendipita;s__Serendipita_herbamans	UCL8_007058
22_290	KJ188547	Neottia_ovata	Czechia	present_in	SH1723664.08FU	k__Fungi;p__Basidiomycota;c__Agaricomycetes;o__Sebacinales;f__Serendipitaceae;g__Serendipita;s__Serendipita_herbamans	UCL8_007058
22_141	KF779475	Hordeum_vulgare	Germany	present_in	SH1723664.08FU	k__Fungi;p__Basidiomycota;c__Agaricomycetes;o__Sebacinales;f__Serendipitaceae;g__Serendipita;s__Serendipita_herbamans	UCL8_007058
22_149	HQ154268	Trifolium_pratense	Germany	present_in	SH1723664.08FU	k__Fungi;p__Basidiomycota;c__Agaricomycetes;o__Sebacinales;f__Serendipitaceae;g__Serendipita;s__Serendipita_herbamans	UCL8_007058
22_156	EU910907	Medicago_lupulina	Germany	present_in	SH1723664.08FU	k__Fungi;p__Basidiomycota;c__Agaricomycetes;o__Sebacinales;f__Serendipitaceae;g__Serendipita;s__Serendipita_herbamans	UCL8_007058
22_204	HQ154293	Gentianopsis_ciliata	Germany	duplicate_of_EU910913|Vicia_cracca|Unspecified	SH1723664.08FU	k__Fungi;p__Basidiomycota;c__Agaricomycetes;o__Sebacinales;f__Serendipitaceae;g__Serendipita;s__Serendipita_herbamans	UCL8_007058
22_160	EU910917	Vicia_cracca	Germany	duplicate_of_EU910915|Vicia_cracca|Unspecified	SH1723664.08FU	k__Fungi;p__Basidiomycota;c__Agaricomycetes;o__Sebacinales;f__Serendipitaceae;g__Serendipita;s__Serendipita_herbamans	UCL8_007058
22_161	EU910918	Vicia_cracca	Germany	duplicate_of_EU910915|Vicia_cracca|Unspecified	SH1723664.08FU	k__Fungi;p__Basidiomycota;c__Agaricomycetes;o__Sebacinales;f__Serendipitaceae;g__Serendipita;s__Serendipita_herbamans	UCL8_007058
22_208	HQ154378	Trifolium_badium	Germany	duplicate_of_EU910915|Vicia_cracca|Unspecified	SH1723664.08FU	k__Fungi;p__Basidiomycota;c__Agaricomycetes;o__Sebacinales;f__Serendipitaceae;g__Serendipita;s__Serendipita_herbamans	UCL8_007058
22_292	Serendipita__AJ875396	Phragmites_australis	Germany	duplicate_of_EU910915|Vicia_cracca|Unspecified	SH1723664.08FU	k__Fungi;p__Basidiomycota;c__Agaricomycetes;o__Sebacinales;f__Serendipitaceae;g__Serendipita;s__Serendipita_herbamans	UCL8_007058
22_189	HQ154224	Homogyne_alpina	Germany	duplicate_of_GU189715|Triticum_aestivum_TUB_019245|Unspecified	SH1723664.08FU	k__Fungi;p__Basidiomycota;c__Agaricomycetes;o__Sebacinales;f__Serendipitaceae;g__Serendipita;s__Serendipita_herbamans	UCL8_007058
22_194	HQ154243	Bistorta_officinalis	Germany	duplicate_of_GU189715|Triticum_aestivum_TUB_019245|Unspecified	SH1723664.08FU	k__Fungi;p__Basidiomycota;c__Agaricomycetes;o__Sebacinales;f__Serendipitaceae;g__Serendipita;s__Serendipita_herbamans	UCL8_007058
22_201	HQ154259	Trifolium_pratense	Germany	duplicate_of_GU189715|Triticum_aestivum_TUB_019245|Unspecified	SH1723664.08FU	k__Fungi;p__Basidiomycota;c__Agaricomycetes;o__Sebacinales;f__Serendipitaceae;g__Serendipita;s__Serendipita_herbamans	UCL8_007058
22_211	HQ154383	Trifolium_repens	Germany	duplicate_of_GU189715|Triticum_aestivum_TUB_019245|Unspecified	SH1723664.08FU	k__Fungi;p__Basidiomycota;c__Agaricomycetes;o__Sebacinales;f__Serendipitaceae;g__Serendipita;s__Serendipita_herbamans	UCL8_007058
22_188	HQ154217	Trifolium_pratense	Germany	present_in	SH1723664.08FU	k__Fungi;p__Basidiomycota;c__Agaricomycetes;o__Sebacinales;f__Serendipitaceae;g__Serendipita;s__Serendipita_herbamans	UCL8_007058
22_195	HQ154245	Bistorta_officinalis	Germany	duplicate_of_HQ154217|Trifolium_pratense|Germany	SH1723664.08FU	k__Fungi;p__Basidiomycota;c__Agaricomycetes;o__Sebacinales;f__Serendipitaceae;g__Serendipita;s__Serendipita_herbamans	UCL8_007058
22_200	HQ154255	Trifolium_pratense	Germany	duplicate_of_HQ154217|Trifolium_pratense|Germany	SH1723664.08FU	k__Fungi;p__Basidiomycota;c__Agaricomycetes;o__Sebacinales;f__Serendipitaceae;g__Serendipita;s__Serendipita_herbamans	UCL8_007058
22_192	HQ154237	Potentilla_anserina	Germany	present_in	SH1723664.08FU	k__Fungi;p__Basidiomycota;c__Agaricomycetes;o__Sebacinales;f__Serendipitaceae;g__Serendipita;s__Serendipita_herbamans	UCL8_007058
22_190	HQ154235	Parnassia_palustris	Germany	present_in	SH1723664.08FU	k__Fungi;p__Basidiomycota;c__Agaricomycetes;o__Sebacinales;f__Serendipitaceae;g__Serendipita;s__Serendipita_herbamans	UCL8_007058
22_191	HQ154236	Carlina_acaulis	Germany	duplicate_of_HQ154235|Parnassia_palustris|Germany	SH1723664.08FU	k__Fungi;p__Basidiomycota;c__Agaricomycetes;o__Sebacinales;f__Serendipitaceae;g__Serendipita;s__Serendipita_herbamans	UCL8_007058
22_213	HQ154417	Poaceae	Germany	duplicate_of_HQ154235|Parnassia_palustris|Germany	SH1723664.08FU	k__Fungi;p__Basidiomycota;c__Agaricomycetes;o__Sebacinales;f__Serendipitaceae;g__Serendipita;s__Serendipita_herbamans	UCL8_007058
22_197	HQ154249	Bistorta_officinalis	Germany	present_in	SH1723664.08FU	k__Fungi;p__Basidiomycota;c__Agaricomycetes;o__Sebacinales;f__Serendipitaceae;g__Serendipita;s__Serendipita_herbamans	UCL8_007058
22_196	HQ154246	Bistorta_officinalis	Germany	present_in	SH1723664.08FU	k__Fungi;p__Basidiomycota;c__Agaricomycetes;o__Sebacinales;f__Serendipitaceae;g__Serendipita;s__Serendipita_herbamans	UCL8_007058
22_199	HQ154254	Trifolium_repens	Germany	present_in	SH1723664.08FU	k__Fungi;p__Basidiomycota;c__Agaricomycetes;o__Sebacinales;f__Serendipitaceae;g__Serendipita;s__Serendipita_herbamans	UCL8_007058
22_198	HQ154250	Bistorta_officinalis	Germany	present_in	SH1723664.08FU	k__Fungi;p__Basidiomycota;c__Agaricomycetes;o__Sebacinales;f__Serendipitaceae;g__Serendipita;s__Serendipita_herbamans	UCL8_007058
22_202	HQ154260	Trifolium_pratense	Germany	present_in	SH1723664.08FU	k__Fungi;p__Basidiomycota;c__Agaricomycetes;o__Sebacinales;f__Serendipitaceae;g__Serendipita;s__Serendipita_herbamans	UCL8_007058
22_206	HQ154335	Ranunculus_acris	Germany	present_in	SH1723664.08FU	k__Fungi;p__Basidiomycota;c__Agaricomycetes;o__Sebacinales;f__Serendipitaceae;g__Serendipita;s__Serendipita_herbamans	UCL8_007058
22_212	HQ154416	Poaceae	Germany	present_in	SH1723664.08FU	k__Fungi;p__Basidiomycota;c__Agaricomycetes;o__Sebacinales;f__Serendipitaceae;g__Serendipita;s__Serendipita_herbamans	UCL8_007058
22_300	MH231516	Neottia_ovata	Germany	present_in	SH2761650.08FU	k__Fungi;p__Basidiomycota;c__Agaricomycetes;o__Sebacinales;f__Serendipitaceae;g__Serendipita;s__Serendipita_herbamans	UCL8_007058
22_293	JF912455	Serapias_vomeracea	Italy	present_in	SH1723664.08FU	k__Fungi;p__Basidiomycota;c__Agaricomycetes;o__Sebacinales;f__Serendipitaceae;g__Serendipita;s__Serendipita_herbamans	UCL8_007058
22_133	GU189733	Medicago_lupulina_TUB_019241	Unspecified	present_in	SH1723664.08FU	k__Fungi;p__Basidiomycota;c__Agaricomycetes;o__Sebacinales;f__Serendipitaceae;g__Serendipita;s__Serendipita_herbamans	UCL8_007058
22_135	GU189695	Prunus_spinosa_TUB_019217	Unspecified	present_in	SH1723664.08FU	k__Fungi;p__Basidiomycota;c__Agaricomycetes;o__Sebacinales;f__Serendipitaceae;g__Serendipita;s__Serendipita_herbamans	UCL8_007058
22_134	GU189683	Veronica_persica_TUB_019250	Unspecified	present_in	SH1723664.08FU	k__Fungi;p__Basidiomycota;c__Agaricomycetes;o__Sebacinales;f__Serendipitaceae;g__Serendipita;s__Serendipita_herbamans	UCL8_007058
22_136	HQ180330	Plantago_lanceolata	Unspecified	present_in	SH1723664.08FU	k__Fungi;p__Basidiomycota;c__Agaricomycetes;o__Sebacinales;f__Serendipitaceae;g__Serendipita;s__Serendipita_herbamans	UCL8_007058
22_137	GU189721	Brachythecium_rutabulum_TUB_019204	Unspecified	present_in	SH1723664.08FU	k__Fungi;p__Basidiomycota;c__Agaricomycetes;o__Sebacinales;f__Serendipitaceae;g__Serendipita;s__Serendipita_herbamans	UCL8_007058
22_138	GU189724	Poa_annua_TUB_019226	Unspecified	present_in	SH1723664.08FU	k__Fungi;p__Basidiomycota;c__Agaricomycetes;o__Sebacinales;f__Serendipitaceae;g__Serendipita;s__Serendipita_herbamans	UCL8_007058
22_139	HQ180331	Plantago_lanceolata	Unspecified	present_in	SH1723664.08FU	k__Fungi;p__Basidiomycota;c__Agaricomycetes;o__Sebacinales;f__Serendipitaceae;g__Serendipita;s__Serendipita_herbamans	UCL8_007058
22_140	HQ180349	Medicago_lupulina	Unspecified	present_in	SH1723664.08FU	k__Fungi;p__Basidiomycota;c__Agaricomycetes;o__Sebacinales;f__Serendipitaceae;g__Serendipita;s__Serendipita_herbamans	UCL8_007058
22_142	GU189687	Pisum_sativum_TUB_019219	Unspecified	present_in	SH1723664.08FU	k__Fungi;p__Basidiomycota;c__Agaricomycetes;o__Sebacinales;f__Serendipitaceae;g__Serendipita;s__Serendipita_herbamans	UCL8_007058
22_157	EU910909	Medicago_lupulina	Unspecified	present_in	SH1723664.08FU	k__Fungi;p__Basidiomycota;c__Agaricomycetes;o__Sebacinales;f__Serendipitaceae;g__Serendipita;s__Serendipita_herbamans	UCL8_007058
22_230	HQ180291	Trifolium_pratense	Unspecified	duplicate_of_EU910909|Medicago_lupulina|Unspecified	SH1723664.08FU	k__Fungi;p__Basidiomycota;c__Agaricomycetes;o__Sebacinales;f__Serendipitaceae;g__Serendipita;s__Serendipita_herbamans	UCL8_007058
22_239	HQ180302	Ranunculus_bulbosus	Unspecified	duplicate_of_EU910909|Medicago_lupulina|Unspecified	SH1723664.08FU	k__Fungi;p__Basidiomycota;c__Agaricomycetes;o__Sebacinales;f__Serendipitaceae;g__Serendipita;s__Serendipita_herbamans	UCL8_007058
22_246	HQ180309	Ranunculus_bulbosus	Unspecified	duplicate_of_EU910909|Medicago_lupulina|Unspecified	SH1723664.08FU	k__Fungi;p__Basidiomycota;c__Agaricomycetes;o__Sebacinales;f__Serendipitaceae;g__Serendipita;s__Serendipita_herbamans	UCL8_007058
22_256	HQ180319	Ranunculus_bulbosus	Unspecified	duplicate_of_EU910909|Medicago_lupulina|Unspecified	SH1723664.08FU	k__Fungi;p__Basidiomycota;c__Agaricomycetes;o__Sebacinales;f__Serendipitaceae;g__Serendipita;s__Serendipita_herbamans	UCL8_007058
22_274	HQ180339	Plantago_media	Unspecified	duplicate_of_EU910909|Medicago_lupulina|Unspecified	SH1723664.08FU	k__Fungi;p__Basidiomycota;c__Agaricomycetes;o__Sebacinales;f__Serendipitaceae;g__Serendipita;s__Serendipita_herbamans	UCL8_007058
22_158	EU910913	Vicia_cracca	Unspecified	present_in	SH1723664.08FU	k__Fungi;p__Basidiomycota;c__Agaricomycetes;o__Sebacinales;f__Serendipitaceae;g__Serendipita;s__Serendipita_herbamans	UCL8_007058
22_159	EU910915	Vicia_cracca	Unspecified	present_in	SH1723664.08FU	k__Fungi;p__Basidiomycota;c__Agaricomycetes;o__Sebacinales;f__Serendipitaceae;g__Serendipita;s__Serendipita_herbamans	UCL8_007058
22_165	GU189682	Veronica_persica_TUB_019249	Unspecified	duplicate_of_EU910915|Vicia_cracca|Unspecified	SH1723664.08FU	k__Fungi;p__Basidiomycota;c__Agaricomycetes;o__Sebacinales;f__Serendipitaceae;g__Serendipita;s__Serendipita_herbamans	UCL8_007058
22_170	GU189697	Plantago_lanceolata_TUB_019220	Unspecified	duplicate_of_EU910915|Vicia_cracca|Unspecified	SH1723664.08FU	k__Fungi;p__Basidiomycota;c__Agaricomycetes;o__Sebacinales;f__Serendipitaceae;g__Serendipita;s__Serendipita_herbamans	UCL8_007058
22_185	GU189740	Cerastium_cf_holosteoides_TUB_019259	Unspecified	duplicate_of_EU910915|Vicia_cracca|Unspecified	SH1723664.08FU	k__Fungi;p__Basidiomycota;c__Agaricomycetes;o__Sebacinales;f__Serendipitaceae;g__Serendipita;s__Serendipita_herbamans	UCL8_007058
22_216	HQ180271	Plantago_lanceolata	Unspecified	duplicate_of_EU910915|Vicia_cracca|Unspecified	SH1723664.08FU	k__Fungi;p__Basidiomycota;c__Agaricomycetes;o__Sebacinales;f__Serendipitaceae;g__Serendipita;s__Serendipita_herbamans	UCL8_007058
22_218	HQ180273	Plantago_lanceolata	Unspecified	duplicate_of_EU910915|Vicia_cracca|Unspecified	SH1723664.08FU	k__Fungi;p__Basidiomycota;c__Agaricomycetes;o__Sebacinales;f__Serendipitaceae;g__Serendipita;s__Serendipita_herbamans	UCL8_007058
22_219	HQ180274	Trifolium_pratense	Unspecified	duplicate_of_EU910915|Vicia_cracca|Unspecified	SH1723664.08FU	k__Fungi;p__Basidiomycota;c__Agaricomycetes;o__Sebacinales;f__Serendipitaceae;g__Serendipita;s__Serendipita_herbamans	UCL8_007058
22_232	HQ180293	Trifolium_pratense	Unspecified	duplicate_of_EU910915|Vicia_cracca|Unspecified	SH1723664.08FU	k__Fungi;p__Basidiomycota;c__Agaricomycetes;o__Sebacinales;f__Serendipitaceae;g__Serendipita;s__Serendipita_herbamans	UCL8_007058
22_233	HQ180294	Trifolium_pratense	Unspecified	duplicate_of_EU910915|Vicia_cracca|Unspecified	SH1723664.08FU	k__Fungi;p__Basidiomycota;c__Agaricomycetes;o__Sebacinales;f__Serendipitaceae;g__Serendipita;s__Serendipita_herbamans	UCL8_007058
22_252	HQ180315	Ranunculus_bulbosus	Unspecified	duplicate_of_EU910915|Vicia_cracca|Unspecified	SH1723664.08FU	k__Fungi;p__Basidiomycota;c__Agaricomycetes;o__Sebacinales;f__Serendipitaceae;g__Serendipita;s__Serendipita_herbamans	UCL8_007058
22_254	HQ180317	Ranunculus_bulbosus	Unspecified	duplicate_of_EU910915|Vicia_cracca|Unspecified	SH1723664.08FU	k__Fungi;p__Basidiomycota;c__Agaricomycetes;o__Sebacinales;f__Serendipitaceae;g__Serendipita;s__Serendipita_herbamans	UCL8_007058
22_257	HQ180320	Lathyrus_pratensis	Unspecified	duplicate_of_EU910915|Vicia_cracca|Unspecified	SH1723664.08FU	k__Fungi;p__Basidiomycota;c__Agaricomycetes;o__Sebacinales;f__Serendipitaceae;g__Serendipita;s__Serendipita_herbamans	UCL8_007058
22_264	HQ180327	Onobrychis_viciifolia	Unspecified	duplicate_of_EU910915|Vicia_cracca|Unspecified	SH1723664.08FU	k__Fungi;p__Basidiomycota;c__Agaricomycetes;o__Sebacinales;f__Serendipitaceae;g__Serendipita;s__Serendipita_herbamans	UCL8_007058
22_266	HQ180329	Plantago_lanceolata	Unspecified	duplicate_of_EU910915|Vicia_cracca|Unspecified	SH1723664.08FU	k__Fungi;p__Basidiomycota;c__Agaricomycetes;o__Sebacinales;f__Serendipitaceae;g__Serendipita;s__Serendipita_herbamans	UCL8_007058
22_284	HQ180350	Medicago_lupulina	Unspecified	duplicate_of_EU910915|Vicia_cracca|Unspecified	SH1723664.08FU	k__Fungi;p__Basidiomycota;c__Agaricomycetes;o__Sebacinales;f__Serendipitaceae;g__Serendipita;s__Serendipita_herbamans	UCL8_007058
22_162	EU910938	Ranunculus_acris	Unspecified	present_in	SH1723664.08FU	k__Fungi;p__Basidiomycota;c__Agaricomycetes;o__Sebacinales;f__Serendipitaceae;g__Serendipita;s__Serendipita_herbamans	UCL8_007058
22_166	GU189688	x_Triticosecale_TUB_019213	Unspecified	present_in	SH1723664.08FU	k__Fungi;p__Basidiomycota;c__Agaricomycetes;o__Sebacinales;f__Serendipitaceae;g__Serendipita;s__Serendipita_herbamans	UCL8_007058
22_167	GU189690	Lolium_perenne_TUB_019262	Unspecified	duplicate_of_GU189688|x_Triticosecale_TUB_019213|Unspecified	SH1723664.08FU	k__Fungi;p__Basidiomycota;c__Agaricomycetes;o__Sebacinales;f__Serendipitaceae;g__Serendipita;s__Serendipita_herbamans	UCL8_007058
22_168	GU189691	Plantago_lanceolata_TUB_019220	Unspecified	duplicate_of_GU189688|x_Triticosecale_TUB_019213|Unspecified	SH1723664.08FU	k__Fungi;p__Basidiomycota;c__Agaricomycetes;o__Sebacinales;f__Serendipitaceae;g__Serendipita;s__Serendipita_herbamans	UCL8_007058
22_171	GU189701	Pisum_sativum_TUB_019189	Unspecified	duplicate_of_GU189688|x_Triticosecale_TUB_019213|Unspecified	SH1723664.08FU	k__Fungi;p__Basidiomycota;c__Agaricomycetes;o__Sebacinales;f__Serendipitaceae;g__Serendipita;s__Serendipita_herbamans	UCL8_007058
22_169	GU189694	Alopecurus_myosuroides_TUB_019216	Unspecified	present_in	SH1723664.08FU	k__Fungi;p__Basidiomycota;c__Agaricomycetes;o__Sebacinales;f__Serendipitaceae;g__Serendipita;s__Serendipita_herbamans	UCL8_007058
22_173	GU189715	Triticum_aestivum_TUB_019245	Unspecified	present_in	SH1723664.08FU	k__Fungi;p__Basidiomycota;c__Agaricomycetes;o__Sebacinales;f__Serendipitaceae;g__Serendipita;s__Serendipita_herbamans	UCL8_007058
22_220	HQ180278	Glechoma_hederacea	Unspecified	duplicate_of_GU189715|Triticum_aestivum_TUB_019245|Unspecified	SH1723664.08FU	k__Fungi;p__Basidiomycota;c__Agaricomycetes;o__Sebacinales;f__Serendipitaceae;g__Serendipita;s__Serendipita_herbamans	UCL8_007058
22_229	HQ180289	Trifolium_repens	Unspecified	duplicate_of_GU189715|Triticum_aestivum_TUB_019245|Unspecified	SH1723664.08FU	k__Fungi;p__Basidiomycota;c__Agaricomycetes;o__Sebacinales;f__Serendipitaceae;g__Serendipita;s__Serendipita_herbamans	UCL8_007058
22_242	HQ180305	Ranunculus_bulbosus	Unspecified	duplicate_of_GU189715|Triticum_aestivum_TUB_019245|Unspecified	SH1723664.08FU	k__Fungi;p__Basidiomycota;c__Agaricomycetes;o__Sebacinales;f__Serendipitaceae;g__Serendipita;s__Serendipita_herbamans	UCL8_007058
22_174	GU189716	Veronica_persica_TUB_019206	Unspecified	present_in	SH1723664.08FU	k__Fungi;p__Basidiomycota;c__Agaricomycetes;o__Sebacinales;f__Serendipitaceae;g__Serendipita;s__Serendipita_herbamans	UCL8_007058
22_177	GU189726	Cirsium_arvense_TUB_019242	Unspecified	duplicate_of_GU189716|Veronica_persica_TUB_019206|Unspecified	SH1723664.08FU	k__Fungi;p__Basidiomycota;c__Agaricomycetes;o__Sebacinales;f__Serendipitaceae;g__Serendipita;s__Serendipita_herbamans	UCL8_007058
22_178	GU189727	Poa_annua_TUB_019224	Unspecified	duplicate_of_GU189716|Veronica_persica_TUB_019206|Unspecified	SH1723664.08FU	k__Fungi;p__Basidiomycota;c__Agaricomycetes;o__Sebacinales;f__Serendipitaceae;g__Serendipita;s__Serendipita_herbamans	UCL8_007058
22_175	GU189717	Poa_annua_TUB_019205	Unspecified	present_in	SH1723664.08FU	k__Fungi;p__Basidiomycota;c__Agaricomycetes;o__Sebacinales;f__Serendipitaceae;g__Serendipita;s__Serendipita_herbamans	UCL8_007058
22_176	GU189720	Trifolium_repens_TUB_019248	Unspecified	present_in	SH1723664.08FU	k__Fungi;p__Basidiomycota;c__Agaricomycetes;o__Sebacinales;f__Serendipitaceae;g__Serendipita;s__Serendipita_herbamans	UCL8_007058
22_179	GU189728	Plantago_major_TUB_019225	Unspecified	present_in	SH1723664.08FU	k__Fungi;p__Basidiomycota;c__Agaricomycetes;o__Sebacinales;f__Serendipitaceae;g__Serendipita;s__Serendipita_herbamans	UCL8_007058
22_234	HQ180296	Trifolium_pratense	Unspecified	duplicate_of_GU189728|Plantago_major_TUB_019225|Unspecified	SH1723664.08FU	k__Fungi;p__Basidiomycota;c__Agaricomycetes;o__Sebacinales;f__Serendipitaceae;g__Serendipita;s__Serendipita_herbamans	UCL8_007058
22_180	GU189732	Galium_mollugo_TUB_019240	Unspecified	present_in	SH1723664.08FU	k__Fungi;p__Basidiomycota;c__Agaricomycetes;o__Sebacinales;f__Serendipitaceae;g__Serendipita;s__Serendipita_herbamans	UCL8_007058
22_181	GU189734	Ranunculus_bulbosus_TUB_019208	Unspecified	duplicate_of_GU189732|Galium_mollugo_TUB_019240|Unspecified	SH1723664.08FU	k__Fungi;p__Basidiomycota;c__Agaricomycetes;o__Sebacinales;f__Serendipitaceae;g__Serendipita;s__Serendipita_herbamans	UCL8_007058
22_182	GU189735	Brachythecium_rutabulum_TUB_019244	Unspecified	duplicate_of_GU189732|Galium_mollugo_TUB_019240|Unspecified	SH1723664.08FU	k__Fungi;p__Basidiomycota;c__Agaricomycetes;o__Sebacinales;f__Serendipitaceae;g__Serendipita;s__Serendipita_herbamans	UCL8_007058
22_186	GU189741	Veronica_persica_TUB_019251	Unspecified	duplicate_of_GU189732|Galium_mollugo_TUB_019240|Unspecified	SH1723664.08FU	k__Fungi;p__Basidiomycota;c__Agaricomycetes;o__Sebacinales;f__Serendipitaceae;g__Serendipita;s__Serendipita_herbamans	UCL8_007058
22_184	GU189737	Cerastium_cf_holosteoides_TUB_019253	Unspecified	present_in	SH1723664.08FU	k__Fungi;p__Basidiomycota;c__Agaricomycetes;o__Sebacinales;f__Serendipitaceae;g__Serendipita;s__Serendipita_herbamans	UCL8_007058
22_183	GU189736	Cerastium_cf_holosteoides_TUB_019252	Unspecified	present_in	SH1723664.08FU	k__Fungi;p__Basidiomycota;c__Agaricomycetes;o__Sebacinales;f__Serendipitaceae;g__Serendipita;s__Serendipita_herbamans	UCL8_007058
22_187	GU189746	Elymus_repens_TUB_019269	Unspecified	present_in	SH1723664.08FU	k__Fungi;p__Basidiomycota;c__Agaricomycetes;o__Sebacinales;f__Serendipitaceae;g__Serendipita;s__Serendipita_herbamans	UCL8_007058
22_236	HQ180299	Ranunculus_bulbosus	Unspecified	duplicate_of_HQ154246|Bistorta_officinalis|Germany	SH1723664.08FU	k__Fungi;p__Basidiomycota;c__Agaricomycetes;o__Sebacinales;f__Serendipitaceae;g__Serendipita;s__Serendipita_herbamans	UCL8_007058
22_259	HQ180322	Lotus_corniculatus	Unspecified	duplicate_of_HQ154246|Bistorta_officinalis|Germany	SH1723664.08FU	k__Fungi;p__Basidiomycota;c__Agaricomycetes;o__Sebacinales;f__Serendipitaceae;g__Serendipita;s__Serendipita_herbamans	UCL8_007058
22_247	HQ180310	Ranunculus_bulbosus	Unspecified	duplicate_of_HQ154254|Trifolium_repens|Germany	SH1723664.08FU	k__Fungi;p__Basidiomycota;c__Agaricomycetes;o__Sebacinales;f__Serendipitaceae;g__Serendipita;s__Serendipita_herbamans	UCL8_007058
22_273	HQ180338	Plantago_media	Unspecified	duplicate_of_HQ154254|Trifolium_repens|Germany	SH1723664.08FU	k__Fungi;p__Basidiomycota;c__Agaricomycetes;o__Sebacinales;f__Serendipitaceae;g__Serendipita;s__Serendipita_herbamans	UCL8_007058
22_278	HQ180343	Trifolium_pratense	Unspecified	duplicate_of_HQ154254|Trifolium_repens|Germany	SH1723664.08FU	k__Fungi;p__Basidiomycota;c__Agaricomycetes;o__Sebacinales;f__Serendipitaceae;g__Serendipita;s__Serendipita_herbamans	UCL8_007058
22_214	HQ180269	Trifolium_repens	Unspecified	present_in	SH1723664.08FU	k__Fungi;p__Basidiomycota;c__Agaricomycetes;o__Sebacinales;f__Serendipitaceae;g__Serendipita;s__Serendipita_herbamans	UCL8_007058
22_217	HQ180272	Plantago_lanceolata	Unspecified	present_in	SH1723664.08FU	k__Fungi;p__Basidiomycota;c__Agaricomycetes;o__Sebacinales;f__Serendipitaceae;g__Serendipita;s__Serendipita_herbamans	UCL8_007058
22_262	HQ180325	Trifolium_pratense	Unspecified	duplicate_of_HQ180272|Plantago_lanceolata|Unspecified	SH1723664.08FU	k__Fungi;p__Basidiomycota;c__Agaricomycetes;o__Sebacinales;f__Serendipitaceae;g__Serendipita;s__Serendipita_herbamans	UCL8_007058
22_221	HQ180279	Glechoma_hederacea	Unspecified	present_in	SH1723664.08FU	k__Fungi;p__Basidiomycota;c__Agaricomycetes;o__Sebacinales;f__Serendipitaceae;g__Serendipita;s__Serendipita_herbamans	UCL8_007058
22_222	HQ180282	Plantago_lanceolata	Unspecified	present_in	SH1723664.08FU	k__Fungi;p__Basidiomycota;c__Agaricomycetes;o__Sebacinales;f__Serendipitaceae;g__Serendipita;s__Serendipita_herbamans	UCL8_007058
22_223	HQ180283	Plantago_lanceolata	Unspecified	present_in	SH1723664.08FU	k__Fungi;p__Basidiomycota;c__Agaricomycetes;o__Sebacinales;f__Serendipitaceae;g__Serendipita;s__Serendipita_herbamans	UCL8_007058
22_241	HQ180304	Ranunculus_bulbosus	Unspecified	duplicate_of_HQ180283|Plantago_lanceolata|Unspecified	SH1723664.08FU	k__Fungi;p__Basidiomycota;c__Agaricomycetes;o__Sebacinales;f__Serendipitaceae;g__Serendipita;s__Serendipita_herbamans	UCL8_007058
22_275	HQ180340	Plantago_media	Unspecified	duplicate_of_HQ180283|Plantago_lanceolata|Unspecified	SH1723664.08FU	k__Fungi;p__Basidiomycota;c__Agaricomycetes;o__Sebacinales;f__Serendipitaceae;g__Serendipita;s__Serendipita_herbamans	UCL8_007058
22_277	HQ180342	Trifolium_pratense	Unspecified	duplicate_of_HQ180283|Plantago_lanceolata|Unspecified	SH1723664.08FU	k__Fungi;p__Basidiomycota;c__Agaricomycetes;o__Sebacinales;f__Serendipitaceae;g__Serendipita;s__Serendipita_herbamans	UCL8_007058
22_281	HQ180346	Ranunculus_bulbosus	Unspecified	duplicate_of_HQ180283|Plantago_lanceolata|Unspecified	SH1723664.08FU	k__Fungi;p__Basidiomycota;c__Agaricomycetes;o__Sebacinales;f__Serendipitaceae;g__Serendipita;s__Serendipita_herbamans	UCL8_007058
22_224	HQ180284	Plantago_lanceolata	Unspecified	present_in	SH1723664.08FU	k__Fungi;p__Basidiomycota;c__Agaricomycetes;o__Sebacinales;f__Serendipitaceae;g__Serendipita;s__Serendipita_herbamans	UCL8_007058
22_226	HQ180286	Plantago_lanceolata	Unspecified	present_in	SH1723664.08FU	k__Fungi;p__Basidiomycota;c__Agaricomycetes;o__Sebacinales;f__Serendipitaceae;g__Serendipita;s__Serendipita_herbamans	UCL8_007058
22_227	HQ180287	Plantago_lanceolata	Unspecified	duplicate_of_HQ180286|Plantago_lanceolata|Unspecified	SH1723664.08FU	k__Fungi;p__Basidiomycota;c__Agaricomycetes;o__Sebacinales;f__Serendipitaceae;g__Serendipita;s__Serendipita_herbamans	UCL8_007058
22_276	HQ180341	Plantago_media	Unspecified	duplicate_of_HQ180286|Plantago_lanceolata|Unspecified	SH1723664.08FU	k__Fungi;p__Basidiomycota;c__Agaricomycetes;o__Sebacinales;f__Serendipitaceae;g__Serendipita;s__Serendipita_herbamans	UCL8_007058
22_225	HQ180285	Plantago_lanceolata	Unspecified	present_in	SH1723664.08FU	k__Fungi;p__Basidiomycota;c__Agaricomycetes;o__Sebacinales;f__Serendipitaceae;g__Serendipita;s__Serendipita_herbamans	UCL8_007058
22_235	HQ180297	Ranunculus_bulbosus	Unspecified	duplicate_of_HQ180285|Plantago_lanceolata|Unspecified	SH1723664.08FU	k__Fungi;p__Basidiomycota;c__Agaricomycetes;o__Sebacinales;f__Serendipitaceae;g__Serendipita;s__Serendipita_herbamans	UCL8_007058
22_238	HQ180301	Ranunculus_bulbosus	Unspecified	duplicate_of_HQ180285|Plantago_lanceolata|Unspecified	SH1723664.08FU	k__Fungi;p__Basidiomycota;c__Agaricomycetes;o__Sebacinales;f__Serendipitaceae;g__Serendipita;s__Serendipita_herbamans	UCL8_007058
22_245	HQ180308	Medicago_lupulina	Unspecified	duplicate_of_HQ180285|Plantago_lanceolata|Unspecified	SH1723664.08FU	k__Fungi;p__Basidiomycota;c__Agaricomycetes;o__Sebacinales;f__Serendipitaceae;g__Serendipita;s__Serendipita_herbamans	UCL8_007058
22_248	HQ180311	Ranunculus_bulbosus	Unspecified	duplicate_of_HQ180285|Plantago_lanceolata|Unspecified	SH1723664.08FU	k__Fungi;p__Basidiomycota;c__Agaricomycetes;o__Sebacinales;f__Serendipitaceae;g__Serendipita;s__Serendipita_herbamans	UCL8_007058
22_250	HQ180313	Ranunculus_bulbosus	Unspecified	duplicate_of_HQ180285|Plantago_lanceolata|Unspecified	SH1723664.08FU	k__Fungi;p__Basidiomycota;c__Agaricomycetes;o__Sebacinales;f__Serendipitaceae;g__Serendipita;s__Serendipita_herbamans	UCL8_007058
22_253	HQ180316	Ranunculus_bulbosus	Unspecified	duplicate_of_HQ180285|Plantago_lanceolata|Unspecified	SH1723664.08FU	k__Fungi;p__Basidiomycota;c__Agaricomycetes;o__Sebacinales;f__Serendipitaceae;g__Serendipita;s__Serendipita_herbamans	UCL8_007058
22_255	HQ180318	Ranunculus_bulbosus	Unspecified	duplicate_of_HQ180285|Plantago_lanceolata|Unspecified	SH1723664.08FU	k__Fungi;p__Basidiomycota;c__Agaricomycetes;o__Sebacinales;f__Serendipitaceae;g__Serendipita;s__Serendipita_herbamans	UCL8_007058
22_280	HQ180345	Trifolium_pratense	Unspecified	duplicate_of_HQ180285|Plantago_lanceolata|Unspecified	SH1723664.08FU	k__Fungi;p__Basidiomycota;c__Agaricomycetes;o__Sebacinales;f__Serendipitaceae;g__Serendipita;s__Serendipita_herbamans	UCL8_007058
22_283	HQ180348	Medicago_lupulina	Unspecified	duplicate_of_HQ180285|Plantago_lanceolata|Unspecified	SH1723664.08FU	k__Fungi;p__Basidiomycota;c__Agaricomycetes;o__Sebacinales;f__Serendipitaceae;g__Serendipita;s__Serendipita_herbamans	UCL8_007058
22_228	HQ180288	Plantago_lanceolata	Unspecified	present_in	SH1723664.08FU	k__Fungi;p__Basidiomycota;c__Agaricomycetes;o__Sebacinales;f__Serendipitaceae;g__Serendipita;s__Serendipita_herbamans	UCL8_007058
22_231	HQ180292	Trifolium_pratense	Unspecified	present_in	SH1723664.08FU	k__Fungi;p__Basidiomycota;c__Agaricomycetes;o__Sebacinales;f__Serendipitaceae;g__Serendipita;s__Serendipita_herbamans	UCL8_007058
22_243	HQ180306	Ranunculus_bulbosus	Unspecified	duplicate_of_HQ180292|Trifolium_pratense|Unspecified	SH1723664.08FU	k__Fungi;p__Basidiomycota;c__Agaricomycetes;o__Sebacinales;f__Serendipitaceae;g__Serendipita;s__Serendipita_herbamans	UCL8_007058
22_237	HQ180300	Ranunculus_bulbosus	Unspecified	present_in	SH1723664.08FU	k__Fungi;p__Basidiomycota;c__Agaricomycetes;o__Sebacinales;f__Serendipitaceae;g__Serendipita;s__Serendipita_herbamans	UCL8_007058
22_244	HQ180307	Medicago_lupulina	Unspecified	duplicate_of_HQ180300|Ranunculus_bulbosus|Unspecified	SH1723664.08FU	k__Fungi;p__Basidiomycota;c__Agaricomycetes;o__Sebacinales;f__Serendipitaceae;g__Serendipita;s__Serendipita_herbamans	UCL8_007058
22_251	HQ180314	Ranunculus_bulbosus	Unspecified	duplicate_of_HQ180300|Ranunculus_bulbosus|Unspecified	SH1723664.08FU	k__Fungi;p__Basidiomycota;c__Agaricomycetes;o__Sebacinales;f__Serendipitaceae;g__Serendipita;s__Serendipita_herbamans	UCL8_007058
22_285	HQ180351	Medicago_lupulina	Unspecified	duplicate_of_HQ180300|Ranunculus_bulbosus|Unspecified	SH1723664.08FU	k__Fungi;p__Basidiomycota;c__Agaricomycetes;o__Sebacinales;f__Serendipitaceae;g__Serendipita;s__Serendipita_herbamans	UCL8_007058
22_240	HQ180303	Ranunculus_bulbosus	Unspecified	present_in	SH1723664.08FU	k__Fungi;p__Basidiomycota;c__Agaricomycetes;o__Sebacinales;f__Serendipitaceae;g__Serendipita;s__Serendipita_herbamans	UCL8_007058
22_249	HQ180312	Ranunculus_bulbosus	Unspecified	present_in	SH1723664.08FU	k__Fungi;p__Basidiomycota;c__Agaricomycetes;o__Sebacinales;f__Serendipitaceae;g__Serendipita;s__Serendipita_herbamans	UCL8_007058
22_258	HQ180321	Lotus_corniculatus	Unspecified	present_in	SH1723664.08FU	k__Fungi;p__Basidiomycota;c__Agaricomycetes;o__Sebacinales;f__Serendipitaceae;g__Serendipita;s__Serendipita_herbamans	UCL8_007058
22_263	HQ180326	Thymus_pulegioides	Unspecified	present_in	SH1723664.08FU	k__Fungi;p__Basidiomycota;c__Agaricomycetes;o__Sebacinales;f__Serendipitaceae;g__Serendipita;s__Serendipita_herbamans	UCL8_007058
22_268	HQ180333	Plantago_lanceolata	Unspecified	duplicate_of_HQ180326|Thymus_pulegioides|Unspecified	SH1723664.08FU	k__Fungi;p__Basidiomycota;c__Agaricomycetes;o__Sebacinales;f__Serendipitaceae;g__Serendipita;s__Serendipita_herbamans	UCL8_007058
22_269	HQ180334	Plantago_lanceolata	Unspecified	duplicate_of_HQ180326|Thymus_pulegioides|Unspecified	SH1723664.08FU	k__Fungi;p__Basidiomycota;c__Agaricomycetes;o__Sebacinales;f__Serendipitaceae;g__Serendipita;s__Serendipita_herbamans	UCL8_007058
22_270	HQ180335	Ranunculus_bulbosus	Unspecified	duplicate_of_HQ180326|Thymus_pulegioides|Unspecified	SH1723664.08FU	k__Fungi;p__Basidiomycota;c__Agaricomycetes;o__Sebacinales;f__Serendipitaceae;g__Serendipita;s__Serendipita_herbamans	UCL8_007058
22_271	HQ180336	Ranunculus_bulbosus	Unspecified	duplicate_of_HQ180326|Thymus_pulegioides|Unspecified	SH1723664.08FU	k__Fungi;p__Basidiomycota;c__Agaricomycetes;o__Sebacinales;f__Serendipitaceae;g__Serendipita;s__Serendipita_herbamans	UCL8_007058
22_260	HQ180323	Glechoma_hederacea	Unspecified	present_in	SH1723664.08FU	k__Fungi;p__Basidiomycota;c__Agaricomycetes;o__Sebacinales;f__Serendipitaceae;g__Serendipita;s__Serendipita_herbamans	UCL8_007058
22_265	HQ180328	Vicia_sepium	Unspecified	present_in	SH1723664.08FU	k__Fungi;p__Basidiomycota;c__Agaricomycetes;o__Sebacinales;f__Serendipitaceae;g__Serendipita;s__Serendipita_herbamans	UCL8_007058
22_272	HQ180337	Plantago_media	Unspecified	present_in	SH1723664.08FU	k__Fungi;p__Basidiomycota;c__Agaricomycetes;o__Sebacinales;f__Serendipitaceae;g__Serendipita;s__Serendipita_herbamans	UCL8_007058
22_279	HQ180344	Trifolium_pratense	Unspecified	present_in	SH1723664.08FU	k__Fungi;p__Basidiomycota;c__Agaricomycetes;o__Sebacinales;f__Serendipitaceae;g__Serendipita;s__Serendipita_herbamans	UCL8_007058
22_282	HQ180347	Ranunculus_bulbosus	Unspecified	duplicate_of_HQ180344|Trifolium_pratense|Unspecified	SH1723664.08FU	k__Fungi;p__Basidiomycota;c__Agaricomycetes;o__Sebacinales;f__Serendipitaceae;g__Serendipita;s__Serendipita_herbamans	UCL8_007058
22_286	KF061285	Bistorta_vivipara	Unspecified	present_in	SH1723664.08FU	k__Fungi;p__Basidiomycota;c__Agaricomycetes;o__Sebacinales;f__Serendipitaceae;g__Serendipita;s__Serendipita_herbamans	UCL8_007058
22_294	GU189713	Lamium_purpureum_TUB_019222	Unspecified	present_in	SH1723664.08FU	k__Fungi;p__Basidiomycota;c__Agaricomycetes;o__Sebacinales;f__Serendipitaceae;g__Serendipita;s__Serendipita_herbamans	UCL8_007058
22_291	NR_144842	Bistorta_vivipara		duplicate_of_KF061285|Bistorta_vivipara|Unspecified	SH1723664.08FU	k__Fungi;p__Basidiomycota;c__Agaricomycetes;o__Sebacinales;f__Serendipitaceae;g__Serendipita;s__Serendipita_herbamans	UCL8_007058
22_306	JX630554	Dryas_integrifolia	Canada	present_in	SH1750232.08FU	k__Fungi;p__Basidiomycota;c__Agaricomycetes;o__Sebacinales;f__Serendipitaceae;g__Serendipita;s__Serendipita_sp	UCL8_009172
22_307	Serendipita__KF296729		Canada	present_in	SH1750232.08FU	k__Fungi;p__Basidiomycota;c__Agaricomycetes;o__Sebacinales;f__Serendipitaceae;g__Serendipita;s__Serendipita_sp	UCL8_009172
22_843	Serendipita__EU554746		Canada	present_in	SH1723697.08FU	k__Fungi;p__Basidiomycota;c__Agaricomycetes;o__Sebacinales;f__Serendipitaceae;g__Serendipita;s__Serendipita_sp	UCL8_007058
22_65	FN663728	Psammisia_guianensis	Ecuador	present_in	SH1750150.08FU	k__Fungi;p__Basidiomycota;c__Agaricomycetes;o__Sebacinales;f__Serendipitaceae;g__Serendipita;s__Serendipita_sp	UCL8_009172
22_76	Serendipita__UDB002608__sample	Betula_pendula	Estonia	present_in	SH1750157.08FU	k__Fungi;p__Basidiomycota;c__Agaricomycetes;o__Sebacinales;f__Serendipitaceae;g__Serendipita;s__Serendipita_sp	UCL8_009172
22_507	HM136664	Festuca_paniculata	France	present_in	SH1750387.08FU	k__Fungi;p__Basidiomycota;c__Agaricomycetes;o__Sebacinales;f__Serendipitaceae;g__Serendipita;s__Serendipita_sp	UCL8_009172
22_128	HQ154277	Impatiens_noli-tangere	Germany	present_in	SH1750369.08FU	k__Fungi;p__Basidiomycota;c__Agaricomycetes;o__Sebacinales;f__Serendipitaceae;g__Serendipita;s__Serendipita_sp	UCL8_009172
22_308	KC986274	Bistorta_vivipara	Germany	present_in	SH1750383.08FU	k__Fungi;p__Basidiomycota;c__Agaricomycetes;o__Sebacinales;f__Serendipitaceae;g__Serendipita;s__Serendipita_sp	UCL8_009172
22_658	HQ154328	Oxalis_acetosella	Germany	present_in	SH1750392.08FU	k__Fungi;p__Basidiomycota;c__Agaricomycetes;o__Sebacinales;f__Serendipitaceae;g__Serendipita;s__Serendipita_sp	UCL8_009172
22_150	FJ556812	Serapias_vomeracea_specimen_voucher_MW662	Italy	present_in	SH1723680.08FU	k__Fungi;p__Basidiomycota;c__Agaricomycetes;o__Sebacinales;f__Serendipitaceae;g__Serendipita;s__Serendipita_sp	UCL8_007058
22_163	FJ556807	Medicago_lupulina	Italy	present_in	SH1723680.08FU	k__Fungi;p__Basidiomycota;c__Agaricomycetes;o__Sebacinales;f__Serendipitaceae;g__Serendipita;s__Serendipita_sp	UCL8_007058
22_379	MH794948	Quercus_pubescens	Italy	present_in	SH1750201.08FU	k__Fungi;p__Basidiomycota;c__Agaricomycetes;o__Sebacinales;f__Serendipitaceae;g__Serendipita;s__Serendipita_sp	UCL8_009172
22_398	Serendipita__AB669675__sample	Pyrola_asarifolia	Japan	present_in	SH1750149.08FU	k__Fungi;p__Basidiomycota;c__Agaricomycetes;o__Sebacinales;f__Serendipitaceae;g__Serendipita;s__Serendipita_sp	UCL8_009172
22_108	GQ907135	Diplophyllum_sp.	Malaysia	present_in	SH1750248.08FU	k__Fungi;p__Basidiomycota;c__Agaricomycetes;o__Sebacinales;f__Serendipitaceae;g__Serendipita;s__Serendipita_sp	UCL8_009172
22_72	Serendipita__UDB026861__Bistorta_vivipara_sample	Bistorta_vivipara	Norway	present_in	SH1750149.08FU	k__Fungi;p__Basidiomycota;c__Agaricomycetes;o__Sebacinales;f__Serendipitaceae;g__Serendipita;s__Serendipita_sp	UCL8_009172
22_376	Serendipita__GU817148__sample	Bistorta_vivipara	Norway	present_in	SH1750377.08FU	k__Fungi;p__Basidiomycota;c__Agaricomycetes;o__Sebacinales;f__Serendipitaceae;g__Serendipita;s__Serendipita_sp	UCL8_009172
22_73	Serendipita__UDB027257__Bistorta_vivipara_sample	Bistorta_vivipara	Svalbard_and_Jan_Mayen	present_in	SH1750149.08FU	k__Fungi;p__Basidiomycota;c__Agaricomycetes;o__Sebacinales;f__Serendipitaceae;g__Serendipita;s__Serendipita_sp	UCL8_009172
22_506	Serendipita__KF618028		United_States	present_in	SH1750386.08FU	k__Fungi;p__Basidiomycota;c__Agaricomycetes;o__Sebacinales;f__Serendipitaceae;g__Serendipita;s__Serendipita_sp	UCL8_009172
22_66	KM522828		Unspecified	present_in	SH1750264.08FU	k__Fungi;p__Basidiomycota;c__Agaricomycetes;o__Sebacinales;f__Serendipitaceae;g__Serendipita;s__Serendipita_sp	UCL8_009172
22_105	GQ240918	Pinus_massoniana	China	present_in	SH1750162.08FU	k__Fungi;p__Basidiomycota;c__Agaricomycetes;o__Sebacinales;f__Serendipitaceae;g__unidentified;s__Serendipitaceae_sp	UCL8_009172
22_85	Serendipita__EU554682__sample	Populus	Canada	present_in	SH1750151.08FU	k__Fungi;p__Basidiomycota;c__Agaricomycetes;o__Sebacinales;f__unidentified;g__unidentified;s__Sebacinales_sp	UCL8_009172
22_87	Serendipita__EU554869__sample	Populus	Canada	duplicate_of_Serendipita__EU554682__sample|Populus|Canada	SH1750151.08FU	k__Fungi;p__Basidiomycota;c__Agaricomycetes;o__Sebacinales;f__unidentified;g__unidentified;s__Sebacinales_sp	UCL8_009172
22_88	Serendipita__EU554893__sample	Populus	Canada	present_in	SH1750151.08FU	k__Fungi;p__Basidiomycota;c__Agaricomycetes;o__Sebacinales;f__unidentified;g__unidentified;s__Sebacinales_sp	UCL8_009172
22_86	Serendipita__EU554697__sample	Populus	Canada	present_in	SH1750151.08FU	k__Fungi;p__Basidiomycota;c__Agaricomycetes;o__Sebacinales;f__unidentified;g__unidentified;s__Sebacinales_sp	UCL8_009172
22_90	Serendipita__EU554901__sample	Populus	Canada	present_in	SH1750151.08FU	k__Fungi;p__Basidiomycota;c__Agaricomycetes;o__Sebacinales;f__unidentified;g__unidentified;s__Sebacinales_sp	UCL8_009172
22_92	Serendipita__FJ626934__sample	Populus	Canada	duplicate_of_Serendipita__EU554901__sample|Populus|Canada	SH1750151.08FU	k__Fungi;p__Basidiomycota;c__Agaricomycetes;o__Sebacinales;f__unidentified;g__unidentified;s__Sebacinales_sp	UCL8_009172
22_91	Serendipita__EU554927__sample	Populus	Canada	present_in	SH1750151.08FU	k__Fungi;p__Basidiomycota;c__Agaricomycetes;o__Sebacinales;f__unidentified;g__unidentified;s__Sebacinales_sp	UCL8_009172
22_93	Serendipita__EU554923__sample	Populus	Canada	present_in	SH1750151.08FU	k__Fungi;p__Basidiomycota;c__Agaricomycetes;o__Sebacinales;f__unidentified;g__unidentified;s__Sebacinales_sp	UCL8_009172
22_94	Serendipita__EU554931__sample	Populus	Canada	present_in	SH1750151.08FU	k__Fungi;p__Basidiomycota;c__Agaricomycetes;o__Sebacinales;f__unidentified;g__unidentified;s__Sebacinales_sp	UCL8_009172
22_95	Serendipita__EU554995__sample	Populus	Canada	present_in	SH1750151.08FU	k__Fungi;p__Basidiomycota;c__Agaricomycetes;o__Sebacinales;f__unidentified;g__unidentified;s__Sebacinales_sp	UCL8_009172
22_96	Serendipita__EU554997__sample	Populus	Canada	present_in	SH1750151.08FU	k__Fungi;p__Basidiomycota;c__Agaricomycetes;o__Sebacinales;f__unidentified;g__unidentified;s__Sebacinales_sp	UCL8_009172
22_98	Serendipita__KF296988		Canada	present_in	SH1750151.08FU	k__Fungi;p__Basidiomycota;c__Agaricomycetes;o__Sebacinales;f__unidentified;g__unidentified;s__Sebacinales_sp	UCL8_009172
22_63	KX609421	Rhododendron_sp.	China	present_in	SH1750211.08FU	k__Fungi;p__Basidiomycota;c__Agaricomycetes;o__Sebacinales;f__unidentified;g__unidentified;s__Sebacinales_sp	UCL8_009172
22_67	Sebacinales__GU256978__sample	Rhododendron_floribundum	China	present_in	SH1750271.08FU	k__Fungi;p__Basidiomycota;c__Agaricomycetes;o__Sebacinales;f__unidentified;g__unidentified;s__Sebacinales_sp	UCL8_009172
22_876	MG707403	Pleione	China	present_in	SH1723688.08FU	k__Fungi;p__Basidiomycota;c__Agaricomycetes;o__Sebacinales;f__unidentified;g__unidentified;s__Sebacinales_sp	UCL8_007058
22_146	KJ188497	Neottia_ovata	Czechia	present_in	SH1723700.08FU	k__Fungi;p__Basidiomycota;c__Agaricomycetes;o__Sebacinales;f__unidentified;g__unidentified;s__Sebacinales_sp	UCL8_007058
22_288	KJ188519	Neottia_ovata	Czechia	present_in	SH1723700.08FU	k__Fungi;p__Basidiomycota;c__Agaricomycetes;o__Sebacinales;f__unidentified;g__unidentified;s__Sebacinales_sp	UCL8_007058
22_289	KJ188544	Neottia_ovata	Czechia	present_in	SH1723700.08FU	k__Fungi;p__Basidiomycota;c__Agaricomycetes;o__Sebacinales;f__unidentified;g__unidentified;s__Sebacinales_sp	UCL8_007058
22_143	KJ188500	Neottia_ovata	Estonia	present_in	SH1723700.08FU	k__Fungi;p__Basidiomycota;c__Agaricomycetes;o__Sebacinales;f__unidentified;g__unidentified;s__Sebacinales_sp	UCL8_007058
22_148	HQ154258	Trifolium_pratense	Germany	present_in	SH1723700.08FU	k__Fungi;p__Basidiomycota;c__Agaricomycetes;o__Sebacinales;f__unidentified;g__unidentified;s__Sebacinales_sp	UCL8_007058
22_151	HQ154229	Rumex	Germany	present_in	SH1723700.08FU	k__Fungi;p__Basidiomycota;c__Agaricomycetes;o__Sebacinales;f__unidentified;g__unidentified;s__Sebacinales_sp	UCL8_007058
22_153	HQ154241	Bistorta_officinalis	Germany	present_in	SH1723700.08FU	k__Fungi;p__Basidiomycota;c__Agaricomycetes;o__Sebacinales;f__unidentified;g__unidentified;s__Sebacinales_sp	UCL8_007058
22_152	HQ154239	Bistorta_officinalis	Germany	present_in	SH1723700.08FU	k__Fungi;p__Basidiomycota;c__Agaricomycetes;o__Sebacinales;f__unidentified;g__unidentified;s__Sebacinales_sp	UCL8_007058
22_155	EU910903	Plantago_media	Germany	present_in	SH1723700.08FU	k__Fungi;p__Basidiomycota;c__Agaricomycetes;o__Sebacinales;f__unidentified;g__unidentified;s__Sebacinales_sp	UCL8_007058
22_193	HQ154238	Bistorta_officinalis	Germany	duplicate_of_EU910903|Plantago_media|Germany	SH1723700.08FU	k__Fungi;p__Basidiomycota;c__Agaricomycetes;o__Sebacinales;f__unidentified;g__unidentified;s__Sebacinales_sp	UCL8_007058
22_207	HQ154369	Trifolium_repens	Germany	duplicate_of_EU910903|Plantago_media|Germany	SH1723700.08FU	k__Fungi;p__Basidiomycota;c__Agaricomycetes;o__Sebacinales;f__unidentified;g__unidentified;s__Sebacinales_sp	UCL8_007058
22_203	HQ154266	Trifolium_repens	Germany	present_in	SH1723700.08FU	k__Fungi;p__Basidiomycota;c__Agaricomycetes;o__Sebacinales;f__unidentified;g__unidentified;s__Sebacinales_sp	UCL8_007058
22_205	HQ154334	Luzula_sylvatica	Germany	present_in	SH1723700.08FU	k__Fungi;p__Basidiomycota;c__Agaricomycetes;o__Sebacinales;f__unidentified;g__unidentified;s__Sebacinales_sp	UCL8_007058
22_209	HQ154379	Trifolium_badium	Germany	present_in	SH1723700.08FU	k__Fungi;p__Basidiomycota;c__Agaricomycetes;o__Sebacinales;f__unidentified;g__unidentified;s__Sebacinales_sp	UCL8_007058
22_210	HQ154380	Trifolium_badium	Germany	present_in	SH1723700.08FU	k__Fungi;p__Basidiomycota;c__Agaricomycetes;o__Sebacinales;f__unidentified;g__unidentified;s__Sebacinales_sp	UCL8_007058
22_298	HQ154269	Trifolium_pratense	Germany	present_in	SH1723700.08FU	k__Fungi;p__Basidiomycota;c__Agaricomycetes;o__Sebacinales;f__unidentified;g__unidentified;s__Sebacinales_sp	UCL8_007058
22_301	EU910935	Dactylis_glomerata	Germany	present_in	SH1723700.08FU	k__Fungi;p__Basidiomycota;c__Agaricomycetes;o__Sebacinales;f__unidentified;g__unidentified;s__Sebacinales_sp	UCL8_007058
22_814	HQ154244	Bistorta_officinalis	Germany	present_in	SH1723666.08FU	k__Fungi;p__Basidiomycota;c__Agaricomycetes;o__Sebacinales;f__unidentified;g__unidentified;s__Sebacinales_sp	UCL8_007058
22_377	AB831802		Japan	present_in	SH1723692.08FU	k__Fungi;p__Basidiomycota;c__Agaricomycetes;o__Sebacinales;f__unidentified;g__unidentified;s__Sebacinales_sp	UCL8_007058
22_102	Serendipita__JQ917844__sample	Pinus_radiata	Mexico	present_in	SH1750151.08FU	k__Fungi;p__Basidiomycota;c__Agaricomycetes;o__Sebacinales;f__unidentified;g__unidentified;s__Sebacinales_sp	UCL8_009172
22_64	MK614835	Bistorta_vivipara	Norway	present_in	SH2760064.08FU	k__Fungi;p__Basidiomycota;c__Agaricomycetes;o__Sebacinales;f__unidentified;g__unidentified;s__Sebacinales_sp	UCL8_009172
22_101	MK614831	Bistorta_vivipara	Norway	present_in	SH1750151.08FU	k__Fungi;p__Basidiomycota;c__Agaricomycetes;o__Sebacinales;f__unidentified;g__unidentified;s__Sebacinales_sp	UCL8_009172
22_97	MK509463	Picea_abies	Slovakia	present_in	SH1750151.08FU	k__Fungi;p__Basidiomycota;c__Agaricomycetes;o__Sebacinales;f__unidentified;g__unidentified;s__Sebacinales_sp	UCL8_009172
22_993	FJ788832	Pterygodium_platypetalum	South_Africa	present_in	SH1723675.08FU	k__Fungi;p__Basidiomycota;c__Agaricomycetes;o__Sebacinales;f__unidentified;g__unidentified;s__Sebacinales_sp	UCL8_007058
22_994	FJ788836	Pterygodium_acutifolium	South_Africa	present_in	SH1723702.08FU	k__Fungi;p__Basidiomycota;c__Agaricomycetes;o__Sebacinales;f__unidentified;g__unidentified;s__Sebacinales_sp	UCL8_007058
22_147	KJ188511	Neottia_ovata	Sweden	present_in	SH1723700.08FU	k__Fungi;p__Basidiomycota;c__Agaricomycetes;o__Sebacinales;f__unidentified;g__unidentified;s__Sebacinales_sp	UCL8_007058
22_99	Serendipita__KF617875		United_States	present_in	SH1750151.08FU	k__Fungi;p__Basidiomycota;c__Agaricomycetes;o__Sebacinales;f__unidentified;g__unidentified;s__Sebacinales_sp	UCL8_009172
22_100	JX630403	Salix_arctica	United_States	present_in	SH1750151.08FU	k__Fungi;p__Basidiomycota;c__Agaricomycetes;o__Sebacinales;f__unidentified;g__unidentified;s__Sebacinales_sp	UCL8_009172
22_103	JX030285	Castanea_dentata	United_States	present_in	SH1750151.08FU	k__Fungi;p__Basidiomycota;c__Agaricomycetes;o__Sebacinales;f__unidentified;g__unidentified;s__Sebacinales_sp	UCL8_009172
22_104	KJ624715		Unspecified	present_in	SH1750151.08FU	k__Fungi;p__Basidiomycota;c__Agaricomycetes;o__Sebacinales;f__unidentified;g__unidentified;s__Sebacinales_sp	UCL8_009172
22_132	GU189706	Triticum_aestivum_TUB_019198	Unspecified	present_in	SH1723700.08FU	k__Fungi;p__Basidiomycota;c__Agaricomycetes;o__Sebacinales;f__unidentified;g__unidentified;s__Sebacinales_sp	UCL8_007058
22_154	EU910897	Plantago_media	Unspecified	present_in	SH1723700.08FU	k__Fungi;p__Basidiomycota;c__Agaricomycetes;o__Sebacinales;f__unidentified;g__unidentified;s__Sebacinales_sp	UCL8_007058
22_261	HQ180324	Trifolium_pratense	Unspecified	duplicate_of_EU910903|Plantago_media|Germany	SH1723700.08FU	k__Fungi;p__Basidiomycota;c__Agaricomycetes;o__Sebacinales;f__unidentified;g__unidentified;s__Sebacinales_sp	UCL8_007058
22_164	GU189679	Lolium_perenne_TUB_019191	Unspecified	present_in	SH1723700.08FU	k__Fungi;p__Basidiomycota;c__Agaricomycetes;o__Sebacinales;f__unidentified;g__unidentified;s__Sebacinales_sp	UCL8_007058
22_172	GU189702	Poaceae_sp._TUB_019192	Unspecified	present_in	SH1723700.08FU	k__Fungi;p__Basidiomycota;c__Agaricomycetes;o__Sebacinales;f__unidentified;g__unidentified;s__Sebacinales_sp	UCL8_007058
22_215	HQ180270	Plantago_lanceolata	Unspecified	present_in	SH1723700.08FU	k__Fungi;p__Basidiomycota;c__Agaricomycetes;o__Sebacinales;f__unidentified;g__unidentified;s__Sebacinales_sp	UCL8_007058
22_267	HQ180332	Ranunculus_bulbosus	Unspecified	present_in	SH1723700.08FU	k__Fungi;p__Basidiomycota;c__Agaricomycetes;o__Sebacinales;f__unidentified;g__unidentified;s__Sebacinales_sp	UCL8_007058
22_295	GU189684	Poaceae_sp._TUB_019194	Unspecified	present_in	SH1723700.08FU	k__Fungi;p__Basidiomycota;c__Agaricomycetes;o__Sebacinales;f__unidentified;g__unidentified;s__Sebacinales_sp	UCL8_007058
22_297	GU189712	Plantago_lanceolata_TUB_019201	Unspecified	present_in	SH1723700.08FU	k__Fungi;p__Basidiomycota;c__Agaricomycetes;o__Sebacinales;f__unidentified;g__unidentified;s__Sebacinales_sp	UCL8_007058
22_296	GU189698	Poaceae_sp._TUB_019266	Unspecified	present_in	SH1723700.08FU	k__Fungi;p__Basidiomycota;c__Agaricomycetes;o__Sebacinales;f__unidentified;g__unidentified;s__Sebacinales_sp	UCL8_007058
22_299	GU189700	Pisum_sativum_TUB_019197	Unspecified	present_in	SH1723700.08FU	k__Fungi;p__Basidiomycota;c__Agaricomycetes;o__Sebacinales;f__unidentified;g__unidentified;s__Sebacinales_sp	UCL8_007058
22_302	HQ180290	Trifolium_repens	Unspecified	present_in	SH1723700.08FU	k__Fungi;p__Basidiomycota;c__Agaricomycetes;o__Sebacinales;f__unidentified;g__unidentified;s__Sebacinales_sp	UCL8_007058
22_995	GU189685	x_Triticosecale_TUB_019211	Unspecified	present_in	SH1723669.08FU	k__Fungi;p__Basidiomycota;c__Agaricomycetes;o__Sebacinales;f__unidentified;g__unidentified;s__Sebacinales_sp	UCL8_007058
22_69	KF000590	Bistorta_vivipara	Germany	present_in	SH1690920.08FU	k__Fungi;p__Basidiomycota;c__Agaricomycetes;o__Thelephorales;f__Thelephoraceae;g__Tomentella;s__Tomentella_lapida	UCL8_004608
22_1139	Helvellosebacina__MK564603		United_States	present_in	SH2760474.08FU	k__Fungi;p__Basidiomycota;c__Tremellomycetes;o__Tremellales;f__Tremellaceae;g__Tremella;s__Tremella_sp	UCL8_007146
22_692	Sebacina__AB982068	Pseudotsuga_sinensis	China	present_in	SH1731184.08FU	k__Fungi;p__unidentified;c__unidentified;o__unidentified;f__unidentified;g__unidentified;s__Fungi_sp	UCL8_007582
22_690	Sebacina__MG547649	Pinus_pumila	Japan	present_in	SH1731193.08FU	k__Fungi;p__unidentified;c__unidentified;o__unidentified;f__unidentified;g__unidentified;s__Fungi_sp	UCL8_007582
22_704	Sebacina__LC364208	Pinus_amamiana	Japan	present_in	SH2767875.08FU	k__Fungi;p__unidentified;c__unidentified;o__unidentified;f__unidentified;g__unidentified;s__Fungi_sp	UCL8_007582
22_818	Sebacina__LC364215	Pinus_amamiana	Japan	present_in	SH2767870.08FU	k__Fungi;p__unidentified;c__unidentified;o__unidentified;f__unidentified;g__unidentified;s__Fungi_sp	UCL8_007582
22_110	Sebacina__MG761427	Pinus_ponderosa	United_States	present_in	SH1731161.08FU	k__Fungi;p__unidentified;c__unidentified;o__unidentified;f__unidentified;g__unidentified;s__Fungi_sp	UCL8_007582
